# Supplementary material
Source: publisher figshare collection journal article supplement (https://acs.figshare.com/ndownloader/files/3725470)
Supplement: Supplementary file 1 [file 3725470]

 
data_kbg239
 
_audit_creation_method            'SHELXL-2014/7'
_shelx_SHELXL_version_number      '2014/7'
_chemical_name_systematic         ?
_chemical_name_common             'Gd3N@D2(35)-C88 . Ni(OEP) . 2 toluene'
_chemical_melting_point           ?
_chemical_formula_moiety          'C88 Gd3 N, C36 H44 N4 Ni, 2 (C7 H8)'
_chemical_formula_sum
 'C138 H60 Gd3 N5 Ni' 
_chemical_formula_weight          2318.37

loop_
 _atom_type_symbol
 _atom_type_description
 _atom_type_scat_dispersion_real
 _atom_type_scat_dispersion_imag
 _atom_type_scat_source
 'C'  'C'   0.0040   0.0020
 'International Tables Vol C Tables 4.2.6.8 and 6.1.1.4'
 'H'  'H'   0.0000   0.0000
 'International Tables Vol C Tables 4.2.6.8 and 6.1.1.4'
 'N'  'N'   0.0076   0.0040
 'International Tables Vol C Tables 4.2.6.8 and 6.1.1.4'
 'Ni'  'Ni'   0.3262   1.3024
 'International Tables Vol C Tables 4.2.6.8 and 6.1.1.4'
 'Gd'  'Gd'  -0.1004   4.5392
 'International Tables Vol C Tables 4.2.6.8 and 6.1.1.4'
 
_space_group_crystal_system       monoclinic
_space_group_IT_number            12
_space_group_name_H-M_alt         'C 2/m'
_space_group_name_Hall            '-C 2y'
 
_shelx_space_group_comment
;
The symmetry employed for this shelxl refinement is uniquely defined
by the following loop, which should always be used as a source of
symmetry information in preference to the above space-group names.
They are only intended as comments.
;
 
loop_
 _space_group_symop_operation_xyz
 'x, y, z'
 '-x, y, -z'
 'x+1/2, y+1/2, z'
 '-x+1/2, y+1/2, -z'
 '-x, -y, -z'
 'x, -y, z'
 '-x+1/2, -y+1/2, -z'
 'x+1/2, -y+1/2, z'
 
_cell_length_a                    25.2389(16)
_cell_length_b                    15.3624(9)
_cell_length_c                    20.5877(12)
_cell_angle_alpha                 90
_cell_angle_beta                  94.599(3)
_cell_angle_gamma                 90
_cell_volume                      7956.8(8)
_cell_formula_units_Z             4
_cell_measurement_temperature     100(2)
_cell_measurement_reflns_used     9594
_cell_measurement_theta_min       2.804
_cell_measurement_theta_max       40.283
 
_exptl_crystal_description        block
_exptl_crystal_colour             black
_exptl_crystal_density_meas       ?
_exptl_crystal_density_method     ?
_exptl_crystal_density_diffrn     1.935          
_exptl_crystal_F_000              4572
_exptl_transmission_factor_min    ?
_exptl_transmission_factor_max    ?
_exptl_crystal_size_max           0.220
_exptl_crystal_size_mid           0.190
_exptl_crystal_size_min           0.060
_exptl_absorpt_coefficient_mu     3.471
_shelx_estimated_absorpt_T_min    0.516
_shelx_estimated_absorpt_T_max    0.819
_exptl_absorpt_correction_type    multi-scan
_exptl_absorpt_correction_T_min   0.3766
_exptl_absorpt_correction_T_max   0.4420
_exptl_absorpt_process_details    'SADABS (Sheldrick, 2014)'
_exptl_absorpt_special_details    ?

_diffrn_ambient_temperature       100(2)
_diffrn_radiation_wavelength      0.7749
_diffrn_radiation_type            synchrotron
_diffrn_source                    'ALS, Beamline 11.3.1'
_diffrn_measurement_device_type   'Bruker D8 with PHOTON 100 CMOS detector'
_diffrn_measurement_method        '\w and \f scans'
_diffrn_detector_area_resol_mean  10.42
_diffrn_reflns_number             89654
_diffrn_reflns_av_unetI/netI      0.0395
_diffrn_reflns_av_R_equivalents   0.0531
_diffrn_reflns_limit_h_min        -41
_diffrn_reflns_limit_h_max        42
_diffrn_reflns_limit_k_min        -25
_diffrn_reflns_limit_k_max        25
_diffrn_reflns_limit_l_min        -34
_diffrn_reflns_limit_l_max        33
_diffrn_reflns_theta_min          2.143
_diffrn_reflns_theta_max          40.310
_diffrn_reflns_theta_full         27.706
_diffrn_measured_fraction_theta_max   0.993
_diffrn_measured_fraction_theta_full  0.999
_diffrn_reflns_Laue_measured_fraction_max    0.993
_diffrn_reflns_Laue_measured_fraction_full   0.999
_diffrn_reflns_point_group_measured_fraction_max   0.993
_diffrn_reflns_point_group_measured_fraction_full  0.999
_reflns_number_total              19828
_reflns_number_gt                 15548
_reflns_threshold_expression      'I > 2\s(I)'
_reflns_Friedel_coverage          0.000
_reflns_Friedel_fraction_max      .
_reflns_Friedel_fraction_full     .
 
_reflns_special_details
;
 Reflections were merged by SHELXL according to the crystal
 class for the calculation of statistics and refinement.
 
 _reflns_Friedel_fraction is defined as the number of unique
 Friedel pairs measured divided by the number that would be
 possible theoretically, ignoring centric projections and
 systematic absences.
;
 
_computing_data_collection        'Apex2 (Bruker, 2014)'
_computing_cell_refinement        'SAINT (Bruker, 2014)'
_computing_data_reduction         'SAINT (Bruker, 2014)'
_computing_structure_solution     'SHELXS (Sheldrick, 2008)'
_computing_structure_refinement   'SHELXL-2014/7 (Sheldrick, 2014)'
_computing_molecular_graphics     ?
_computing_publication_material   'SHELXL-2014 (Sheldrick, 2014)'

_refine_special_details 
;
 The C88 cage (D2 symmetry, isomer 35) resides on a crystallographic mirror 
 plane. It was modeled from a previously determined cage and refined ignoring
 crystallographic symmetry (PART -1 10.5) as a rigid group
 with the use of anisotropic thermal displacement parameters. 
 There are three evident orientations of the interior Gd3N cluster. There
 are also three additional Gd positions 
 (Gd10, Gd11, Gd12) that were not modelable as a cluster and probably share
 other Gd positions. 
 The three sets of three Gd atoms were refined with the following occupancies 
 (Gd1, Gd2, Gd3: 0.2314(7); Gd4, Gd5, Gd6: 0.1525(9);
 Gd7, Gd8, Gd9: 0.0802(8)). Due to the mirror plane, the other enantiomer
 occupies the same crystallographic site. 
  
 All Gd positions were summed such
 that the occupancy sum is 1.5 (SUMP) due to the mirror plane.
 
 One toluene is crystallographically disordered and was refined ignoring
 symmetry (PART -1 10.5). The remaining disordered toluene molecule resides
 on a mirror plane and the two orientations were modeled to sum to 0.5. The
 minor orientation of the toluene molecule was modeled using AFIX 6.
;          

_refine_ls_structure_factor_coef  Fsqd
_refine_ls_matrix_type            full
_refine_ls_weighting_scheme       calc
_refine_ls_weighting_details
'w=1/[\s^2^(Fo^2^)+(0.1356P)^2^+52.5090P] where P=(Fo^2^+2Fc^2^)/3'
_atom_sites_solution_primary      ?
_atom_sites_solution_secondary    ?
_atom_sites_solution_hydrogens    mixed
_refine_ls_hydrogen_treatment     constr
_refine_ls_extinction_method      none
_refine_ls_extinction_coef        .
_refine_ls_number_reflns          19828
_refine_ls_number_parameters      983
_refine_ls_number_restraints      847
_refine_ls_R_factor_all           0.1101
_refine_ls_R_factor_gt            0.0888
_refine_ls_wR_factor_ref          0.2670
_refine_ls_wR_factor_gt           0.2424
_refine_ls_goodness_of_fit_ref    1.036
_refine_ls_restrained_S_all       1.076
_refine_ls_shift/su_max           0.000
_refine_ls_shift/su_mean          0.000
 
loop_
 _atom_site_label
 _atom_site_type_symbol
 _atom_site_fract_x
 _atom_site_fract_y
 _atom_site_fract_z
 _atom_site_U_iso_or_equiv
 _atom_site_adp_type
 _atom_site_occupancy
 _atom_site_site_symmetry_order  
 _atom_site_calc_flag
 _atom_site_refinement_flags_posn
 _atom_site_refinement_flags_adp
 _atom_site_refinement_flags_occupancy
 _atom_site_disorder_assembly
 _atom_site_disorder_group
Gd1 Gd 0.35581(3) 0.11652(4) 0.32252(3) 0.02206(15) Uani 0.2314(7) 1 d . . P A 1
Gd2 Gd 0.23944(4) -0.01859(6) 0.24000(6) 0.0410(3) Uani 0.2314(7) 1 d . . P A 1
Gd3 Gd 0.34484(11) -0.10406(14) 0.37174(11) 0.0495(7) Uani 0.2314(7) 1 d . . P A 1
Gd4 Gd 0.33465(10) 0.11772(16) 0.36878(9) 0.0177(3) Uani 0.1525(9) 1 d . U P A 2
Gd5 Gd 0.26768(8) 0.01608(10) 0.21723(5) 0.0329(4) Uani 0.1525(9) 1 d . U P A 2
Gd6 Gd 0.32463(10) -0.13595(11) 0.34909(12) 0.0279(3) Uani 0.1525(9) 1 d . U P A 2
Gd7 Gd 0.2416(3) -0.0694(6) 0.2652(5) 0.118(3) Uani 0.0802(8) 1 d . U P A 3
Gd8 Gd 0.32957(19) 0.13415(19) 0.2981(3) 0.0713(14) Uani 0.0802(8) 1 d . U P A 3
Gd9 Gd 0.3634(3) -0.0722(7) 0.3763(4) 0.118(3) Uani 0.0802(8) 1 d . U P A 3
Gd10 Gd 0.2985(3) 0.0356(5) 0.2085(3) 0.029(2) Uani 0.0227(10) 1 d . U P A 4
Gd11 Gd 0.2640(5) 0.0516(7) 0.2250(5) 0.057(3) Uani 0.0362(17) 1 d . U P A 4
Gd12 Gd 0.3000(5) -0.1296(4) 0.3500(4) 0.065(2) Uani 0.0488(18) 1 d . U P A 4
N1 N 0.30958(12) 0.0000 0.31049(14) 0.0172(5) Uani 1 2 d S T P . .
C1 C 0.39545(8) 0.17209(15) 0.20862(9) 0.060(2) Uani 0.5 1 d G U P A -1
C2 C 0.34965(8) 0.17203(16) 0.16354(9) 0.075(3) Uani 0.5 1 d G U P A -1
C3 C 0.33547(7) 0.09289(17) 0.12998(7) 0.065(2) Uani 0.5 1 d G U P A -1
C4 C 0.42352(5) -0.07325(16) 0.22212(7) 0.0402(16) Uani 0.5 1 d G U P A -1
C5 C 0.40918(5) 0.01036(17) 0.18986(7) 0.0469(16) Uani 0.5 1 d G U P A -1
C6 C 0.36446(6) 0.01507(17) 0.14043(6) 0.059(2) Uani 0.5 1 d G U P A -1
C7 C 0.33674(7) -0.06086(18) 0.12310(5) 0.058(2) Uani 0.5 1 d G U P A -1
C8 C 0.34886(7) -0.14453(16) 0.15441(7) 0.0467(17) Uani 0.5 1 d G U P A -1
C9 C 0.39159(6) -0.15029(16) 0.20340(8) 0.0498(18) Uani 0.5 1 d G U P A -1
C10 C 0.38572(7) -0.22047(14) 0.24967(10) 0.057(2) Uani 0.5 1 d G U P A -1
C11 C 0.41543(7) -0.21401(14) 0.31207(10) 0.060(2) Uani 0.5 1 d G U P A -1
C12 C 0.44890(5) -0.14045(15) 0.32866(9) 0.0478(19) Uani 0.5 1 d G U P A -1
C13 C 0.45453(4) -0.07092(16) 0.28470(8) 0.0427(17) Uani 0.5 1 d G U P A -1
C14 C 0.47148(4) 0.00728(17) 0.31529(8) 0.0382(12) Uani 0.5 1 d G U P A -1
C15 C 0.45771(5) 0.08654(17) 0.27908(9) 0.0360(15) Uani 0.5 1 d G U P A -1
C16 C 0.42575(6) 0.09253(16) 0.21925(8) 0.053(2) Uani 0.5 1 d G U P A -1
C17 C 0.27998(8) 0.09659(18) 0.11231(7) 0.069(2) Uani 0.5 1 d G U P A -1
C18 C 0.25119(7) 0.01734(18) 0.10289(6) 0.064(2) Uani 0.5 1 d G U P A -1
C19 C 0.27995(7) -0.06041(18) 0.10391(5) 0.057(2) Uani 0.5 1 d G U P A -1
C20 C 0.25793(7) -0.14076(17) 0.12593(7) 0.0473(17) Uani 0.5 1 d G U P A -1
C21 C 0.30079(7) -0.19411(16) 0.15104(8) 0.0503(18) Uani 0.5 1 d G U P A -1
C22 C 0.29529(8) -0.25804(13) 0.19978(10) 0.0482(17) Uani 0.5 1 d G U P A -1
C23 C 0.33944(8) -0.27281(12) 0.24678(11) 0.0439(16) Uani 0.5 1 d G U P A -1
C24 C 0.31623(9) -0.29295(11) 0.31039(11) 0.0432(15) Uani 0.5 1 d G U P A -1
C25 C 0.34110(8) -0.27595(12) 0.37187(11) 0.0543(19) Uani 0.5 1 d G U P A -1
C26 C 0.39480(8) -0.24463(13) 0.37066(11) 0.068(2) Uani 0.5 1 d G U P A -1
C27 C 0.41544(7) -0.18808(15) 0.42664(9) 0.0487(17) Uani 0.5 1 d G U P A -1
C28 C 0.45206(6) -0.12939(16) 0.39717(9) 0.0522(19) Uani 0.5 1 d G U P A -1
C29 C 0.46233(5) -0.04513(17) 0.42508(8) 0.0515(18) Uani 0.5 1 d G U P A -1
C30 C 0.47480(5) 0.02300(17) 0.38557(8) 0.0474(17) Uani 0.5 1 d G U P A -1
C31 C 0.46097(6) 0.11323(16) 0.39040(9) 0.0493(18) Uani 0.5 1 d G U P A -1
C32 C 0.45577(7) 0.15296(16) 0.32768(10) 0.0381(15) Uani 0.5 1 d G U P A -1
C33 C 0.42220(8) 0.22474(14) 0.31909(11) 0.0508(19) Uani 0.5 1 d G U P A -1
C34 C 0.39316(9) 0.23448(14) 0.25791(11) 0.058(2) Uani 0.5 1 d G U P A -1
C35 C 0.34247(10) 0.27994(12) 0.26996(12) 0.069(2) Uani 0.5 1 d G U P A -1
C36 C 0.29746(10) 0.27104(12) 0.22657(12) 0.087(3) Uani 0.5 1 d G U P A -1
C37 C 0.30360(9) 0.22262(15) 0.16835(10) 0.087(3) Uani 0.5 1 d G U P A -1
C38 C 0.25751(9) 0.17496(16) 0.13918(9) 0.085(3) Uani 0.5 1 d G U P A -1
C39 C 0.20912(8) 0.16882(16) 0.16595(10) 0.087(3) Uani 0.5 1 d G U P A -1
C40 C 0.18010(7) 0.09107(17) 0.15905(9) 0.078(3) Uani 0.5 1 d G U P A -1
C41 C 0.19940(6) 0.01608(18) 0.12464(7) 0.067(2) Uani 0.5 1 d G U P A -1
C42 C 0.17816(6) -0.06378(17) 0.15085(8) 0.0527(19) Uani 0.5 1 d G U P A -1
C43 C 0.20847(6) -0.14294(16) 0.15450(8) 0.0449(16) Uani 0.5 1 d G U P A -1
C44 C 0.20316(7) -0.20158(15) 0.20956(9) 0.0386(14) Uani 0.5 1 d G U P A -1
C45 C 0.24606(8) -0.26080(13) 0.22992(10) 0.0435(16) Uani 0.5 1 d G U P A -1
C46 C 0.25809(8) -0.28288(11) 0.29885(11) 0.0453(16) Uani 0.5 1 d G U P A -1
C47 C 0.22874(8) -0.24634(12) 0.34900(10) 0.0446(16) Uani 0.5 1 d G U P A -1
C48 C 0.25647(8) -0.23001(13) 0.41138(10) 0.0503(17) Uani 0.5 1 d G U P A -1
C49 C 0.31326(9) -0.24923(13) 0.42365(10) 0.059(2) Uani 0.5 1 d G U P A -1
C50 C 0.33180(8) -0.18727(15) 0.47485(8) 0.063(2) Uani 0.5 1 d G U P A -1
C51 C 0.38577(8) -0.15842(16) 0.47545(8) 0.065(2) Uani 0.5 1 d G U P A -1
C52 C 0.39483(8) -0.07676(17) 0.50179(6) 0.067(2) Uani 0.5 1 d G U P A -1
C53 C 0.43524(7) -0.02055(17) 0.47872(7) 0.064(2) Uani 0.5 1 d G U P A -1
C54 C 0.41849(7) 0.06855(17) 0.48912(7) 0.064(2) Uani 0.5 1 d G U P A -1
C55 C 0.42985(7) 0.13562(16) 0.44271(9) 0.062(2) Uani 0.5 1 d G U P A -1
C56 C 0.39181(9) 0.20742(14) 0.43218(10) 0.071(2) Uani 0.5 1 d G U P A -1
C57 C 0.39122(9) 0.25265(13) 0.37061(11) 0.064(2) Uani 0.5 1 d G U P A -1
C58 C 0.34188(10) 0.28710(11) 0.34006(12) 0.077(2) Uani 0.5 1 d G U P A -1
C59 C 0.18584(6) -0.19482(14) 0.32837(10) 0.0439(15) Uani 0.5 1 d G U P A -1
C60 C 0.17180(6) -0.17681(15) 0.26094(10) 0.0374(14) Uani 0.5 1 d G U P A -1
C61 C 0.14583(4) -0.09385(16) 0.26004(10) 0.0414(15) Uani 0.5 1 d G U P A -1
C62 C 0.14852(5) -0.04043(17) 0.20470(9) 0.055(2) Uani 0.5 1 d G U P A -1
C63 C 0.15116(5) 0.05205(17) 0.21245(10) 0.078(3) Uani 0.5 1 d G U P A -1
C64 C 0.20430(8) 0.21461(14) 0.22599(12) 0.090(3) Uani 0.5 1 d G U P A -1
C65 C 0.24868(10) 0.26977(12) 0.25263(13) 0.086(3) Uani 0.5 1 d G U P A -1
C66 C 0.24689(9) 0.26549(12) 0.32206(13) 0.074(3) Uani 0.5 1 d G U P A -1
C67 C 0.29259(10) 0.27411(11) 0.36827(12) 0.079(2) Uani 0.5 1 d G U P A -1
C68 C 0.29458(9) 0.23178(13) 0.42769(11) 0.081(3) Uani 0.5 1 d G U P A -1
C69 C 0.34295(9) 0.20154(14) 0.46189(10) 0.075(2) Uani 0.5 1 d G U P A -1
C70 C 0.33080(9) 0.12913(16) 0.50205(8) 0.070(2) Uani 0.5 1 d G U P A -1
C71 C 0.36926(8) 0.06571(17) 0.51939(6) 0.069(2) Uani 0.5 1 d G U P A -1
C72 C 0.35033(8) -0.02103(17) 0.52290(5) 0.070(2) Uani 0.5 1 d G U P A -1
C73 C 0.29779(8) -0.04282(17) 0.50704(5) 0.070(2) Uani 0.5 1 d G U P A -1
C74 C 0.28959(8) -0.13127(16) 0.48699(7) 0.073(2) Uani 0.5 1 d G U P A -1
C75 C 0.24336(7) -0.15626(15) 0.44756(8) 0.062(2) Uani 0.5 1 d G U P A -1
C76 C 0.20547(6) -0.09548(15) 0.42232(8) 0.0582(19) Uani 0.5 1 d G U P A -1
C77 C 0.17453(5) -0.11725(15) 0.36508(9) 0.0450(15) Uani 0.5 1 d G U P A -1
C78 C 0.14868(4) -0.05348(16) 0.32244(9) 0.0411(15) Uani 0.5 1 d G U P A -1
C79 C 0.15794(5) 0.03591(16) 0.33232(10) 0.062(2) Uani 0.5 1 d G U P A -1
C80 C 0.15462(5) 0.09046(16) 0.27489(10) 0.077(3) Uani 0.5 1 d G U P A -1
C81 C 0.17898(7) 0.17494(14) 0.27803(12) 0.078(3) Uani 0.5 1 d G U P A -1
C82 C 0.20718(8) 0.20408(13) 0.33860(12) 0.078(3) Uani 0.5 1 d G U P A -1
C83 C 0.21087(7) 0.14947(14) 0.39422(10) 0.074(2) Uani 0.5 1 d G U P A -1
C84 C 0.25204(8) 0.17198(14) 0.44063(10) 0.077(3) Uani 0.5 1 d G U P A -1
C85 C 0.27601(8) 0.10733(16) 0.48552(8) 0.077(2) Uani 0.5 1 d G U P A -1
C86 C 0.25828(7) 0.01972(16) 0.48270(6) 0.079(2) Uani 0.5 1 d G U P A -1
C87 C 0.21321(6) -0.00351(16) 0.43684(8) 0.0648(18) Uani 0.5 1 d G U P A -1
C88 C 0.18857(6) 0.06218(15) 0.39225(9) 0.069(2) Uani 0.5 1 d G U P A -1
Ni1 Ni 0.48053(2) 0.0000 0.08132(2) 0.01359(9) Uani 1 2 d S T P . .
N2 N 0.42360(11) 0.0000 0.01082(14) 0.0163(4) Uani 1 2 d S T P . .
N3 N 0.47943(8) 0.12768(13) 0.08245(9) 0.0156(3) Uani 1 1 d . . . . .
N4 N 0.53606(11) 0.0000 0.15371(14) 0.0156(4) Uani 1 2 d S T P . .
C91 C 0.35580(9) 0.04417(17) -0.06567(12) 0.0188(4) Uani 1 1 d . . . . .
C92 C 0.39804(9) 0.07074(15) -0.01863(11) 0.0164(3) Uani 1 1 d . . . . .
C93 C 0.40974(10) 0.15636(16) -0.00416(12) 0.0183(4) Uani 1 1 d . . . . .
H93 H 0.3904 0.2000 -0.0286 0.022 Uiso 1 1 calc R U . . .
C94 C 0.44784(9) 0.18282(15) 0.04372(11) 0.0170(4) Uani 1 1 d . . . . .
C95 C 0.45852(10) 0.27315(16) 0.05923(13) 0.0205(4) Uani 1 1 d . . . . .
C96 C 0.49811(11) 0.27336(16) 0.10845(13) 0.0206(4) Uani 1 1 d . . . . .
C97 C 0.51077(9) 0.18293(15) 0.12221(11) 0.0172(4) Uani 1 1 d . . . . .
C98 C 0.54870(10) 0.15661(15) 0.16992(12) 0.0186(4) Uani 1 1 d . . . . .
H98 H 0.5685 0.2002 0.1939 0.022 Uiso 1 1 calc R U . . .
C99 C 0.55961(9) 0.07076(16) 0.18490(11) 0.0173(4) Uani 1 1 d . . . . .
C100 C 0.59767(10) 0.04434(17) 0.23751(12) 0.0198(4) Uani 1 1 d . . . . .
C101 C 0.31759(11) 0.10494(19) -0.10177(13) 0.0231(4) Uani 1 1 d . . . . .
H10A H 0.3012 0.0754 -0.1412 0.028 Uiso 1 1 calc R U . . .
H10B H 0.3371 0.1565 -0.1160 0.028 Uiso 1 1 calc R U . . .
C102 C 0.27380(12) 0.1345(2) -0.05935(16) 0.0299(6) Uani 1 1 d . . . . .
H10C H 0.2496 0.1743 -0.0843 0.045 Uiso 1 1 calc R U . . .
H10D H 0.2899 0.1645 -0.0206 0.045 Uiso 1 1 calc R U . . .
H10E H 0.2539 0.0837 -0.0460 0.045 Uiso 1 1 calc R U . . .
C103 C 0.42968(12) 0.34878(18) 0.02712(15) 0.0260(5) Uani 1 1 d . . . . .
H10F H 0.4270 0.3400 -0.0207 0.031 Uiso 1 1 calc R U . . .
H10G H 0.4506 0.4024 0.0368 0.031 Uiso 1 1 calc R U . . .
C104 C 0.37352(15) 0.3614(2) 0.0495(2) 0.0376(7) Uani 1 1 d . . . . .
H10H H 0.3760 0.3742 0.0963 0.056 Uiso 1 1 calc R U . . .
H10I H 0.3528 0.3081 0.0410 0.056 Uiso 1 1 calc R U . . .
H10J H 0.3560 0.4099 0.0255 0.056 Uiso 1 1 calc R U . . .
C105 C 0.52394(13) 0.34898(18) 0.14398(15) 0.0266(5) Uani 1 1 d . . . . .
H10K H 0.5186 0.4017 0.1166 0.032 Uiso 1 1 calc R U . . .
H10L H 0.5626 0.3381 0.1507 0.032 Uiso 1 1 calc R U . . .
C106 C 0.50230(19) 0.3662(3) 0.2101(2) 0.0420(8) Uani 1 1 d . . . . .
H10M H 0.5218 0.4147 0.2317 0.063 Uiso 1 1 calc R U . . .
H10N H 0.5068 0.3139 0.2372 0.063 Uiso 1 1 calc R U . . .
H10O H 0.4645 0.3809 0.2036 0.063 Uiso 1 1 calc R U . . .
C107 C 0.62804(11) 0.10504(19) 0.28368(13) 0.0243(5) Uani 1 1 d . . . . .
H10P H 0.6430 0.1528 0.2584 0.029 Uiso 1 1 calc R U . . .
H10Q H 0.6582 0.0731 0.3064 0.029 Uiso 1 1 calc R U . . .
C108 C 0.59409(14) 0.1443(2) 0.33445(14) 0.0296(6) Uani 1 1 d . . . . .
H10R H 0.6164 0.1810 0.3644 0.044 Uiso 1 1 calc R U . . .
H10S H 0.5785 0.0974 0.3590 0.044 Uiso 1 1 calc R U . . .
H10T H 0.5656 0.1795 0.3125 0.044 Uiso 1 1 calc R U . . .
C109 C 0.3215(2) 0.5000 0.2516(3) 0.0184(9) Uani 0.6 2 d S T P B 5
C110 C 0.3694(3) 0.5000 0.2899(4) 0.0195(11) Uani 0.6 2 d S T P B 5
H110 H 0.4020 0.5000 0.2698 0.023 Uiso 0.6 2 calc R U P B 5
C111 C 0.3700(3) 0.5000 0.3584(3) 0.0226(10) Uani 0.6 2 d S T P B 5
H111 H 0.4029 0.5000 0.3842 0.027 Uiso 0.6 2 calc R U P B 5
C112 C 0.3226(3) 0.5000 0.3879(3) 0.0212(10) Uani 0.6 2 d S T P B 5
H112 H 0.3224 0.5000 0.4340 0.025 Uiso 0.6 2 calc R U P B 5
C113 C 0.2755(8) 0.5000 0.3481(5) 0.030(3) Uani 0.6 2 d S T P B 5
H113 H 0.2429 0.5000 0.3681 0.036 Uiso 0.6 2 calc R U P B 5
C114 C 0.2740(3) 0.5000 0.2828(3) 0.0203(10) Uani 0.6 2 d S T P B 5
H114 H 0.2408 0.5000 0.2576 0.024 Uiso 0.6 2 calc R U P B 5
C115 C 0.3209(7) 0.5000 0.1790(5) 0.028(2) Uani 0.6 2 d S T P B 5
H11A H 0.3561 0.5161 0.1661 0.042 Uiso 0.3 1 calc R U P B 5
H11B H 0.2945 0.5421 0.1609 0.042 Uiso 0.3 1 calc R U P B 5
H11C H 0.3116 0.4418 0.1624 0.042 Uiso 0.3 1 calc R U P B 5
C116 C 0.3087(7) 0.5000 0.3136(8) 0.041(3) Uani 0.4 2 d S T P C 6
C117 C 0.2828(6) 0.5000 0.2531(10) 0.043(3) Uani 0.4 2 d S T P C 6
H117 H 0.2451 0.5000 0.2479 0.052 Uiso 0.4 2 calc R U P C 6
C118 C 0.3134(12) 0.5000 0.1968(14) 0.051(6) Uani 0.4 2 d S T P C 6
H118 H 0.2955 0.5000 0.1545 0.061 Uiso 0.4 2 calc R U P C 6
C119 C 0.3666(8) 0.5000 0.2034(9) 0.049(4) Uani 0.4 2 d S T P C 6
H119 H 0.3867 0.5000 0.1662 0.059 Uiso 0.4 2 calc R U P C 6
C120 C 0.3925(9) 0.5000 0.2676(9) 0.052(5) Uani 0.4 2 d S T P C 6
H120 H 0.4302 0.5000 0.2734 0.063 Uiso 0.4 2 calc R U P C 6
C121 C 0.3651(6) 0.5000 0.3180(10) 0.036(3) Uani 0.4 2 d S T P C 6
H121 H 0.3837 0.5000 0.3600 0.043 Uiso 0.4 2 calc R U P C 6
C122 C 0.2776(12) 0.5000 0.3669(14) 0.045(6) Uani 0.4 2 d S T P C 6
H12A H 0.2942 0.5373 0.4013 0.068 Uiso 0.2 1 calc R U P C 6
H12B H 0.2748 0.4405 0.3834 0.068 Uiso 0.2 1 calc R U P C 6
H12C H 0.2421 0.5222 0.3532 0.068 Uiso 0.2 1 calc R U P C 6
C123 C 0.04305(19) -0.0470(4) 0.4221(2) 0.0436(18) Uani 0.5 1 d G . P D -1
C124 C 0.0150(2) 0.0071(5) 0.3772(2) 0.063(3) Uani 0.5 1 d G . P D -1
H12G H -0.0059 -0.0174 0.3411 0.076 Uiso 0.5 1 d G U P D -1
C125 C 0.0174(3) 0.0970(5) 0.3851(3) 0.070(4) Uani 0.5 1 d G . P D -1
H12H H -0.0018 0.1340 0.3545 0.084 Uiso 0.5 1 d G U P D -1
C126 C 0.0479(3) 0.1329(4) 0.4380(3) 0.053(2) Uani 0.5 1 d G . P D -1
H12I H 0.0495 0.1943 0.4434 0.064 Uiso 0.5 1 d G U P D -1
C127 C 0.0760(2) 0.0788(4) 0.4829(2) 0.0472(18) Uani 0.5 1 d G . P D -1
H12J H 0.0968 0.1033 0.5190 0.057 Uiso 0.5 1 d G U P D -1
C128 C 0.07355(19) -0.0112(4) 0.4749(2) 0.0393(19) Uani 0.5 1 d G . P D -1
H12K H 0.0928 -0.0481 0.5056 0.047 Uiso 0.5 1 d G U P D -1
C129 C 0.0399(4) -0.1450(4) 0.4127(4) 0.066(4) Uani 0.5 1 d G . P D -1
H12D H 0.0685 -0.1731 0.4402 0.099 Uiso 0.5 1 calc R U P D -1
H12E H 0.0438 -0.1592 0.3669 0.099 Uiso 0.5 1 calc R U P D -1
H12F H 0.0055 -0.1662 0.4249 0.099 Uiso 0.5 1 calc R U P D -1
 
loop_
 _atom_site_aniso_label
 _atom_site_aniso_U_11
 _atom_site_aniso_U_22
 _atom_site_aniso_U_33
 _atom_site_aniso_U_23
 _atom_site_aniso_U_13
 _atom_site_aniso_U_12
Gd1 0.0240(3) 0.0147(2) 0.0277(3) -0.00415(18) 0.0033(2) -0.00828(19)
Gd2 0.0352(4) 0.0284(5) 0.0542(5) -0.0053(3) -0.0295(4) 0.0021(3)
Gd3 0.0521(12) 0.0301(8) 0.0641(11) 0.0310(7) -0.0081(7) 0.0062(7)
Gd4 0.0271(7) 0.0112(6) 0.0151(5) -0.0061(4) 0.0042(4) -0.0011(5)
Gd5 0.0560(9) 0.0235(12) 0.0167(3) 0.0016(3) -0.0125(4) 0.0061(5)
Gd6 0.0330(8) 0.0146(5) 0.0365(8) 0.0094(5) 0.0048(6) 0.0008(5)
Gd7 0.091(3) 0.114(4) 0.139(5) 0.002(4) -0.052(3) -0.048(3)
Gd8 0.069(2) 0.0219(11) 0.127(4) 0.0110(16) 0.036(3) -0.0074(12)
Gd9 0.086(4) 0.129(5) 0.130(4) 0.084(4) -0.040(3) -0.001(3)
Gd10 0.025(2) 0.035(2) 0.028(2) 0.0035(15) 0.0056(15) -0.0121(16)
Gd11 0.084(6) 0.032(4) 0.049(4) 0.009(3) -0.034(4) -0.003(4)
Gd12 0.071(5) 0.039(3) 0.084(4) 0.028(2) 0.001(3) -0.006(3)
N1 0.0197(11) 0.0144(10) 0.0171(11) 0.000 -0.0013(9) 0.000
C1 0.053(4) 0.061(4) 0.068(5) 0.026(4) 0.022(4) -0.016(4)
C2 0.069(5) 0.081(5) 0.075(5) 0.047(4) 0.008(4) -0.020(4)
C3 0.063(4) 0.090(6) 0.042(4) 0.035(4) 0.007(4) -0.009(4)
C4 0.026(3) 0.065(4) 0.031(3) -0.014(3) 0.014(2) -0.004(3)
C5 0.037(2) 0.071(4) 0.035(2) 0.001(3) 0.019(2) 0.007(3)
C6 0.051(3) 0.098(6) 0.030(2) 0.012(3) 0.009(2) -0.008(4)
C7 0.052(4) 0.096(5) 0.026(3) -0.009(3) 0.011(3) -0.011(4)
C8 0.037(3) 0.066(4) 0.038(3) -0.032(3) 0.014(3) -0.010(3)
C9 0.041(3) 0.065(4) 0.045(3) -0.027(3) 0.017(3) -0.009(3)
C10 0.048(4) 0.049(4) 0.074(5) -0.026(4) 0.009(4) -0.005(3)
C11 0.039(4) 0.055(4) 0.087(5) -0.013(4) 0.005(4) 0.012(4)
C12 0.026(3) 0.052(4) 0.067(4) -0.004(4) 0.013(3) 0.015(3)
C13 0.027(3) 0.057(4) 0.045(3) -0.007(3) 0.013(3) 0.000(3)
C14 0.0200(16) 0.042(3) 0.053(3) 0.020(3) 0.0035(17) -0.002(3)
C15 0.028(3) 0.040(3) 0.042(3) 0.008(3) 0.009(3) -0.001(3)
C16 0.041(4) 0.071(4) 0.050(4) 0.014(4) 0.014(3) -0.009(4)
C17 0.075(5) 0.088(6) 0.042(4) 0.035(4) -0.010(4) 0.003(4)
C18 0.067(4) 0.096(6) 0.027(2) 0.013(3) -0.011(3) 0.004(4)
C19 0.053(4) 0.092(5) 0.025(3) -0.012(3) 0.001(3) -0.001(4)
C20 0.048(3) 0.063(4) 0.030(3) -0.030(3) -0.005(2) -0.011(3)
C21 0.043(3) 0.059(4) 0.049(3) -0.037(3) 0.006(3) -0.006(3)
C22 0.051(4) 0.043(3) 0.051(4) -0.013(3) 0.004(3) 0.003(3)
C23 0.037(3) 0.026(3) 0.069(4) -0.021(3) 0.002(3) 0.002(2)
C24 0.049(3) 0.0118(19) 0.067(4) 0.002(2) -0.005(3) 0.000(2)
C25 0.049(4) 0.031(3) 0.083(5) 0.012(3) 0.003(4) 0.001(3)
C26 0.043(4) 0.059(5) 0.099(5) -0.002(5) -0.009(4) 0.009(4)
C27 0.041(3) 0.043(3) 0.061(4) 0.017(3) -0.009(3) 0.008(3)
C28 0.034(3) 0.062(4) 0.058(4) 0.018(4) -0.009(3) 0.007(3)
C29 0.034(3) 0.072(4) 0.045(3) 0.019(3) -0.020(3) -0.012(3)
C30 0.023(2) 0.065(4) 0.052(3) 0.010(3) -0.010(2) -0.012(2)
C31 0.025(3) 0.067(4) 0.055(4) -0.020(3) -0.001(3) -0.025(3)
C32 0.029(3) 0.028(3) 0.058(4) -0.008(3) 0.010(3) -0.013(2)
C33 0.039(3) 0.024(3) 0.090(5) -0.010(3) 0.010(4) -0.013(3)
C34 0.047(4) 0.038(3) 0.091(5) 0.018(4) 0.014(4) -0.017(3)
C35 0.071(5) 0.032(3) 0.103(5) 0.039(4) -0.001(4) -0.012(3)
C36 0.091(5) 0.061(5) 0.104(6) 0.050(4) -0.015(5) 0.006(4)
C37 0.093(6) 0.071(5) 0.095(6) 0.040(5) -0.004(5) -0.001(5)
C38 0.091(5) 0.085(6) 0.077(5) 0.028(5) -0.015(5) 0.019(5)
C39 0.095(5) 0.076(5) 0.085(5) 0.015(5) -0.018(5) 0.037(5)
C40 0.071(5) 0.084(5) 0.072(5) 0.017(4) -0.027(4) 0.039(4)
C41 0.064(4) 0.088(6) 0.044(3) 0.015(4) -0.024(3) 0.015(4)
C42 0.040(3) 0.070(5) 0.045(3) 0.006(4) -0.014(3) -0.001(3)
C43 0.046(3) 0.050(4) 0.036(3) -0.017(3) -0.014(3) -0.018(3)
C44 0.038(3) 0.027(2) 0.050(3) -0.012(3) -0.003(3) -0.014(2)
C45 0.039(3) 0.026(3) 0.063(4) -0.012(3) -0.011(3) -0.009(2)
C46 0.052(4) 0.024(3) 0.059(4) -0.001(3) 0.005(3) -0.014(3)
C47 0.040(3) 0.031(3) 0.063(4) 0.022(3) 0.010(3) -0.003(2)
C48 0.049(3) 0.057(4) 0.046(3) 0.028(3) 0.011(3) -0.012(3)
C49 0.067(4) 0.048(4) 0.062(4) 0.028(3) 0.009(4) -0.007(4)
C50 0.079(5) 0.068(5) 0.041(3) 0.029(4) 0.004(4) -0.001(4)
C51 0.072(4) 0.078(5) 0.044(3) 0.025(4) -0.015(3) 0.010(4)
C52 0.067(5) 0.103(5) 0.028(3) 0.013(4) -0.013(3) -0.002(4)
C53 0.046(3) 0.104(6) 0.037(3) 0.003(3) -0.024(3) -0.009(4)
C54 0.042(4) 0.117(6) 0.031(3) -0.023(4) -0.011(3) -0.015(4)
C55 0.039(3) 0.091(5) 0.054(4) -0.043(4) -0.001(3) -0.024(3)
C56 0.057(4) 0.069(4) 0.091(5) -0.058(4) 0.022(4) -0.020(4)
C57 0.049(4) 0.023(3) 0.122(5) -0.037(3) 0.017(4) -0.019(3)
C58 0.076(5) 0.022(3) 0.132(6) -0.002(4) 0.009(5) -0.013(3)
C59 0.035(3) 0.041(3) 0.056(4) 0.017(3) 0.003(3) -0.013(3)
C60 0.032(3) 0.027(3) 0.053(3) 0.001(2) 0.003(3) -0.013(2)
C61 0.023(2) 0.045(3) 0.055(4) -0.004(3) -0.001(3) -0.002(2)
C62 0.034(3) 0.059(4) 0.069(4) 0.003(4) -0.021(3) 0.014(3)
C63 0.057(4) 0.075(5) 0.099(5) -0.001(5) -0.021(4) 0.038(4)
C64 0.096(6) 0.063(5) 0.108(6) 0.004(5) -0.013(5) 0.043(5)
C65 0.087(5) 0.051(4) 0.116(6) 0.023(5) -0.015(5) 0.032(4)
C66 0.071(5) 0.029(3) 0.121(6) -0.009(4) 0.001(5) 0.020(4)
C67 0.072(5) 0.033(3) 0.131(6) -0.025(4) 0.007(5) 0.000(4)
C68 0.079(5) 0.070(5) 0.098(5) -0.051(4) 0.036(4) 0.001(4)
C69 0.070(4) 0.074(5) 0.084(5) -0.057(4) 0.021(4) -0.027(4)
C70 0.065(4) 0.102(5) 0.044(3) -0.047(4) 0.016(3) -0.019(4)
C71 0.054(4) 0.120(6) 0.035(3) -0.022(4) 0.010(3) -0.017(4)
C72 0.072(4) 0.111(6) 0.025(2) 0.000(3) -0.006(3) 0.001(4)
C73 0.075(5) 0.112(6) 0.025(3) 0.010(3) 0.012(3) -0.012(4)
C74 0.074(5) 0.103(5) 0.044(4) 0.019(4) 0.018(4) -0.008(5)
C75 0.053(4) 0.090(5) 0.044(4) 0.025(4) 0.013(3) -0.010(4)
C76 0.045(3) 0.089(5) 0.044(3) 0.010(4) 0.023(3) 0.001(4)
C77 0.027(3) 0.059(4) 0.052(3) 0.010(3) 0.015(2) -0.003(3)
C78 0.016(2) 0.052(4) 0.057(4) -0.008(3) 0.007(2) -0.001(2)
C79 0.036(3) 0.065(4) 0.088(5) -0.015(4) 0.029(4) 0.010(3)
C80 0.052(4) 0.075(5) 0.102(6) -0.008(5) -0.002(5) 0.029(4)
C81 0.060(4) 0.061(5) 0.110(6) -0.006(5) -0.005(5) 0.039(4)
C82 0.065(5) 0.054(4) 0.115(6) -0.024(5) 0.011(5) 0.020(4)
C83 0.063(4) 0.077(5) 0.089(5) -0.032(4) 0.042(4) 0.002(4)
C84 0.073(5) 0.082(5) 0.081(5) -0.053(4) 0.040(4) 0.002(4)
C85 0.071(5) 0.109(6) 0.057(4) -0.041(4) 0.036(4) -0.010(5)
C86 0.075(4) 0.118(6) 0.049(3) -0.011(4) 0.032(3) -0.009(5)
C87 0.053(3) 0.098(5) 0.047(3) -0.010(5) 0.031(3) -0.003(6)
C88 0.047(4) 0.084(5) 0.081(5) -0.030(4) 0.040(4) -0.003(4)
Ni1 0.01418(17) 0.01167(16) 0.01451(17) 0.000 -0.00135(12) 0.000
N2 0.0163(10) 0.0150(10) 0.0171(10) 0.000 -0.0011(8) 0.000
N3 0.0174(7) 0.0132(7) 0.0160(7) 0.0000(6) -0.0007(6) -0.0002(6)
N4 0.0168(10) 0.0128(10) 0.0169(10) 0.000 -0.0010(8) 0.000
C91 0.0170(9) 0.0208(9) 0.0182(9) 0.0015(7) -0.0024(7) 0.0015(7)
C92 0.0155(8) 0.0167(8) 0.0165(8) 0.0014(7) -0.0013(6) 0.0010(7)
C93 0.0189(9) 0.0158(8) 0.0196(9) 0.0022(7) -0.0020(7) 0.0018(7)
C94 0.0171(8) 0.0140(8) 0.0197(9) 0.0006(7) 0.0003(7) 0.0014(7)
C95 0.0228(10) 0.0138(8) 0.0248(10) 0.0002(7) 0.0014(8) 0.0020(7)
C96 0.0250(10) 0.0141(8) 0.0223(10) -0.0020(7) 0.0000(8) -0.0014(8)
C97 0.0194(9) 0.0137(8) 0.0181(8) -0.0007(7) -0.0011(7) -0.0013(7)
C98 0.0221(9) 0.0149(8) 0.0180(9) -0.0015(7) -0.0029(7) -0.0025(7)
C99 0.0182(9) 0.0165(8) 0.0166(8) -0.0011(7) -0.0020(7) -0.0014(7)
C100 0.0184(9) 0.0203(9) 0.0197(9) -0.0010(8) -0.0038(7) -0.0012(7)
C101 0.0211(10) 0.0261(11) 0.0210(10) 0.0040(8) -0.0045(8) 0.0025(9)
C102 0.0259(12) 0.0331(14) 0.0300(13) 0.0058(11) -0.0014(10) 0.0103(11)
C103 0.0289(12) 0.0153(9) 0.0333(13) 0.0040(9) 0.0002(10) 0.0036(9)
C104 0.0351(15) 0.0273(14) 0.051(2) 0.0017(13) 0.0090(14) 0.0137(12)
C105 0.0341(13) 0.0162(10) 0.0291(12) -0.0044(9) -0.0007(10) -0.0041(9)
C106 0.058(2) 0.0298(15) 0.0385(17) -0.0170(14) 0.0077(16) -0.0052(15)
C107 0.0232(10) 0.0252(11) 0.0231(10) -0.0011(9) -0.0064(8) -0.0045(9)
C108 0.0361(14) 0.0313(13) 0.0207(10) -0.0050(10) -0.0020(10) -0.0065(11)
C109 0.026(2) 0.0145(19) 0.0145(19) 0.000 0.0001(17) 0.000
C110 0.020(3) 0.025(3) 0.015(3) 0.000 0.005(2) 0.000
C111 0.021(2) 0.026(3) 0.021(3) 0.000 0.0011(19) 0.000
C112 0.025(2) 0.022(2) 0.016(2) 0.000 -0.0005(18) 0.000
C113 0.031(5) 0.039(5) 0.021(4) 0.000 0.001(4) 0.000
C114 0.021(2) 0.025(3) 0.015(2) 0.000 0.0029(19) 0.000
C115 0.034(5) 0.031(4) 0.020(3) 0.000 0.003(3) 0.000
C116 0.048(7) 0.034(6) 0.042(7) 0.000 0.003(6) 0.000
C117 0.033(6) 0.033(6) 0.062(10) 0.000 -0.004(7) 0.000
C118 0.041(11) 0.041(9) 0.069(18) 0.000 -0.008(12) 0.000
C119 0.071(11) 0.033(6) 0.044(7) 0.000 0.003(7) 0.000
C120 0.071(12) 0.033(6) 0.047(9) 0.000 -0.030(9) 0.000
C121 0.035(6) 0.026(5) 0.047(9) 0.000 0.001(6) 0.000
C122 0.043(12) 0.021(6) 0.077(18) 0.000 0.036(14) 0.000
C123 0.036(3) 0.057(5) 0.039(4) -0.013(3) 0.010(3) -0.007(3)
C124 0.041(3) 0.104(9) 0.043(4) -0.028(8) 0.001(3) -0.003(9)
C125 0.068(7) 0.108(11) 0.034(4) -0.001(5) 0.004(4) 0.041(7)
C126 0.071(7) 0.050(5) 0.041(5) 0.003(4) 0.016(5) 0.013(5)
C127 0.054(5) 0.042(4) 0.046(4) -0.004(3) 0.005(4) -0.005(4)
C128 0.044(3) 0.042(6) 0.032(2) -0.007(3) -0.001(2) -0.005(3)
C129 0.063(7) 0.076(8) 0.061(8) -0.034(7) 0.021(6) -0.025(6)
 
_geom_special_details
;
 All esds (except the esd in the dihedral angle between two l.s. planes)
 are estimated using the full covariance matrix.  The cell esds are taken
 into account individually in the estimation of esds in distances, angles
 and torsion angles; correlations between esds in cell parameters are only
 used when they are defined by crystal symmetry.  An approximate (isotropic)
 treatment of cell esds is used for estimating esds involving l.s. planes.
;
 
loop_
 _geom_bond_atom_site_label_1
 _geom_bond_atom_site_label_2
 _geom_bond_distance
 _geom_bond_site_symmetry_2
 _geom_bond_publ_flag
Gd1 N1 2.1402(17) . ?
Gd1 C33 2.3655(15) . ?
Gd1 C57 2.4516(16) . ?
Gd1 C34 2.4785(16) . ?
Gd1 C32 2.5781(15) . ?
Gd1 C58 2.6723(19) . ?
Gd1 C35 2.7438(19) . ?
Gd1 C56 2.7465(16) . ?
Gd1 C1 2.7577(16) . ?
Gd1 C15 2.8276(17) . ?
Gd1 C16 2.8938(17) . ?
Gd2 N1 2.216(3) . ?
Gd2 C62 2.3746(13) . ?
Gd2 C42 2.4057(14) . ?
Gd2 C63 2.5022(15) . ?
Gd2 C41 2.5614(16) . ?
Gd2 C43 2.6717(18) . ?
Gd2 C61 2.6916(18) . ?
Gd2 C40 2.7310(17) . ?
Gd2 C80 2.8552(19) . ?
Gd2 C18 2.9146(19) . ?
Gd2 C78 3.006(2) . ?
Gd3 N1 2.181(3) . ?
Gd3 C27 2.407(3) . ?
Gd3 C51 2.443(2) . ?
Gd3 C26 2.502(3) . ?
Gd3 C50 2.522(2) . ?
Gd3 C49 2.624(3) . ?
Gd3 C25 2.642(3) . ?
Gd3 C28 2.742(3) . ?
Gd3 C11 2.808(3) . ?
Gd3 C74 2.878(3) . ?
Gd3 C12 2.893(3) . ?
Gd4 N1 2.234(3) . ?
Gd4 Gd5 3.766(2) . ?
Gd4 Gd6 3.924(4) . ?
Gd5 N1 2.131(3) . ?
Gd5 Gd6 3.777(2) . ?
Gd6 N1 2.2559(17) . ?
Gd7 N1 2.167(5) . ?
Gd7 Gd9 3.682(9) . ?
Gd7 Gd8 3.864(7) . ?
Gd8 N1 2.142(3) . ?
Gd8 Gd9 3.627(8) . ?
Gd9 N1 2.149(6) . ?
Gd10 Gd11 0.990(17) . ?
Gd10 N1 2.166(7) . ?
Gd10 Gd12 3.862(9) . ?
Gd11 N1 2.174(7) . ?
Gd11 Gd12 3.850(9) . ?
Gd12 N1 2.171(6) . ?
C1 C34 1.4004 . ?
C1 C2 1.4232 . ?
C1 C16 1.4490 . ?
C2 C37 1.4082 . ?
C2 C3 1.4297 . ?
C3 C6 1.4091 . ?
C3 C17 1.4196 . ?
C4 C13 1.4533 . ?
C4 C9 1.4659 . ?
C4 C5 1.4776 . ?
C5 C16 1.4470 . ?
C5 C6 1.4596 . ?
C6 C7 1.3919 . ?
C7 C19 1.4559 . ?
C7 C8 1.4593 . ?
C8 C9 1.4191 . ?
C8 C21 1.4295 . ?
C9 C10 1.4541 . ?
C10 C23 1.4154 . ?
C10 C11 1.4381 . ?
C11 C26 1.4311 . ?
C11 C12 1.4356 . ?
C12 C13 1.4145 . ?
C12 C28 1.4165 . ?
C13 C14 1.4070 . ?
C14 C15 1.4552 . ?
C14 C30 1.4627 . ?
C15 C16 1.4202 . ?
C15 C32 1.4327 . ?
C17 C18 1.4231 . ?
C17 C38 1.4586 . ?
C18 C19 1.3970 . ?
C18 C41 1.4154 . ?
C19 C20 1.4417 . ?
C20 C21 1.4211 . ?
C20 C43 1.4224 . ?
C21 C22 1.4188 . ?
C22 C45 1.4333 . ?
C22 C23 1.4341 . ?
C23 C24 1.5089 . ?
C24 C25 1.3917 . ?
C24 C46 1.4757 . ?
C25 C49 1.3852 . ?
C25 C26 1.4403 . ?
C26 C27 1.5027 . ?
C27 C51 1.3780 . ?
C27 C28 1.4578 . ?
C28 C29 1.4314 . ?
C29 C30 1.3774 . ?
C29 C53 1.3967 . ?
C30 C31 1.4348 . ?
C31 C32 1.4248 . ?
C31 C55 1.4250 . ?
C32 C33 1.3932 . ?
C33 C34 1.4135 . ?
C33 C57 1.4329 . ?
C34 C35 1.4956 . ?
C35 C36 1.3944 . ?
C35 C58 1.4486 . ?
C36 C65 1.3820 . ?
C36 C37 1.4296 . ?
C37 C38 1.4621 . ?
C38 C39 1.3828 . ?
C39 C40 1.4024 . ?
C39 C64 1.4358 . ?
C40 C41 1.4566 . ?
C40 C63 1.4934 . ?
C41 C42 1.4595 . ?
C42 C62 1.4319 . ?
C42 C43 1.4354 . ?
C43 C44 1.4625 . ?
C44 C60 1.4228 . ?
C44 C45 1.4501 . ?
C45 C46 1.4670 . ?
C46 C47 1.4327 . ?
C47 C59 1.3804 . ?
C47 C48 1.4346 . ?
C48 C75 1.4098 . ?
C48 C49 1.4654 . ?
C49 C50 1.4687 . ?
C50 C74 1.4072 . ?
C50 C51 1.4315 . ?
C51 C52 1.3785 . ?
C52 C53 1.4454 . ?
C52 C72 1.5039 . ?
C53 C54 1.4535 . ?
C54 C71 1.4347 . ?
C54 C55 1.4494 . ?
C55 C56 1.4670 . ?
C56 C69 1.4227 . ?
C56 C57 1.4446 . ?
C57 C58 1.4494 . ?
C58 C67 1.4285 . ?
C59 C60 1.4319 . ?
C59 C77 1.4517 . ?
C60 C61 1.4326 . ?
C61 C62 1.4102 . ?
C61 C78 1.4232 . ?
C62 C63 1.4306 . ?
C63 C80 1.4108 . ?
C64 C81 1.4274 . ?
C64 C65 1.4748 . ?
C65 C66 1.4352 . ?
C66 C82 1.4371 . ?
C66 C67 1.4412 . ?
C67 C68 1.3828 . ?
C68 C69 1.4367 . ?
C68 C84 1.4538 . ?
C69 C70 1.4338 . ?
C70 C71 1.4012 . ?
C70 C85 1.4369 . ?
C71 C72 1.4194 . ?
C72 C73 1.3812 . ?
C73 C74 1.4303 . ?
C73 C86 1.4451 . ?
C74 C75 1.4198 . ?
C75 C76 1.4059 . ?
C76 C77 1.4010 . ?
C76 C87 1.4541 . ?
C77 C78 1.4367 . ?
C78 C79 1.4051 . ?
C79 C80 1.4462 . ?
C79 C88 1.4594 . ?
C80 C81 1.4353 . ?
C81 C82 1.4559 . ?
C82 C83 1.4166 . ?
C83 C84 1.3975 . ?
C83 C88 1.4536 . ?
C84 C85 1.4549 . ?
C85 C86 1.4181 . ?
C86 C87 1.4630 . ?
C87 C88 1.4684 . ?
Ni1 N2 1.959(3) . ?
Ni1 N3 1.962(2) . ?
Ni1 N4 1.962(3) . ?
N2 C92 1.379(3) . ?
N3 C94 1.374(3) . ?
N3 C97 1.383(3) . ?
N4 C99 1.373(3) . ?
C91 C91 1.357(5) 6 ?
C91 C92 1.441(3) . ?
C91 C101 1.496(3) . ?
C92 C93 1.375(3) . ?
C93 C94 1.382(3) . ?
C94 C95 1.444(3) . ?
C95 C96 1.365(4) . ?
C95 C103 1.497(4) . ?
C96 C97 1.448(3) . ?
C96 C105 1.494(4) . ?
C97 C98 1.376(3) . ?
C98 C99 1.377(3) . ?
C99 C100 1.447(3) . ?
C100 C100 1.362(5) 6 ?
C100 C107 1.498(4) . ?
C101 C102 1.531(4) . ?
C103 C104 1.538(5) . ?
C105 C106 1.529(5) . ?
C107 C108 1.528(4) . ?
C109 C110 1.388(9) . ?
C109 C114 1.405(9) . ?
C109 C115 1.494(12) . ?
C110 C111 1.408(11) . ?
C111 C112 1.383(9) . ?
C112 C113 1.388(17) . ?
C113 C114 1.343(13) . ?
C116 C117 1.36(2) . ?
C116 C122 1.40(3) . ?
C116 C121 1.42(2) . ?
C117 C118 1.44(3) . ?
C118 C119 1.34(4) . ?
C119 C120 1.43(2) . ?
C120 C121 1.29(3) . ?
C123 C124 1.3938 . ?
C123 C128 1.3943 . ?
C123 C129 1.5200 . ?
C124 C125 1.3918 . ?
C125 C126 1.3946 . ?
C126 C127 1.3938 . ?
C127 C128 1.3919 . ?
 
loop_
 _geom_angle_atom_site_label_1
 _geom_angle_atom_site_label_2
 _geom_angle_atom_site_label_3
 _geom_angle
 _geom_angle_site_symmetry_1
 _geom_angle_site_symmetry_3
 _geom_angle_publ_flag
N1 Gd1 C33 164.85(10) . . ?
N1 Gd1 C57 159.70(10) . . ?
C33 Gd1 C57 34.6 . . ?
N1 Gd1 C34 140.96(10) . . ?
C33 Gd1 C34 33.8 . . ?
C57 Gd1 C34 56.7 . . ?
N1 Gd1 C32 135.15(10) . . ?
C33 Gd1 C32 32.4 . . ?
C57 Gd1 C32 58.3 . . ?
C34 Gd1 C32 56.7 . . ?
N1 Gd1 C58 139.41(9) . . ?
C33 Gd1 C58 54.3 . . ?
C57 Gd1 C58 32.5 . . ?
C34 Gd1 C58 54.2 . . ?
C32 Gd1 C58 85.4 . . ?
N1 Gd1 C35 132.15(9) . . ?
C33 Gd1 C35 53.8 . . ?
C57 Gd1 C35 53.7 . . ?
C34 Gd1 C35 32.8 . . ?
C32 Gd1 C35 84.6 . . ?
C58 Gd1 C35 31.0 . . ?
N1 Gd1 C56 131.43(10) . . ?
C33 Gd1 C56 58.6 . . ?
C57 Gd1 C56 31.6 . . ?
C34 Gd1 C56 87.4 . . ?
C32 Gd1 C56 66.3 . . ?
C58 Gd1 C56 55.2 . . ?
C35 Gd1 C56 83.2 . . ?
N1 Gd1 C1 113.08(9) . . ?
C33 Gd1 C1 56.7 . . ?
C57 Gd1 C1 86.2 . . ?
C34 Gd1 C1 30.4 . . ?
C32 Gd1 C1 63.1 . . ?
C58 Gd1 C1 82.6 . . ?
C35 Gd1 C1 54.7 . . ?
C56 Gd1 C1 115.02(5) . . ?
N1 Gd1 C15 109.17(9) . . ?
C33 Gd1 C15 56.0 . . ?
C57 Gd1 C15 87.4 . . ?
C34 Gd1 C15 63.6 . . ?
C32 Gd1 C15 30.3 . . ?
C58 Gd1 C15 109.59(5) . . ?
C35 Gd1 C15 96.3 . . ?
C56 Gd1 C15 95.4 . . ?
C1 Gd1 C15 51.7 . . ?
N1 Gd1 C16 99.64(9) . . ?
C33 Gd1 C16 65.9 . . ?
C57 Gd1 C16 100.4 . . ?
C34 Gd1 C16 54.4 . . ?
C32 Gd1 C16 53.5 . . ?
C58 Gd1 C16 108.59(5) . . ?
C35 Gd1 C16 83.7 . . ?
C56 Gd1 C16 119.18(5) . . ?
C1 Gd1 C16 29.6 . . ?
C15 Gd1 C16 28.7 . . ?
N1 Gd2 C62 156.98(12) . . ?
N1 Gd2 C42 165.44(10) . . ?
C62 Gd2 C42 34.9 . . ?
N1 Gd2 C63 137.96(9) . . ?
C62 Gd2 C63 34.0 . . ?
C42 Gd2 C63 56.4 . . ?
N1 Gd2 C41 144.64(10) . . ?
C62 Gd2 C41 56.4 . . ?
C42 Gd2 C41 34.0 . . ?
C63 Gd2 C41 54.7 . . ?
N1 Gd2 C43 134.42(7) . . ?
C62 Gd2 C43 58.2 . . ?
C42 Gd2 C43 32.3 . . ?
C63 Gd2 C43 87.3 . . ?
C41 Gd2 C43 57.7 . . ?
N1 Gd2 C61 128.32(10) . . ?
C62 Gd2 C61 31.5 . . ?
C42 Gd2 C61 58.3 . . ?
C63 Gd2 C61 56.3 . . ?
C41 Gd2 C61 86.9 . . ?
C43 Gd2 C61 65.2 . . ?
N1 Gd2 C40 133.66(7) . . ?
C62 Gd2 C40 55.3 . . ?
C42 Gd2 C40 54.9 . . ?
C63 Gd2 C40 32.8 . . ?
C41 Gd2 C40 31.7 . . ?
C43 Gd2 C40 85.5 . . ?
C61 Gd2 C40 85.0 . . ?
N1 Gd2 C80 109.59(8) . . ?
C62 Gd2 C80 55.5 . . ?
C42 Gd2 C80 85.0 . . ?
C63 Gd2 C80 29.6 . . ?
C41 Gd2 C80 82.1 . . ?
C43 Gd2 C80 113.6 . . ?
C61 Gd2 C80 61.9 . . ?
C40 Gd2 C80 53.6 . . ?
N1 Gd2 C18 118.16(10) . . ?
C62 Gd2 C18 84.3 . . ?
C42 Gd2 C18 54.9 . . ?
C63 Gd2 C18 81.7 . . ?
C41 Gd2 C18 29.1 . . ?
C43 Gd2 C18 62.9 . . ?
C61 Gd2 C18 112.9 . . ?
C40 Gd2 C18 52.1 . . ?
C80 Gd2 C18 105.61(5) . . ?
N1 Gd2 C78 104.96(10) . . ?
C62 Gd2 C78 52.1 . . ?
C42 Gd2 C78 84.7 . . ?
C63 Gd2 C78 60.0 . . ?
C41 Gd2 C78 107.4 . . ?
C43 Gd2 C78 92.79(5) . . ?
C61 Gd2 C78 28.2 . . ?
C40 Gd2 C78 92.8 . . ?
C80 Gd2 C78 48.9 . . ?
C18 Gd2 C78 136.2 . . ?
N1 Gd3 C27 156.45(16) . . ?
N1 Gd3 C51 151.64(15) . . ?
C27 Gd3 C51 33.0 . . ?
N1 Gd3 C26 144.11(14) . . ?
C27 Gd3 C26 35.6 . . ?
C51 Gd3 C26 62.27(6) . . ?
N1 Gd3 C50 141.57(15) . . ?
C27 Gd3 C50 58.31(5) . . ?
C51 Gd3 C50 33.5 . . ?
C26 Gd3 C50 70.72(6) . . ?
N1 Gd3 C49 137.31(16) . . ?
C27 Gd3 C49 65.84(6) . . ?
C51 Gd3 C49 58.31(5) . . ?
C26 Gd3 C49 55.93(5) . . ?
C50 Gd3 C49 33.1 . . ?
N1 Gd3 C25 136.06(15) . . ?
C27 Gd3 C25 59.26(6) . . ?
C51 Gd3 C25 70.74(6) . . ?
C26 Gd3 C25 32.4 . . ?
C50 Gd3 C25 59.04(6) . . ?
C49 Gd3 C25 30.5 . . ?
N1 Gd3 C28 124.40(14) . . ?
C27 Gd3 C28 32.1 . . ?
C51 Gd3 C28 56.16(6) . . ?
C26 Gd3 C28 52.33(5) . . ?
C50 Gd3 C28 87.75(8) . . ?
C49 Gd3 C28 97.41(8) . . ?
C25 Gd3 C28 83.85(7) . . ?
N1 Gd3 C11 115.57(12) . . ?
C27 Gd3 C11 53.93(5) . . ?
C51 Gd3 C11 86.45(8) . . ?
C26 Gd3 C11 30.6 . . ?
C50 Gd3 C11 101.16(8) . . ?
C49 Gd3 C11 83.75(8) . . ?
C25 Gd3 C11 54.79(5) . . ?
C28 Gd3 C11 49.3 . . ?
N1 Gd3 C74 112.39(13) . . ?
C27 Gd3 C74 85.66(7) . . ?
C51 Gd3 C74 55.2 . . ?
C26 Gd3 C74 99.20(8) . . ?
C50 Gd3 C74 29.3 . . ?
C49 Gd3 C74 50.0 . . ?
C25 Gd3 C74 80.46(7) . . ?
C28 Gd3 C74 110.97(9) . . ?
C11 Gd3 C74 129.77(9) . . ?
N1 Gd3 C12 107.62(12) . . ?
C27 Gd3 C12 52.01(6) . . ?
C51 Gd3 C12 82.60(8) . . ?
C26 Gd3 C12 50.20(5) . . ?
C50 Gd3 C12 110.06(9) . . ?
C49 Gd3 C12 105.87(8) . . ?
C25 Gd3 C12 80.83(7) . . ?
C28 Gd3 C12 29.0 . . ?
C11 Gd3 C12 29.1 . . ?
C74 Gd3 C12 137.44(9) . . ?
N1 Gd4 Gd5 29.57(7) . . ?
N1 Gd4 Gd6 29.23(10) . . ?
Gd5 Gd4 Gd6 58.79(6) . . ?
N1 Gd5 Gd4 31.15(5) . . ?
N1 Gd5 Gd6 31.55(5) . . ?
Gd4 Gd5 Gd6 62.69(8) . . ?
N1 Gd6 Gd5 29.62(8) . . ?
N1 Gd6 Gd4 28.91(10) . . ?
Gd5 Gd6 Gd4 58.52(5) . . ?
N1 Gd7 Gd9 31.3(2) . . ?
N1 Gd7 Gd8 26.11(16) . . ?
Gd9 Gd7 Gd8 57.39(19) . . ?
N1 Gd8 Gd9 32.35(19) . . ?
N1 Gd8 Gd7 26.44(17) . . ?
Gd9 Gd8 Gd7 58.8(2) . . ?
N1 Gd9 Gd8 32.24(18) . . ?
N1 Gd9 Gd7 31.6(2) . . ?
Gd8 Gd9 Gd7 63.82(18) . . ?
Gd11 Gd10 N1 77.2(6) . . ?
Gd11 Gd10 Gd12 82.0(6) . . ?
N1 Gd10 Gd12 27.12(17) . . ?
Gd10 Gd11 N1 76.4(6) . . ?
Gd10 Gd11 Gd12 83.3(6) . . ?
N1 Gd11 Gd12 27.58(18) . . ?
N1 Gd12 Gd11 27.62(19) . . ?
N1 Gd12 Gd10 27.06(18) . . ?
Gd11 Gd12 Gd10 14.7(3) . . ?
Gd8 N1 Gd9 115.4(4) . . ?
Gd8 N1 Gd7 127.5(3) . . ?
Gd9 N1 Gd7 117.1(4) . . ?
C34 C1 C2 113.2 . . ?
C34 C1 C16 121.3 . . ?
C2 C1 C16 119.3 . . ?
C34 C1 Gd1 63.7 . . ?
C2 C1 Gd1 102.9 . . ?
C16 C1 Gd1 80.4 . . ?
C37 C2 C1 125.8 . . ?
C37 C2 C3 109.1 . . ?
C1 C2 C3 118.3 . . ?
C6 C3 C17 124.2 . . ?
C6 C3 C2 122.7 . . ?
C17 C3 C2 107.1 . . ?
C13 C4 C9 119.9 . . ?
C13 C4 C5 118.2 . . ?
C9 C4 C5 118.3 . . ?
C16 C5 C6 115.4 . . ?
C16 C5 C4 121.2 . . ?
C6 C5 C4 120.3 . . ?
C7 C6 C3 115.3 . . ?
C7 C6 C5 118.8 . . ?
C3 C6 C5 120.8 . . ?
C6 C7 C19 122.0 . . ?
C6 C7 C8 122.8 . . ?
C19 C7 C8 106.9 . . ?
C9 C8 C21 126.5 . . ?
C9 C8 C7 119.3 . . ?
C21 C8 C7 107.5 . . ?
C8 C9 C10 113.6 . . ?
C8 C9 C4 120.5 . . ?
C10 C9 C4 120.6 . . ?
C23 C10 C11 116.5 . . ?
C23 C10 C9 121.4 . . ?
C11 C10 C9 117.4 . . ?
C26 C11 C12 107.8 . . ?
C26 C11 C10 122.1 . . ?
C12 C11 C10 121.4 . . ?
C26 C11 Gd3 62.8 . . ?
C12 C11 Gd3 78.72(7) . . ?
C10 C11 Gd3 97.39(6) . . ?
C13 C12 C28 123.1 . . ?
C13 C12 C11 122.0 . . ?
C28 C12 C11 108.4 . . ?
C13 C12 Gd3 101.0 . . ?
C28 C12 Gd3 69.61(6) . . ?
C11 C12 Gd3 72.17(6) . . ?
C14 C13 C12 113.6 . . ?
C14 C13 C4 122.7 . . ?
C12 C13 C4 118.3 . . ?
C13 C14 C15 115.7 . . ?
C13 C14 C30 125.1 . . ?
C15 C14 C30 111.2 . . ?
C16 C15 C32 120.7 . . ?
C16 C15 C14 126.5 . . ?
C32 C15 C14 105.0 . . ?
C16 C15 Gd1 78.2 . . ?
C32 C15 Gd1 65.2 . . ?
C14 C15 Gd1 99.2 . . ?
C15 C16 C5 115.5 . . ?
C15 C16 C1 116.2 . . ?
C5 C16 C1 122.8 . . ?
C15 C16 Gd1 73.1 . . ?
C5 C16 Gd1 104.2 . . ?
C1 C16 Gd1 70.0 . . ?
C3 C17 C18 118.9 . . ?
C3 C17 C38 110.0 . . ?
C18 C17 C38 123.2 . . ?
C19 C18 C41 118.4 . . ?
C19 C18 C17 118.1 . . ?
C41 C18 C17 116.3 . . ?
C19 C18 Gd2 85.2 . . ?
C41 C18 Gd2 61.5 . . ?
C17 C18 Gd2 96.9 . . ?
C18 C19 C20 121.6 . . ?
C18 C19 C7 120.5 . . ?
C20 C19 C7 107.9 . . ?
C21 C20 C43 120.2 . . ?
C21 C20 C19 107.9 . . ?
C43 C20 C19 121.6 . . ?
C22 C21 C20 122.8 . . ?
C22 C21 C8 117.7 . . ?
C20 C21 C8 109.2 . . ?
C21 C22 C45 117.6 . . ?
C21 C22 C23 118.2 . . ?
C45 C22 C23 110.9 . . ?
C10 C23 C22 122.2 . . ?
C10 C23 C24 117.2 . . ?
C22 C23 C24 106.5 . . ?
C25 C24 C46 119.8 . . ?
C25 C24 C23 124.9 . . ?
C46 C24 C23 106.8 . . ?
C49 C25 C24 122.4 . . ?
C49 C25 C26 116.8 . . ?
C24 C25 C26 113.8 . . ?
C49 C25 Gd3 74.04(6) . . ?
C24 C25 Gd3 101.55(6) . . ?
C26 C25 Gd3 68.43(7) . . ?
C11 C26 C25 122.1 . . ?
C11 C26 C27 109.2 . . ?
C25 C26 C27 116.7 . . ?
C11 C26 Gd3 86.64(6) . . ?
C25 C26 Gd3 79.20(8) . . ?
C27 C26 Gd3 68.78(7) . . ?
C51 C27 C28 119.9 . . ?
C51 C27 C26 125.1 . . ?
C28 C27 C26 103.3 . . ?
C51 C27 Gd3 74.93(6) . . ?
C28 C27 Gd3 86.74(7) . . ?
C26 C27 Gd3 75.63(7) . . ?
C12 C28 C29 120.1 . . ?
C12 C28 C27 110.7 . . ?
C29 C28 C27 119.5 . . ?
C12 C28 Gd3 81.43(5) . . ?
C29 C28 Gd3 95.31(6) . . ?
C27 C28 Gd3 61.21(5) . . ?
C30 C29 C53 114.3 . . ?
C30 C29 C28 119.5 . . ?
C53 C29 C28 118.5 . . ?
C29 C30 C31 128.7 . . ?
C29 C30 C14 117.5 . . ?
C31 C30 C14 103.5 . . ?
C32 C31 C55 124.4 . . ?
C32 C31 C30 110.9 . . ?
C55 C31 C30 115.9 . . ?
C32 C31 Gd1 62.7 . . ?
C55 C31 Gd1 79.7 . . ?
C30 C31 Gd1 101.6 . . ?
C33 C32 C31 117.7 . . ?
C33 C32 C15 122.0 . . ?
C31 C32 C15 108.8 . . ?
C33 C32 Gd1 65.4 . . ?
C31 C32 Gd1 87.9 . . ?
C15 C32 Gd1 84.5 . . ?
C32 C33 C34 117.6 . . ?
C32 C33 C57 120.3 . . ?
C34 C33 C57 110.7 . . ?
C32 C33 Gd1 82.2 . . ?
C34 C33 Gd1 77.5 . . ?
C57 C33 Gd1 76.0 . . ?
C1 C34 C33 121.6 . . ?
C1 C34 C35 121.7 . . ?
C33 C34 C35 106.9 . . ?
C1 C34 Gd1 85.9 . . ?
C33 C34 Gd1 68.7 . . ?
C35 C34 Gd1 83.4 . . ?
C36 C35 C58 124.9 . . ?
C36 C35 C34 120.8 . . ?
C58 C35 C34 106.1 . . ?
C36 C35 Gd1 103.3 . . ?
C58 C35 Gd1 71.8 . . ?
C34 C35 Gd1 63.8 . . ?
C65 C36 C35 117.3 . . ?
C65 C36 C37 118.6 . . ?
C35 C36 C37 116.8 . . ?
C2 C37 C36 119.5 . . ?
C2 C37 C38 109.2 . . ?
C36 C37 C38 118.0 . . ?
C39 C38 C17 118.5 . . ?
C39 C38 C37 124.7 . . ?
C17 C38 C37 104.4 . . ?
C38 C39 C40 119.2 . . ?
C38 C39 C64 116.6 . . ?
C40 C39 C64 115.1 . . ?
C39 C40 C41 122.0 . . ?
C39 C40 C63 123.3 . . ?
C41 C40 C63 104.1 . . ?
C39 C40 Gd2 102.0 . . ?
C41 C40 Gd2 67.7 . . ?
C63 C40 Gd2 65.2 . . ?
C18 C41 C40 119.8 . . ?
C18 C41 C42 120.3 . . ?
C40 C41 C42 109.8 . . ?
C18 C41 Gd2 89.5 . . ?
C40 C41 Gd2 80.6 . . ?
C42 C41 Gd2 67.1 . . ?
C62 C42 C43 118.8 . . ?
C62 C42 C41 107.8 . . ?
C43 C42 C41 121.4 . . ?
C62 C42 Gd2 71.4 . . ?
C43 C42 Gd2 84.1 . . ?
C41 C42 Gd2 78.86(5) . . ?
C20 C43 C42 116.1 . . ?
C20 C43 C44 118.2 . . ?
C42 C43 C44 118.7 . . ?
C20 C43 Gd2 92.0 . . ?
C42 C43 Gd2 63.6 . . ?
C44 C43 Gd2 88.3 . . ?
C60 C44 C45 113.6 . . ?
C60 C44 C43 120.2 . . ?
C45 C44 C43 119.9 . . ?
C60 C44 Gd2 76.9 . . ?
C45 C44 Gd2 108.6 . . ?
C43 C44 Gd2 62.6 . . ?
C22 C45 C44 120.6 . . ?
C22 C45 C46 107.8 . . ?
C44 C45 C46 121.1 . . ?
C47 C46 C45 121.8 . . ?
C47 C46 C24 119.3 . . ?
C45 C46 C24 107.8 . . ?
C59 C47 C46 116.2 . . ?
C59 C47 C48 119.3 . . ?
C46 C47 C48 118.1 . . ?
C75 C48 C47 119.7 . . ?
C75 C48 C49 109.8 . . ?
C47 C48 C49 121.3 . . ?
C25 C49 C48 118.5 . . ?
C25 C49 C50 126.3 . . ?
C48 C49 C50 104.1 . . ?
C25 C49 Gd3 75.47(6) . . ?
C48 C49 Gd3 94.78(6) . . ?
C50 C49 Gd3 69.63(6) . . ?
C74 C50 C51 122.9 . . ?
C74 C50 C49 108.8 . . ?
C51 C50 C49 117.1 . . ?
C74 C50 Gd3 89.51(6) . . ?
C51 C50 Gd3 70.25(7) . . ?
C49 C50 Gd3 77.29(7) . . ?
C27 C51 C52 120.3 . . ?
C27 C51 C50 117.6 . . ?
C52 C51 C50 114.4 . . ?
C27 C51 Gd3 72.07(6) . . ?
C52 C51 Gd3 94.47(7) . . ?
C50 C51 Gd3 76.29(7) . . ?
C51 C52 C53 120.9 . . ?
C51 C52 C72 121.8 . . ?
C53 C52 C72 108.5 . . ?
C51 C52 Gd3 57.22(5) . . ?
C53 C52 Gd3 92.82(6) . . ?
C72 C52 Gd3 93.99(5) . . ?
C29 C53 C52 120.1 . . ?
C29 C53 C54 122.5 . . ?
C52 C53 C54 107.0 . . ?
C71 C54 C55 122.1 . . ?
C71 C54 C53 107.9 . . ?
C55 C54 C53 119.8 . . ?
C31 C55 C54 118.5 . . ?
C31 C55 C56 117.6 . . ?
C54 C55 C56 118.0 . . ?
C31 C55 Gd1 72.4 . . ?
C54 C55 Gd1 109.4 . . ?
C56 C55 Gd1 66.0 . . ?
C69 C56 C57 117.4 . . ?
C69 C56 C55 117.9 . . ?
C57 C56 C55 116.9 . . ?
C69 C56 Gd1 94.6 . . ?
C57 C56 Gd1 62.9 . . ?
C55 C56 Gd1 84.8 . . ?
C33 C57 C56 122.5 . . ?
C33 C57 C58 106.8 . . ?
C56 C57 C58 120.3 . . ?
C33 C57 Gd1 69.4 . . ?
C56 C57 Gd1 85.5 . . ?
C58 C57 Gd1 82.2 . . ?
C67 C58 C35 118.2 . . ?
C67 C58 C57 121.2 . . ?
C35 C58 C57 109.1 . . ?
C67 C58 Gd1 92.6 . . ?
C35 C58 Gd1 77.2 . . ?
C57 C58 Gd1 65.3 . . ?
C47 C59 C60 122.4 . . ?
C47 C59 C77 119.5 . . ?
C60 C59 C77 107.6 . . ?
C44 C60 C59 124.0 . . ?
C44 C60 C61 120.6 . . ?
C59 C60 C61 105.2 . . ?
C44 C60 Gd2 75.8 . . ?
C59 C60 Gd2 101.2 . . ?
C61 C60 Gd2 63.0 . . ?
C62 C61 C78 118.3 . . ?
C62 C61 C60 118.5 . . ?
C78 C61 C60 112.7 . . ?
C62 C61 Gd2 61.7 . . ?
C78 C61 Gd2 88.3 . . ?
C60 C61 Gd2 88.7 . . ?
C61 C62 C63 119.5 . . ?
C61 C62 C42 122.8 . . ?
C63 C62 C42 108.2 . . ?
C61 C62 Gd2 86.7 . . ?
C63 C62 Gd2 77.90(5) . . ?
C42 C62 Gd2 73.8 . . ?
C80 C63 C62 121.1 . . ?
C80 C63 C40 120.3 . . ?
C62 C63 C40 109.7 . . ?
C80 C63 Gd2 89.2 . . ?
C62 C63 Gd2 68.1 . . ?
C40 C63 Gd2 82.1 . . ?
C81 C64 C39 120.7 . . ?
C81 C64 C65 109.8 . . ?
C39 C64 C65 119.2 . . ?
C36 C65 C66 119.2 . . ?
C36 C65 C64 122.5 . . ?
C66 C65 C64 105.1 . . ?
C65 C66 C82 110.1 . . ?
C65 C66 C67 124.5 . . ?
C82 C66 C67 116.1 . . ?
C68 C67 C58 117.0 . . ?
C68 C67 C66 120.7 . . ?
C58 C67 C66 114.9 . . ?
C67 C68 C69 123.7 . . ?
C67 C68 C84 119.0 . . ?
C69 C68 C84 108.5 . . ?
C56 C69 C70 122.0 . . ?
C56 C69 C68 120.0 . . ?
C70 C69 C68 108.7 . . ?
C71 C70 C69 120.7 . . ?
C71 C70 C85 122.2 . . ?
C69 C70 C85 106.9 . . ?
C70 C71 C72 115.9 . . ?
C70 C71 C54 118.3 . . ?
C72 C71 C54 110.9 . . ?
C73 C72 C71 122.4 . . ?
C73 C72 C52 121.3 . . ?
C71 C72 C52 104.9 . . ?
C72 C73 C74 114.4 . . ?
C72 C73 C86 122.9 . . ?
C74 C73 C86 116.8 . . ?
C50 C74 C75 109.4 . . ?
C50 C74 C73 122.5 . . ?
C75 C74 C73 121.0 . . ?
C50 C74 Gd3 61.2 . . ?
C75 C74 Gd3 89.90(7) . . ?
C73 C74 Gd3 91.80(6) . . ?
C76 C75 C48 121.3 . . ?
C76 C75 C74 122.4 . . ?
C48 C75 C74 107.6 . . ?
C77 C76 C75 118.0 . . ?
C77 C76 C87 117.5 . . ?
C75 C76 C87 119.5 . . ?
C76 C77 C78 123.1 . . ?
C76 C77 C59 120.9 . . ?
C78 C77 C59 109.9 . . ?
C79 C78 C61 123.5 . . ?
C79 C78 C77 121.1 . . ?
C61 C78 C77 104.0 . . ?
C79 C78 Gd2 77.4 . . ?
C61 C78 Gd2 63.5 . . ?
C77 C78 Gd2 97.9 . . ?
C78 C79 C80 116.7 . . ?
C78 C79 C88 117.6 . . ?
C80 C79 C88 121.5 . . ?
C78 C79 Gd2 75.7 . . ?
C80 C79 Gd2 69.2 . . ?
C88 C79 Gd2 105.5 . . ?
C63 C80 C81 114.5 . . ?
C63 C80 C79 119.9 . . ?
C81 C80 C79 119.4 . . ?
C63 C80 Gd2 61.2 . . ?
C81 C80 Gd2 102.4 . . ?
C79 C80 Gd2 82.5 . . ?
C64 C81 C80 124.6 . . ?
C64 C81 C82 107.1 . . ?
C80 C81 C82 119.7 . . ?
C83 C82 C66 125.3 . . ?
C83 C82 C81 120.4 . . ?
C66 C82 C81 107.5 . . ?
C84 C83 C82 113.8 . . ?
C84 C83 C88 120.8 . . ?
C82 C83 C88 121.6 . . ?
C83 C84 C68 123.4 . . ?
C83 C84 C85 120.9 . . ?
C68 C84 C85 105.8 . . ?
C86 C85 C70 121.7 . . ?
C86 C85 C84 120.5 . . ?
C70 C85 C84 109.5 . . ?
C85 C86 C73 114.2 . . ?
C85 C86 C87 119.0 . . ?
C73 C86 C87 122.7 . . ?
C76 C87 C86 117.0 . . ?
C76 C87 C88 119.7 . . ?
C86 C87 C88 120.3 . . ?
C83 C88 C79 117.2 . . ?
C83 C88 C87 118.2 . . ?
C79 C88 C87 120.5 . . ?
N2 Ni1 N3 89.91(6) . . ?
N3 Ni1 N3 177.80(12) 6 . ?
N2 Ni1 N4 178.40(12) . . ?
N3 Ni1 N4 90.06(6) . . ?
C92 N2 C92 104.0(3) 6 . ?
C92 N2 Ni1 127.97(13) . . ?
C94 N3 C97 104.06(19) . . ?
C94 N3 Ni1 128.16(16) . . ?
C97 N3 Ni1 127.78(16) . . ?
C99 N4 C99 104.6(3) . 6 ?
C99 N4 Ni1 127.68(13) . . ?
C91 C91 C92 106.46(14) 6 . ?
C91 C91 C101 128.60(15) 6 . ?
C92 C91 C101 124.7(2) . . ?
C93 C92 N2 125.0(2) . . ?
C93 C92 C91 123.4(2) . . ?
N2 C92 C91 111.5(2) . . ?
C92 C93 C94 124.1(2) . . ?
N3 C94 C93 124.8(2) . . ?
N3 C94 C95 112.0(2) . . ?
C93 C94 C95 123.2(2) . . ?
C96 C95 C94 106.2(2) . . ?
C96 C95 C103 128.9(2) . . ?
C94 C95 C103 124.9(2) . . ?
C95 C96 C97 106.2(2) . . ?
C95 C96 C105 129.0(2) . . ?
C97 C96 C105 124.7(2) . . ?
C98 C97 N3 125.1(2) . . ?
C98 C97 C96 123.5(2) . . ?
N3 C97 C96 111.5(2) . . ?
C97 C98 C99 123.8(2) . . ?
N4 C99 C98 125.6(2) . . ?
N4 C99 C100 111.4(2) . . ?
C98 C99 C100 123.0(2) . . ?
C100 C100 C99 106.29(14) 6 . ?
C100 C100 C107 128.50(15) 6 . ?
C99 C100 C107 125.1(2) . . ?
C91 C101 C102 111.6(2) . . ?
C95 C103 C104 113.1(3) . . ?
C96 C105 C106 113.4(3) . . ?
C100 C107 C108 113.2(2) . . ?
C110 C109 C114 118.5(6) . . ?
C110 C109 C115 120.5(8) . . ?
C114 C109 C115 121.0(8) . . ?
C109 C110 C111 120.5(6) . . ?
C112 C111 C110 120.0(6) . . ?
C111 C112 C113 118.0(8) . . ?
C114 C113 C112 123.1(14) . . ?
C113 C114 C109 120.0(10) . . ?
C117 C116 C122 117(2) . . ?
C117 C116 C121 117.6(16) . . ?
C122 C116 C121 125.0(19) . . ?
C116 C117 C118 119.1(18) . . ?
C119 C118 C117 121(2) . . ?
C118 C119 C120 118(2) . . ?
C121 C120 C119 121(2) . . ?
C120 C121 C116 123.2(17) . . ?
C124 C123 C128 120.1 . . ?
C124 C123 C129 119.2 . . ?
C128 C123 C129 120.7 . . ?
C125 C124 C123 119.9 . . ?
C124 C125 C126 120.0 . . ?
C127 C126 C125 120.1 . . ?
C128 C127 C126 119.9 . . ?
C127 C128 C123 120.0 . . ?
 
_refine_diff_density_max    2.394
_refine_diff_density_min   -3.061
_refine_diff_density_rms    0.168

_shelx_res_file
;

    kbg239.res created by SHELXL-2014/7


TITL kbg239 in C2/m
CELL 0.77490  25.2389  15.3624  20.5877  90.0000  94.5991  90.0000
ZERR    4.00   0.0016   0.0009   0.0012   0.0000   0.0026   0.0000
LATT  7
SYMM -X, Y, -Z
SFAC C H N NI GD
DISP GD  -0.1004 4.5392 20406.6
DISP Ni 0.3262 1.3024 5778.6
DISP N 0.0076 0.0040 23.9
DISP C 0.0040 0.0020 13.6
DISP H 0.0000 0.0000 0.7
UNIT 552 240 20 4 12
TEMP -173
SIZE 0.22 0.19 0.06 !black block

L.S. 24
ACTA
SIMU 0.009 C1 > C88
ISOR 0.007 Gd4 > Gd9 Gd11 Gd12
ISOR 0.002 Gd10
SUMP 1.5000000 .000001 3 2 3 3 3 4 1 5 1 6 1 7

WGHT    0.135600   52.508999
FVAR       0.02949   0.23138   0.15252   0.08018   0.02275   0.03616   0.04881
PART   1
GD1   5    0.355809    0.116521    0.322522    21.00000    0.02402    0.01465 =
         0.02772   -0.00415    0.00333   -0.00828
GD2   5    0.239438   -0.018594    0.239999    21.00000    0.03524    0.02842 =
         0.05415   -0.00533   -0.02950    0.00206
GD3   5    0.344841   -0.104061    0.371736    21.00000    0.05213    0.03010 =
         0.06409    0.03102   -0.00805    0.00616
PART   2
GD4   5    0.334649    0.117718    0.368781    31.00000    0.02714    0.01125 =
         0.01507   -0.00609    0.00425   -0.00105
GD5   5    0.267680    0.016085    0.217233    31.00000    0.05597    0.02346 =
         0.01671    0.00164   -0.01247    0.00611
GD6   5    0.324629   -0.135946    0.349094    31.00000    0.03295    0.01461 =
         0.03647    0.00943    0.00476    0.00075
PART   3
GD7   5    0.241592   -0.069438    0.265191    41.00000    0.09134    0.11351 =
         0.13862    0.00206   -0.05168   -0.04846
GD8   5    0.329568    0.134146    0.298066    41.00000    0.06931    0.02190 =
         0.12742    0.01103    0.03636   -0.00742
GD9   5    0.363402   -0.072221    0.376309    41.00000    0.08594    0.12929 =
         0.13050    0.08410   -0.03955   -0.00122
PART   4
GD10  5    0.298472    0.035591    0.208482    51.00000    0.02483    0.03508 =
         0.02847    0.00353    0.00558   -0.01209
GD11  5    0.264018    0.051615    0.224995    61.00000    0.08369    0.03236 =
         0.04914    0.00894   -0.03444   -0.00283
GD12  5    0.300037   -0.129556    0.350038    71.00000    0.07055    0.03859 =
         0.08372    0.02769    0.00096   -0.00603
PART   0
N1    3    0.309583    0.000000    0.310491    10.50000    0.01972    0.01444 =
         0.01713    0.00000   -0.00134    0.00000
AFIX   6
PART  -1
C1    1    0.395450    0.172089    0.208619    10.50000    0.05269    0.06102 =
         0.06803    0.02603    0.02170   -0.01622
C2    1    0.349650    0.172029    0.163540    10.50000    0.06903    0.08141 =
         0.07506    0.04689    0.00843   -0.01954
C3    1    0.335470    0.092889    0.129979    10.50000    0.06335    0.09038 =
         0.04243    0.03454    0.00657   -0.00867
C4    1    0.423520   -0.073251    0.222119    10.50000    0.02640    0.06465 =
         0.03138   -0.01425    0.01400   -0.00412
C5    1    0.409180    0.010359    0.189859    10.50000    0.03730    0.07092 =
         0.03524    0.00127    0.01936    0.00677
C6    1    0.364460    0.015069    0.140429    10.50000    0.05077    0.09781 =
         0.02966    0.01171    0.00905   -0.00764
C7    1    0.336739   -0.060861    0.123099    10.50000    0.05247    0.09631 =
         0.02566   -0.00947    0.01130   -0.01109
C8    1    0.348859   -0.144531    0.154409    10.50000    0.03695    0.06641 =
         0.03845   -0.03164    0.01368   -0.00954
C9    1    0.391589   -0.150291    0.203399    10.50000    0.04139    0.06506 =
         0.04504   -0.02743    0.01654   -0.00889
C10   1    0.385719   -0.220471    0.249669    10.50000    0.04825    0.04859 =
         0.07367   -0.02630    0.00938   -0.00541
C11   1    0.415429   -0.214011    0.312069    10.50000    0.03868    0.05530 =
         0.08687   -0.01261    0.00515    0.01163
C12   1    0.448900   -0.140451    0.328659    10.50000    0.02581    0.05217 =
         0.06686   -0.00366    0.01323    0.01534
C13   1    0.454530   -0.070921    0.284699    10.50000    0.02717    0.05715 =
         0.04533   -0.00659    0.01330   -0.00024
C14   1    0.471480    0.007279    0.315289    10.50000    0.02002    0.04177 =
         0.05306    0.02037    0.00351   -0.00162
C15   1    0.457710    0.086539    0.279079    10.50000    0.02775    0.03960 =
         0.04176    0.00807    0.00895   -0.00091
C16   1    0.425750    0.092529    0.219249    10.50000    0.04109    0.07097 =
         0.04960    0.01384    0.01370   -0.00877
C17   1    0.279980    0.096590    0.112310    10.50000    0.07515    0.08776 =
         0.04192    0.03495   -0.01037    0.00251
C18   1    0.251190    0.017340    0.102890    10.50000    0.06661    0.09628 =
         0.02673    0.01269   -0.01088    0.00442
C19   1    0.279949   -0.060410    0.103910    10.50000    0.05345    0.09217 =
         0.02500   -0.01192    0.00106   -0.00077
C20   1    0.257929   -0.140760    0.125929    10.50000    0.04754    0.06313 =
         0.03000   -0.03008   -0.00534   -0.01087
C21   1    0.300789   -0.194110    0.151039    10.50000    0.04337    0.05889 =
         0.04906   -0.03653    0.00563   -0.00558
C22   1    0.295289   -0.258040    0.199779    10.50000    0.05096    0.04263 =
         0.05096   -0.01282    0.00411    0.00284
C23   1    0.339439   -0.272811    0.246779    10.50000    0.03678    0.02593 =
         0.06870   -0.02105    0.00151    0.00198
C24   1    0.316229   -0.292951    0.310389    10.50000    0.04919    0.01178 =
         0.06691    0.00153   -0.00510    0.00006
C25   1    0.341099   -0.275951    0.371869    10.50000    0.04871    0.03052 =
         0.08315    0.01153    0.00261    0.00135
C26   1    0.394799   -0.244631    0.370659    10.50000    0.04298    0.05914 =
         0.09910   -0.00188   -0.00899    0.00852
C27   1    0.415440   -0.188081    0.426639    10.50000    0.04065    0.04270 =
         0.06067    0.01748   -0.00916    0.00839
C28   1    0.452060   -0.129391    0.397169    10.50000    0.03406    0.06238 =
         0.05795    0.01813   -0.00943    0.00710
C29   1    0.462330   -0.045131    0.425079    10.50000    0.03407    0.07213 =
         0.04452    0.01888   -0.01992   -0.01208
C30   1    0.474800    0.022999    0.385569    10.50000    0.02288    0.06466 =
         0.05235    0.00952   -0.01041   -0.01171
C31   1    0.460970    0.113229    0.390399    10.50000    0.02530    0.06684 =
         0.05511   -0.02040   -0.00063   -0.02466
C32   1    0.455770    0.152959    0.327679    10.50000    0.02933    0.02766 =
         0.05839   -0.00775    0.01041   -0.01271
C33   1    0.422200    0.224739    0.319089    10.50000    0.03855    0.02442 =
         0.09017   -0.00954    0.01048   -0.01300
C34   1    0.393160    0.234479    0.257909    10.50000    0.04685    0.03816 =
         0.09134    0.01807    0.01430   -0.01736
C35   1    0.342470    0.279939    0.269960    10.50000    0.07119    0.03206 =
         0.10325    0.03901   -0.00125   -0.01190
C36   1    0.297460    0.271040    0.226570    10.50000    0.09139    0.06074 =
         0.10393    0.04991   -0.01522    0.00591
C37   1    0.303600    0.222620    0.168350    10.50000    0.09343    0.07072 =
         0.09466    0.04018   -0.00424   -0.00082
C38   1    0.257510    0.174960    0.139180    10.50000    0.09095    0.08473 =
         0.07714    0.02759   -0.01480    0.01917
C39   1    0.209120    0.168820    0.165950    10.50000    0.09541    0.07558 =
         0.08544    0.01533   -0.01831    0.03654
C40   1    0.180100    0.091070    0.159050    10.50000    0.07135    0.08425 =
         0.07172    0.01697   -0.02652    0.03932
C41   1    0.199400    0.016080    0.124640    10.50000    0.06373    0.08823 =
         0.04431    0.01470   -0.02413    0.01506
C42   1    0.178160   -0.063780    0.150850    10.50000    0.04042    0.07015 =
         0.04481    0.00597   -0.01364   -0.00080
C43   1    0.208469   -0.142940    0.154500    10.50000    0.04611    0.04999 =
         0.03580   -0.01700   -0.01383   -0.01753
C44   1    0.203159   -0.201580    0.209560    10.50000    0.03815    0.02690 =
         0.04969   -0.01191   -0.00263   -0.01418
C45   1    0.246059   -0.260800    0.229919    10.50000    0.03928    0.02565 =
         0.06323   -0.01190   -0.01057   -0.00943
C46   1    0.258089   -0.282880    0.298849    10.50000    0.05249    0.02440 =
         0.05898   -0.00074    0.00489   -0.01357
C47   1    0.228739   -0.246340    0.349000    10.50000    0.04036    0.03084 =
         0.06346    0.02168    0.00954   -0.00295
C48   1    0.256469   -0.230010    0.411379    10.50000    0.04904    0.05743 =
         0.04552    0.02791    0.01077   -0.01206
C49   1    0.313259   -0.249231    0.423649    10.50000    0.06685    0.04785 =
         0.06198    0.02777    0.00881   -0.00679
C50   1    0.331800   -0.187271    0.474849    10.50000    0.07921    0.06754 =
         0.04066    0.02865    0.00350   -0.00141
C51   1    0.385770   -0.158421    0.475449    10.50000    0.07179    0.07784 =
         0.04360    0.02475   -0.01541    0.00978
C52   1    0.394830   -0.076761    0.501789    10.50000    0.06657    0.10332 =
         0.02828    0.01317   -0.01322   -0.00207
C53   1    0.435240   -0.020551    0.478719    10.50000    0.04581    0.10363 =
         0.03696    0.00312   -0.02406   -0.00864
C54   1    0.418490    0.068549    0.489119    10.50000    0.04226    0.11717 =
         0.03120   -0.02313   -0.01075   -0.01544
C55   1    0.429850    0.135619    0.442709    10.50000    0.03946    0.09092 =
         0.05358   -0.04262   -0.00112   -0.02358
C56   1    0.391810    0.207419    0.432179    10.50000    0.05661    0.06853 =
         0.09077   -0.05804    0.02198   -0.02040
C57   1    0.391220    0.252649    0.370610    10.50000    0.04941    0.02322 =
         0.12185   -0.03732    0.01657   -0.01855
C58   1    0.341880    0.287099    0.340060    10.50000    0.07593    0.02228 =
         0.13226   -0.00231    0.00896   -0.01297
C59   1    0.185839   -0.194820    0.328369    10.50000    0.03469    0.04122 =
         0.05585    0.01726    0.00347   -0.01312
C60   1    0.171799   -0.176810    0.260940    10.50000    0.03216    0.02732 =
         0.05258    0.00139    0.00300   -0.01306
C61   1    0.145830   -0.093849    0.260040    10.50000    0.02301    0.04521 =
         0.05529   -0.00385   -0.00078   -0.00229
C62   1    0.148520   -0.040430    0.204700    10.50000    0.03417    0.05871 =
         0.06899    0.00320   -0.02075    0.01372
C63   1    0.151160    0.052050    0.212450    10.50000    0.05692    0.07475 =
         0.09896   -0.00120   -0.02138    0.03837
C64   1    0.204300    0.214610    0.225990    10.50000    0.09632    0.06285 =
         0.10764    0.00445   -0.01334    0.04294
C65   1    0.248680    0.269770    0.252630    10.50000    0.08725    0.05136 =
         0.11576    0.02349   -0.01459    0.03232
C66   1    0.246890    0.265490    0.322060    10.50000    0.07126    0.02935 =
         0.12096   -0.00887    0.00116    0.02044
C67   1    0.292590    0.274110    0.368270    10.50000    0.07180    0.03279 =
         0.13086   -0.02537    0.00687    0.00049
C68   1    0.294580    0.231779    0.427690    10.50000    0.07860    0.07008 =
         0.09802   -0.05113    0.03641    0.00129
C69   1    0.342950    0.201539    0.461890    10.50000    0.06994    0.07426 =
         0.08424   -0.05701    0.02070   -0.02707
C70   1    0.330800    0.129129    0.502050    10.50000    0.06486    0.10202 =
         0.04365   -0.04670    0.01648   -0.01881
C71   1    0.369260    0.065709    0.519389    10.50000    0.05377    0.12016 =
         0.03459   -0.02184    0.00978   -0.01700
C72   1    0.350330   -0.021031    0.522899    10.50000    0.07166    0.11126 =
         0.02479   -0.00037   -0.00554    0.00069
C73   1    0.297790   -0.042821    0.507040    10.50000    0.07496    0.11168 =
         0.02538    0.00961    0.01224   -0.01236
C74   1    0.289590   -0.131271    0.486989    10.50000    0.07353    0.10295 =
         0.04392    0.01932    0.01792   -0.00824
C75   1    0.243360   -0.156260    0.447559    10.50000    0.05294    0.09016 =
         0.04378    0.02468    0.01294   -0.00961
C76   1    0.205470   -0.095480    0.422320    10.50000    0.04453    0.08894 =
         0.04417    0.00989    0.02320    0.00149
C77   1    0.174530   -0.117250    0.365080    10.50000    0.02663    0.05886 =
         0.05154    0.01020    0.01502   -0.00297
C78   1    0.148680   -0.053480    0.322440    10.50000    0.01571    0.05154 =
         0.05656   -0.00778    0.00677   -0.00105
C79   1    0.157940    0.035910    0.332320    10.50000    0.03611    0.06480 =
         0.08807   -0.01541    0.02862    0.01048
C80   1    0.154620    0.090460    0.274890    10.50000    0.05170    0.07545 =
         0.10185   -0.00754   -0.00211    0.02858
C81   1    0.178980    0.174940    0.278030    10.50000    0.05950    0.06120 =
         0.11019   -0.00605   -0.00531    0.03891
C82   1    0.207180    0.204080    0.338600    10.50000    0.06486    0.05438 =
         0.11502   -0.02366    0.01145    0.01961
C83   1    0.210870    0.149470    0.394220    10.50000    0.06305    0.07660 =
         0.08937   -0.03230    0.04240    0.00154
C84   1    0.252040    0.171980    0.440630    10.50000    0.07286    0.08180 =
         0.08116   -0.05341    0.04002    0.00215
C85   1    0.276010    0.107330    0.485520    10.50000    0.07122    0.10891 =
         0.05688   -0.04131    0.03614   -0.01013
C86   1    0.258280    0.019720    0.482700    10.50000    0.07536    0.11832 =
         0.04877   -0.01086    0.03177   -0.00917
C87   1    0.213210   -0.003510    0.436840    10.50000    0.05293    0.09842 =
         0.04749   -0.01017    0.03103   -0.00343
C88   1    0.188570    0.062180    0.392250    10.50000    0.04739    0.08373 =
         0.08057   -0.03040    0.03971   -0.00324
AFIX   0
PART   0
NI1   4    0.480531    0.000000    0.081315    10.50000    0.01418    0.01167 =
         0.01451    0.00000   -0.00135    0.00000
N2    3    0.423601    0.000000    0.010817    10.50000    0.01632    0.01498 =
         0.01708    0.00000   -0.00113    0.00000
N3    3    0.479425    0.127678    0.082445    11.00000    0.01735    0.01320 =
         0.01603    0.00003   -0.00065   -0.00023
N4    3    0.536057    0.000000    0.153710    10.50000    0.01679    0.01276 =
         0.01693    0.00000   -0.00100    0.00000
C91   1    0.355797    0.044169   -0.065674    11.00000    0.01698    0.02076 =
         0.01818    0.00151   -0.00237    0.00146
C92   1    0.398038    0.070742   -0.018635    11.00000    0.01547    0.01674 =
         0.01652    0.00137   -0.00132    0.00102
C93   1    0.409737    0.156356   -0.004158    11.00000    0.01892    0.01579 =
         0.01957    0.00225   -0.00197    0.00177
AFIX  43
H93   2    0.390409    0.200047   -0.028609    11.00000   -1.20000
AFIX   0
C94   1    0.447843    0.182816    0.043721    11.00000    0.01709    0.01403 =
         0.01970    0.00060    0.00032    0.00138
C95   1    0.458521    0.273147    0.059233    11.00000    0.02277    0.01384 =
         0.02479    0.00020    0.00135    0.00204
C96   1    0.498113    0.273355    0.108453    11.00000    0.02496    0.01411 =
         0.02231   -0.00202   -0.00001   -0.00140
C97   1    0.510766    0.182926    0.122212    11.00000    0.01942    0.01368 =
         0.01812   -0.00075   -0.00115   -0.00127
C98   1    0.548704    0.156609    0.169919    11.00000    0.02212    0.01492 =
         0.01804   -0.00153   -0.00285   -0.00247
AFIX  43
H98   2    0.568514    0.200189    0.193907    11.00000   -1.20000
AFIX   0
C99   1    0.559614    0.070757    0.184902    11.00000    0.01816    0.01654 =
         0.01655   -0.00110   -0.00205   -0.00141
C100  1    0.597671    0.044343    0.237510    11.00000    0.01836    0.02030 =
         0.01975   -0.00102   -0.00384   -0.00125
C101  1    0.317588    0.104939   -0.101767    11.00000    0.02115    0.02607 =
         0.02095    0.00401   -0.00451    0.00252
AFIX  23
H10A  2    0.301237    0.075407   -0.141157    11.00000   -1.20000
H10B  2    0.337105    0.156520   -0.116039    11.00000   -1.20000
AFIX   0
C102  1    0.273802    0.134531   -0.059355    11.00000    0.02592    0.03312 =
         0.03001    0.00578   -0.00144    0.01034
AFIX 137
H10C  2    0.249623    0.174323   -0.084342    11.00000   -1.50000
H10D  2    0.289854    0.164517   -0.020622    11.00000   -1.50000
H10E  2    0.253908    0.083690   -0.045958    11.00000   -1.50000
AFIX   0
C103  1    0.429677    0.348776    0.027125    11.00000    0.02890    0.01530 =
         0.03329    0.00396    0.00016    0.00363
AFIX  23
H10F  2    0.427022    0.339983   -0.020663    11.00000   -1.20000
H10G  2    0.450603    0.402402    0.036752    11.00000   -1.20000
AFIX   0
C104  1    0.373519    0.361399    0.049532    11.00000    0.03509    0.02731 =
         0.05130    0.00171    0.00902    0.01366
AFIX 137
H10H  2    0.375959    0.374189    0.096311    11.00000   -1.50000
H10I  2    0.352773    0.308103    0.041043    11.00000   -1.50000
H10J  2    0.356033    0.409949    0.025524    11.00000   -1.50000
AFIX   0
C105  1    0.523935    0.348983    0.143983    11.00000    0.03412    0.01616 =
         0.02914   -0.00441   -0.00067   -0.00405
AFIX  23
H10K  2    0.518635    0.401724    0.116600    11.00000   -1.20000
H10L  2    0.562649    0.338099    0.150696    11.00000   -1.20000
AFIX   0
C106  1    0.502301    0.366157    0.210053    11.00000    0.05839    0.02976 =
         0.03848   -0.01695    0.00766   -0.00518
AFIX 137
H10M  2    0.521795    0.414661    0.231679    11.00000   -1.50000
H10N  2    0.506767    0.313875    0.237216    11.00000   -1.50000
H10O  2    0.464473    0.380944    0.203620    11.00000   -1.50000
AFIX   0
C107  1    0.628036    0.105043    0.283678    11.00000    0.02321    0.02522 =
         0.02309   -0.00112   -0.00639   -0.00449
AFIX  23
H10P  2    0.642951    0.152753    0.258447    11.00000   -1.20000
H10Q  2    0.658151    0.073062    0.306353    11.00000   -1.20000
AFIX   0
C108  1    0.594087    0.144273    0.334449    11.00000    0.03607    0.03129 =
         0.02067   -0.00498   -0.00198   -0.00653
AFIX 137
H10R  2    0.616363    0.181046    0.364423    11.00000   -1.50000
H10S  2    0.578472    0.097403    0.358965    11.00000   -1.50000
H10T  2    0.565646    0.179536    0.312531    11.00000   -1.50000
AFIX   0
PART   5
C109  1    0.321542    0.500000    0.251644    10.30000    0.02591    0.01450 =
         0.01450    0.00000    0.00007    0.00000
C110  1    0.369370    0.500000    0.289919    10.30000    0.01990    0.02469 =
         0.01456    0.00000    0.00548    0.00000
AFIX  43
H110  2    0.401951    0.500000    0.269793    10.30000   -1.20000
AFIX   0
C111  1    0.369969    0.500000    0.358361    10.30000    0.02073    0.02602 =
         0.02094    0.00000    0.00107    0.00000
AFIX  43
H111  2    0.402867    0.500000    0.384248    10.30000   -1.20000
AFIX   0
C112  1    0.322643    0.500000    0.387887    10.30000    0.02457    0.02246 =
         0.01633    0.00000   -0.00049    0.00000
AFIX  43
H112  2    0.322373    0.500000    0.434003    10.30000   -1.20000
AFIX   0
C113  1    0.275538    0.500000    0.348114    10.30000    0.03059    0.03878 =
         0.02148    0.00000    0.00127    0.00000
AFIX  43
H113  2    0.242877    0.500000    0.368063    10.30000   -1.20000
AFIX   0
C114  1    0.273995    0.500000    0.282776    10.30000    0.02085    0.02484 =
         0.01530    0.00000    0.00286    0.00000
AFIX  43
H114  2    0.240762    0.500000    0.257598    10.30000   -1.20000
AFIX   0
C115  1    0.320873    0.500000    0.179033    10.30000    0.03422    0.03067 =
         0.02008    0.00000    0.00292    0.00000
AFIX 137
H11A  2    0.356103    0.516144    0.166143    10.30000   -1.50000
H11B  2    0.294501    0.542102    0.160936    10.30000   -1.50000
H11C  2    0.311575    0.441753    0.162379    10.30000   -1.50000
AFIX   0
PART   6
C116  1    0.308734    0.500000    0.313608    10.20000    0.04786    0.03352 =
         0.04202    0.00000    0.00273    0.00000
C117  1    0.282812    0.500000    0.253055    10.20000    0.03341    0.03287 =
         0.06221    0.00000   -0.00388    0.00000
AFIX  43
H117  2    0.245069    0.500000    0.247894    10.20000   -1.20000
AFIX   0
C118  1    0.313378    0.500000    0.196840    10.20000    0.04094    0.04050 =
         0.06879    0.00000   -0.00784    0.00000
AFIX  43
H118  2    0.295467    0.500000    0.154457    10.20000   -1.20000
AFIX   0
C119  1    0.366637    0.500000    0.203356    10.20000    0.07083    0.03298 =
         0.04372    0.00000    0.00292    0.00000
AFIX  43
H119  2    0.386663    0.500000    0.166204    10.20000   -1.20000
AFIX   0
C120  1    0.392454    0.500000    0.267608    10.20000    0.07094    0.03350 =
         0.04708    0.00000   -0.03012    0.00000
AFIX  43
H120  2    0.430178    0.500000    0.273381    10.20000   -1.20000
AFIX   0
C121  1    0.365117    0.500000    0.317961    10.20000    0.03481    0.02588 =
         0.04736    0.00000    0.00112    0.00000
AFIX  43
H121  2    0.383650    0.500000    0.359987    10.20000   -1.20000
AFIX   0
C122  1    0.277627    0.500000    0.366865    10.20000    0.04321    0.02054 =
         0.07710    0.00000    0.03582    0.00000
AFIX 137
H12A  2    0.294229    0.537332    0.401334    10.20000   -1.50000
H12B  2    0.274792    0.440497    0.383392    10.20000   -1.50000
H12C  2    0.242065    0.522172    0.353181    10.20000   -1.50000
AFIX   6
PART  -1
C123  1    0.043053   -0.046989    0.422100    10.50000    0.03586    0.05695 =
         0.03914   -0.01262    0.01017   -0.00692
C124  1    0.014962    0.007112    0.377201    10.50000    0.04139    0.10443 =
         0.04324   -0.02827    0.00071   -0.00291
H12G  2   -0.005898   -0.017367    0.341100    10.50000   -1.20000
C125  1    0.017371    0.097032    0.385133    10.50000    0.06754    0.10841 =
         0.03402   -0.00076    0.00446    0.04066
H12H  2   -0.001819    0.134032    0.354454    10.50000   -1.20000
C126  1    0.047890    0.132861    0.437964    10.50000    0.07056    0.04977 =
         0.04070    0.00315    0.01611    0.01311
H12I  2    0.049540    0.194321    0.443395    10.50000   -1.20000
C127  1    0.075981    0.078760    0.482862    10.50000    0.05376    0.04225 =
         0.04567   -0.00433    0.00507   -0.00501
H12J  2    0.096821    0.103259    0.518973    10.50000   -1.20000
C128  1    0.073552   -0.011170    0.474930    10.50000    0.04381    0.04157 =
         0.03208   -0.00731   -0.00054   -0.00512
H12K  2    0.092753   -0.048141    0.505620    10.50000   -1.20000
C129  1    0.039934   -0.145048    0.412707    10.50000    0.06334    0.07568 =
         0.06133   -0.03352    0.02070   -0.02460
AFIX 137
H12D  2    0.068503   -0.173052    0.440222    10.50000   -1.50000
H12E  2    0.043819   -0.159151    0.366909    10.50000   -1.50000
H12F  2    0.005468   -0.166163    0.424935    10.50000   -1.50000
PART   0

AFIX   0
HKLF 4

REM  kbg239 in C2/m
REM R1 =  0.0888 for   15548 Fo > 4sig(Fo)  and  0.1101 for all   19828 data
REM    983 parameters refined using    847 restraints

END

WGHT      0.1356     52.4851

REM Highest difference peak  2.394,  deepest hole -3.061,  1-sigma level  0.168
Q1    1   0.2924  0.1208  0.2561  11.00000  0.05    2.39
Q2    1   0.3313  0.1111  0.2545  11.00000  0.05    1.88
Q3    1   0.2615 -0.2275  0.1931  11.00000  0.05    1.88
Q4    1   0.2476  0.0748  0.4722  11.00000  0.05    1.76
Q5    1   0.3430 -0.0255  0.4065  11.00000  0.05    1.76
Q6    1   0.1430 -0.0483  0.2504  11.00000  0.05    1.71
Q7    1   0.1683 -0.1298  0.2168  11.00000  0.05    1.66
Q8    1   0.2477  0.0000  0.2189  10.50000  0.05    1.62
Q9    1   0.3182 -0.2367  0.2006  11.00000  0.05    1.51
Q10   1   0.4113 -0.1258  0.4812  11.00000  0.05    1.45
Q11   1   0.3882  0.2506  0.4071  11.00000  0.05    1.42
Q12   1   0.2413 -0.2378  0.2165  11.00000  0.05    1.34
Q13   1   0.3057  0.0000  0.2144  10.50000  0.05    1.31
Q14   1   0.2398  0.1571  0.1512  11.00000  0.05    1.30
Q15   1   0.2869 -0.2959  0.3287  11.00000  0.05    1.29
Q16   1   0.3598  0.1241  0.5028  11.00000  0.05    1.26
Q17   1   0.4781  0.0000  0.3767  10.50000  0.05    1.24
Q18   1   0.3338 -0.2544  0.4399  11.00000  0.05    1.18
Q19   1   0.3079  0.0000  0.1020  10.50000  0.05    1.18
Q20   1   0.3745  0.0822  0.3307  11.00000  0.05    1.17
;
_shelx_res_checksum   95574

_shelx_hkl_file
;
   4   0   0    3.53    0.19
  -4   0   0    3.54    0.19
  -4   0   0    3.87    0.19
  -4   0   0    3.47    0.22
   4   0   0    3.29    0.21
  -6   0   0   48.43    2.65
   6   0   0   52.16    2.65
   8   0   0    0.97    0.08
  -8   0   0    1.06    0.06
  -8   0   0    0.86    0.13
   8   0   0    0.78    0.13
  -8   0   0    1.02    0.06
  10   0   0  100.73    5.12
 -10   0   0   94.23    5.12
 -12   0   0   55.88    3.08
  12   0   0   60.17    3.09
 -14   0   0    4.76    0.26
  14   0   0    4.88    0.29
  14   0   0    4.96    0.35
 -14   0   0    5.25    0.27
 -14   0   0    5.19    0.38
 -16   0   0    7.54    0.39
  16   0   0    7.29    0.42
  16   0   0    7.53    0.50
 -16   0   0    7.45    0.49
 -16   0   0    7.38    0.40
 -18   0   0    3.52    0.21
 -18   0   0    3.86    0.34
 -18   0   0    4.03    0.21
  18   0   0    3.84    0.33
  18   0   0    3.87    0.24
 -20   0   0    3.13    0.17
  20   0   0    3.20    0.31
 -20   0   0    2.89    0.32
  20   0   0    3.29    0.22
 -20   0   0    3.10    0.18
 -22   0   0    0.04    0.15
  22   0   0   -0.02    0.06
  22   0   0    0.03    0.14
 -22   0   0   -0.02    0.04
 -24   0   0    3.07    0.18
 -24   0   0    3.05    0.17
 -24   0   0    2.90    0.36
  24   0   0    3.05    0.22
 -26   0   0    1.33    0.10
  26   0   0    1.28    0.16
 -26   0   0    1.30    0.10
  28   0   0    0.07    0.08
 -28   0   0    0.06    0.05
  30   0   0    0.41    0.10
 -30   0   0    0.43    0.06
  32   0   0    5.05    0.33
 -32   0   0    5.21    0.29
 -34   0   0    0.09    0.06
  34   0   0    0.07    0.08
 -36   0   0    0.72    0.10
  36   0   0    0.66    0.12
  38   0   0    0.14    0.09
  40   0   0    0.59    0.11
   3  -1   0   15.44    0.85
  -3  -1   0   15.86    0.85
   3  -1   0   15.90    0.83
   3   1   0   16.04    0.83
  -3   1   0   17.26    0.85
   3   1   0   15.41    0.85
  -5  -1   0   21.21    1.16
   5  -1   0   22.09    1.13
   5  -1   0   22.66    1.16
  -5   1   0   21.26    1.15
   5   1   0   21.99    1.16
   5   1   0   20.39    1.13
  -7  -1   0    3.28    0.25
   7  -1   0    3.72    0.20
  -7  -1   0    3.46    0.18
   7  -1   0    3.42    0.25
  -7  -1   0    3.28    0.18
  -7   1   0    3.30    0.18
  -7   1   0    3.33    0.24
  -7   1   0    3.18    0.18
   7   1   0    3.47    0.20
   7   1   0    3.52    0.25
  -9  -1   0   10.69    0.63
  -9  -1   0   12.24    0.69
   9  -1   0   12.32    0.69
   9  -1   0   11.81    0.64
  -9  -1   0   12.04    0.63
   9   1   0   12.39    0.64
   9   1   0   12.39    0.69
  -9   1   0   12.25    0.69
  -9   1   0   11.94    0.63
 -11  -1   0    2.19    0.12
  11  -1   0    1.80    0.22
  11  -1   0    1.89    0.15
 -11  -1   0    2.10    0.20
 -11  -1   0    2.33    0.12
 -11   1   0    2.30    0.12
  11   1   0    2.00    0.23
 -11   1   0    2.29    0.22
 -11   1   0    2.11    0.12
  11   1   0    1.99    0.14
  13  -1   0    3.69    0.23
 -13  -1   0    3.80    0.20
 -13  -1   0    3.89    0.31
  13  -1   0    3.84    0.30
 -13  -1   0    3.68    0.20
  13   1   0    3.49    0.31
 -13   1   0    3.65    0.20
 -13   1   0    3.42    0.19
 -13   1   0    3.27    0.28
 -15  -1   0   13.71    0.75
 -15  -1   0   14.66    0.75
  15  -1   0   14.06    0.83
  15  -1   0   14.62    0.77
 -15   1   0   14.01    0.84
 -15   1   0   13.77    0.75
 -15   1   0   14.11    0.75
  15   1   0   15.62    0.85
  15   1   0   15.05    0.77
 -17  -1   0   15.15    0.89
 -17  -1   0   13.44    0.77
 -17  -1   0   14.46    0.77
  17  -1   0   15.33    0.80
  17  -1   0   15.87    0.88
 -17   1   0   13.88    0.77
 -17   1   0   14.60    0.77
 -17   1   0   14.28    0.88
  17   1   0   15.23    0.80
  17   1   0   15.90    0.87
 -19  -1   0    0.99    0.20
  19  -1   0    1.06    0.18
 -19  -1   0    1.09    0.07
 -19  -1   0    0.93    0.08
  19  -1   0    1.22    0.13
  19   1   0    1.20    0.13
 -19   1   0    0.99    0.07
 -19   1   0    0.86    0.19
 -19   1   0    0.97    0.07
  19   1   0    1.23    0.19
 -21  -1   0    0.52    0.18
 -21  -1   0    0.52    0.05
  21  -1   0    0.47    0.09
  21  -1   0    0.51    0.17
 -21  -1   0    0.41    0.06
 -21   1   0    0.44    0.06
  21   1   0    0.76    0.17
  21   1   0    0.48    0.09
 -21   1   0    0.47    0.05
 -21   1   0    0.48    0.17
  23  -1   0    0.35    0.08
  23  -1   0    0.31    0.17
 -23  -1   0    0.60    0.19
 -23  -1   0    0.33    0.05
 -23  -1   0    0.42    0.05
  23   1   0    0.33    0.08
 -23   1   0    0.56    0.19
  23   1   0    0.56    0.18
 -23   1   0    0.41    0.05
 -23   1   0    0.38    0.05
  25  -1   0    8.49    0.49
 -25  -1   0    8.70    0.46
 -25  -1   0    8.19    0.46
  25   1   0    8.52    0.50
 -25   1   0    8.93    0.46
 -25   1   0    8.93    0.46
  27  -1   0    0.38    0.09
 -27  -1   0    0.45    0.07
  27   1   0    0.40    0.09
 -27   1   0    0.45    0.07
 -29  -1   0    1.75    0.12
  29  -1   0    1.80    0.18
  29   1   0    1.55    0.18
 -29   1   0    1.98    0.13
 -31  -1   0   -0.02    0.05
  31  -1   0    0.02    0.08
  31   1   0    0.01    0.08
 -31   1   0   -0.06    0.05
 -33  -1   0    2.57    0.17
  33  -1   0    2.66    0.22
 -33   1   0    2.74    0.17
  33   1   0    2.73    0.21
 -35  -1   0    0.54    0.08
  35  -1   0    0.40    0.10
  35   1   0    0.41    0.10
 -35   1   0    0.40    0.07
 -37  -1   0    0.11    0.06
  37  -1   0    0.02    0.09
  37   1   0    0.10    0.09
 -37   1   0    0.04    0.06
  39  -1   0    0.19    0.10
  39   1   0    0.06    0.09
  41  -1   0    0.15    0.10
  41   1   0    0.19    0.10
   0  -2   0  143.36    6.84
   0  -2   0  114.43    6.92
   0   2   0  114.22    6.92
  -2  -2   0    0.57    0.04
   2  -2   0    0.66    0.06
   2  -2   0    0.64    0.04
  -2  -2   0    0.50    0.08
   2   2   0    0.43    0.07
   2   2   0    0.47    0.04
  -2   2   0    0.53    0.06
   2   2   0    0.53    0.03
  -2   2   0    0.52    0.03
   4  -2   0    1.37    0.09
   4  -2   0    1.62    0.13
  -4  -2   0    1.56    0.15
  -4  -2   0    1.61    0.09
  -4   2   0    1.59    0.08
   4   2   0    1.46    0.10
   4   2   0    1.55    0.08
  -4   2   0    1.72    0.09
   4   2   0    1.56    0.14
  -4   2   0    1.67    0.13
   6  -2   0    1.14    0.08
   6  -2   0    1.05    0.13
  -6  -2   0    1.10    0.06
  -6  -2   0    0.78    0.12
  -6   2   0    0.95    0.13
  -6   2   0    1.08    0.06
  -6   2   0    1.04    0.06
   6   2   0    0.82    0.12
   6   2   0    1.14    0.06
   6   2   0    1.02    0.09
  -8  -2   0   21.24    1.15
   8  -2   0   20.85    1.10
   8  -2   0   20.28    1.14
   8   2   0   20.36    1.10
  -8   2   0   22.21    1.14
   8   2   0   20.91    1.15
 -10  -2   0   33.10    1.69
  10  -2   0   32.40    1.68
  10  -2   0   27.21    1.63
 -10   2   0   30.91    1.68
  10   2   0   30.62    1.64
  10   2   0   32.97    1.69
  12  -2   0    0.35    0.12
 -12  -2   0    0.36    0.04
 -12  -2   0    0.36    0.12
  12  -2   0    0.40    0.06
 -12   2   0    0.42    0.03
 -12   2   0    0.26    0.12
 -12   2   0    0.34    0.03
  12   2   0    0.30    0.06
  12   2   0    0.41    0.13
  14  -2   0    0.63    0.08
 -14  -2   0    0.88    0.06
 -14  -2   0    0.86    0.06
  14  -2   0    0.80    0.16
 -14  -2   0    0.46    0.15
 -14   2   0    0.80    0.15
 -14   2   0    0.90    0.06
 -14   2   0    0.93    0.05
  14   2   0    0.66    0.09
 -16  -2   0    4.16    0.24
  16  -2   0    4.13    0.35
 -16  -2   0    4.97    0.24
 -16  -2   0    3.62    0.35
  16  -2   0    4.52    0.26
 -16   2   0    4.19    0.23
  16   2   0    4.34    0.27
 -16   2   0    3.98    0.35
 -16   2   0    4.34    0.24
  16   2   0    4.94    0.36
 -18  -2   0   13.17    0.85
 -18  -2   0   14.95    0.74
  18  -2   0   14.52    0.76
  18  -2   0   14.56    0.84
 -18  -2   0   13.58    0.74
 -18   2   0   13.96    0.74
  18   2   0   14.53    0.77
  18   2   0   14.56    0.85
 -18   2   0   13.56    0.85
 -18   2   0   13.73    0.74
 -20  -2   0    8.60    0.41
  20  -2   0    7.73    0.44
 -20  -2   0    6.81    0.54
 -20  -2   0    7.61    0.41
  20  -2   0    7.26    0.52
  20   2   0    7.03    0.51
  20   2   0    7.79    0.44
 -20   2   0    7.33    0.54
 -20   2   0    8.30    0.41
 -20   2   0    7.87    0.41
  22  -2   0    0.16    0.08
  22  -2   0    0.19    0.12
 -22  -2   0    0.22    0.16
 -22  -2   0    0.20    0.04
 -22   2   0    0.16    0.04
 -22   2   0    0.19    0.03
 -22   2   0    0.03    0.12
  22   2   0    0.13    0.08
  22   2   0    0.10    0.12
  24  -2   0   12.59    0.67
 -24  -2   0   11.94    0.64
  24  -2   0   11.28    0.76
 -24  -2   0   12.69    0.63
 -24   2   0   12.15    0.64
 -24   2   0   10.15    0.76
 -24   2   0   12.33    0.63
  26  -2   0    0.78    0.11
 -26  -2   0    1.09    0.09
 -26   2   0    1.20    0.09
 -26   2   0    0.95    0.08
  26   2   0    0.78    0.11
 -28  -2   0    0.70    0.08
  28  -2   0    0.57    0.11
 -28   2   0    0.75    0.08
  28   2   0    0.57    0.10
  30  -2   0    0.09    0.08
 -30  -2   0   -0.01    0.05
 -30   2   0    0.03    0.05
  30   2   0    0.05    0.08
  32  -2   0    0.30    0.09
 -32  -2   0    0.30    0.06
  32   2   0    0.22    0.09
 -32   2   0    0.37    0.06
  34  -2   0    0.02    0.09
 -34  -2   0    0.05    0.06
  34   2   0    0.04    0.08
 -34   2   0    0.02    0.05
 -36  -2   0    0.52    0.08
  36  -2   0    0.34    0.10
 -36   2   0    0.48    0.08
  36   2   0    0.45    0.10
  38  -2   0   -0.01    0.09
  38   2   0   -0.03    0.09
 -38   2   0   -0.05    0.07
  40  -2   0    0.01    0.10
  40   2   0   -0.03    0.09
  -1  -3   0    9.86    0.53
  -1  -3   0   10.63    0.53
   1   3   0    9.75    0.52
   1   3   0    9.56    0.53
  -3  -3   0  157.21    9.11
  -3  -3   0  164.49    9.08
   3  -3   0  161.12    8.89
   3  -3   0  159.11    9.18
   3   3   0  162.54    9.21
  -3   3   0  148.45    9.16
  -5  -3   0   19.30    1.05
   5  -3   0   21.76    1.07
   5  -3   0   20.05    1.05
  -5  -3   0   18.60    1.08
   5   3   0   20.50    1.05
  -5   3   0   20.77    1.07
   5   3   0   19.64    1.08
   7  -3   0   -0.01    0.07
   7  -3   0    0.02    0.04
  -7  -3   0   -0.01    0.08
  -7  -3   0    0.05    0.02
   7   3   0    0.10    0.01
   7   3   0    0.01    0.04
   7   3   0    0.00    0.08
  -7   3   0    0.08    0.02
  -7   3   0    0.09    0.07
  -7   3   0    0.09    0.02
   9  -3   0   17.57    0.88
  -9  -3   0   15.56    0.82
   9  -3   0   15.85    0.83
  -9  -3   0   15.55    0.88
  -9   3   0   13.74    0.87
   9   3   0   15.00    0.83
   9   3   0   15.57    0.82
   9   3   0   17.05    0.89
  11  -3   0    1.11    0.10
 -11  -3   0    1.15    0.08
  11  -3   0    1.40    0.18
 -11  -3   0    1.18    0.17
 -11   3   0    1.32    0.08
 -11   3   0    1.01    0.15
  11   3   0    1.22    0.11
  11   3   0    1.29    0.07
 -11   3   0    1.26    0.07
  11   3   0    1.25    0.17
  13  -3   0   11.77    0.62
 -13  -3   0   11.19    0.69
 -13  -3   0   11.38    0.61
  13  -3   0   11.03    0.68
 -13   3   0   10.91    0.60
  13   3   0   11.54    0.62
  13   3   0   12.56    0.69
 -13   3   0   11.67    0.73
 -13   3   0   11.68    0.61
 -15  -3   0    7.71    0.51
  15  -3   0    8.20    0.56
 -15  -3   0    7.05    0.42
  15  -3   0    8.72    0.44
 -15   3   0    8.02    0.42
 -15   3   0    8.35    0.42
 -15   3   0    7.41    0.52
  15   3   0    8.15    0.45
  15   3   0    8.19    0.53
  17  -3   0    7.36    0.39
 -17  -3   0    6.89    0.37
 -17  -3   0    6.13    0.48
  17  -3   0    7.00    0.46
 -17  -3   0    6.65    0.37
 -17   3   0    6.91    0.36
 -17   3   0    7.22    0.37
  17   3   0    7.19    0.39
  17   3   0    7.50    0.48
 -17   3   0    5.59    0.46
 -19  -3   0    4.44    0.24
 -19  -3   0    4.10    0.38
  19  -3   0    4.96    0.36
 -19  -3   0    4.23    0.24
  19  -3   0    4.43    0.27
  19   3   0    4.20    0.27
 -19   3   0    4.31    0.24
  19   3   0    4.28    0.36
 -19   3   0    3.52    0.36
 -21  -3   0   10.15    0.48
  21  -3   0    9.52    0.61
 -21  -3   0    8.80    0.48
  21  -3   0    8.55    0.51
 -21  -3   0    8.32    0.61
  21   3   0    8.64    0.51
 -21   3   0    9.07    0.61
 -21   3   0    9.07    0.48
 -21   3   0    8.79    0.47
  21   3   0    8.62    0.61
 -23  -3   0    2.67    0.15
  23  -3   0    2.63    0.20
 -23  -3   0    2.37    0.33
 -23  -3   0    2.59    0.15
  23  -3   0    2.64    0.31
 -23   3   0    2.23    0.30
 -23   3   0    2.59    0.15
 -23   3   0    2.53    0.15
  23   3   0    2.30    0.32
  23   3   0    2.45    0.20
 -25  -3   0    0.32    0.05
  25  -3   0    0.39    0.09
 -25  -3   0    0.51    0.07
 -25   3   0    0.46    0.06
  25   3   0    0.30    0.09
 -25   3   0    0.47    0.06
  27  -3   0   -0.12    0.07
 -27  -3   0    0.00    0.04
 -27   3   0   -0.02    0.04
  27   3   0   -0.10    0.08
 -27   3   0    0.03    0.03
 -29  -3   0    0.14    0.05
  29  -3   0    0.16    0.08
 -29   3   0    0.11    0.05
  29   3   0    0.09    0.08
  31  -3   0    2.10    0.19
 -31  -3   0    2.06    0.14
  31   3   0    2.00    0.19
 -31   3   0    2.07    0.14
  33  -3   0    0.01    0.09
 -33  -3   0    0.04    0.05
 -33   3   0    0.05    0.05
  33   3   0    0.01    0.08
  35  -3   0    0.19    0.10
 -35  -3   0    0.24    0.06
  35   3   0    0.05    0.09
 -35   3   0    0.27    0.06
  37  -3   0   -0.04    0.09
 -37   3   0   -0.03    0.06
  37   3   0    0.01    0.15
  39  -3   0    0.02    0.10
  39   3   0    0.04    0.09
  41  -3   0    0.00    0.10
  41   3   0    0.08    0.09
   0  -4   0    5.95    0.32
   0  -4   0    5.23    0.31
   0   4   0    6.42    0.31
  -2  -4   0   25.57    1.50
   2   4   0   31.53    1.50
  -4  -4   0  140.74    8.58
   4  -4   0  155.34    8.87
   4  -4   0  145.41    8.49
  -4  -4   0  146.63    8.79
   4   4   0  148.18    8.68
  -4   4   0  137.82    8.88
   4   4   0  148.11    8.77
  -6  -4   0   91.91    4.86
   6   4   0   90.11    4.86
  -6   4   0   96.29    4.85
   8  -4   0   39.79    2.26
  -8  -4   0   44.83    2.31
   8  -4   0   44.63    2.29
   8   4   0   41.71    2.26
   8   4   0   45.38    2.30
  -8   4   0   43.53    2.29
 -10  -4   0   23.48    1.29
  10  -4   0   25.32    1.23
  10  -4   0   22.51    1.27
  10   4   0   23.03    1.28
 -10   4   0   21.29    1.27
  10   4   0   24.72    1.24
 -12  -4   0    0.75    0.14
  12  -4   0    0.88    0.15
  12  -4   0    0.73    0.10
 -12  -4   0    0.88    0.07
 -12   4   0    1.04    0.06
  12   4   0    1.03    0.06
  12   4   0    0.99    0.16
  12   4   0    0.80    0.10
 -12   4   0    0.80    0.06
 -12   4   0    0.63    0.14
 -14  -4   0    5.40    0.29
  14  -4   0    5.63    0.38
 -14  -4   0    5.53    0.40
  14  -4   0    4.64    0.31
 -14   4   0    5.15    0.28
 -14   4   0    5.04    0.37
 -14   4   0    5.35    0.28
  14   4   0    5.50    0.31
  14   4   0    5.32    0.37
 -16  -4   0    4.27    0.36
  16  -4   0    4.68    0.26
  16  -4   0    4.67    0.34
 -16  -4   0    4.22    0.24
 -16   4   0    3.54    0.37
 -16   4   0    4.45    0.24
  16   4   0    4.68    0.26
  16   4   0    4.31    0.35
 -16   4   0    4.26    0.24
 -18  -4   0    9.39    0.62
 -18  -4   0    9.59    0.52
 -18  -4   0    9.37    0.52
  18  -4   0   10.40    0.54
  18  -4   0    9.81    0.61
 -18   4   0    9.22    0.51
  18   4   0   10.27    0.54
 -18   4   0    9.76    0.52
  18   4   0    9.86    0.61
  20  -4   0    0.44    0.16
  20  -4   0    0.45    0.08
 -20  -4   0    0.45    0.18
 -20  -4   0    0.38    0.06
 -20   4   0    0.30    0.16
  20   4   0    0.29    0.08
 -20   4   0    0.48    0.05
 -20   4   0    0.45    0.05
  20   4   0    0.39    0.16
  22  -4   0    2.05    0.27
 -22  -4   0    1.87    0.11
 -22  -4   0    1.69    0.11
  22  -4   0    1.63    0.17
 -22  -4   0    1.48    0.25
  22   4   0    1.71    0.17
 -22   4   0    1.51    0.24
 -22   4   0    1.82    0.11
  22   4   0    1.93    0.28
 -22   4   0    1.67    0.11
 -24  -4   0    2.08    0.13
  24  -4   0    2.04    0.18
 -24  -4   0    2.19    0.13
  24  -4   0    2.22    0.31
  24   4   0    2.00    0.19
 -24   4   0    2.10    0.13
 -24   4   0    1.75    0.26
 -24   4   0    2.21    0.13
  26  -4   0    0.77    0.11
 -26  -4   0    0.85    0.08
 -26   4   0    1.00    0.08
  26   4   0    0.63    0.11
 -26   4   0    1.08    0.08
 -28  -4   0    1.09    0.09
  28  -4   0    0.92    0.12
  28   4   0    1.00    0.12
 -28   4   0    1.15    0.09
  30  -4   0    0.19    0.09
 -30  -4   0    0.03    0.05
 -30   4   0    0.04    0.05
  30   4   0    0.13    0.08
 -32  -4   0   -0.03    0.05
  32  -4   0   -0.01    0.08
 -32   4   0   -0.03    0.05
  32   4   0    0.05    0.08
 -34  -4   0    0.23    0.06
  34  -4   0    0.23    0.10
  34   4   0    0.24    0.09
 -34   4   0    0.29    0.06
 -36  -4   0    0.12    0.06
  36  -4   0    0.21    0.10
 -36   4   0    0.21    0.07
  36   4   0    0.19    0.09
  38  -4   0    0.92    0.13
  38   4   0    0.81    0.12
 -38   4   0    0.93    0.11
  40  -4   0    0.13    0.10
  40   4   0    0.15    0.10
   1  -5   0    7.79    0.45
  -1  -5   0    9.06    0.45
  -1  -5   0    8.38    0.44
  -1   5   0    7.64    0.43
   1   5   0    7.76    0.43
   1   5   0    8.32    0.43
   1   5   0    8.77    0.44
   3  -5   0  306.09   15.95
  -3  -5   0  266.65   15.52
   3  -5   0  275.49   15.44
  -3  -5   0  273.69   15.79
   3   5   0  272.57   15.80
  -3   5   0  283.91   15.88
  -5  -5   0   20.82    1.05
   5  -5   0   19.01    1.06
  -5  -5   0   21.18    1.09
   5  -5   0   21.90    1.05
   5   5   0   20.16    1.05
  -5   5   0   17.89    1.06
   5   5   0   19.50    1.08
   7  -5   0    5.51    0.28
  -7  -5   0    5.01    0.34
  -7  -5   0    5.10    0.29
   7   5   0    5.42    0.28
  -7   5   0    5.11    0.28
  -7   5   0    5.32    0.32
   7   5   0    5.01    0.34
  -7   5   0    5.11    0.28
   7   5   0    5.49    0.29
  -9  -5   0   25.18    1.33
   9  -5   0   24.30    1.36
   9  -5   0   24.71    1.33
  -9  -5   0   27.70    1.39
  -9   5   0   25.28    1.37
   9   5   0   25.16    1.38
 -11  -5   0   11.13    0.68
  11  -5   0   11.48    0.66
  11  -5   0   10.61    0.61
 -11  -5   0   11.94    0.60
 -11   5   0   11.46    0.66
 -11   5   0   11.44    0.60
  11   5   0   11.41    0.67
  11   5   0   11.52    0.61
 -11   5   0   10.98    0.59
 -13  -5   0   12.34    0.72
  13  -5   0   11.40    0.65
  13  -5   0   10.48    0.69
  13   5   0   12.41    0.63
  13   5   0   12.52    0.65
 -13   5   0   14.10    0.72
  13   5   0   11.54    0.72
 -13   5   0   12.64    0.63
 -13   5   0   10.94    0.63
  15  -5   0    0.71    0.15
  15  -5   0    0.80    0.10
 -15  -5   0    0.69    0.07
 -15  -5   0    0.92    0.17
  15   5   0    0.76    0.15
  15   5   0    0.83    0.11
 -15   5   0    0.63    0.15
  15   5   0    0.77    0.05
  17  -5   0    0.83    0.16
 -17  -5   0    0.78    0.07
 -17  -5   0    0.94    0.18
  17  -5   0    0.94    0.12
  17   5   0    0.91    0.06
 -17   5   0    0.72    0.17
 -17   5   0    0.90    0.07
  17   5   0    0.91    0.10
 -17   5   0    0.93    0.07
  17   5   0    1.00    0.17
 -19  -5   0    2.17    0.30
 -19  -5   0    2.35    0.15
  19  -5   0    2.46    0.18
 -19  -5   0    2.44    0.15
  19  -5   0    2.75    0.28
 -19   5   0    1.85    0.29
  19   5   0    2.38    0.19
 -19   5   0    2.74    0.14
 -19   5   0    2.57    0.15
  19   5   0    2.21    0.28
 -21  -5   0    2.30    0.14
 -21  -5   0    2.46    0.15
  21  -5   0    2.17    0.18
  21  -5   0    2.05    0.28
 -21  -5   0    2.36    0.31
  21   5   0    2.69    0.31
 -21   5   0    2.57    0.30
 -21   5   0    2.36    0.14
  21   5   0    2.37    0.19
 -21   5   0    2.47    0.14
 -23  -5   0    1.42    0.11
  23  -5   0    1.34    0.16
 -23  -5   0    1.03    0.20
  23  -5   0    1.38    0.23
 -23  -5   0    1.61    0.11
 -23   5   0    1.57    0.11
 -23   5   0    1.59    0.10
  23   5   0    1.59    0.16
 -23   5   0    1.30    0.23
 -25  -5   0    0.76    0.08
 -25  -5   0    0.74    0.08
  25   5   0    0.64    0.10
 -25   5   0    0.81    0.07
 -25   5   0    0.80    0.08
  27  -5   0    0.39    0.09
 -27  -5   0    0.53    0.08
  27   5   0    0.37    0.10
 -27   5   0    0.76    0.07
 -27   5   0    0.58    0.08
  29  -5   0    3.16    0.23
 -29  -5   0    3.08    0.19
 -29   5   0    3.08    0.19
  29   5   0    2.97    0.23
  31  -5   0    0.27    0.09
 -31  -5   0    0.21    0.06
  31   5   0    0.36    0.09
 -31   5   0    0.31    0.06
 -33  -5   0    0.19    0.06
  33  -5   0    0.20    0.09
  33   5   0    0.17    0.09
 -33   5   0    0.25    0.06
 -35  -5   0   -0.01    0.06
  35  -5   0    0.03    0.09
 -35   5   0    0.05    0.06
  35   5   0    0.06    0.09
  37  -5   0    0.02    0.10
 -37   5   0   -0.03    0.06
  37   5   0    0.03    0.09
  39  -5   0   -0.04    0.10
  39   5   0   -0.09    0.09
  41  -5   0   -0.08    0.09
  41   5   0    0.00    0.09
   0  -6   0   49.66    4.02
   0  -6   0   51.52    3.73
   0   6   0   52.93    4.18
  -2  -6   0   15.65    0.77
  -2  -6   0   15.11    0.76
   2  -6   0   11.87    0.78
   2   6   0   14.04    0.75
   2   6   0   14.94    0.76
   2   6   0   14.54    0.75
  -4  -6   0   67.28    3.78
   4   6   0   77.26    3.78
   6  -6   0    5.57    0.28
  -6  -6   0    5.51    0.29
   6  -6   0    5.48    0.31
  -6  -6   0    5.46    0.34
   6   6   0    4.47    0.32
  -6   6   0    5.11    0.31
   6   6   0    5.63    0.29
  -6   6   0    4.86    0.28
  -6   6   0    5.29    0.28
   8  -6   0    0.10    0.07
   8  -6   0    0.08    0.03
  -8  -6   0    0.14    0.09
  -8  -6   0    0.06    0.04
   8   6   0    0.05    0.08
   8   6   0    0.09    0.04
  -8   6   0    0.12    0.02
  -8   6   0    0.11    0.07
  -8   6   0    0.09    0.02
 -10  -6   0    4.64    0.35
 -10  -6   0    5.30    0.28
  10  -6   0    4.98    0.28
  10  -6   0    4.72    0.33
  10   6   0    5.10    0.27
  10   6   0    4.78    0.29
  10   6   0    5.39    0.35
 -10   6   0    5.17    0.27
 -10   6   0    5.24    0.27
 -10   6   0    4.87    0.33
  12  -6   0    0.15    0.05
 -12  -6   0    0.06    0.11
  12  -6   0    0.13    0.09
 -12  -6   0    0.14    0.03
  12   6   0    0.14    0.05
  12   6   0    0.11    0.10
 -12   6   0    0.21    0.10
 -12   6   0    0.17    0.04
  12   6   0    0.19    0.02
 -12   6   0    0.23    0.03
  14  -6   0    5.39    0.30
 -14  -6   0    5.20    0.39
  14  -6   0    5.35    0.36
 -14  -6   0    5.03    0.28
  14   6   0    4.44    0.37
  14   6   0    5.03    0.27
 -14   6   0    4.97    0.27
  14   6   0    5.03    0.30
 -14   6   0    5.54    0.28
 -14   6   0    4.78    0.37
  16  -6   0    1.52    0.13
 -16  -6   0    1.15    0.20
 -16  -6   0    1.65    0.10
  16  -6   0    1.48    0.21
 -16   6   0    1.31    0.09
  16   6   0    1.51    0.09
 -16   6   0    1.39    0.09
  16   6   0    1.54    0.13
 -16   6   0    1.01    0.18
  16   6   0    1.06    0.19
 -18  -6   0    1.72    0.25
 -18  -6   0    2.26    0.13
  18  -6   0    2.18    0.16
  18  -6   0    2.41    0.28
  18   6   0    2.22    0.28
 -18   6   0    2.15    0.13
  18   6   0    1.99    0.17
 -18   6   0    2.04    0.26
  18   6   0    2.03    0.13
 -18   6   0    2.13    0.13
  20  -6   0   11.64    0.64
  20  -6   0   12.69    0.73
 -20  -6   0   10.95    0.74
 -20  -6   0   10.55    0.62
 -20  -6   0   11.79    0.62
 -20   6   0   11.57    0.62
  20   6   0   11.96    0.74
  20   6   0   11.52    0.64
 -20   6   0   12.14    0.61
 -20   6   0   11.29    0.74
  22  -6   0    0.20    0.15
  22  -6   0    0.07    0.07
 -22  -6   0    0.20    0.16
 -22  -6   0    0.02    0.04
 -22  -6   0    0.07    0.05
 -22   6   0   -0.01    0.13
  22   6   0    0.07    0.07
 -22   6   0    0.06    0.03
 -22   6   0    0.07    0.04
  22   6   0    0.08    0.15
 -24  -6   0    1.69    0.11
  24  -6   0    1.19    0.23
  24  -6   0    1.12    0.15
 -24  -6   0    1.41    0.11
 -24   6   0    1.43    0.10
 -24   6   0    1.58    0.10
  24   6   0    1.04    0.16
 -24   6   0    1.17    0.23
 -26  -6   0    2.92    0.17
  26  -6   0    2.69    0.22
  26   6   0    2.77    0.23
 -26   6   0    2.91    0.17
 -26   6   0    2.98    0.18
 -28  -6   0    4.05    0.24
  28  -6   0    4.59    0.29
 -28   6   0    4.31    0.24
 -28   6   0    4.17    0.24
  28   6   0    4.41    0.28
  30  -6   0    0.58    0.10
 -30  -6   0    0.61    0.08
  30   6   0    0.48    0.10
 -30   6   0    0.65    0.08
  32  -6   0    1.05    0.13
 -32  -6   0    1.18    0.10
  32   6   0    1.12    0.15
 -32   6   0    1.17    0.10
 -34  -6   0    0.06    0.05
  34  -6   0    0.02    0.10
 -34   6   0    0.09    0.06
  34   6   0    0.18    0.09
  36  -6   0    0.41    0.11
 -36   6   0    0.32    0.07
  36   6   0    0.37    0.11
  38  -6   0   -0.07    0.10
  38   6   0    0.19    0.10
 -38   6   0    0.04    0.06
  40  -6   0   -0.19    0.09
  40   6   0   -0.05    0.09
  -1  -7   0   18.17    0.95
  -1  -7   0   17.90    0.94
   1  -7   0   19.23    0.95
  -1   7   0   16.71    0.93
   1   7   0   17.94    0.93
   1   7   0   17.23    0.93
  -3  -7   0    0.92    0.12
   3  -7   0    0.99    0.11
  -3  -7   0    0.98    0.10
  -3   7   0    1.12    0.07
   3   7   0    1.01    0.07
   3   7   0    1.17    0.10
   3   7   0    1.24    0.07
  -5  -7   0   55.65    3.12
   5   7   0   62.94    3.12
   7  -7   0    9.11    0.49
  -7  -7   0    7.73    0.52
  -7  -7   0    9.47    0.48
   7  -7   0    9.37    0.47
  -7   7   0    8.29    0.47
  -7   7   0    8.71    0.46
  -7   7   0    7.42    0.49
   7   7   0    9.39    0.52
   7   7   0    8.92    0.46
   7   7   0    9.48    0.47
   9  -7   0   10.87    0.66
  -9  -7   0   13.30    0.69
   9  -7   0   11.85    0.62
  -9  -7   0   10.69    0.63
  -9   7   0   11.56    0.61
   9   7   0   12.21    0.68
   9   7   0   11.54    0.63
  -9   7   0   12.07    0.62
   9   7   0   11.59    0.61
  11  -7   0    2.99    0.16
  11  -7   0    2.25    0.22
 -11  -7   0    2.54    0.26
 -11  -7   0    2.67    0.17
 -11   7   0    2.77    0.15
  11   7   0    2.53    0.24
 -11   7   0    2.71    0.15
 -11   7   0    2.51    0.23
  11   7   0    2.90    0.15
  11   7   0    2.51    0.17
 -13  -7   0    0.27    0.13
 -13  -7   0    0.25    0.05
  13  -7   0    0.28    0.05
  13  -7   0    0.25    0.11
 -13   7   0    0.26    0.04
  13   7   0    0.24    0.12
  13   7   0    0.21    0.06
 -13   7   0    0.29    0.03
  13   7   0    0.28    0.04
 -13   7   0    0.31    0.12
 -15  -7   0    9.72    0.66
  15  -7   0   10.63    0.56
 -15  -7   0   10.76    0.55
  15  -7   0    9.31    0.62
 -15   7   0   10.05    0.63
  15   7   0   10.08    0.57
  15   7   0   10.41    0.55
 -15   7   0   11.05    0.55
  15   7   0   10.25    0.65
 -15   7   0   10.69    0.55
 -17  -7   0    3.35    0.19
  17  -7   0    2.89    0.21
 -17  -7   0    2.40    0.31
  17  -7   0    3.31    0.30
 -17   7   0    3.28    0.18
  17   7   0    3.21    0.31
  17   7   0    3.35    0.18
 -17   7   0    3.22    0.18
  17   7   0    3.25    0.22
 -17   7   0    3.28    0.31
  19  -7   0    0.08    0.14
  19  -7   0    0.09    0.06
 -19  -7   0    0.11    0.15
 -19  -7   0    0.13    0.04
  19   7   0    0.09    0.03
  19   7   0    0.09    0.13
  19   7   0    0.09    0.07
 -19   7   0    0.09    0.03
 -19   7   0    0.08    0.03
 -19   7   0   -0.04    0.13
  21  -7   0    0.19    0.07
  21  -7   0    0.16    0.14
 -21  -7   0    0.16    0.05
 -21  -7   0    0.14    0.16
 -21   7   0    0.12    0.15
 -21   7   0    0.18    0.05
  21   7   0    0.14    0.08
 -21   7   0    0.28    0.04
  21   7   0    0.23    0.12
  23  -7   0    0.00    0.07
 -23  -7   0    0.09    0.05
  23  -7   0    0.02    0.15
 -23  -7   0    0.15    0.05
 -23   7   0    0.10    0.04
 -23   7   0    0.06    0.04
 -23   7   0    0.04    0.15
  23   7   0   -0.07    0.07
 -25  -7   0    1.25    0.11
 -25  -7   0    0.92    0.09
  25   7   0    0.56    0.10
 -25   7   0    0.92    0.08
 -25   7   0    0.88    0.07
 -27  -7   0    0.16    0.05
  27  -7   0    0.17    0.08
 -27   7   0    0.22    0.05
 -27   7   0    0.10    0.05
  27   7   0    0.19    0.08
  29  -7   0    2.14    0.19
 -29  -7   0    2.07    0.14
  29   7   0    2.32    0.19
 -29   7   0    2.03    0.14
 -31  -7   0    1.20    0.11
  31  -7   0    1.31    0.18
  31   7   0    1.16    0.16
 -31   7   0    1.30    0.11
 -33  -7   0    0.24    0.06
  33  -7   0    0.24    0.10
 -33   7   0    0.30    0.07
  33   7   0    0.22    0.09
 -35  -7   0    0.54    0.08
  35  -7   0    0.55    0.11
 -35   7   0    0.63    0.09
  35   7   0    0.50    0.11
 -37   7   0    0.98    0.11
  37   7   0    0.88    0.13
  39  -7   0   -0.07    0.10
  39   7   0   -0.13    0.10
   0  -8   0  316.18   16.89
   0  -8   0  261.97   16.88
   0   8   0  302.70   17.20
  -2  -8   0   14.75    0.81
   2  -8   0   14.82    0.82
  -2   8   0   15.05    0.80
   2   8   0   16.14    0.81
   2   8   0   15.65    0.80
   4  -8   0   10.71    0.57
  -4  -8   0    8.86    0.57
  -4  -8   0   10.00    0.56
   4   8   0   10.68    0.54
   4   8   0   10.24    0.56
  -4   8   0   10.27    0.53
   6  -8   0   33.75    1.72
  -6  -8   0   32.61    1.72
  -6  -8   0   35.13    1.76
   6   8   0   34.19    1.71
  -6   8   0   29.74    1.72
   6   8   0   31.50    1.75
  -8  -8   0    9.84    0.63
   8  -8   0   10.71    0.59
  -8  -8   0   12.12    0.57
   8  -8   0   10.14    0.56
  -8   8   0   10.58    0.59
   8   8   0   11.41    0.57
  -8   8   0   10.28    0.56
   8   8   0   10.11    0.62
   8   8   0   10.58    0.56
  -8   8   0   10.06    0.56
 -10  -8   0    7.95    0.42
  10  -8   0    7.83    0.42
 -10  -8   0    8.24    0.51
  10  -8   0    8.71    0.46
 -10   8   0    7.75    0.41
 -10   8   0    7.99    0.41
  10   8   0    7.27    0.41
 -10   8   0    8.08    0.46
  10   8   0    6.87    0.48
  10   8   0    7.17    0.43
 -12  -8   0    7.61    0.40
  12  -8   0    6.77    0.45
 -12  -8   0    7.10    0.49
  12   8   0    7.32    0.41
  12   8   0    7.25    0.39
 -12   8   0    6.87    0.45
 -12   8   0    8.12    0.39
 -12   8   0    7.44    0.39
  12   8   0    7.12    0.48
  14  -8   0    2.12    0.22
 -14  -8   0    1.82    0.27
  14  -8   0    2.09    0.14
 -14  -8   0    1.98    0.14
  14   8   0    1.79    0.15
  14   8   0    2.20    0.12
 -14   8   0    2.03    0.12
 -14   8   0    2.05    0.13
  14   8   0    2.16    0.24
 -16  -8   0    3.68    0.34
 -16  -8   0    3.36    0.20
  16  -8   0    3.96    0.31
  16  -8   0    3.39    0.22
 -16   8   0    3.45    0.19
  16   8   0    3.20    0.31
  16   8   0    3.52    0.23
 -16   8   0    3.38    0.20
 -16   8   0    2.95    0.30
  16   8   0    3.68    0.19
 -18  -8   0    0.73    0.19
  18  -8   0    0.86    0.17
  18  -8   0    0.76    0.09
 -18  -8   0    0.83    0.08
 -18   8   0    0.72    0.07
  18   8   0    0.67    0.09
 -18   8   0    0.68    0.08
  18   8   0    0.75    0.06
 -18   8   0    0.57    0.17
  18   8   0    0.62    0.16
 -20  -8   0    8.73    0.48
  20  -8   0    9.55    0.50
 -20  -8   0    8.71    0.63
  20  -8   0    9.30    0.60
 -20   8   0    9.25    0.48
  20   8   0    8.07    0.59
  20   8   0    9.26    0.48
 -20   8   0    8.95    0.48
  20   8   0    8.90    0.51
 -20   8   0    8.57    0.60
 -22  -8   0    0.61    0.08
  22  -8   0    0.68    0.09
  22  -8   0    1.02    0.20
 -22  -8   0    0.50    0.20
  22   8   0    0.68    0.10
 -22   8   0    0.90    0.20
 -22   8   0    0.65    0.07
 -22   8   0    0.64    0.08
  24  -8   0    0.77    0.19
  24  -8   0    0.78    0.11
 -24  -8   0    0.76    0.08
 -24  -8   0    0.87    0.10
  24   8   0    0.63    0.10
 -24   8   0    0.59    0.19
 -24   8   0    0.92    0.07
 -24   8   0    0.72    0.08
 -26  -8   0    0.52    0.08
  26  -8   0    0.37    0.08
 -26   8   0    0.52    0.08
 -26   8   0    0.60    0.07
  26   8   0    0.36    0.09
  28  -8   0    0.30    0.09
 -28  -8   0    0.31    0.06
  28   8   0    0.26    0.09
 -28   8   0    0.35    0.05
 -28   8   0    0.22    0.06
  30  -8   0   -0.10    0.09
 -30  -8   0   -0.04    0.05
  30   8   0   -0.06    0.08
 -30   8   0   -0.08    0.05
 -32  -8   0    1.16    0.10
  32  -8   0    0.96    0.13
  32   8   0    0.85    0.13
 -32   8   0    1.31    0.11
  34  -8   0   -0.17    0.09
 -34  -8   0    0.06    0.06
 -34   8   0   -0.08    0.06
  34   8   0    0.01    0.09
  36  -8   0   -0.09    0.10
 -36   8   0    0.02    0.06
  36   8   0    0.04    0.10
  38  -8   0   -0.16    0.10
  38   8   0    0.13    0.10
 -38   8   0    0.20    0.07
   1  -9   0    9.30    0.52
  -1  -9   0    9.55    0.51
  -1   9   0    9.13    0.48
   1   9   0    8.74    0.48
  -3  -9   0    9.37    0.51
   3  -9   0    8.98    0.52
  -3  -9   0    8.70    0.51
  -3   9   0    8.75    0.48
   3   9   0    9.55    0.48
   3   9   0    9.99    0.50
   3   9   0    8.95    0.49
   5  -9   0    6.93    0.42
  -5  -9   0    8.14    0.44
  -5  -9   0    6.98    0.41
   5   9   0    7.23    0.42
   5   9   0    6.95    0.39
   5   9   0    7.54    0.39
  -5   9   0    7.70    0.39
  -7  -9   0   23.49    1.32
  -7  -9   0   25.22    1.28
   7  -9   0   24.69    1.27
   7   9   0   21.91    1.26
   7   9   0   27.34    1.31
   7   9   0   24.97    1.27
  -7   9   0   22.63    1.27
  -7   9   0   23.36    1.26
  -9  -9   0    9.91    0.56
   9  -9   0   10.81    0.54
   9  -9   0   10.93    0.57
   9   9   0   10.10    0.54
  -9   9   0   11.02    0.54
   9   9   0    9.74    0.60
  -9   9   0    9.40    0.57
   9   9   0   10.73    0.55
  -9   9   0    9.56    0.54
  11  -9   0    0.09    0.07
 -11  -9   0    0.11    0.11
 -11  -9   0    0.03    0.05
  11  -9   0    0.12    0.03
 -11   9   0    0.14    0.04
 -11   9   0    0.11    0.08
 -11   9   0    0.10    0.02
  11   9   0    0.13    0.03
  11   9   0    0.18    0.10
  13  -9   0    6.77    0.36
 -13  -9   0    6.96    0.37
  13  -9   0    5.65    0.41
 -13   9   0    6.62    0.43
  13   9   0    6.45    0.35
 -13   9   0    7.05    0.35
 -13   9   0    6.22    0.36
  13   9   0    6.64    0.44
  13   9   0    6.71    0.37
 -15  -9   0    1.45    0.12
 -15  -9   0    1.17    0.21
  15  -9   0    1.58    0.21
  15   9   0    1.29    0.15
 -15   9   0    1.61    0.22
  15   9   0    1.96    0.10
  15   9   0    1.55    0.21
 -15   9   0    1.91    0.11
 -15   9   0    1.49    0.11
  17  -9   0    7.67    0.52
 -17  -9   0    8.03    0.43
 -17  -9   0    7.61    0.56
  17  -9   0    8.22    0.44
  17   9   0    7.84    0.42
  17   9   0    7.12    0.45
 -17   9   0    8.04    0.42
  17   9   0    8.96    0.56
 -17   9   0    7.98    0.43
 -17   9   0    7.96    0.54
 -19  -9   0    4.78    0.28
  19  -9   0    4.33    0.38
  19  -9   0    5.20    0.29
 -19  -9   0    4.57    0.42
 -19   9   0    4.54    0.27
 -19   9   0    5.30    0.27
 -19   9   0    4.32    0.40
  19   9   0    4.75    0.40
  19   9   0    5.20    0.27
  19   9   0    4.97    0.30
  21  -9   0    5.34    0.33
 -21  -9   0    5.15    0.46
  21  -9   0    5.61    0.44
 -21  -9   0    5.88    0.32
  21   9   0    5.88    0.31
 -21   9   0    5.66    0.31
  21   9   0    5.60    0.34
 -21   9   0    5.61    0.31
 -21   9   0    6.19    0.47
 -23  -9   0    5.34    0.30
  23  -9   0    5.69    0.32
  23  -9   0    5.08    0.42
  23   9   0    5.14    0.32
 -23   9   0    4.39    0.45
 -23   9   0    5.09    0.29
 -23   9   0    5.47    0.29
 -25  -9   0    1.22    0.11
 -25  -9   0    1.60    0.13
 -25   9   0    1.30    0.10
  25   9   0    1.46    0.16
 -25   9   0    1.19    0.09
 -27  -9   0   -0.02    0.05
  27  -9   0   -0.03    0.07
 -27   9   0    0.04    0.04
  27   9   0    0.08    0.08
 -27   9   0    0.04    0.05
  29  -9   0    0.33    0.10
 -29  -9   0    0.36    0.06
 -29   9   0    0.37    0.06
  29   9   0    0.22    0.09
 -31  -9   0    0.60    0.08
  31  -9   0    0.46    0.11
 -31   9   0    0.62    0.09
  31   9   0    0.54    0.11
  33  -9   0    0.46    0.11
 -33  -9   0    0.50    0.07
 -33   9   0    0.50    0.08
  33   9   0    0.44    0.11
  35  -9   0   -0.10    0.10
 -35   9   0    0.08    0.06
  37  -9   0   -0.13    0.10
  37   9   0   -0.02    0.09
 -37   9   0    0.03    0.07
  39   9   0    0.03    0.10
   0 -10   0   17.55    0.94
   0  10   0   17.27    0.91
   2 -10   0    1.40    0.15
  -2 -10   0    1.39    0.09
  -2 -10   0    1.40    0.12
   2  10   0    1.58    0.09
  -2  10   0    1.54    0.09
  -4 -10   0    0.36    0.08
  -4 -10   0    0.46    0.08
   4 -10   0    0.43    0.08
   4  10   0    0.41    0.06
   4  10   0    0.36    0.04
   4  10   0    0.41    0.05
  -4  10   0    0.43    0.05
  -6 -10   0   25.62    1.40
  -6 -10   0   28.89    1.43
  -6  10   0   25.15    1.38
   6  10   0   24.98    1.38
   6  10   0   29.21    1.42
   6  10   0   25.56    1.39
  -8 -10   0    2.20    0.21
  -8 -10   0    2.09    0.15
   8 -10   0    1.90    0.11
   8 -10   0    2.05    0.13
   8  10   0    2.01    0.14
   8  10   0    2.01    0.19
  -8  10   0    1.85    0.13
  -8  10   0    1.96    0.12
   8  10   0    2.07    0.12
  10 -10   0    2.84    0.19
  10 -10   0    2.58    0.15
 -10 -10   0    2.84    0.18
 -10  10   0    2.76    0.16
  10  10   0    2.64    0.16
  10  10   0    2.65    0.15
 -10  10   0    2.46    0.19
 -10  10   0    2.58    0.15
  10  10   0    2.23    0.23
  12 -10   0    0.92    0.12
 -12 -10   0    0.77    0.16
  12 -10   0    0.88    0.08
 -12 -10   0    0.60    0.10
  12  10   0    0.75    0.07
  12  10   0    0.68    0.15
 -12  10   0    0.81    0.08
  12  10   0    0.72    0.10
 -12  10   0    0.65    0.12
 -12  10   0    0.78    0.06
 -14 -10   0    1.36    0.12
  14 -10   0    1.55    0.12
  14 -10   0    1.04    0.16
 -14 -10   0    0.88    0.19
 -14  10   0    1.65    0.10
  14  10   0    1.39    0.19
  14  10   0    1.45    0.14
 -14  10   0    1.68    0.20
 -14  10   0    1.54    0.11
  14  10   0    1.61    0.10
 -16 -10   0    0.16    0.16
  16 -10   0    0.26    0.06
 -16 -10   0    0.08    0.06
  16 -10   0    0.14    0.12
 -16  10   0    0.16    0.05
  16  10   0    0.25    0.04
 -16  10   0    0.24    0.03
 -16  10   0    0.25    0.12
  16  10   0    0.23    0.07
  16  10   0    0.27    0.14
 -18 -10   0    3.46    0.21
  18 -10   0    3.44    0.32
  18 -10   0    3.26    0.22
 -18 -10   0    3.34    0.37
  18  10   0    3.75    0.20
  18  10   0    4.22    0.35
 -18  10   0    3.75    0.20
  18  10   0    3.41    0.24
 -18  10   0    3.61    0.33
 -18  10   0    3.44    0.20
 -20 -10   0    1.99    0.29
  20 -10   0    2.43    0.18
  20 -10   0    2.00    0.29
 -20 -10   0    2.48    0.16
  20  10   0    2.57    0.19
 -20  10   0    2.05    0.30
  20  10   0    2.36    0.30
 -20  10   0    2.50    0.15
  20  10   0    2.49    0.15
 -20  10   0    2.41    0.15
  22 -10   0    1.98    0.17
  22 -10   0    1.72    0.26
 -22  10   0    2.14    0.13
  22  10   0    1.88    0.17
 -22  10   0    1.55    0.26
  22  10   0    1.89    0.13
 -22  10   0    1.97    0.13
 -24 -10   0    1.72    0.13
  24 -10   0    1.55    0.17
  24  10   0    1.90    0.17
 -24  10   0    1.71    0.12
 -26 -10   0    0.09    0.05
  26 -10   0    0.15    0.08
  26  10   0    0.09    0.08
 -26  10   0    0.12    0.04
 -26  10   0    0.12    0.05
  28 -10   0    0.68    0.11
 -28 -10   0    0.99    0.11
 -28  10   0    0.94    0.09
  28  10   0    0.83    0.12
 -28  10   0    1.09    0.09
 -30 -10   0    0.45    0.07
  30 -10   0    0.25    0.10
 -30  10   0    0.57    0.09
  30  10   0    0.34    0.10
 -32 -10   0    0.07    0.06
  32 -10   0   -0.08    0.09
  32  10   0    0.11    0.09
 -32  10   0    0.04    0.06
  34 -10   0    0.24    0.11
 -34 -10   0    0.51    0.08
  34  10   0    0.48    0.11
 -34  10   0    0.56    0.08
 -36  10   0    0.12    0.07
  36  10   0   -0.12    0.09
 -38  10   0    0.20    0.07
  38  10   0   -0.04    0.09
   1 -11   0    8.04    0.44
  -1 -11   0    7.09    0.43
   1  11   0    7.94    0.41
  -1  11   0    7.76    0.41
  -3 -11   0   30.57    1.61
   3 -11   0   30.35    1.62
  -3 -11   0   32.68    1.60
  -3  11   0   29.44    1.59
   3  11   0   28.57    1.59
   3  11   0   31.04    1.59
  -5 -11   0    0.89    0.12
   5 -11   0    0.98    0.13
  -5 -11   0    1.33    0.14
   5  11   0    1.01    0.08
   5  11   0    1.10    0.07
   5  11   0    1.11    0.11
  -5  11   0    0.98    0.08
  -7 -11   0    5.78    0.36
   7 -11   0    5.88    0.39
  -7 -11   0    7.04    0.41
  -7  11   0    6.07    0.34
   7  11   0    6.75    0.38
   7  11   0    6.20    0.34
   7  11   0    6.19    0.34
   9 -11   0    1.38    0.17
  -9 -11   0    1.96    0.21
   9 -11   0    1.57    0.10
  -9 -11   0    1.18    0.13
  -9  11   0    1.70    0.10
   9  11   0    1.55    0.10
   9  11   0    1.78    0.18
   9  11   0    1.64    0.12
  11 -11   0    3.66    0.21
 -11 -11   0    3.63    0.24
  11 -11   0    3.84    0.25
 -11 -11   0    3.35    0.33
  11  11   0    3.85    0.22
 -11  11   0    4.26    0.22
  11  11   0    4.07    0.31
 -11  11   0    3.68    0.25
  11  11   0    4.02    0.23
 -11  11   0    4.05    0.22
 -13 -11   0    0.26    0.14
 -13 -11   0    0.09    0.07
  13 -11   0    0.06    0.04
  13 -11   0    0.02    0.08
  13  11   0    0.05    0.11
  13  11   0    0.09    0.03
 -13  11   0    0.18    0.09
 -13  11   0    0.00    0.04
  13  11   0    0.15    0.05
 -13  11   0    0.18    0.05
 -15 -11   0    2.07    0.28
  15 -11   0    2.43    0.17
 -15 -11   0    2.59    0.16
 -15  11   0    2.70    0.16
  15  11   0    2.84    0.27
  15  11   0    2.59    0.15
  15  11   0    2.75    0.18
 -15  11   0    2.50    0.16
 -15  11   0    2.95    0.26
 -17 -11   0    1.49    0.24
  17 -11   0    1.66    0.13
 -17 -11   0    1.62    0.13
  17  11   0    1.75    0.26
 -17  11   0    1.51    0.11
  17  11   0    1.62    0.11
  17  11   0    1.61    0.15
 -17  11   0    1.80    0.25
 -17  11   0    1.85    0.11
 -19 -11   0    0.17    0.16
  19 -11   0    0.09    0.14
  19 -11   0    0.19    0.06
 -19 -11   0    0.13    0.06
 -19  11   0    0.15    0.04
  19  11   0    0.05    0.14
  19  11   0    0.12    0.07
 -19  11   0    0.13    0.14
 -19  11   0    0.13    0.04
  19  11   0    0.14    0.04
  21 -11   0    0.12    0.07
 -21 -11   0    0.16    0.05
  21  11   0    0.18    0.04
 -21  11   0    0.26    0.05
 -21  11   0    0.25    0.05
 -23 -11   0    2.02    0.14
  23 -11   0    1.83    0.17
 -23  11   0    1.97    0.13
  23  11   0    2.00    0.13
  23  11   0    1.88    0.17
 -23  11   0    2.00    0.14
 -25 -11   0    1.20    0.11
  25 -11   0    0.77    0.13
  25  11   0    1.25    0.15
 -25  11   0    1.13    0.10
 -25  11   0    1.14    0.10
 -27 -11   0    0.00    0.06
  27  11   0   -0.03    0.08
 -27  11   0    0.00    0.05
 -27  11   0    0.02    0.04
 -29 -11   0    2.07    0.15
 -29  11   0    2.02    0.14
 -29  11   0    2.12    0.14
  29  11   0    2.13    0.19
 -31 -11   0    0.33    0.07
 -31  11   0    0.22    0.06
  31  11   0    0.24    0.10
 -33 -11   0    0.13    0.06
 -33  11   0    0.16    0.07
  33  11   0    0.22    0.10
 -35  11   0    0.80    0.11
  35  11   0    0.61    0.12
 -37  11   0    0.19    0.07
  37  11   0   -0.02    0.10
   0 -12   0    0.09    0.07
   0  12   0    0.09    0.04
   2 -12   0    9.17    0.52
  -2 -12   0    9.17    0.51
   2  12   0    8.95    0.48
  -2  12   0    8.98    0.48
  -4 -12   0   19.94    1.02
   4 -12   0   19.42    1.03
  -4 -12   0   19.62    1.01
  -4  12   0   17.44    0.99
   4  12   0   17.79    0.99
   4  12   0   19.72    1.00
  -6 -12   0   20.57    1.19
   6 -12   0   22.37    1.19
  -6 -12   0   21.05    1.17
  -6  12   0   22.06    1.15
   6  12   0   21.73    1.15
   6  12   0   24.02    1.18
  -8 -12   0    1.82    0.22
   8 -12   0    1.94    0.22
  -8 -12   0    2.00    0.17
  -8  12   0    2.32    0.13
   8  12   0    2.29    0.13
   8  12   0    2.08    0.19
 -10 -12   0    3.62    0.33
 -10 -12   0    2.61    0.18
  10 -12   0    2.61    0.26
  10  12   0    2.73    0.17
  10  12   0    2.56    0.16
  10  12   0    2.91    0.24
 -10  12   0    2.60    0.15
 -12 -12   0    1.32    0.13
  12 -12   0    1.27    0.13
 -12 -12   0    1.33    0.20
  12  12   0    1.27    0.18
  12  12   0    1.23    0.09
  12  12   0    1.34    0.12
 -12  12   0    1.06    0.13
 -12  12   0    1.24    0.10
  14 -12   0    1.55    0.18
 -14 -12   0    1.55    0.12
 -14 -12   0    1.51    0.22
 -14  12   0    1.61    0.11
  14  12   0    1.80    0.24
 -14  12   0    1.75    0.11
  14  12   0    1.56    0.14
 -14  12   0    1.70    0.19
  14  12   0    1.48    0.11
  16 -12   0    1.88    0.28
 -16 -12   0    2.61    0.32
 -16 -12   0    2.22    0.16
 -16  12   0    2.10    0.14
  16  12   0    2.36    0.17
  16  12   0    2.11    0.13
 -16  12   0    2.24    0.14
  16  12   0    2.12    0.26
 -18 -12   0    1.07    0.22
  18  12   0    1.65    0.24
 -18  12   0    1.40    0.11
  18  12   0    1.78    0.15
  18  12   0    1.60    0.10
 -18  12   0    1.38    0.11
 -20 -12   0    1.07    0.25
 -20 -12   0    1.72    0.13
  20  12   0    1.83    0.17
 -20  12   0    1.59    0.12
 -20  12   0    1.68    0.12
  20  12   0    1.74    0.12
 -22 -12   0    0.21    0.06
 -22  12   0    0.16    0.05
  22  12   0    0.21    0.08
 -22  12   0    0.16    0.05
  22  12   0    0.16    0.05
 -24 -12   0    0.62    0.09
 -24  12   0    0.61    0.09
  24  12   0    0.69    0.08
 -24  12   0    0.80    0.08
  24  12   0    0.68    0.11
 -26 -12   0    0.35    0.07
  26  12   0    0.31    0.10
 -26  12   0    0.34    0.07
 -26  12   0    0.37    0.05
 -28 -12   0    0.46    0.08
 -28  12   0    0.45    0.06
 -28  12   0    0.48    0.07
  28  12   0    0.54    0.11
 -30 -12   0    0.75    0.11
 -30  12   0    0.69    0.09
  30  12   0    0.51    0.11
 -32 -12   0    0.09    0.06
  32  12   0    0.01    0.09
 -32  12   0    0.02    0.06
  34  12   0    1.09    0.14
 -34  12   0    1.19    0.12
  36  12   0   -0.11    0.10
 -36  12   0    0.09    0.07
   1 -13   0    2.80    0.24
  -1 -13   0    3.33    0.22
   1  13   0    3.43    0.19
  -1  13   0    3.11    0.18
   3 -13   0   29.86    1.52
  -3  13   0   27.67    1.48
   3  13   0   27.66    1.48
   5 -13   0    1.32    0.18
  -5 -13   0    1.33    0.13
  -5 -13   0    1.12    0.15
  -5  13   0    1.59    0.10
   5  13   0    1.45    0.09
   5  13   0    1.40    0.10
   7 -13   0   11.43    0.67
  -7 -13   0   11.93    0.65
  -7  13   0   11.76    0.63
   7  13   0   12.49    0.66
   7  13   0   11.72    0.63
  -9 -13   0    4.91    0.30
  -9 -13   0    5.27    0.37
   9 -13   0    5.35    0.35
   9  13   0    5.12    0.28
   9  13   0    4.80    0.27
  -9  13   0    5.11    0.28
   9  13   0    4.86    0.34
 -11 -13   0    3.91    0.33
 -11 -13   0    3.76    0.24
  11 -13   0    4.02    0.28
 -11  13   0    3.71    0.22
  11  13   0    3.98    0.22
  11  13   0    3.78    0.23
  11  13   0    3.66    0.30
  13 -13   0    7.25    0.52
  13  13   0    8.67    0.47
  13  13   0    8.88    0.46
 -13  13   0    9.09    0.46
 -15 -13   0    0.56    0.18
 -15 -13   0    0.53    0.10
 -15  13   0    0.46    0.06
  15  13   0    0.51    0.16
  15  13   0    0.58    0.07
  15  13   0    0.50    0.08
 -17 -13   0    0.13    0.06
 -17 -13   0    0.22    0.17
  17  13   0    0.17    0.14
 -17  13   0    0.17    0.04
  17  13   0    0.22    0.07
  17  13   0    0.19    0.04
 -19 -13   0    2.49    0.33
 -19 -13   0    1.83    0.14
  19  13   0    1.88    0.26
  19  13   0    1.94    0.17
 -19  13   0    1.70    0.13
 -19  13   0    1.82    0.12
 -21 -13   0   -0.01    0.06
  21  13   0   -0.06    0.07
  21  13   0    0.00    0.04
 -21  13   0    0.01    0.05
 -21  13   0    0.01    0.04
 -23 -13   0    0.37    0.07
  23  13   0    0.37    0.06
 -23  13   0    0.32    0.06
 -23  13   0    0.33    0.05
  23  13   0    0.30    0.09
 -25 -13   0    0.41    0.07
  25  13   0    0.39    0.08
  25  13   0    0.42    0.10
 -25  13   0    0.24    0.07
 -25  13   0    0.37    0.06
 -27 -13   0    0.64    0.08
  27  13   0    0.50    0.11
 -27  13   0    0.59    0.08
 -27  13   0    0.66    0.08
 -29 -13   0    1.47    0.13
 -29  13   0    1.41    0.12
  29  13   0    1.28    0.18
 -29  13   0    1.56    0.12
 -31 -13   0    0.10    0.07
  31  13   0   -0.04    0.10
 -31  13   0    0.05    0.06
  33  13   0   -0.13    0.09
 -33  13   0   -0.01    0.06
  35  13   0   -0.07    0.10
   0 -14   0    9.04    0.51
   0  14   0    8.94    0.48
  -2 -14   0    5.13    0.35
   2 -14   0    5.75    0.35
  -2  14   0    5.88    0.31
   2  14   0    5.98    0.31
  -4 -14   0   11.53    0.63
   4 -14   0   12.02    0.65
   4  14   0   10.98    0.60
  -4  14   0   11.24    0.60
  -6 -14   0    0.95    0.14
  -6 -14   0    1.05    0.12
   6 -14   0    0.91    0.13
   6  14   0    1.16    0.08
  -6  14   0    1.10    0.09
   6  14   0    1.11    0.08
   8 -14   0    1.59    0.23
  -8 -14   0    1.41    0.16
  -8 -14   0    1.89    0.21
  -8  14   0    1.97    0.12
   8  14   0    1.86    0.16
   8  14   0    1.94    0.11
 -10 -14   0    8.47    0.60
  10 -14   0    9.88    0.54
  10  14   0    8.98    0.49
  12 -14   0   -0.30    0.12
 -12 -14   0   -0.04    0.14
 -12 -14   0   -0.13    0.07
 -12  14   0    0.01    0.04
  12  14   0    0.02    0.03
  14 -14   0    2.71    0.28
 -14 -14   0    3.02    0.21
 -14  14   0    3.25    0.18
 -16 -14   0    0.81    0.11
  16 -14   0    0.87    0.15
  16  14   0    0.65    0.09
 -16  14   0    0.83    0.08
  16  14   0    0.99    0.08
 -18 -14   0    0.04    0.06
 -18  14   0    0.08    0.05
  18  14   0    0.03    0.07
  18  14   0    0.06    0.04
 -20 -14   0    6.21    0.35
  20  14   0    6.46    0.34
  20  14   0    5.68    0.37
 -20  14   0    6.10    0.34
 -22 -14   0    0.12    0.06
  22  14   0    0.00    0.08
 -22  14   0    0.15    0.05
  22  14   0    0.14    0.05
 -24 -14   0    0.08    0.06
  24  14   0    0.02    0.05
 -24  14   0    0.05    0.05
  24  14   0   -0.03    0.08
 -26 -14   0    1.23    0.12
 -26  14   0    1.30    0.10
  26  14   0    0.88    0.13
 -28 -14   0    0.29    0.07
  28  14   0    0.08    0.09
 -28  14   0    0.37    0.06
 -30 -14   0    0.03    0.07
  30  14   0   -0.09    0.09
 -32 -14   0    0.07    0.09
   1 -15   0    2.58    0.24
  -1  15   0    3.04    0.17
   1  15   0    2.91    0.18
   3 -15   0    3.35    0.23
  -3 -15   0    2.83    0.23
  -3  15   0    3.60    0.18
   3  15   0    2.93    0.19
  -5 -15   0    4.76    0.31
   5 -15   0    4.62    0.33
  -5  15   0    5.27    0.28
   5  15   0    5.07    0.27
  -7 -15   0   -0.04    0.08
   7 -15   0   -0.07    0.12
   7  15   0    0.00    0.03
  -7  15   0   -0.07    0.04
   9 -15   0    0.27    0.10
  -9 -15   0    0.13    0.08
   9  15   0    0.25    0.05
  -9  15   0    0.20    0.04
 -11 -15   0    1.61    0.15
  11 -15   0    1.47    0.22
 -11  15   0    1.78    0.12
  11  15   0    1.69    0.11
 -13 -15   0   -0.03    0.05
  13 -15   0   -0.16    0.12
  13  15   0   -0.04    0.04
 -13  15   0    0.00    0.04
  15 -15   0    2.60    0.27
 -15 -15   0    2.45    0.19
  15  15   0    2.58    0.16
 -15  15   0    2.88    0.16
 -17 -15   0    0.09    0.07
  17 -15   0    0.07    0.13
  17  15   0    0.11    0.04
 -17  15   0    0.07    0.04
 -19 -15   0    0.16    0.07
  19 -15   0    0.24    0.12
  19  15   0    0.14    0.05
 -19  15   0    0.14    0.05
  19  15   0    0.00    0.08
 -21 -15   0    2.28    0.17
  21 -15   0    2.18    0.27
 -21  15   0    2.46    0.15
  21  15   0    2.43    0.16
  23 -15   0    0.54    0.18
 -23 -15   0    0.64    0.09
  23  15   0    0.55    0.07
 -23  15   0    0.70    0.08
  23  15   0    0.30    0.10
 -25 -15   0    0.87    0.11
  25 -15   0    1.07    0.21
 -25  15   0    0.95    0.10
  27 -15   0    0.70    0.20
 -27 -15   0    0.46    0.08
  27  15   0    0.22    0.10
 -27  15   0    0.41    0.07
  29 -15   0    0.28    0.19
 -29 -15   0    0.03    0.07
  29  15   0   -0.18    0.10
 -29  15   0    0.08    0.05
  31 -15   0    0.60    0.19
  33 -15   0    1.99    0.30
   0 -16   0   12.69    0.71
   0  16   0   12.85    0.68
  -2 -16   0    0.07    0.07
   2 -16   0   -0.04    0.10
  -2  16   0    0.09    0.03
   2  16   0    0.02    0.04
   4 -16   0    0.05    0.11
  -4 -16   0    0.08    0.07
  -4  16   0    0.08    0.04
   4  16   0    0.06    0.05
  -6 -16   0    8.42    0.51
   6 -16   0    9.46    0.54
  -6  16   0    9.02    0.48
   6  16   0    8.89    0.48
  -8 -16   0   -0.06    0.08
   8 -16   0   -0.03    0.12
   8  16   0    0.05    0.04
  -8  16   0   -0.01    0.04
  10 -16   0    0.18    0.10
 -10 -16   0    0.21    0.08
  10  16   0    0.25    0.05
 -10  16   0    0.20    0.05
  12 -16   0    0.46    0.12
 -12 -16   0    0.35    0.09
 -12  16   0    0.50    0.06
  12  16   0    0.47    0.06
 -14 -16   0    0.60    0.09
  14 -16   0    0.59    0.13
 -14  16   0    0.51    0.06
  14  16   0    0.55    0.08
 -16 -16   0   -0.01    0.07
  16 -16   0    0.08    0.14
 -16  16   0   -0.04    0.05
  16  16   0   -0.02    0.04
 -18 -16   0   -0.01    0.07
  18 -16   0   -0.05    0.14
  18  16   0    0.00    0.04
 -18  16   0    0.01    0.05
  20 -16   0    1.68    0.26
 -20 -16   0    2.05    0.15
  20  16   0    1.92    0.13
 -20  16   0    1.89    0.13
 -22 -16   0    0.27    0.08
  22 -16   0   -0.06    0.16
 -22  16   0    0.19    0.05
  22  16   0    0.23    0.06
  24 -16   0    2.08    0.27
 -24 -16   0    2.20    0.16
 -24  16   0    2.21    0.15
  24  16   0    2.14    0.15
  26 -16   0    2.09    0.26
 -26 -16   0    1.90    0.16
 -26  16   0    1.79    0.13
  28 -16   0    0.06    0.19
 -28 -16   0    0.12    0.07
 -28  16   0    0.16    0.06
  30 -16   0    0.68    0.20
  32 -16   0    1.16    0.22
   1 -17   0    7.11    0.44
  -1 -17   0    7.78    0.46
  -1  17   0    7.33    0.41
   1  17   0    8.05    0.41
   3 -17   0   -0.10    0.11
  -3 -17   0   -0.03    0.09
  -3  17   0    0.09    0.05
   3  17   0    0.10    0.05
   5 -17   0    1.38    0.20
  -5 -17   0    1.43    0.17
   5  17   0    1.59    0.12
  -5  17   0    1.71    0.12
  -7 -17   0    4.51    0.29
   7 -17   0    4.02    0.30
  -7  17   0    4.44    0.25
   7  17   0    4.51    0.25
  -9 -17   0    0.05    0.09
   9 -17   0    0.01    0.13
   9  17   0    0.21    0.05
  11 -17   0    0.43    0.15
 -11 -17   0    0.46    0.10
 -11  17   0    0.44    0.06
  11  17   0    0.49    0.06
 -13 -17   0    2.26    0.17
  13 -17   0    1.88    0.24
 -13  17   0    2.05    0.13
  13  17   0    2.08    0.13
  15 -17   0   -0.07    0.10
 -15 -17   0   -0.01    0.08
  15  17   0    0.02    0.04
 -15  17   0    0.01    0.03
  17 -17   0    1.71    0.25
 -17 -17   0    1.76    0.14
  17  17   0    1.95    0.13
 -17  17   0    1.91    0.13
  19 -17   0    0.18    0.16
 -19 -17   0    0.28    0.08
 -19  17   0    0.21    0.06
  19  17   0    0.34    0.06
  21 -17   0    0.38    0.18
 -21 -17   0    0.41    0.09
 -21  17   0    0.40    0.06
  21  17   0    0.41    0.06
 -23 -17   0    4.61    0.28
  23 -17   0    5.20    0.37
 -23  17   0    4.66    0.27
  23  17   0    4.59    0.27
  25 -17   0    0.27    0.18
 -25 -17   0    0.38    0.08
 -25  17   0    0.40    0.06
  27 -17   0    0.98    0.21
 -27 -17   0    0.78    0.11
 -27  17   0    0.67    0.09
  29 -17   0    0.24    0.18
 -29 -17   0    0.07    0.07
  31 -17   0    0.84    0.21
   0 -18   0    7.10    0.45
   0  18   0    7.65    0.40
   2 -18   0    0.79    0.14
  -2 -18   0    0.88    0.13
  -2  18   0    1.04    0.09
   2  18   0    1.07    0.09
  -4 -18   0    1.06    0.16
   4 -18   0    0.96    0.15
  -4  18   0    1.05    0.09
   4  18   0    0.98    0.08
  -6 -18   0    4.25    0.28
   6 -18   0    4.42    0.31
  -6  18   0    4.23    0.24
   6  18   0    3.92    0.23
   8 -18   0    1.46    0.17
  -8 -18   0    1.20    0.15
  -8  18   0    1.38    0.10
   8  18   0    1.51    0.11
  10 -18   0    1.85    0.22
 -10 -18   0    1.83    0.17
  10  18   0    1.86    0.12
 -10  18   0    2.03    0.13
 -12 -18   0   -0.07    0.08
  12 -18   0   -0.15    0.09
  12  18   0    0.04    0.05
 -12  18   0    0.00    0.05
 -14 -18   0    1.31    0.15
  14 -18   0    1.09    0.19
 -14  18   0    1.39    0.11
  14  18   0    1.49    0.11
  16 -18   0    1.87    0.25
 -16 -18   0    2.00    0.17
  16  18   0    2.03    0.14
 -16  18   0    1.94    0.14
 -18 -18   0    1.24    0.13
  18 -18   0    1.30    0.20
 -18  18   0    1.41    0.11
  18  18   0    1.37    0.11
  20 -18   0   -0.08    0.16
 -20 -18   0    0.08    0.08
 -20  18   0    0.10    0.05
  20  18   0    0.16    0.05
 -22 -18   0    0.35    0.08
  22 -18   0    0.37    0.14
 -22  18   0    0.24    0.05
  22  18   0    0.28    0.06
 -24 -18   0    0.10    0.07
 -24  18   0    0.09    0.05
  26 -18   0    0.08    0.18
 -26 -18   0    0.01    0.07
 -26  18   0   -0.04    0.05
  28 -18   0    0.18    0.17
 -28 -18   0    0.03    0.07
 -28  18   0    0.05    0.05
  -1 -19   0    0.30    0.11
   1 -19   0    0.47    0.12
   1  19   0    0.44    0.06
  -1  19   0    0.46    0.06
   3 -19   0    0.64    0.14
  -3 -19   0    0.61    0.10
  -3  19   0    0.61    0.07
   3  19   0    0.71    0.07
   5 -19   0    0.47    0.11
  -5 -19   0    0.35    0.11
  -5  19   0    0.39    0.06
   5  19   0    0.43    0.05
   7 -19   0    2.15    0.23
  -7 -19   0    2.07    0.19
  -7  19   0    2.32    0.15
   7  19   0    2.21    0.14
   9 -19   0    0.13    0.12
  -9 -19   0    0.24    0.08
  -9  19   0    0.30    0.05
   9  19   0    0.21    0.05
  11 -19   0    0.37    0.14
 -11 -19   0    0.38    0.08
 -11  19   0    0.32    0.05
  11  19   0    0.35    0.06
 -13 -19   0    0.08    0.07
  13 -19   0   -0.08    0.14
 -13  19   0    0.07    0.05
  13  19   0    0.05    0.05
 -15 -19   0    0.01    0.08
  15 -19   0   -0.08    0.11
  15  19   0    0.01    0.05
 -15  19   0    0.07    0.05
 -17 -19   0    1.66    0.15
  17 -19   0    1.66    0.25
 -17  19   0    1.62    0.12
  17  19   0    1.57    0.12
  19 -19   0    0.31    0.17
 -19 -19   0    0.27    0.08
  19  19   0    0.22    0.06
 -19  19   0    0.24    0.05
  21 -19   0    0.42    0.16
 -21 -19   0    0.40    0.08
 -21  19   0    0.29    0.06
  21  19   0    0.38    0.07
  23 -19   0    0.42    0.18
  23  19   0    0.15    0.06
 -25 -19   0    0.26    0.08
  25 -19   0    0.22    0.16
 -25  19   0    0.19    0.06
 -27 -19   0    0.16    0.07
  27 -19   0    0.35    0.16
 -27  19   0    0.09    0.05
   0 -20   0   -0.01    0.10
   0  20   0    0.15    0.04
  -2 -20   0    0.71    0.11
   2 -20   0    0.72    0.12
   2  20   0    0.92    0.09
  -2  20   0    0.85    0.08
  -4 -20   0    0.03    0.10
   4 -20   0    0.04    0.09
  -4  20   0    0.05    0.04
   4  20   0    0.05    0.04
  -6 -20   0   -0.14    0.10
   6 -20   0   -0.11    0.12
   6  20   0    0.02    0.05
  -6  20   0   -0.03    0.05
  -8 -20   0   -0.03    0.09
   8 -20   0   -0.05    0.12
   8  20   0    0.01    0.05
  -8  20   0    0.03    0.04
  10 -20   0    0.88    0.16
 -10 -20   0    0.96    0.14
 -10  20   0    1.06    0.10
  10  20   0    0.98    0.08
 -12 -20   0    1.54    0.16
  12 -20   0    1.33    0.19
  12  20   0    1.39    0.12
 -12  20   0    1.60    0.12
  14 -20   0   -0.04    0.10
 -14 -20   0    0.03    0.09
 -14  20   0    0.01    0.04
  14  20   0    0.00    0.04
  16 -20   0    0.23    0.15
 -16 -20   0    0.07    0.08
 -16  20   0    0.02    0.05
  16  20   0    0.07    0.05
  18 -20   0    2.88    0.28
 -18 -20   0    2.74    0.20
 -18  20   0    2.71    0.17
  18  20   0    2.65    0.17
 -20 -20   0    0.88    0.12
  20 -20   0    0.79    0.18
  20  20   0    0.55    0.07
  22 -20   0   -0.02    0.16
 -22  20   0    0.08    0.05
 -24 -20   0    0.77    0.11
  24 -20   0    0.99    0.20
 -24  20   0    0.56    0.07
  26 -20   0    0.37    0.18
 -26 -20   0    0.30    0.08
 -26  20   0    0.20    0.06
   1 -21   0    0.14    0.10
  -1 -21   0    0.08    0.08
  -3 -21   0    2.24    0.19
   3 -21   0    2.24    0.23
  -3  21   0    2.50    0.15
   3  21   0    2.26    0.14
   5 -21   0    0.64    0.13
  -5 -21   0    0.86    0.14
  -5  21   0    0.76    0.07
   5  21   0    0.89    0.09
  -7 -21   0    0.46    0.11
   7 -21   0    0.37    0.14
   7  21   0    0.36    0.06
  -7  21   0    0.37    0.06
  -9 -21   0    0.45    0.10
   9 -21   0    0.34    0.14
   9  21   0    0.41    0.06
  -9  21   0    0.40    0.06
  11 -21   0    0.96    0.18
 -11 -21   0    1.03    0.15
 -11  21   0    1.02    0.10
  11  21   0    1.03    0.10
  13 -21   0    0.31    0.14
 -13 -21   0    0.27    0.10
  13  21   0    0.21    0.04
 -13  21   0    0.18    0.06
 -15 -21   0    0.48    0.10
 -15  21   0    0.43    0.06
  15  21   0    0.37    0.06
  17 -21   0    0.17    0.15
  17  21   0    0.07    0.05
 -17  21   0    0.05    0.05
  19 -21   0    1.22    0.20
 -19 -21   0    1.44    0.14
 -19  21   0    1.06    0.11
  19  21   0    1.14    0.11
  21 -21   0    0.09    0.12
 -21 -21   0    0.07    0.07
 -21  21   0   -0.04    0.05
  21  21   0   -0.03    0.05
 -23 -21   0    0.15    0.08
  23 -21   0    0.22    0.16
 -23  21   0    0.03    0.05
   0 -22   0    0.88    0.15
   0  22   0    1.08    0.10
  -2 -22   0    2.40    0.22
   2 -22   0    2.45    0.24
  -2  22   0    2.74    0.17
   2  22   0    2.76    0.17
   4 -22   0    1.54    0.20
  -4 -22   0    1.50    0.18
   4  22   0    1.42    0.11
  -4  22   0    1.63    0.12
  -6 -22   0    2.38    0.20
   6 -22   0    1.86    0.20
  -6  22   0    2.40    0.15
   6  22   0    2.35    0.15
   8 -22   0    0.11    0.13
  -8 -22   0    0.21    0.10
  -8  22   0    0.15    0.04
   8  22   0    0.14    0.05
 -10 -22   0    2.00    0.16
  10 -22   0    1.93    0.27
  10  22   0    1.89    0.14
 -10  22   0    1.90    0.13
  12 -22   0   -0.02    0.13
  12  22   0    0.04    0.05
 -12  22   0    0.01    0.04
 -14 -22   0    0.27    0.09
  14 -22   0    0.31    0.15
  14  22   0    0.28    0.06
 -14  22   0    0.28    0.06
 -16 -22   0    0.26    0.09
  16 -22   0    0.17    0.15
  16  22   0    0.20    0.06
 -16  22   0    0.18    0.05
  18 -22   0    0.10    0.15
 -18 -22   0    0.12    0.08
 -18  22   0    0.07    0.05
  18  22   0   -0.07    0.05
 -20 -22   0    1.19    0.13
  20 -22   0    0.90    0.18
  20  22   0    0.87    0.10
 -20  22   0    0.82    0.10
  -1 -23   0    0.02    0.12
   1 -23   0    0.02    0.17
  -1  23   0    0.05    0.05
   1  23   0    0.08    0.05
   3 -23   0    1.67    0.20
  -3 -23   0    1.59    0.18
   3  23   0    1.59    0.12
   5 -23   0    1.08    0.15
  -5 -23   0    1.18    0.16
   5  23   0    1.31    0.11
  -5  23   0    1.12    0.09
  -7 -23   0    0.25    0.10
   7 -23   0    0.08    0.10
  -7  23   0    0.21    0.06
   7  23   0    0.17    0.06
  -9 -23   0    0.08    0.10
   9 -23   0    0.18    0.12
   9  23   0    0.10    0.05
  -9  23   0    0.12    0.05
 -11 -23   0    0.95    0.14
  11 -23   0    0.86    0.16
  11  23   0    0.77    0.09
  13 -23   0    0.32    0.14
 -13 -23   0    0.43    0.10
  13  23   0    0.22    0.06
 -13  23   0    0.26    0.06
 -15 -23   0    0.23    0.09
  15 -23   0    0.20    0.14
 -15  23   0    0.08    0.05
  15  23   0    0.11    0.06
  17 -23   0    0.30    0.14
 -17 -23   0    0.20    0.08
  17  23   0    0.04    0.06
   0 -24   0    0.13    0.11
   0  24   0    0.10    0.04
   2 -24   0    0.12    0.11
  -2 -24   0    0.04    0.11
  -2  24   0    0.03    0.05
   2  24   0    0.04    0.04
   4 -24   0    0.07    0.11
  -4 -24   0    0.22    0.11
  -4  24   0    0.08    0.06
   4  24   0    0.09    0.05
  -6 -24   0    1.48    0.16
   6 -24   0    1.41    0.19
  -6  24   0    1.32    0.11
   6  24   0    1.25    0.11
  -8 -24   0    0.33    0.10
   8 -24   0    0.01    0.11
   8  24   0    0.09    0.05
  -8  24   0    0.04    0.04
 -10 -24   0    0.55    0.11
  10 -24   0    0.34    0.14
  10  24   0    0.33    0.06
 -10  24   0    0.39    0.05
  12 -24   0    0.03    0.11
 -12 -24   0    0.17    0.09
 -12  24   0    0.07    0.05
  12  24   0   -0.01    0.05
  14 -24   0    0.22    0.14
 -14 -24   0    0.22    0.08
  14  24   0    0.04    0.05
 -14  24   0    0.05    0.05
  -1 -25   0    1.51    0.17
   1 -25   0    1.36    0.18
  -1  25   0    1.03    0.09
   1  25   0    1.19    0.11
   3 -25   0    0.25    0.12
  -3 -25   0    0.35    0.11
  -3  25   0    0.21    0.06
   3  25   0    0.15    0.05
   5 -25   0    0.11    0.11
  -5 -25   0    0.09    0.10
   5  25   0    0.06    0.04
  -5  25   0    0.05    0.05
   7 -25   0    1.19    0.18
  -7 -25   0    1.10    0.15
  -7  25   0    0.95    0.10
   7  25   0    0.90    0.10
   9 -25   0    0.04    0.12
  -9 -25   0    0.17    0.09
  -9  25   0   -0.01    0.05
   9  25   0   -0.01    0.04
  42   0  -1    0.11    0.09
  40   0  -1    1.00    0.13
  38   0  -1    0.08    0.10
 -36   0   1    0.01    0.06
  36   0  -1    0.11    0.09
 -34   0   1    3.08    0.19
  34   0  -1    2.99    0.23
 -32   0   1    0.55    0.07
  32   0  -1    0.52    0.10
 -30   0   1    0.53    0.07
  30   0  -1    0.48    0.10
 -28   0   1    6.06    0.33
  28   0  -1    6.07    0.37
 -26   0   1   -0.01    0.04
  26   0  -1   -0.05    0.08
 -26   0   1   -0.08    0.03
 -24   0   1    4.51    0.25
  24   0  -1    4.72    0.30
 -24   0   1    4.70    0.26
 -22   0   1    3.84    0.21
  22   0  -1    3.66    0.25
 -22   0   1    3.50    0.37
 -22   0   1    3.88    0.21
  22   0  -1    3.95    0.36
  20   0  -1    6.21    0.46
  20   0  -1    6.43    0.37
 -20   0   1    5.86    0.46
 -20   0   1    6.37    0.34
 -18   0   1    0.14    0.03
  18   0  -1    0.15    0.07
 -18   0   1    0.27    0.14
 -18   0   1    0.15    0.03
  18   0  -1    0.31    0.14
 -16   0   1    0.89    0.06
 -16   0   1    0.88    0.06
 -16   0   1    0.74    0.17
  16   0  -1    1.04    0.17
  16   0  -1    0.79    0.11
  14   0  -1    3.36    0.25
 -14   0   1    2.75    0.26
 -14   0   1    3.22    0.17
  14   0  -1    3.20    0.20
 -14   0   1    2.93    0.17
  12   0  -1    0.46    0.06
 -12   0   1    0.41    0.14
 -12   0   1    0.56    0.04
 -12   0   1    0.46    0.04
  12   0  -1    0.49    0.11
 -10   0   1   35.95    1.83
  10   0  -1   33.48    1.82
  10   0  -1   32.42    1.77
  -8   0   1    0.45    0.03
  -8   0   1    0.56    0.04
   8   0  -1    0.45    0.10
  -8   0   1    0.53    0.10
   8   0  -1    0.44    0.06
  -6   0   1    0.12    0.08
   6   0  -1    0.06    0.03
   6   0  -1    0.01    0.07
  -4   0   1  174.26   10.12
   4   0  -1  179.58   10.12
  -4   0   1  184.26    9.85
   4   0  -1  170.35    9.83
   2   0   1  595.07   29.88
  -2   0  -1  541.91   30.06
   4   0   1   26.59    1.47
  -4   0  -1   29.12    1.47
   6   0   1   16.13    0.89
  -6   0  -1   17.44    0.92
   6   0   1   17.25    0.93
  -8   0  -1  112.95    5.52
   8   0   1   97.71    5.51
 -10   0  -1   15.39    0.88
 -10   0  -1   15.74    0.81
  10   0   1   15.49    0.88
 -12   0  -1    5.50    0.29
  12   0   1    5.87    0.32
  12   0   1    5.74    0.39
 -12   0  -1    5.15    0.29
 -12   0  -1    5.54    0.39
 -14   0  -1    8.17    0.44
 -14   0  -1    8.24    0.44
  14   0   1    8.72    0.55
 -14   0  -1    8.20    0.54
  14   0   1    8.81    0.47
 -16   0  -1    4.73    0.24
  16   0   1    5.24    0.38
  16   0   1    4.58    0.27
 -16   0  -1    3.87    0.36
 -16   0  -1    4.45    0.25
 -18   0  -1    6.96    0.51
 -18   0  -1    7.03    0.39
 -18   0  -1    7.31    0.39
  18   0   1    7.54    0.42
  18   0   1    8.09    0.50
 -20   0  -1   -0.03    0.15
 -20   0  -1    0.07    0.02
 -20   0  -1    0.12    0.03
  20   0   1    0.04    0.07
  20   0   1    0.15    0.14
 -22   0  -1    2.12    0.13
  22   0   1    2.00    0.18
 -22   0  -1    2.16    0.26
 -22   0  -1    2.19    0.12
  22   0   1    2.32    0.29
 -24   0  -1    5.60    0.29
  24   0   1    5.04    0.33
 -24   0  -1    5.03    0.29
 -26   0  -1    6.09    0.33
  26   0   1    5.72    0.36
 -28   0  -1   -0.01    0.04
  28   0   1   -0.01    0.08
 -30   0  -1    0.58    0.08
  30   0   1    0.30    0.10
  32   0   1    0.09    0.09
 -32   0  -1    0.06    0.05
  34   0   1    5.59    0.37
 -34   0  -1    6.23    0.33
 -36   0  -1    0.38    0.07
  36   0   1    0.38    0.10
 -38   0  -1    0.00    0.06
  38   0   1    0.02    0.09
  40   0   1   -0.04    0.09
  41  -1  -1    0.33    0.10
  41   1  -1    0.40    0.10
  39  -1  -1    0.83    0.12
  39   1  -1    1.37    0.18
  37  -1  -1    0.05    0.09
  37   1  -1    0.05    0.09
 -35  -1   1    0.09    0.06
  35  -1  -1    0.05    0.09
  35   1  -1    0.20    0.09
 -35   1   1    0.05    0.06
  33  -1  -1    1.92    0.19
 -33  -1   1    2.15    0.15
 -33   1   1    2.06    0.14
  33   1  -1    2.05    0.19
  31  -1  -1    2.32    0.20
 -31  -1   1    2.32    0.16
  31   1  -1    2.58    0.21
 -31   1   1    2.38    0.16
  29  -1  -1    3.19    0.24
  29   1  -1    3.63    0.24
 -29   1   1    3.19    0.20
  27  -1  -1    1.25    0.15
 -27  -1   1    1.34    0.10
 -27  -1   1    1.08    0.09
  27   1  -1    1.47    0.16
 -27   1   1    1.30    0.09
 -27   1   1    1.38    0.10
 -25  -1   1    0.75    0.07
 -25  -1   1    0.77    0.07
  25  -1  -1    0.54    0.10
  25   1  -1    0.57    0.10
 -25   1   1    0.71    0.07
 -25   1   1    0.84    0.07
  23  -1  -1    0.35    0.17
  23  -1  -1    0.33    0.09
 -23  -1   1    0.44    0.05
 -23  -1   1    0.72    0.20
 -23  -1   1    0.39    0.04
 -23   1   1    0.50    0.15
  23   1  -1    0.41    0.08
 -23   1   1    0.40    0.06
 -23   1   1    0.43    0.06
  23   1  -1    0.58    0.18
 -21  -1   1    3.14    0.31
  21  -1  -1    3.32    0.30
 -21  -1   1    3.47    0.19
 -21  -1   1    3.49    0.19
  21  -1  -1    3.17    0.23
  21   1  -1    3.47    0.30
 -21   1   1    3.44    0.19
 -21   1   1    3.37    0.19
  21   1  -1    3.27    0.23
 -21   1   1    3.14    0.34
 -19  -1   1    0.10    0.03
  19  -1  -1    0.12    0.14
 -19  -1   1    0.08    0.03
  19  -1  -1    0.05    0.05
 -19  -1   1    0.05    0.13
 -19   1   1    0.18    0.14
 -19   1   1    0.09    0.03
  19   1  -1    0.01    0.13
  19   1  -1    0.12    0.05
 -19   1   1    0.11    0.03
  17  -1  -1    1.44    0.20
 -17  -1   1    1.26    0.21
 -17  -1   1    1.63    0.10
  17  -1  -1    1.72    0.14
 -17  -1   1    1.74    0.10
 -17   1   1    1.51    0.22
 -17   1   1    1.72    0.10
  17   1  -1    1.65    0.15
  17   1  -1    1.79    0.21
 -17   1   1    1.69    0.10
 -15  -1   1   12.75    0.89
 -15  -1   1   13.88    0.78
 -15  -1   1   14.37    0.78
  15  -1  -1   16.02    0.87
  15  -1  -1   15.24    0.80
  15   1  -1   16.03    0.80
 -15   1   1   14.30    0.78
  15   1  -1   15.30    0.86
 -15   1   1   16.13    0.87
  13  -1  -1   22.61    1.21
 -13  -1   1   21.50    1.22
 -13  -1   1   19.18    1.14
  13  -1  -1   22.93    1.15
 -13   1   1   21.15    1.22
  13   1  -1   23.48    1.21
 -11  -1   1   43.18    2.19
  11  -1  -1   39.90    2.13
  11  -1  -1   40.01    2.18
  11   1  -1   41.39    2.18
 -11   1   1   39.78    2.18
  11   1  -1   40.30    2.13
  -9  -1   1   12.35    0.65
  -9  -1   1   11.88    0.64
   9  -1  -1   12.75    0.70
   9  -1  -1   13.72    0.66
  -9  -1   1   12.07    0.71
   9   1  -1   11.37    0.65
   9   1  -1   12.49    0.70
  -9   1   1   12.29    0.70
  -9   1   1   11.80    0.64
  -9   1   1   12.45    0.64
   7  -1  -1   86.77    4.83
  -7  -1   1   95.63    4.84
  -7   1   1   90.07    4.84
   7   1  -1   97.29    4.84
   5  -1  -1    2.25    0.17
  -5  -1   1    2.10    0.17
   5  -1  -1    2.13    0.13
  -5  -1   1    2.44    0.12
  -5   1   1    2.40    0.12
   5   1  -1    2.20    0.13
   5   1  -1    2.13    0.18
   5   1  -1    2.45    0.12
  -5   1   1    2.14    0.16
  -5   1   1    2.36    0.12
   3  -1  -1  138.14    7.83
  -3  -1   1  119.49    7.40
  -3  -1   1  152.09    7.67
   3  -1  -1  135.36    7.48
  -3   1   1  127.45    7.72
  -3   1   1  133.40    7.49
   3   1  -1  134.91    7.49
  -3  -1  -1    3.59    0.20
  -3  -1  -1    3.30    0.17
   3  -1   1    3.42    0.18
   3  -1   1    3.15    0.20
   3   1   1    3.47    0.18
  -3   1  -1    3.28    0.17
   3   1   1    3.02    0.20
  -3   1  -1    3.02    0.17
   3   1   1    3.03    0.17
  -3   1  -1    3.92    0.20
   5  -1   1   28.07    1.45
  -5  -1  -1   26.67    1.45
   5   1   1   26.26    1.45
   5   1   1   28.11    1.43
  -7  -1  -1   13.70    0.72
   7  -1   1   13.35    0.72
   7  -1   1   14.21    0.77
  -7  -1  -1   12.86    0.76
   7   1   1   13.78    0.73
  -7   1  -1   13.21    0.72
   7   1   1   13.69    0.76
  -7   1  -1   14.99    0.77
   9  -1   1  174.70   11.27
  -9  -1  -1  185.43   11.10
  -9  -1  -1  168.12   11.05
   9  -1   1  189.93   11.03
  -9   1  -1  192.33   10.98
  -9   1  -1  188.70   11.35
   9   1   1  179.27   11.08
   9   1   1  195.07   11.51
 -11  -1  -1   14.56    0.85
  11  -1   1   15.03    0.84
 -11  -1  -1   13.99    0.78
  11  -1   1   15.35    0.79
 -11  -1  -1   15.38    0.78
 -11   1  -1   14.56    0.84
  11   1   1   15.06    0.79
  11   1   1   15.13    0.85
 -13  -1  -1   17.33    0.95
  13  -1   1   19.60    1.04
 -13  -1  -1   18.45    1.04
  13  -1   1   17.97    0.97
  13   1   1   18.24    0.97
 -13   1  -1   17.67    1.03
  13   1   1   19.49    1.04
 -13   1  -1   17.06    0.95
 -15  -1  -1    5.31    0.30
 -15  -1  -1    4.94    0.44
 -15  -1  -1    5.77    0.29
  15  -1   1    5.70    0.32
  15  -1   1    5.07    0.40
 -15   1  -1    5.62    0.29
  15   1   1    5.16    0.31
 -15   1  -1    5.57    0.29
 -15   1  -1    4.97    0.39
  15   1   1    5.53    0.41
 -17  -1  -1    0.32    0.05
  17  -1   1    0.21    0.07
  17  -1   1    0.34    0.15
 -17  -1  -1    0.30    0.04
 -17  -1  -1    0.30    0.14
 -17   1  -1    0.31    0.03
  17   1   1    0.32    0.12
 -17   1  -1    0.34    0.05
 -17   1  -1    0.34    0.14
  17   1   1    0.24    0.07
 -19  -1  -1    6.56    0.49
 -19  -1  -1    6.08    0.36
 -19  -1  -1    6.88    0.36
  19  -1   1    7.26    0.40
  19  -1   1    6.83    0.48
  19   1   1    7.05    0.49
  19   1   1    6.98    0.39
 -19   1  -1    6.94    0.49
 -19   1  -1    6.96    0.36
 -19   1  -1    6.38    0.36
 -21  -1  -1    1.80    0.11
  21  -1   1    1.83    0.16
 -21  -1  -1    1.70    0.11
 -21  -1  -1    2.09    0.29
  21  -1   1    2.02    0.28
  21   1   1    1.93    0.28
  21   1   1    1.63    0.15
 -21   1  -1    1.75    0.25
 -21   1  -1    1.94    0.12
 -21   1  -1    1.81    0.11
 -23  -1  -1    2.16    0.13
 -23  -1  -1    1.97    0.28
 -23  -1  -1    2.09    0.13
  23  -1   1    2.13    0.29
  23  -1   1    2.20    0.18
 -23   1  -1    2.05    0.30
 -23   1  -1    2.30    0.13
  23   1   1    2.13    0.19
  23   1   1    2.34    0.30
 -23   1  -1    2.29    0.14
  25  -1   1   10.33    0.57
 -25  -1  -1   10.23    0.54
 -25   1  -1   10.12    0.54
  25   1   1    9.95    0.57
  27  -1   1    0.00    0.08
 -27  -1  -1    0.10    0.05
  27   1   1    0.10    0.08
 -27   1  -1    0.13    0.05
  29  -1   1    0.51    0.11
 -29  -1  -1    0.62    0.08
 -29   1  -1    0.70    0.08
  29   1   1    0.59    0.11
  31  -1   1    0.07    0.09
 -31  -1  -1    0.00    0.05
 -31   1  -1    0.01    0.05
  31   1   1   -0.08    0.09
 -33  -1  -1    8.21    0.45
  33  -1   1    8.34    0.48
  33   1   1    8.10    0.48
 -33   1  -1    8.03    0.45
 -35  -1  -1    0.54    0.08
  35  -1   1    0.41    0.10
 -35   1  -1    0.55    0.08
  35   1   1    0.55    0.11
  37  -1   1    0.21    0.10
 -37  -1  -1    0.24    0.07
  37   1   1    0.19    0.10
 -37   1  -1    0.23    0.07
  39  -1   1    0.07    0.09
  39   1   1    0.06    0.09
  41  -1   1    0.40    0.11
  41   1   1    0.49    0.11
  40  -2  -1    0.02    0.09
  40   2  -1    0.11    0.09
  38  -2  -1    0.19    0.10
  38   2  -1    0.24    0.10
  36  -2  -1   -0.05    0.09
 -36   2   1    0.01    0.06
  36   2  -1    0.04    0.09
 -34  -2   1    0.71    0.09
  34  -2  -1    0.51    0.11
 -34   2   1    0.76    0.10
  34   2  -1    0.62    0.11
 -32  -2   1    1.79    0.13
  32  -2  -1    1.88    0.18
  32   2  -1    1.64    0.17
 -32   2   1    1.76    0.13
  30  -2  -1    0.32    0.09
 -30  -2   1    0.37    0.06
  30   2  -1    0.24    0.09
 -30   2   1    0.36    0.06
 -28  -2   1    0.72    0.08
  28  -2  -1    0.66    0.10
  28   2  -1    0.58    0.10
 -28   2   1    0.83    0.08
 -26  -2   1    0.42    0.06
  26  -2  -1    0.23    0.08
 -26  -2   1    0.27    0.05
  26   2  -1    0.26    0.09
 -26   2   1    0.34    0.04
 -26   2   1    0.38    0.05
  24  -2  -1   10.18    0.77
 -24  -2   1   12.11    0.60
  24  -2  -1   11.59    0.63
 -24  -2   1   11.50    0.61
  24   2  -1   10.43    0.64
 -24   2   1   10.91    0.75
 -24   2   1   11.64    0.60
 -24   2   1   12.11    0.61
 -22  -2   1   -0.04    0.12
 -22  -2   1    0.08    0.04
  22  -2  -1    0.15    0.15
 -22  -2   1    0.04    0.03
  22  -2  -1    0.01    0.07
  22   2  -1    0.01    0.08
 -22   2   1    0.09    0.15
 -22   2   1    0.04    0.04
  22   2  -1    0.06    0.12
 -22   2   1    0.06    0.03
  20  -2  -1    2.51    0.29
 -20  -2   1    2.45    0.31
  20  -2  -1    2.30    0.19
 -20  -2   1    2.45    0.15
 -20   2   1    2.69    0.15
 -20   2   1    2.15    0.30
  20   2  -1    2.19    0.29
  20   2  -1    2.33    0.18
 -20   2   1    2.61    0.14
  18  -2  -1    8.94    0.57
 -18  -2   1    9.58    0.46
 -18  -2   1    8.36    0.46
 -18  -2   1    7.27    0.57
  18  -2  -1    8.57    0.48
  18   2  -1    8.81    0.48
 -18   2   1    8.06    0.45
 -18   2   1    8.34    0.57
  18   2  -1    9.06    0.57
 -18   2   1    8.81    0.46
  16  -2  -1    8.86    0.49
 -16  -2   1    8.13    0.57
 -16  -2   1    8.54    0.47
  16  -2  -1    9.07    0.56
 -16  -2   1    8.73    0.47
 -16   2   1    8.76    0.47
 -16   2   1    9.16    0.57
 -16   2   1    8.61    0.46
  16   2  -1    9.36    0.57
  16   2  -1    9.14    0.49
 -14  -2   1    6.06    0.31
 -14  -2   1    5.65    0.30
  14  -2  -1    5.52    0.32
 -14  -2   1    5.00    0.41
  14  -2  -1    5.48    0.39
 -14   2   1    5.99    0.30
  14   2  -1    6.04    0.33
 -14   2   1    4.75    0.39
  12  -2  -1    1.31    0.11
  12  -2  -1    1.34    0.18
 -12  -2   1    1.44    0.08
 -12  -2   1    1.45    0.09
 -12   2   1    1.20    0.08
 -12   2   1    1.45    0.08
 -12   2   1    1.05    0.17
  12   2  -1    1.30    0.16
  12   2  -1    1.22    0.12
  10  -2  -1    1.79    0.13
 -10  -2   1    1.44    0.21
  10  -2  -1    2.07    0.19
 -10  -2   1    1.79    0.11
 -10   2   1    2.05    0.10
  10   2  -1    1.59    0.19
 -10   2   1    1.91    0.10
  10   2  -1    1.92    0.10
  10   2  -1    1.87    0.13
 -10   2   1    1.86    0.21
   8  -2  -1    0.99    0.14
   8  -2  -1    1.08    0.09
  -8  -2   1    1.09    0.07
  -8  -2   1    0.80    0.12
   8   2  -1    0.98    0.15
  -8   2   1    1.18    0.06
   8   2  -1    1.05    0.09
  -8   2   1    1.00    0.15
   8   2  -1    1.15    0.06
  -8   2   1    1.20    0.07
   6  -2  -1   30.65    1.62
  -6  -2   1   29.73    1.63
   6   2  -1   29.75    1.63
  -6   2   1   33.01    1.63
   6   2  -1   30.16    1.60
   4  -2  -1    1.44    0.13
  -4  -2   1    2.07    0.10
   4  -2  -1    1.97    0.11
  -4  -2   1    1.91    0.15
   4   2  -1    1.84    0.10
   4   2  -1    1.58    0.14
  -4   2   1    1.43    0.14
   4   2  -1    1.65    0.11
  -4   2   1    2.06    0.10
  -4   2   1    1.92    0.10
   2  -2  -1    0.01    0.02
   2  -2  -1    0.00    0.01
  -2  -2   1   -0.01    0.04
  -2  -2   1    0.04    0.02
  -2   2   1   -0.01    0.01
  -2   2   1   -0.03    0.03
   2   2  -1   -0.01    0.01
   2   2  -1    0.00    0.01
  -2   2   1    0.01    0.01
   2   2  -1    0.00    0.03
   0  -2  -1    0.58    0.03
   0  -2   1    0.59    0.04
   0  -2  -1    0.59    0.05
   0  -2  -1    0.48    0.04
   0   2   1    0.54    0.05
   0   2  -1    0.56    0.03
   0   2  -1    0.56    0.04
   0   2   1    0.57    0.03
   0   2  -1    0.61    0.03
   0   2  -1    0.58    0.03
  -2  -2  -1   85.28    4.84
   2  -2   1   81.08    4.59
   2  -2   1   84.68    4.80
  -2  -2  -1   74.22    4.90
   2   2   1   81.02    4.95
  -2   2  -1   87.38    4.80
   2   2   1   88.03    4.88
  -2   2  -1   74.19    4.55
  -4  -2  -1    1.34    0.08
   4  -2   1    1.44    0.13
   4  -2   1    1.39    0.08
  -4  -2  -1    1.10    0.13
   4   2   1    1.31    0.09
  -4   2  -1    1.32    0.07
   4   2   1    1.28    0.07
   4   2   1    1.16    0.14
  -4   2  -1    1.32    0.07
  -4   2  -1    1.32    0.12
  -6  -2  -1   17.03    0.91
   6  -2   1   17.62    0.91
   6  -2   1   16.89    0.87
  -6  -2  -1   15.15    0.87
   6   2   1   16.24    0.87
   6   2   1   17.09    0.91
  -6   2  -1   16.45    0.90
   8  -2   1    5.24    0.34
  -8  -2  -1    5.08    0.27
  -8  -2  -1    5.03    0.35
   8  -2   1    5.09    0.29
  -8   2  -1    4.99    0.27
   8   2   1    5.57    0.29
   8   2   1    5.32    0.35
   8   2   1    5.19    0.27
  -8   2  -1    5.35    0.33
  -8   2  -1    4.99    0.27
  10  -2   1   23.74    1.18
  10  -2   1   23.43    1.23
 -10  -2  -1   21.89    1.23
  10   2   1   22.86    1.24
  10   2   1   22.55    1.18
 -10   2  -1   20.09    1.22
 -12  -2  -1   12.28    0.74
 -12  -2  -1   12.03    0.65
  12  -2   1   14.29    0.67
 -12  -2  -1   11.40    0.65
  12  -2   1   11.67    0.73
 -12   2  -1   12.35    0.65
 -12   2  -1   11.92    0.65
  12   2   1   13.00    0.67
  12   2   1   13.16    0.74
 -12   2  -1   12.00    0.72
  14  -2   1    5.60    0.40
 -14  -2  -1    4.93    0.39
 -14  -2  -1    5.46    0.29
  14  -2   1    4.91    0.31
 -14  -2  -1    5.02    0.28
  14   2   1    5.19    0.31
 -14   2  -1    5.37    0.39
  14   2   1    5.48    0.40
 -14   2  -1    5.69    0.28
 -16  -2  -1    2.05    0.24
  16  -2   1    2.14    0.24
  16  -2   1    2.28    0.18
 -16  -2  -1    2.60    0.13
 -16  -2  -1    2.38    0.14
 -16   2  -1    2.44    0.13
 -16   2  -1    2.47    0.14
 -16   2  -1    2.16    0.27
  16   2   1    2.23    0.27
  16   2   1    2.56    0.18
 -18  -2  -1    0.68    0.06
 -18  -2  -1    0.45    0.16
 -18  -2  -1    0.64    0.05
  18  -2   1    0.50    0.09
  18  -2   1    0.49    0.16
 -18   2  -1    0.47    0.16
  18   2   1    0.50    0.08
 -18   2  -1    0.78    0.06
  18   2   1    0.57    0.16
 -18   2  -1    0.62    0.05
 -20  -2  -1    0.77    0.07
  20  -2   1    0.57    0.09
  20  -2   1    0.65    0.17
 -20  -2  -1    0.68    0.19
 -20  -2  -1    0.75    0.06
 -20   2  -1    0.71    0.05
  20   2   1    0.44    0.09
 -20   2  -1    0.78    0.07
  20   2   1    0.79    0.18
 -20   2  -1    0.48    0.16
  22  -2   1    9.93    0.53
 -22  -2  -1    8.51    0.64
 -22  -2  -1    9.22    0.50
 -22  -2  -1    9.36    0.49
  22  -2   1    9.43    0.62
 -22   2  -1    9.39    0.50
  22   2   1    9.76    0.63
 -22   2  -1    8.67    0.62
 -22   2  -1    9.21    0.50
  22   2   1    9.74    0.53
 -24  -2  -1    0.03    0.03
  24  -2   1    0.21    0.08
 -24  -2  -1    0.13    0.04
 -24   2  -1    0.18    0.13
 -24   2  -1    0.11    0.03
 -24   2  -1    0.20    0.05
  26  -2   1    3.76    0.26
 -26  -2  -1    3.76    0.22
 -26   2  -1    3.97    0.22
  26   2   1    3.85    0.27
  28  -2   1    0.02    0.08
 -28  -2  -1    0.06    0.04
 -28   2  -1    0.04    0.05
  28   2   1    0.05    0.08
 -30  -2  -1    3.84    0.23
  30  -2   1    4.13    0.28
  30   2   1    3.74    0.27
 -30   2  -1    4.08    0.23
 -32  -2  -1    0.02    0.05
  32  -2   1    0.11    0.09
 -32   2  -1    0.01    0.05
  32   2   1    0.01    0.08
 -34  -2  -1    2.02    0.14
  34  -2   1    1.96    0.19
  34   2   1    2.11    0.19
 -34   2  -1    2.14    0.15
 -36  -2  -1    0.00    0.06
  36  -2   1    0.01    0.09
 -36   2  -1   -0.03    0.06
  36   2   1    0.00    0.09
 -38  -2  -1    0.31    0.07
  38  -2   1    0.23    0.10
 -38   2  -1    0.28    0.07
  38   2   1    0.24    0.10
  40  -2   1   -0.03    0.10
  40   2   1    0.06    0.09
  41  -3  -1    0.44    0.11
  41   3  -1    0.63    0.11
  39  -3  -1    0.09    0.09
  39   3  -1    0.07    0.09
  37  -3  -1    0.09    0.10
  37   3  -1    0.10    0.11
 -35  -3   1    0.09    0.06
  35  -3  -1   -0.04    0.09
 -35   3   1    0.02    0.06
  35   3  -1    0.04    0.09
 -33  -3   1    1.42    0.12
  33  -3  -1    1.71    0.19
 -33   3   1    1.66    0.13
  33   3  -1    1.47    0.17
  31  -3  -1    0.17    0.08
 -31  -3   1    0.04    0.05
 -31   3   1    0.04    0.05
  31   3  -1    0.18    0.08
 -29  -3   1    2.27    0.17
  29  -3  -1    2.69    0.21
  29   3  -1    2.66    0.21
 -29   3   1    2.61    0.16
 -27  -3   1    3.61    0.20
 -27  -3   1    3.78    0.22
  27  -3  -1    3.14    0.24
  27   3  -1    2.96    0.24
 -27   3   1    3.58    0.20
 -27   3   1    3.42    0.19
 -25  -3   1   -0.01    0.04
 -25  -3   1   -0.08    0.03
 -25   3   1    0.01    0.03
  25   3  -1    0.04    0.08
 -25   3   1   -0.03    0.04
  23  -3  -1    0.54    0.17
 -23  -3   1    0.73    0.07
 -23  -3   1    0.59    0.19
 -23  -3   1    0.80    0.07
  23  -3  -1    0.61    0.09
  23   3  -1    0.65    0.10
  23   3  -1    0.59    0.18
 -23   3   1    0.76    0.07
 -23   3   1    0.84    0.06
 -23   3   1    0.67    0.19
  21  -3  -1    7.16    0.40
  21  -3  -1    6.76    0.49
 -21  -3   1    7.13    0.37
 -21  -3   1    6.37    0.49
 -21  -3   1    6.77    0.37
 -21   3   1    6.43    0.36
 -21   3   1    6.19    0.50
  21   3  -1    6.77    0.40
  21   3  -1    7.22    0.50
 -21   3   1    6.94    0.37
 -19  -3   1    1.38    0.09
  19  -3  -1    1.12    0.14
 -19  -3   1    1.64    0.10
  19  -3  -1    1.30    0.20
 -19  -3   1    1.35    0.22
 -19   3   1    1.40    0.09
  19   3  -1    1.39    0.21
 -19   3   1    1.40    0.09
  19   3  -1    1.24    0.14
 -19   3   1    1.02    0.20
 -17  -3   1   12.15    0.64
  17  -3  -1   11.28    0.73
 -17  -3   1   12.31    0.64
  17  -3  -1   11.80    0.66
 -17  -3   1   12.60    0.75
 -17   3   1   12.36    0.64
  17   3  -1   13.12    0.74
 -17   3   1   11.31    0.73
 -17   3   1   11.03    0.63
  17   3  -1   13.04    0.66
  15  -3  -1    0.21    0.06
 -15  -3   1    0.25    0.04
 -15  -3   1    0.27    0.04
 -15  -3   1    0.23    0.13
  15   3  -1    0.21    0.10
 -15   3   1    0.31    0.13
 -15   3   1    0.28    0.04
  15   3  -1    0.23    0.06
  13  -3  -1    1.77    0.13
 -13  -3   1    1.79    0.11
  13  -3  -1    1.43    0.20
 -13  -3   1    1.55    0.20
 -13   3   1    1.86    0.10
 -13   3   1    2.00    0.11
  13   3  -1    1.61    0.21
  13   3  -1    1.81    0.14
 -11  -3   1    0.32    0.04
  11  -3  -1    0.29    0.10
  11  -3  -1    0.21    0.05
 -11  -3   1    0.26    0.12
  11   3  -1    0.30    0.03
  11   3  -1    0.17    0.11
 -11   3   1    0.23    0.11
 -11   3   1    0.25    0.03
  11   3  -1    0.16    0.05
  -9  -3   1   32.44    1.72
   9  -3  -1   29.45    1.67
  -9   3   1   32.47    1.71
   9   3  -1   34.53    1.72
   9   3  -1   30.77    1.67
  -7  -3   1   91.39    4.53
  -7   3   1   79.18    4.51
   7   3  -1   88.19    4.52
  -5  -3   1   83.99    4.08
  -5   3   1   71.70    4.06
   3  -3  -1    4.72    0.25
  -3  -3   1    4.70    0.27
   3  -3  -1    4.54    0.24
  -3  -3   1    4.66    0.24
  -3   3   1    4.43    0.24
  -3   3   1    3.96    0.25
   3   3  -1    4.68    0.24
   3   3  -1    4.30    0.24
   3   3  -1    4.22    0.26
  -3   3   1    4.63    0.24
  -1  -3   1  176.43    9.41
  -1  -3   1  186.41    9.32
   1  -3  -1  162.61    9.65
   1  -3  -1  162.93    9.38
   1   3  -1  168.71    9.42
  -1   3   1  163.62    9.71
   1   3  -1  162.61    9.29
  -1  -3  -1    7.82    0.39
  -1  -3  -1    8.38    0.39
   1  -3   1    7.06    0.38
   1  -3   1    6.41    0.38
  -1   3  -1    6.95    0.38
   1   3   1    7.27    0.38
  -1   3  -1    7.39    0.38
   1   3   1    6.81    0.39
   1   3   1    7.19    0.38
  -3  -3  -1   39.17    2.15
  -3   3  -1   42.26    2.14
   3   3   1   41.37    2.15
   5  -3   1   51.58    2.43
  -5  -3  -1   42.50    2.43
  -5   3  -1   42.66    2.42
   5   3   1   48.02    2.44
   7  -3   1   13.00    0.65
  -7  -3  -1   11.45    0.69
   7  -3   1   11.70    0.68
  -7  -3  -1   11.66    0.64
   7   3   1   13.06    0.65
  -7   3  -1   12.06    0.64
   7   3   1   12.84    0.69
  -7   3  -1   12.48    0.64
  -7   3  -1   11.72    0.68
   9  -3   1   17.16    0.84
  -9  -3  -1   16.19    0.83
  -9  -3  -1   15.80    0.89
   9  -3   1   13.87    0.88
   9   3   1   16.40    0.84
   9   3   1   15.63    0.89
  -9   3  -1   16.13    0.89
 -11  -3  -1    0.52    0.05
 -11  -3  -1    0.41    0.13
  11  -3   1    0.43    0.06
  11  -3   1    0.54    0.12
  11   3   1    0.43    0.12
 -11   3  -1    0.46    0.12
  11   3   1    0.60    0.04
  11   3   1    0.45    0.07
 -11   3  -1    0.60    0.04
 -13  -3  -1   13.03    0.78
  13  -3   1   15.15    0.78
  13  -3   1   12.36    0.71
 -13  -3  -1   12.43    0.69
  13   3   1   14.07    0.71
  13   3   1   14.22    0.79
 -13   3  -1   12.39    0.77
 -13   3  -1   12.35    0.69
 -13   3  -1   13.08    0.69
  15  -3   1    0.18    0.13
 -15  -3  -1    0.14    0.13
 -15  -3  -1    0.07    0.02
  15  -3   1    0.05    0.06
 -15  -3  -1    0.07    0.03
 -15   3  -1    0.01    0.12
  15   3   1    0.06    0.13
 -15   3  -1    0.12    0.03
 -15   3  -1    0.07    0.02
  15   3   1    0.08    0.06
 -17  -3  -1    2.80    0.15
  17  -3   1    2.56    0.19
  17  -3   1    2.25    0.27
 -17  -3  -1    2.51    0.29
 -17  -3  -1    2.57    0.15
  17   3   1    2.62    0.29
 -17   3  -1    2.53    0.14
  17   3   1    2.56    0.19
 -17   3  -1    2.61    0.15
 -17   3  -1    2.51    0.28
  19  -3   1    0.54    0.09
 -19  -3  -1    0.76    0.07
  19  -3   1    0.65    0.17
 -19  -3  -1    0.98    0.20
 -19   3  -1    0.82    0.06
  19   3   1    0.73    0.18
  19   3   1    0.55    0.09
 -19   3  -1    0.72    0.07
 -19   3  -1    0.52    0.17
 -21  -3  -1    3.88    0.21
 -21  -3  -1    3.49    0.20
 -21  -3  -1    3.41    0.37
  21  -3   1    3.76    0.35
  21  -3   1    3.57    0.24
  21   3   1    3.73    0.24
 -21   3  -1    3.53    0.35
 -21   3  -1    3.60    0.21
  21   3   1    3.77    0.36
 -23  -3  -1    0.04    0.04
  23  -3   1    0.07    0.08
  23  -3   1   -0.10    0.15
 -23  -3  -1   -0.04    0.03
 -23  -3  -1    0.25    0.16
 -23   3  -1    0.04    0.03
 -23   3  -1    0.02    0.14
  23   3   1    0.09    0.16
  23   3   1    0.10    0.06
 -23   3  -1    0.00    0.04
  25  -3   1    1.19    0.15
 -25  -3  -1    1.10    0.09
 -25   3  -1    1.36    0.09
 -25   3  -1    1.29    0.10
  25   3   1    1.16    0.13
 -27  -3  -1    2.45    0.16
  27  -3   1    2.38    0.21
  27   3   1    2.46    0.21
 -27   3  -1    2.83    0.16
  29  -3   1    0.20    0.09
 -29  -3  -1    0.33    0.05
  29   3   1    0.31    0.09
 -29   3  -1    0.28    0.05
 -31  -3  -1    0.95    0.09
  31  -3   1    1.25    0.15
  31   3   1    0.73    0.11
 -31   3  -1    0.92    0.09
  33  -3   1    0.36    0.10
 -33  -3  -1    0.30    0.06
 -33   3  -1    0.33    0.06
  33   3   1    0.23    0.09
 -35  -3  -1    0.08    0.06
  35  -3   1    0.01    0.09
 -35   3  -1    0.03    0.05
  35   3   1   -0.04    0.09
 -37  -3  -1    1.76    0.14
  37  -3   1    1.91    0.19
 -37   3  -1    1.72    0.14
  39  -3   1    0.16    0.10
  39   3   1    0.22    0.10
 -39   3  -1    0.16    0.08
  41  -3   1    0.07    0.10
  41   3   1    0.02    0.09
  40  -4  -1    0.60    0.12
  40   4  -1    0.41    0.10
  38  -4  -1    0.04    0.10
  38   4  -1    0.10    0.09
  36  -4  -1    0.64    0.12
 -36   4   1    0.64    0.09
  36   4  -1    0.58    0.11
  34  -4  -1    0.00    0.09
 -34  -4   1    0.04    0.06
  34   4  -1    0.01    0.09
 -34   4   1    0.06    0.05
  32  -4  -1    3.03    0.24
 -32  -4   1    2.89    0.18
 -32   4   1    2.97    0.18
  32   4  -1    2.88    0.22
  30  -4  -1    3.90    0.26
 -30  -4   1    3.54    0.22
 -30   4   1    3.61    0.22
  30   4  -1    3.89    0.25
  28  -4  -1    0.08    0.08
 -28  -4   1    0.08    0.05
 -28   4   1    0.05    0.05
  28   4  -1   -0.02    0.08
 -28   4   1    0.15    0.04
 -26  -4   1   -0.05    0.04
  26  -4  -1    0.08    0.08
 -26  -4   1    0.03    0.04
  26   4  -1    0.04    0.08
 -26   4   1    0.05    0.04
 -26   4   1    0.08    0.03
  24  -4  -1    0.51    0.18
 -24  -4   1    0.50    0.06
  24  -4  -1    0.53    0.09
 -24  -4   1    0.53    0.06
 -24   4   1    0.54    0.06
 -24   4   1    0.42    0.07
  24   4  -1    0.50    0.09
 -24   4   1    0.70    0.19
 -22  -4   1    0.28    0.18
 -22  -4   1    0.28    0.04
 -22  -4   1    0.20    0.05
  22  -4  -1    0.25    0.08
  22  -4  -1    0.31    0.15
  22   4  -1    0.16    0.08
 -22   4   1    0.28    0.04
 -22   4   1    0.24    0.04
  22   4  -1    0.15    0.15
 -22   4   1    0.21    0.16
 -20  -4   1   -0.05    0.04
  20  -4  -1   -0.06    0.06
  20  -4  -1    0.00    0.13
 -20  -4   1   -0.16    0.14
 -20  -4   1   -0.04    0.03
 -20   4   1   -0.08    0.13
  20   4  -1   -0.08    0.12
  20   4  -1   -0.18    0.07
 -20   4   1   -0.05    0.03
 -20   4   1   -0.01    0.03
 -18  -4   1    5.51    0.30
  18  -4  -1    5.77    0.41
 -18  -4   1    5.35    0.43
  18  -4  -1    5.22    0.33
 -18  -4   1    6.53    0.32
  18   4  -1    5.77    0.42
  18   4  -1    5.40    0.33
 -18   4   1    5.34    0.30
 -18   4   1    5.67    0.30
 -18   4   1    5.17    0.42
  16  -4  -1    9.55    0.51
  16  -4  -1    9.42    0.58
 -16  -4   1    8.70    0.49
 -16  -4   1    8.96    0.58
 -16   4   1    9.42    0.49
  16   4  -1    9.26    0.51
  16   4  -1    9.02    0.58
 -14  -4   1    3.39    0.31
 -14  -4   1    3.57    0.20
  14  -4  -1    3.86    0.30
 -14   4   1    3.67    0.20
 -14   4   1    3.41    0.19
  14   4  -1    3.67    0.20
 -14   4   1    3.46    0.30
  14   4  -1    3.84    0.30
  14   4  -1    3.62    0.22
 -12  -4   1   18.59    1.04
  12  -4  -1   18.96    1.10
 -12  -4   1   19.90    1.13
  12  -4  -1   20.35    1.05
  12   4  -1   20.22    1.06
 -12   4   1   20.78    1.11
  12   4  -1   21.12    1.12
  10  -4  -1   35.25    2.00
  10  -4  -1   38.95    1.96
 -10  -4   1   38.26    2.02
 -10   4   1   36.58    2.00
  10   4  -1   39.79    2.02
  10   4  -1   36.28    1.96
   8  -4  -1   19.73    0.99
   8  -4  -1   17.19    1.02
  -8  -4   1   18.35    0.99
  -8  -4   1   19.63    1.05
   8   4  -1   18.39    0.99
   8   4  -1   19.17    1.04
  -8   4   1   19.92    1.03
   6  -4  -1    8.80    0.52
  -6  -4   1    9.76    0.49
  -6  -4   1   10.34    0.54
   6  -4  -1    9.63    0.49
  -6   4   1    9.46    0.49
   6   4  -1    8.88    0.50
   6   4  -1    9.53    0.49
  -6   4   1    9.86    0.52
  -6   4   1    9.04    0.49
   6   4  -1    8.05    0.53
   4  -4  -1    8.11    0.41
   4  -4  -1    7.26    0.40
  -4  -4   1    7.68    0.44
  -4  -4   1    8.29    0.40
   4   4  -1    6.90    0.42
  -4   4   1    7.57    0.40
  -4   4   1    6.94    0.41
  -4   4   1    7.09    0.39
   4   4  -1    7.43    0.39
   4   4  -1    8.06    0.40
   2  -4  -1    1.83    0.10
   2  -4  -1    1.72    0.10
  -2  -4   1    1.89    0.12
  -2   4   1    1.60    0.11
  -2   4   1    1.92    0.10
   2   4  -1    1.95    0.12
   2   4  -1    1.88    0.10
   2   4  -1    2.03    0.10
   0  -4   1    3.88    0.22
   0  -4  -1    3.81    0.21
   0  -4  -1    3.45    0.20
   0  -4   1    3.88    0.21
   0   4  -1    3.51    0.20
   0   4   1    4.16    0.20
   0   4   1    3.83    0.20
   0   4  -1    3.86    0.20
   0   4  -1    3.68    0.20
  -2  -4  -1   14.80    0.82
  -2  -4  -1   15.44    0.81
   2  -4   1   15.44    0.81
   2   4   1   16.50    0.82
   2   4   1   15.88    0.80
  -2   4  -1   14.35    0.81
  -4  -4  -1    1.70    0.15
   4  -4   1    1.47    0.12
  -4  -4  -1    1.63    0.10
   4   4   1    1.64    0.09
  -4   4  -1    1.72    0.09
   4   4   1    1.63    0.10
   4   4   1    1.63    0.15
  -6  -4  -1  100.09    4.79
   6  -4   1   80.64    4.77
   6   4   1   93.22    4.78
  -8  -4  -1   39.05    2.11
   8  -4   1   38.74    2.10
   8   4   1   38.50    2.11
   8   4   1   37.94    2.07
  -8   4  -1   43.72    2.10
 -10  -4  -1    0.87    0.07
 -10  -4  -1    1.29    0.16
  10  -4   1    0.91    0.09
  10  -4   1    1.22    0.18
 -10   4  -1    0.98    0.07
  10   4   1    0.95    0.16
  10   4   1    1.04    0.10
 -10   4  -1    0.83    0.13
 -10   4  -1    1.18    0.06
  10   4   1    1.04    0.06
 -12  -4  -1   63.62    3.33
  12  -4   1   66.36    3.32
  12  -4   1   60.03    3.26
  12   4   1   64.15    3.33
 -12   4  -1   58.72    3.31
 -14  -4  -1    4.58    0.38
  14  -4   1    5.14    0.29
 -14  -4  -1    4.88    0.27
  14  -4   1    4.67    0.36
  14   4   1    4.93    0.26
 -14   4  -1    5.02    0.36
 -14   4  -1    5.12    0.27
  14   4   1    4.90    0.29
  14   4   1    5.08    0.38
 -14   4  -1    4.74    0.26
  16  -4   1    0.18    0.13
  16  -4   1    0.19    0.06
 -16  -4  -1    0.30    0.14
 -16  -4  -1    0.18    0.04
 -16  -4  -1    0.20    0.04
 -16   4  -1    0.26    0.12
  16   4   1    0.22    0.07
  16   4   1    0.21    0.13
 -16   4  -1    0.23    0.03
 -16   4  -1    0.19    0.04
  18  -4   1    3.33    0.30
 -18  -4  -1    3.06    0.32
  18  -4   1    3.35    0.21
 -18  -4  -1    2.77    0.17
 -18  -4  -1    3.00    0.18
 -18   4  -1    3.20    0.17
 -18   4  -1    2.75    0.29
  18   4   1    3.08    0.21
 -18   4  -1    2.92    0.17
  18   4   1    3.13    0.31
  20  -4   1    2.20    0.27
  20  -4   1    2.04    0.17
 -20  -4  -1    1.99    0.30
 -20  -4  -1    2.27    0.13
 -20  -4  -1    2.08    0.13
 -20   4  -1    2.04    0.28
 -20   4  -1    2.05    0.13
  20   4   1    2.55    0.29
  20   4   1    2.01    0.18
 -20   4  -1    2.14    0.12
 -22  -4  -1    1.79    0.26
  22  -4   1    1.64    0.24
 -22  -4  -1    2.07    0.12
  22  -4   1    2.01    0.17
 -22  -4  -1    1.92    0.12
  22   4   1    1.89    0.17
 -22   4  -1    1.73    0.27
 -22   4  -1    1.84    0.12
 -22   4  -1    2.07    0.12
  22   4   1    1.88    0.28
 -24  -4  -1    2.79    0.17
  24  -4   1    2.91    0.21
 -24  -4  -1    2.80    0.17
 -24   4  -1    3.07    0.33
 -24   4  -1    2.96    0.17
 -24   4  -1    2.89    0.16
  24   4   1    2.67    0.21
 -26  -4  -1    0.40    0.06
  26  -4   1    0.41    0.10
 -26   4  -1    0.54    0.06
  26   4   1    0.23    0.09
  28  -4   1    0.20    0.09
 -28  -4  -1    0.32    0.06
  28   4   1    0.19    0.09
 -28   4  -1    0.28    0.06
  30  -4   1    5.06    0.31
 -30  -4  -1    4.54    0.27
 -30   4  -1    4.69    0.27
  30   4   1    4.81    0.31
  32  -4   1    0.57    0.11
 -32  -4  -1    0.55    0.08
 -32   4  -1    0.65    0.08
  32   4   1    0.74    0.11
 -34  -4  -1   -0.05    0.06
  34  -4   1   -0.12    0.08
 -34   4  -1   -0.01    0.05
  34   4   1    0.02    0.09
 -36  -4  -1    0.40    0.07
  36  -4   1    0.35    0.11
  36   4   1    0.32    0.10
 -36   4  -1    0.40    0.07
  38  -4   1    1.41    0.17
  38   4   1    1.21    0.17
 -38   4  -1    1.34    0.12
  40  -4   1    0.69    0.12
  40   4   1    0.68    0.12
  41  -5  -1   -0.19    0.09
  41   5  -1   -0.09    0.08
  39  -5  -1    0.11    0.10
  39   5  -1    0.29    0.10
  37  -5  -1    0.45    0.11
  37   5  -1    0.49    0.11
 -37   5   1    0.47    0.08
  35  -5  -1   -0.07    0.09
  35   5  -1    0.01    0.09
 -35   5   1    0.04    0.06
 -33  -5   1    0.00    0.05
  33  -5  -1    0.08    0.09
  33   5  -1    0.01    0.09
 -33   5   1    0.01    0.05
  31  -5  -1    0.06    0.09
 -31  -5   1    0.00    0.05
  31   5  -1    0.04    0.08
 -31   5   1   -0.03    0.05
  29  -5  -1    0.81    0.11
 -29  -5   1    0.81    0.09
  29   5  -1    0.81    0.11
 -29   5   1    0.88    0.09
 -29   5   1    0.91    0.09
  27  -5  -1    2.19    0.19
 -27  -5   1    2.35    0.15
 -27   5   1    2.46    0.15
  27   5  -1    2.32    0.20
 -27   5   1    2.58    0.15
 -25  -5   1   -0.04    0.04
 -25  -5   1    0.04    0.04
 -25   5   1   -0.04    0.04
 -25   5   1    0.02    0.03
  25   5  -1   -0.04    0.07
 -23  -5   1    0.84    0.08
  23  -5  -1    0.69    0.10
 -23  -5   1    0.86    0.09
  23  -5  -1    1.07    0.20
 -23  -5   1    0.80    0.18
 -23   5   1    0.92    0.21
 -23   5   1    0.83    0.08
 -23   5   1    0.82    0.07
  23   5  -1    0.71    0.10
 -21  -5   1    0.84    0.08
  21  -5  -1    0.82    0.10
 -21  -5   1    0.90    0.19
  21  -5  -1    0.85    0.18
 -21  -5   1    0.79    0.08
 -21   5   1    0.86    0.08
  21   5  -1    0.76    0.19
 -21   5   1    0.88    0.07
  21   5  -1    0.82    0.10
 -21   5   1    1.10    0.20
 -19  -5   1    0.26    0.13
 -19  -5   1    0.49    0.06
 -19  -5   1    0.43    0.06
  19  -5  -1    0.37    0.07
  19  -5  -1    0.53    0.15
  19   5  -1    0.38    0.08
 -19   5   1    0.56    0.06
  19   5  -1    0.43    0.15
 -19   5   1    0.50    0.05
 -19   5   1    0.43    0.16
 -17  -5   1   19.24    1.09
 -17  -5   1   20.99    1.19
  17  -5  -1   23.48    1.19
  17  -5  -1   21.99    1.11
 -17   5   1   20.83    1.09
  17   5  -1   21.97    1.19
 -17   5   1   20.84    1.19
  17   5  -1   21.48    1.09
  17   5  -1   20.04    1.11
 -17   5   1   18.68    1.09
  15  -5  -1    5.34    0.37
 -15  -5   1    5.25    0.28
 -15  -5   1    5.01    0.39
  15  -5  -1    5.16    0.30
 -15   5   1    5.60    0.28
  15   5  -1    5.38    0.39
 -15   5   1    4.07    0.37
 -15   5   1    5.19    0.28
  15   5  -1    5.36    0.31
  15   5  -1    5.35    0.28
  13  -5  -1    0.50    0.07
  13  -5  -1    0.52    0.12
 -13  -5   1    0.60    0.15
 -13  -5   1    0.56    0.06
  13   5  -1    0.63    0.07
  13   5  -1    0.83    0.15
 -13   5   1    0.65    0.05
 -13   5   1    0.57    0.13
 -13   5   1    0.60    0.05
  13   5  -1    0.70    0.05
 -11  -5   1   40.47    2.28
  11  -5  -1   40.88    2.21
  11  -5  -1   46.59    2.26
 -11   5   1   38.04    2.25
  11   5  -1   42.57    2.21
  11   5  -1   44.99    2.27
   9  -5  -1    2.02    0.13
  -9  -5   1    1.94    0.12
  -9  -5   1    1.70    0.21
   9  -5  -1    1.56    0.17
  -9   5   1    1.90    0.19
  -9   5   1    2.08    0.11
  -9   5   1    2.09    0.11
   9   5  -1    1.87    0.19
   9   5  -1    1.99    0.11
  -7  -5   1  105.83    5.49
   7   5  -1  103.86    5.49
   5  -5  -1   49.57    2.55
  -5  -5   1   48.46    2.57
  -5   5   1   49.90    2.55
   5   5  -1   46.89    2.56
   3  -5  -1    0.61    0.04
  -3  -5   1    0.58    0.07
   3  -5  -1    0.57    0.03
  -3  -5   1    0.43    0.08
   3  -5  -1    0.64    0.08
  -3   5   1    0.65    0.04
   3   5  -1    0.68    0.04
  -3   5   1    0.46    0.06
   3   5  -1    0.46    0.05
   3   5  -1    0.51    0.07
   1  -5  -1   83.36    5.68
  -1  -5   1   81.86    5.18
   1  -5  -1   82.83    5.42
  -1  -5   1   88.32    5.44
   1   5  -1   71.60    5.12
   1   5  -1   95.17    5.53
  -1   5   1   85.45    5.73
   1  -5   1    9.10    0.49
  -1  -5  -1    8.80    0.49
   1  -5   1    9.97    0.49
  -1  -5  -1    9.72    0.50
   1   5   1    8.53    0.48
   1   5   1    9.46    0.50
   1   5   1    9.26    0.48
  -1   5  -1    9.16    0.48
  -3  -5  -1   41.15    2.00
   3  -5   1   37.94    2.00
   3   5   1   35.77    2.01
   5   5   1  137.01    7.15
   7  -5   1    6.87    0.41
  -7  -5  -1    7.76    0.44
   7  -5   1    7.00    0.38
   7   5   1    7.20    0.37
   7   5   1    6.54    0.43
  -7   5  -1    6.64    0.41
  -7   5  -1    7.01    0.37
   7   5   1    7.63    0.39
  -7   5  -1    6.77    0.37
   9  -5   1   26.81    1.28
  -9  -5  -1   22.01    1.23
   9  -5   1   24.00    1.24
  -9  -5  -1   24.27    1.29
  -9   5  -1   22.64    1.27
   9   5   1   23.10    1.29
  -9   5  -1   22.14    1.23
  11  -5   1    7.16    0.47
 -11  -5  -1    7.75    0.41
 -11   5  -1    7.68    0.41
  11   5   1    7.37    0.49
  11   5   1    7.84    0.40
 -11   5  -1    7.00    0.46
  11   5   1    7.86    0.42
 -11   5  -1    7.63    0.40
 -13  -5  -1   11.57    0.74
  13  -5   1   13.57    0.67
 -13  -5  -1   11.92    0.65
  13  -5   1   13.73    0.74
 -13   5  -1   11.24    0.65
 -13   5  -1   12.59    0.65
  13   5   1   12.09    0.67
  15  -5   1    8.47    0.46
 -15  -5  -1    8.33    0.55
 -15  -5  -1    8.21    0.44
 -15   5  -1    8.21    0.44
  15   5   1    8.37    0.46
  15   5   1    8.11    0.44
 -15   5  -1    8.88    0.53
 -15   5  -1    7.83    0.44
  15   5   1    8.48    0.54
 -17  -5  -1    2.92    0.17
  17  -5   1    2.77    0.20
 -17  -5  -1    2.88    0.30
  17  -5   1    3.29    0.29
  17   5   1    2.94    0.20
  17   5   1    2.94    0.16
 -17   5  -1    2.99    0.17
 -17   5  -1    2.79    0.28
  17   5   1    2.99    0.30
 -17   5  -1    3.00    0.16
 -19  -5  -1    0.69    0.19
  19  -5   1    0.76    0.17
  19  -5   1    0.64    0.09
 -19  -5  -1    0.58    0.07
 -19  -5  -1    0.94    0.07
  19   5   1    0.70    0.10
  19   5   1    0.63    0.17
 -19   5  -1    0.81    0.06
 -19   5  -1    0.88    0.18
 -19   5  -1    0.65    0.07
  21  -5   1    0.90    0.19
 -21  -5  -1    1.13    0.22
  21  -5   1    0.84    0.11
 -21  -5  -1    1.07    0.09
  21   5   1    0.89    0.11
 -21   5  -1    1.33    0.08
 -21   5  -1    0.91    0.19
  21   5   1    1.28    0.22
 -21   5  -1    1.10    0.09
 -23  -5  -1    0.14    0.15
  23  -5   1    0.23    0.16
 -23  -5  -1   -0.06    0.04
 -23  -5  -1    0.01    0.04
  23  -5   1   -0.02    0.07
 -23   5  -1    0.03    0.03
 -23   5  -1    0.02    0.04
  23   5   1   -0.05    0.07
 -23   5  -1    0.04    0.14
 -25  -5  -1    1.00    0.09
  25  -5   1    0.93    0.12
 -25   5  -1    1.13    0.09
 -25   5  -1    1.13    0.08
  25   5   1    0.78    0.12
  27  -5   1    0.20    0.09
 -27  -5  -1    0.24    0.05
 -27   5  -1    0.20    0.05
  27   5   1   -0.02    0.09
  29  -5   1    7.91    0.45
 -29  -5  -1    7.46    0.42
 -29   5  -1    7.55    0.42
  29   5   1    7.69    0.45
 -31  -5  -1    1.41    0.11
  31  -5   1    1.46    0.17
 -31   5  -1    1.43    0.11
  31   5   1    1.71    0.17
 -33  -5  -1    2.00    0.14
  33  -5   1    2.01    0.19
  33   5   1    1.71    0.19
 -33   5  -1    2.16    0.14
  35  -5   1    0.01    0.09
 -35  -5  -1   -0.03    0.06
  35   5   1    0.09    0.09
 -35   5  -1   -0.03    0.05
  37  -5   1    1.08    0.16
 -37  -5  -1    1.19    0.12
 -37   5  -1    1.18    0.11
  37   5   1    1.27    0.17
  39  -5   1   -0.08    0.09
  39   5   1    0.00    0.09
 -39   5  -1    0.00    0.06
  41  -5   1   -0.14    0.10
  41   5   1   -0.10    0.09
  40  -6  -1   -0.23    0.09
  40   6  -1   -0.05    0.09
  38  -6  -1    0.32    0.11
  38   6  -1    0.41    0.10
  36  -6  -1    0.08    0.10
 -36   6   1    0.08    0.06
  36   6  -1    0.13    0.09
 -34  -6   1   -0.02    0.05
  34  -6  -1   -0.10    0.09
 -34   6   1    0.03    0.06
  34   6  -1   -0.06    0.09
  32  -6  -1    0.07    0.09
 -32  -6   1    0.03    0.05
  32   6  -1    0.05    0.08
 -32   6   1    0.07    0.06
 -30  -6   1    0.36    0.06
  30  -6  -1    0.23    0.09
 -30   6   1    0.29    0.06
  30   6  -1    0.32    0.09
  28  -6  -1    1.51    0.16
 -28  -6   1    1.24    0.10
 -28   6   1    1.28    0.11
  28   6  -1    1.59    0.17
 -28   6   1    1.41    0.10
 -26  -6   1    0.72    0.08
 -26  -6   1    0.71    0.09
  26  -6  -1    0.58    0.10
 -26   6   1    0.79    0.08
  26   6  -1    0.43    0.10
 -26   6   1    0.76    0.08
  24  -6  -1    4.76    0.30
 -24  -6   1    5.35    0.28
  24  -6  -1    4.78    0.42
 -24  -6   1    4.99    0.27
 -24   6   1    4.07    0.42
 -24   6   1    4.64    0.27
 -24   6   1    4.65    0.26
  24   6  -1    4.52    0.30
 -22  -6   1    2.46    0.33
 -22  -6   1    2.33    0.16
  22  -6  -1    2.57    0.19
 -22  -6   1    2.49    0.15
  22  -6  -1    2.54    0.29
 -22   6   1    2.38    0.15
  22   6  -1    2.31    0.30
  22   6  -1    2.41    0.19
 -22   6   1    2.54    0.31
 -22   6   1    2.58    0.15
  20  -6  -1    0.48    0.15
 -20  -6   1    0.43    0.06
 -20  -6   1    0.26    0.05
 -20  -6   1    0.23    0.16
  20  -6  -1    0.32    0.07
  20   6  -1    0.26    0.08
 -20   6   1    0.41    0.17
  20   6  -1    0.20    0.14
 -18  -6   1   19.95    1.28
 -18  -6   1   22.86    1.18
  18  -6  -1   24.28    1.20
  18   6  -1   24.43    1.20
 -18   6   1   21.28    1.17
 -18   6   1   19.22    1.27
  18   6  -1   23.03    1.28
  18   6  -1   22.55    1.18
 -18   6   1   24.02    1.18
 -16  -6   1    2.01    0.12
  16  -6  -1    2.09    0.23
 -16  -6   1    1.71    0.22
  16  -6  -1    2.12    0.15
  16   6  -1    1.98    0.15
  16   6  -1    2.12    0.12
 -16   6   1    1.81    0.12
  16   6  -1    1.80    0.24
 -16   6   1    2.07    0.12
 -16   6   1    1.80    0.25
  14  -6  -1    5.32    0.36
 -14  -6   1    5.04    0.28
  14  -6  -1    5.07    0.29
 -14  -6   1    4.85    0.38
  14   6  -1    4.70    0.30
 -14   6   1    5.24    0.27
 -14   6   1    4.36    0.36
  14   6  -1    5.20    0.28
  14   6  -1    5.55    0.37
 -14   6   1    5.40    0.28
 -12  -6   1    0.62    0.15
  12  -6  -1    0.65    0.12
 -12  -6   1    0.66    0.07
  12  -6  -1    0.78    0.08
 -12   6   1    0.70    0.13
  12   6  -1    0.89    0.15
 -12   6   1    0.69    0.06
  12   6  -1    0.78    0.05
 -12   6   1    0.74    0.06
  12   6  -1    0.58    0.07
  10  -6  -1    2.16    0.12
 -10  -6   1    1.77    0.12
 -10  -6   1    1.71    0.21
  10  -6  -1    1.83    0.17
 -10   6   1    1.63    0.10
 -10   6   1    1.61    0.18
  10   6  -1    1.84    0.10
  10   6  -1    1.71    0.13
  10   6  -1    1.68    0.19
   8  -6  -1   10.67    0.53
  -8  -6   1   10.46    0.54
  -8  -6   1    9.92    0.59
   8  -6  -1    9.30    0.56
   8   6  -1    9.64    0.54
   8   6  -1   10.24    0.53
  -8   6   1    9.14    0.56
  -8   6   1    9.87    0.53
  -8   6   1    9.71    0.53
   8   6  -1   11.14    0.58
  -6  -6   1    0.10    0.09
   6  -6  -1    0.15    0.02
   6  -6  -1    0.13    0.05
   6   6  -1    0.13    0.02
  -6   6   1    0.10    0.02
  -6   6   1    0.12    0.03
   6   6  -1    0.10    0.07
  -6   6   1    0.12    0.06
   6   6  -1    0.13    0.03
   4  -6  -1    0.84    0.06
   4  -6  -1    0.82    0.05
  -4  -6   1    0.91    0.09
  -4  -6   1    0.78    0.12
  -4   6   1    0.92    0.05
   4   6  -1    0.97    0.10
   4   6  -1    0.93    0.06
  -2  -6   1   12.40    0.61
  -2  -6   1   11.61    0.62
   2   6  -1   11.46    0.59
   2   6  -1   10.30    0.59
   2   6  -1   11.11    0.60
   0  -6  -1   46.78    2.48
   0  -6   1   47.87    2.48
   2  -6   1    2.73    0.13
  -2  -6  -1    2.78    0.17
   2  -6   1    2.21    0.14
  -2  -6  -1    2.52    0.17
   2  -6   1    2.75    0.14
   2   6   1    2.72    0.14
   2   6   1    2.31    0.16
  -2   6  -1    2.14    0.14
   2   6   1    2.78    0.14
  -4  -6  -1    0.06    0.06
   4  -6   1    0.13    0.04
  -4  -6  -1    0.02    0.03
   4   6   1    0.02    0.03
  -4   6  -1    0.06    0.02
   4   6   1    0.03    0.01
  -4   6  -1    0.00    0.03
   4   6   1   -0.01    0.06
  -6  -6  -1    0.45    0.06
   6  -6   1    0.60    0.06
  -6  -6  -1    0.49    0.11
   6  -6   1    0.67    0.10
  -6   6  -1    0.60    0.05
   6   6   1    0.63    0.04
   6   6   1    0.50    0.10
   6   6   1    0.62    0.07
  -6   6  -1    0.60    0.05
  -6   6  -1    0.73    0.10
   8  -6   1    2.30    0.20
  -8  -6  -1    1.99    0.14
  -8  -6  -1    2.05    0.21
   8  -6   1    2.65    0.14
  -8   6  -1    2.36    0.13
  -8   6  -1    2.24    0.18
  -8   6  -1    2.13    0.13
   8   6   1    2.34    0.15
   8   6   1    2.45    0.21
 -10  -6  -1    0.54    0.08
  10  -6   1    0.67    0.12
 -10  -6  -1    0.67    0.14
  10  -6   1    0.60    0.08
  10   6   1    0.60    0.07
  10   6   1    0.68    0.05
 -10   6  -1    0.63    0.11
 -10   6  -1    0.68    0.05
  10   6   1    0.63    0.13
  12  -6   1    4.42    0.35
 -12  -6  -1    4.63    0.36
 -12  -6  -1    5.17    0.27
  12  -6   1    4.67    0.28
 -12   6  -1    5.06    0.27
  12   6   1    5.27    0.37
  12   6   1    4.75    0.26
 -12   6  -1    5.79    0.35
  12   6   1    4.68    0.29
 -12   6  -1    4.96    0.26
 -14  -6  -1    0.80    0.17
 -14  -6  -1    1.03    0.09
  14  -6   1    0.85    0.16
 -14   6  -1    1.19    0.07
  14   6   1    1.10    0.17
 -14   6  -1    1.06    0.07
  14   6   1    1.12    0.07
  14   6   1    1.04    0.12
 -14   6  -1    0.86    0.15
  16  -6   1    2.77    0.29
  16  -6   1    2.55    0.22
 -16  -6  -1    2.94    0.17
 -16  -6  -1    2.58    0.30
  16   6   1    2.37    0.28
 -16   6  -1    3.06    0.17
  16   6   1    2.89    0.16
 -16   6  -1    3.00    0.16
  16   6   1    2.65    0.20
 -18  -6  -1    0.71    0.19
  18  -6   1    1.06    0.19
  18  -6   1    1.05    0.12
 -18  -6  -1    1.14    0.09
  18   6   1    0.99    0.17
 -18   6  -1    0.84    0.18
 -18   6  -1    1.09    0.07
  18   6   1    0.97    0.07
  18   6   1    1.01    0.13
 -18   6  -1    1.06    0.07
 -20  -6  -1    0.06    0.16
  20  -6   1    0.19    0.07
 -20  -6  -1    0.34    0.05
  20  -6   1    0.17    0.15
 -20  -6  -1    0.24    0.05
 -20   6  -1    0.28    0.05
  20   6   1    0.21    0.08
  20   6   1    0.26    0.15
 -20   6  -1    0.37    0.15
 -20   6  -1    0.29    0.04
  22  -6   1    2.79    0.21
 -22  -6  -1    3.18    0.17
 -22  -6  -1    2.48    0.29
 -22  -6  -1    2.63    0.17
  22  -6   1    2.36    0.31
  22   6   1    2.89    0.33
 -22   6  -1    2.60    0.32
 -22   6  -1    2.93    0.16
 -22   6  -1    2.84    0.17
  22   6   1    2.64    0.21
 -24  -6  -1    0.28    0.05
 -24  -6  -1    0.21    0.05
  24  -6   1    0.06    0.08
  24  -6   1    0.29    0.17
 -24   6  -1    0.21    0.05
  24   6   1    0.16    0.09
 -24   6  -1    0.20    0.16
 -24   6  -1    0.22    0.04
  26  -6   1    2.55    0.21
 -26  -6  -1    2.66    0.17
 -26   6  -1    2.98    0.16
  26   6   1    2.57    0.22
 -26   6  -1    2.81    0.17
  28  -6   1    3.43    0.24
 -28  -6  -1    3.20    0.19
  28   6   1    2.99    0.24
 -28   6  -1    2.98    0.19
 -30  -6  -1    4.97    0.29
  30  -6   1    4.95    0.32
  30   6   1    5.04    0.32
 -30   6  -1    5.04    0.28
  32  -6   1    0.84    0.12
 -32  -6  -1    1.14    0.10
  32   6   1    1.23    0.16
 -32   6  -1    1.26    0.10
  34  -6   1    0.76    0.12
 -34  -6  -1    0.76    0.09
 -34   6  -1    0.90    0.09
  34   6   1    0.69    0.11
 -36  -6  -1    0.02    0.06
  36  -6   1    0.10    0.10
  36   6   1    0.16    0.15
 -36   6  -1    0.02    0.06
  38  -6   1    0.46    0.11
  38   6   1    0.46    0.11
  40  -6   1   -0.20    0.09
  40   6   1    0.01    0.09
  39  -7  -1   -0.21    0.09
  39   7  -1    0.05    0.09
 -37   7   1    0.08    0.07
  37   7  -1    0.22    0.09
  35  -7  -1    0.04    0.09
  35   7  -1    0.11    0.09
 -35   7   1    0.06    0.06
 -33  -7   1    0.24    0.06
  33  -7  -1    0.14    0.09
  33   7  -1    0.15    0.09
 -33   7   1    0.28    0.06
 -31  -7   1    0.23    0.06
  31  -7  -1    0.22    0.09
 -31   7   1    0.23    0.06
  31   7  -1    0.25    0.09
  29  -7  -1    0.39    0.10
 -29  -7   1    0.33    0.06
 -29   7   1    0.30    0.05
  29   7  -1    0.29    0.09
 -29   7   1    0.35    0.06
 -27  -7   1    0.15    0.05
  27  -7  -1    0.15    0.08
  27   7  -1    0.21    0.08
 -27   7   1    0.13    0.04
 -27   7   1    0.10    0.05
 -25  -7   1    0.18    0.05
 -25  -7   1    0.18    0.06
 -25   7   1    0.21    0.04
  25   7  -1    0.16    0.08
 -25   7   1    0.19    0.05
 -23  -7   1    0.30    0.06
 -23  -7   1    0.22    0.05
  23  -7  -1    0.18    0.07
  23  -7  -1    0.10    0.15
 -23   7   1    0.22    0.04
  23   7  -1    0.20    0.08
 -23   7   1    0.22    0.05
 -23   7   1    0.32    0.18
  21  -7  -1    3.74    0.35
 -21  -7   1    3.30    0.37
 -21  -7   1    3.52    0.21
  21  -7  -1    3.70    0.24
 -21   7   1    3.93    0.21
  21   7  -1    3.74    0.24
 -21   7   1    3.86    0.21
 -21   7   1    3.31    0.35
  21   7  -1    3.43    0.34
 -19  -7   1    6.56    0.55
 -19  -7   1    8.15    0.43
  19  -7  -1    9.30    0.45
  19  -7  -1    8.04    0.54
 -19   7   1    7.56    0.55
  19   7  -1    7.42    0.54
 -19   7   1    8.35    0.43
  19   7  -1    8.40    0.43
  19   7  -1    7.50    0.46
 -19   7   1    8.23    0.43
 -17  -7   1    6.73    0.49
  17  -7  -1    6.82    0.46
 -17  -7   1    6.58    0.36
  17  -7  -1    6.78    0.38
 -17   7   1    6.11    0.35
 -17   7   1    6.64    0.36
  17   7  -1    6.70    0.36
 -17   7   1    7.59    0.48
  17   7  -1    6.44    0.47
  17   7  -1    6.57    0.39
  15  -7  -1    1.01    0.16
 -15  -7   1    1.03    0.18
 -15  -7   1    1.04    0.09
  15  -7  -1    1.08    0.10
  15   7  -1    1.23    0.07
 -15   7   1    1.00    0.07
 -15   7   1    1.08    0.08
  15   7  -1    1.18    0.17
 -15   7   1    1.04    0.17
  15   7  -1    1.00    0.12
 -13  -7   1   11.37    0.70
  13  -7  -1   12.16    0.62
 -13  -7   1   11.44    0.62
  13  -7  -1   11.67    0.68
  13   7  -1   12.22    0.63
 -13   7   1   11.79    0.61
  13   7  -1   11.48    0.61
 -13   7   1   11.27    0.61
  13   7  -1   10.65    0.69
 -11  -7   1    0.41    0.06
  11  -7  -1    0.41    0.09
 -11  -7   1    0.48    0.13
  11  -7  -1    0.56    0.06
  11   7  -1    0.45    0.12
 -11   7   1    0.27    0.10
 -11   7   1    0.50    0.04
  11   7  -1    0.39    0.04
 -11   7   1    0.41    0.04
  11   7  -1    0.38    0.06
   9  -7  -1    0.26    0.03
   9  -7  -1    0.27    0.07
  -9  -7   1    0.17    0.10
   9   7  -1    0.19    0.03
  -9   7   1    0.30    0.03
   9   7  -1    0.16    0.09
   9   7  -1    0.20    0.04
  -9   7   1    0.12    0.08
  -7  -7   1    5.32    0.35
   7  -7  -1    4.83    0.30
   7  -7  -1    5.17    0.28
  -7  -7   1    5.25    0.29
   7   7  -1    5.12    0.28
   7   7  -1    4.88    0.29
  -7   7   1    5.84    0.31
  -7   7   1    5.57    0.28
   7   7  -1    5.25    0.33
   5  -7  -1    0.15    0.02
   5  -7  -1    0.15    0.03
  -5  -7   1    0.17    0.08
  -5  -7   1    0.20    0.04
   5   7  -1    0.09    0.06
   5   7  -1    0.14    0.03
  -5   7   1    0.07    0.03
   5   7  -1    0.17    0.03
  -5   7   1    0.10    0.04
  -3  -7   1   65.91    3.48
   3   7  -1   67.10    3.47
   1  -7  -1    9.05    0.46
  -1  -7   1    8.32    0.45
  -1  -7   1    8.05    0.45
  -1   7   1    7.77    0.43
   1   7  -1    8.22    0.43
   1   7  -1    8.20    0.43
   1   7  -1    7.94    0.43
  -1  -7  -1   39.21    2.15
   1  -7   1   44.04    2.16
   1   7   1   39.75    2.14
  -3  -7  -1   10.81    0.63
   3  -7   1   11.96    0.61
  -3  -7  -1   12.08    0.63
  -3   7  -1   11.26    0.61
   3   7   1   11.77    0.61
   3   7   1   10.90    0.61
   3   7   1   12.86    0.64
  -5  -7  -1    8.86    0.47
   5  -7   1    9.26    0.45
  -5  -7  -1    7.67    0.49
   5  -7   1    7.89    0.47
   5   7   1    9.81    0.50
   5   7   1    8.09    0.46
  -5   7  -1    8.83    0.46
   5   7   1    8.18    0.45
  -5   7  -1    8.53    0.45
  -5   7  -1    8.65    0.45
   7  -7   1   18.23    1.14
   7  -7   1   23.96    1.12
  -7  -7  -1   22.91    1.17
  -7  -7  -1   21.05    1.13
   7   7   1   22.49    1.12
  -7   7  -1   22.67    1.14
  -7   7  -1   19.48    1.11
   7   7   1   20.52    1.16
   7   7   1   20.61    1.11
   9  -7   1   33.76    1.93
  -9  -7  -1   37.23    1.94
   9  -7   1   40.16    1.98
   9   7   1   40.03    2.00
  -9   7  -1   33.26    1.96
   9   7   1   38.13    1.94
  11  -7   1    8.88    0.48
 -11  -7  -1    8.01    0.50
  11  -7   1    7.76    0.42
 -11  -7  -1    7.95    0.42
  11   7   1    7.85    0.43
 -11   7  -1    7.67    0.41
  11   7   1    7.55    0.41
 -11   7  -1    6.47    0.47
 -11   7  -1    7.48    0.41
  11   7   1    8.01    0.49
  13  -7   1   20.38    1.17
 -13  -7  -1   20.64    1.24
  13  -7   1   25.58    1.24
 -13  -7  -1   22.53    1.17
  13   7   1   22.24    1.24
  13   7   1   23.21    1.18
 -13   7  -1   22.55    1.16
  13   7   1   21.96    1.16
 -13   7  -1   20.31    1.22
 -13   7  -1   22.20    1.16
  15  -7   1    0.71    0.10
 -15  -7  -1    0.85    0.08
 -15  -7  -1    0.53    0.16
  15  -7   1    0.46    0.13
  15   7   1    0.50    0.08
 -15   7  -1    0.56    0.06
 -15   7  -1    0.72    0.06
 -15   7  -1    0.42    0.14
  15   7   1    0.65    0.15
  15   7   1    0.64    0.05
 -17  -7  -1    0.91    0.20
  17  -7   1    1.19    0.12
  17  -7   1    1.00    0.18
 -17  -7  -1    1.30    0.10
 -17   7  -1    1.49    0.09
 -17   7  -1    0.99    0.18
 -17   7  -1    1.18    0.08
  17   7   1    0.98    0.18
  17   7   1    1.19    0.08
  17   7   1    1.29    0.14
  19  -7   1    0.07    0.06
 -19  -7  -1    0.07    0.05
 -19  -7  -1   -0.04    0.13
  19  -7   1    0.23    0.15
  19   7   1   -0.02    0.07
 -19   7  -1    0.05    0.03
 -19   7  -1    0.17    0.14
  19   7   1    0.09    0.14
  19   7   1    0.00    0.03
 -19   7  -1    0.07    0.03
  21  -7   1    2.71    0.29
 -21  -7  -1    2.03    0.13
 -21  -7  -1    1.71    0.26
  21  -7   1    2.21    0.18
 -21   7  -1    1.99    0.13
  21   7   1    2.01    0.18
 -21   7  -1    1.86    0.28
  21   7   1    1.77    0.24
 -21   7  -1    2.02    0.12
 -23  -7  -1    0.22    0.05
  23  -7   1    0.01    0.08
  23  -7   1    0.04    0.15
 -23  -7  -1    0.04    0.04
 -23   7  -1    0.07    0.04
 -23   7  -1    0.10    0.03
 -23   7  -1    0.05    0.15
  23   7   1   -0.05    0.08
  25  -7   1    0.03    0.09
 -25   7  -1    0.13    0.04
  25   7   1   -0.02    0.08
 -25   7  -1    0.10    0.05
 -27  -7  -1    1.12    0.10
  27  -7   1    1.49    0.17
 -27   7  -1    1.04    0.10
 -27   7  -1    1.25    0.09
  27   7   1    1.29    0.16
  29  -7   1    4.36    0.30
 -29  -7  -1    4.16    0.25
 -29   7  -1    4.40    0.25
  29   7   1    4.27    0.29
 -31  -7  -1    0.31    0.06
  31  -7   1    0.32    0.10
  31   7   1    0.22    0.09
 -31   7  -1    0.31    0.06
  33  -7   1    2.22    0.22
 -33  -7  -1    2.18    0.15
 -33   7  -1    2.43    0.16
  33   7   1    2.28    0.20
 -35  -7  -1    0.07    0.06
  35  -7   1   -0.03    0.09
  35   7   1    0.04    0.09
 -35   7  -1    0.03    0.06
  37  -7   1   -0.03    0.11
  37   7   1    0.10    0.09
 -37   7  -1    0.06    0.07
  39  -7   1   -0.06    0.10
  39   7   1   -0.13    0.09
 -39   7  -1   -0.01    0.07
  38  -8  -1    0.13    0.11
  38   8  -1    0.42    0.10
  36  -8  -1    0.83    0.13
 -36   8   1    1.06    0.12
  36   8  -1    1.23    0.16
  34  -8  -1    0.19    0.10
  34   8  -1    0.17    0.10
 -34   8   1    0.17    0.07
 -32  -8   1    0.07    0.06
  32  -8  -1   -0.02    0.09
 -32   8   1    0.15    0.06
  32   8  -1   -0.06    0.09
 -30  -8   1    0.85    0.09
  30  -8  -1    0.72    0.11
  30   8  -1    0.55    0.11
 -30   8   1    0.83    0.10
  28  -8  -1    0.68    0.11
 -28  -8   1    0.73    0.08
 -28   8   1    0.71    0.08
 -28   8   1    0.60    0.08
  28   8  -1    0.62    0.10
 -26  -8   1    1.77    0.13
 -26  -8   1    1.88    0.15
  26  -8  -1    1.58    0.17
  26   8  -1    2.14    0.18
 -26   8   1    1.86    0.12
 -26   8   1    1.81    0.13
  24  -8  -1    2.21    0.19
 -24  -8   1    2.43    0.15
  24  -8  -1    2.03    0.32
 -24   8   1    2.26    0.34
  24   8  -1    2.35    0.19
 -24   8   1    2.50    0.15
 -24   8   1    2.39    0.15
 -22  -8   1    3.69    0.38
  22  -8  -1    3.59    0.24
 -22  -8   1    3.47    0.21
  22  -8  -1    4.00    0.35
 -22   8   1    3.65    0.21
  22   8  -1    3.64    0.24
 -22   8   1    3.76    0.21
 -22   8   1    3.73    0.37
  20  -8  -1   12.49    0.72
 -20  -8   1   12.06    0.62
  20  -8  -1   11.71    0.64
 -20  -8   1   10.68    0.75
  20   8  -1   12.27    0.62
 -20   8   1   10.85    0.73
 -20   8   1   11.56    0.62
 -20   8   1   11.18    0.62
  20   8  -1   11.17    0.64
  20   8  -1   12.82    0.74
 -18  -8   1    5.36    0.46
  18  -8  -1    5.73    0.42
  18  -8  -1    5.59    0.34
 -18  -8   1    6.22    0.33
 -18   8   1    6.14    0.32
 -18   8   1    5.98    0.33
  18   8  -1    6.30    0.35
  18   8  -1    6.02    0.44
 -18   8   1    5.67    0.43
  18   8  -1    6.28    0.32
 -16  -8   1   -0.01    0.13
  16  -8  -1    0.18    0.05
  16  -8  -1    0.26    0.13
 -16  -8   1    0.12    0.05
 -16   8   1    0.17    0.12
 -16   8   1    0.17    0.04
 -16   8   1    0.17    0.04
  16   8  -1    0.24    0.03
  16   8  -1    0.13    0.06
  16   8  -1    0.26    0.13
  14  -8  -1    4.55    0.35
  14  -8  -1    5.65    0.30
 -14  -8   1    5.47    0.29
 -14  -8   1    5.34    0.40
  14   8  -1    4.87    0.38
 -14   8   1    5.44    0.29
  14   8  -1    5.32    0.28
  14   8  -1    5.30    0.31
 -14   8   1    5.05    0.28
 -12  -8   1    2.15    0.15
  12  -8  -1    2.65    0.21
 -12  -8   1    2.22    0.25
  12   8  -1    2.17    0.15
 -12   8   1    2.42    0.13
  12   8  -1    2.28    0.13
  12   8  -1    2.30    0.24
 -12   8   1    2.80    0.22
 -12   8   1    2.56    0.14
 -10  -8   1   11.47    0.65
 -10  -8   1   12.11    0.72
  10  -8  -1   13.06    0.68
  10  -8  -1   12.48    0.65
 -10   8   1   12.07    0.64
  10   8  -1   12.22    0.64
  10   8  -1   12.34    0.65
 -10   8   1   12.72    0.69
  10   8  -1   12.00    0.70
 -10   8   1   11.65    0.64
  -8  -8   1    6.99    0.40
  -8  -8   1    7.73    0.46
   8  -8  -1    7.68    0.41
   8  -8  -1    7.33    0.38
  -8   8   1    6.79    0.38
  -8   8   1    6.93    0.38
   8   8  -1    7.06    0.39
   8   8  -1    6.67    0.38
   8   8  -1    6.93    0.43
  -8   8   1    8.09    0.42
  -6  -8   1    3.05    0.24
   6  -8  -1    2.98    0.16
  -6  -8   1    2.77    0.19
   6  -8  -1    2.90    0.17
   6   8  -1    3.11    0.17
  -6   8   1    3.33    0.18
  -6   8   1    3.18    0.17
   6   8  -1    2.94    0.21
   6   8  -1    3.14    0.17
  -4  -8   1   95.16    4.78
   4  -8  -1   87.47    4.77
  -2  -8   1   39.02    1.93
  -2  -8   1   33.94    1.93
   2  -8  -1   37.16    1.94
   0  -8   1    7.56    0.40
   0   8  -1    6.08    0.36
  -2  -8  -1  194.32   11.78
   2  -8   1  191.75   11.41
  -2  -8  -1  183.04   11.46
   2  -8   1  201.16   11.22
  -2   8  -1  204.68   11.66
  -2   8  -1  156.33   10.93
   2   8   1  182.69   11.52
  -4  -8  -1    0.51    0.09
  -4  -8  -1    0.79    0.10
   4   8   1    0.58    0.06
   4   8   1    0.64    0.09
  -4   8  -1    0.83    0.05
   4   8   1    0.92    0.06
  -6  -8  -1    0.89    0.08
   6  -8   1    0.94    0.06
   6  -8   1    0.87    0.10
  -6  -8  -1    1.05    0.15
  -6   8  -1    0.81    0.06
   6   8   1    0.72    0.11
  -6   8  -1    1.06    0.07
   6   8   1    0.78    0.08
  -6   8  -1    0.83    0.09
  -8  -8  -1   53.48    3.16
   8  -8   1   62.69    3.14
   8   8   1   60.21    3.12
  -8   8  -1   61.26    3.14
   8   8   1   61.23    3.16
 -10  -8  -1    1.28    0.18
 -10  -8  -1    1.31    0.10
  10  -8   1    1.34    0.15
  10  -8   1    1.30    0.10
  10   8   1    1.39    0.11
  10   8   1    1.32    0.08
 -10   8  -1    1.20    0.09
 -10   8  -1    1.48    0.09
 -10   8  -1    1.08    0.15
  10   8   1    0.97    0.15
 -12  -8  -1   -0.06    0.05
 -12  -8  -1    0.14    0.12
  12  -8   1    0.11    0.04
  12  -8   1   -0.04    0.08
 -12   8  -1    0.04    0.03
 -12   8  -1    0.06    0.04
  12   8   1    0.05    0.10
  12   8   1    0.06    0.02
  12   8   1    0.01    0.05
 -12   8  -1    0.04    0.08
 -14  -8  -1    4.08    0.24
  14  -8   1    4.06    0.32
 -14  -8  -1    3.80    0.35
  14  -8   1    3.97    0.24
 -14   8  -1    4.11    0.23
 -14   8  -1    4.50    0.32
 -14   8  -1    4.13    0.22
  14   8   1    3.81    0.25
  14   8   1    4.29    0.22
  14   8   1    4.21    0.34
  16  -8   1    3.43    0.31
  16  -8   1    3.18    0.21
 -16  -8  -1    3.32    0.20
 -16  -8  -1    3.71    0.33
 -16   8  -1    3.37    0.30
  16   8   1    3.48    0.32
 -16   8  -1    3.33    0.19
  16   8   1    3.20    0.19
 -16   8  -1    3.46    0.19
  16   8   1    3.30    0.23
 -18  -8  -1    8.13    0.45
  18  -8   1    9.08    0.56
  18  -8   1    8.82    0.47
 -18  -8  -1    7.49    0.57
 -18   8  -1    8.02    0.45
  18   8   1    8.23    0.44
 -18   8  -1    8.31    0.45
  18   8   1    8.07    0.57
 -18   8  -1    9.59    0.58
  18   8   1    8.17    0.47
  20  -8   1    0.98    0.12
 -20  -8  -1    0.82    0.09
  20  -8   1    1.00    0.20
 -20  -8  -1    1.01    0.20
  20   8   1    0.79    0.11
 -20   8  -1    0.87    0.20
  20   8   1    0.94    0.19
 -20   8  -1    0.93    0.07
  20   8   1    0.98    0.08
 -20   8  -1    0.93    0.07
  22  -8   1    0.02    0.14
  22  -8   1   -0.05    0.07
 -22  -8  -1   -0.03    0.04
 -22   8  -1   -0.05    0.05
  22   8   1   -0.11    0.12
 -22   8  -1    0.01    0.15
 -22   8  -1    0.02    0.03
  24  -8   1    0.34    0.09
  24  -8   1    0.39    0.19
 -24  -8  -1    0.50    0.07
 -24   8  -1    0.31    0.17
 -24   8  -1    0.47    0.06
 -24   8  -1    0.26    0.06
  24   8   1    0.18    0.09
 -26  -8  -1    1.29    0.11
  26  -8   1    1.19    0.15
 -26   8  -1    1.27    0.10
 -26   8  -1    1.47    0.10
  26   8   1    1.45    0.16
  28  -8   1    1.41    0.16
 -28  -8  -1    1.22    0.11
 -28   8  -1    1.20    0.11
  28   8   1    1.29    0.16
 -28   8  -1    1.38    0.11
  30  -8   1    0.21    0.09
 -30  -8  -1    0.34    0.06
 -30   8  -1    0.33    0.06
  30   8   1    0.31    0.10
 -32  -8  -1    0.11    0.06
  32  -8   1    0.03    0.09
 -32   8  -1    0.05    0.06
  32   8   1   -0.05    0.09
  34  -8   1    2.18    0.21
 -34  -8  -1    1.87    0.15
  34   8   1    2.12    0.20
 -34   8  -1    2.04    0.14
  36  -8   1   -0.07    0.10
 -36  -8  -1   -0.05    0.06
 -36   8  -1    0.04    0.06
  36   8   1    0.03    0.09
  38  -8   1   -0.16    0.10
 -38   8  -1    0.04    0.06
  38   8   1    0.02    0.10
  39  -9  -1    0.48    0.13
  39   9  -1    0.93    0.12
  37  -9  -1   -0.11    0.10
 -37   9   1    0.32    0.07
  37   9  -1    0.29    0.10
  35  -9  -1   -0.18    0.09
 -35   9   1   -0.10    0.06
  33  -9  -1    0.28    0.11
 -33  -9   1    0.46    0.08
  33   9  -1    0.42    0.10
 -33   9   1    0.39    0.07
 -31  -9   1    0.54    0.08
  31  -9  -1    0.39    0.10
  31   9  -1    0.58    0.11
 -31   9   1    0.64    0.09
  29  -9  -1    0.06    0.09
 -29  -9   1    0.10    0.06
 -29   9   1    0.09    0.05
 -29   9   1    0.11    0.05
  29   9  -1    0.07    0.09
  27  -9  -1    0.26    0.08
 -27  -9   1    0.32    0.06
 -27   9   1    0.26    0.05
  27   9  -1    0.28    0.09
 -27   9   1    0.27    0.06
 -25  -9   1    0.65    0.08
 -25   9   1    0.62    0.08
 -25   9   1    0.58    0.07
  25   9  -1    0.63    0.10
  23  -9  -1    3.14    0.23
 -23  -9   1    3.34    0.20
  23  -9  -1    3.21    0.35
 -23   9   1    3.56    0.36
 -23   9   1    3.28    0.19
  23   9  -1    3.33    0.23
 -23   9   1    3.35    0.19
  21  -9  -1   21.35    1.20
  21  -9  -1   20.53    1.11
 -21  -9   1   20.78    1.09
 -21  -9   1   20.05    1.23
  21   9  -1   21.57    1.11
 -21   9   1   21.77    1.09
  21   9  -1   20.08    1.09
 -21   9   1   19.93    1.09
 -19  -9   1    6.78    0.38
  19  -9  -1    7.11    0.47
  19  -9  -1    7.32    0.39
 -19  -9   1    6.39    0.51
  19   9  -1    7.09    0.49
 -19   9   1    7.31    0.37
  19   9  -1    7.29    0.37
 -19   9   1    7.00    0.37
 -19   9   1    5.66    0.49
  19   9  -1    6.44    0.40
 -17  -9   1   -0.05    0.03
  17  -9  -1   -0.04    0.05
 -17  -9   1   -0.02    0.14
  17  -9  -1   -0.04    0.11
 -17   9   1   -0.09    0.04
  17   9  -1   -0.02    0.12
 -17   9   1   -0.02    0.03
  17   9  -1    0.02    0.03
  17   9  -1   -0.09    0.06
 -15  -9   1    6.52    0.50
  15  -9  -1    6.38    0.45
 -15  -9   1    6.91    0.38
  15   9  -1    7.17    0.37
 -15   9   1    6.87    0.38
  15   9  -1    7.62    0.48
 -15   9   1    6.57    0.47
 -15   9   1    7.21    0.37
  15   9  -1    7.46    0.40
  13  -9  -1    7.20    0.48
 -13  -9   1    8.08    0.43
  13  -9  -1    8.50    0.43
 -13   9   1    8.12    0.42
  13   9  -1    8.33    0.50
 -13   9   1    7.38    0.42
  13   9  -1    8.18    0.42
  13   9  -1    7.41    0.44
  11  -9  -1    8.04    0.46
  11  -9  -1    8.33    0.42
 -11  -9   1    7.94    0.43
 -11  -9   1    7.56    0.51
 -11   9   1    8.00    0.47
  11   9  -1    7.52    0.42
 -11   9   1    7.85    0.42
 -11   9   1    8.01    0.42
  11   9  -1    7.10    0.48
  -9  -9   1    0.49    0.13
   9  -9  -1    0.62    0.05
   9  -9  -1    0.60    0.08
  -9  -9   1    0.72    0.09
   9   9  -1    0.66    0.12
   9   9  -1    0.59    0.08
   9   9  -1    0.76    0.06
  -9   9   1    0.72    0.11
  -9   9   1    0.62    0.06
   7  -9  -1    7.29    0.40
  -7  -9   1    6.75    0.36
   7  -9  -1    6.13    0.34
   7  -9  -1    6.64    0.35
  -7  -9   1    6.83    0.42
  -7   9   1    5.75    0.35
   7   9  -1    6.01    0.34
  -7   9   1    6.21    0.34
   7   9  -1    6.21    0.39
   7   9  -1    6.93    0.35
  -5  -9   1    4.45    0.27
  -5  -9   1    3.72    0.22
   5  -9  -1    3.08    0.24
   5   9  -1    3.61    0.20
   5   9  -1    3.85    0.20
  -5   9   1    3.92    0.20
   5   9  -1    3.55    0.23
   3  -9  -1    6.27    0.37
  -3  -9   1    6.45    0.35
  -3  -9   1    6.31    0.36
   3   9  -1    5.68    0.33
  -3   9   1    6.11    0.33
   3   9  -1    6.22    0.34
   3   9  -1    6.18    0.32
  -1  -9   1   15.81    0.81
   1  -9  -1   16.51    0.83
  -1  -9   1   15.21    0.83
  -1   9   1   14.86    0.80
   1   9  -1   14.44    0.80
   1  -9   1    3.74    0.24
  -1  -9  -1    3.44    0.23
  -1   9  -1    3.59    0.20
   1   9   1    3.61    0.20
  -3  -9  -1   32.40    1.60
   3  -9   1   30.22    1.61
  -3  -9  -1   29.70    1.60
   3   9   1   31.03    1.60
  -3   9  -1   28.50    1.58
  -5  -9  -1    0.33    0.07
  -5  -9  -1    0.26    0.08
   5   9   1    0.31    0.04
  -5   9  -1    0.36    0.04
   5   9   1    0.38    0.04
   5   9   1    0.39    0.08
   7  -9   1    0.50    0.07
  -7  -9  -1    0.63    0.08
  -7  -9  -1    0.41    0.11
   7  -9   1    0.57    0.05
   7   9   1    0.62    0.07
  -7   9  -1    0.40    0.06
   7   9   1    0.57    0.05
   7   9   1    0.40    0.10
  -7   9  -1    0.55    0.05
  -9  -9  -1   18.47    1.14
   9  -9   1   20.91    1.12
   9  -9   1   22.08    1.09
  -9  -9  -1   22.39    1.10
   9   9   1   22.57    1.10
   9   9   1   22.44    1.15
   9   9   1   20.57    1.08
  -9   9  -1   20.28    1.09
  -9   9  -1   20.00    1.08
  -9   9  -1   17.49    1.11
 -11  -9  -1    0.31    0.12
  11  -9   1    0.51    0.07
 -11  -9  -1    0.31    0.05
  11  -9   1    0.28    0.09
 -11   9  -1    0.29    0.04
  11   9   1    0.29    0.12
  11   9   1    0.32    0.06
 -11   9  -1    0.36    0.04
  11   9   1    0.37    0.04
 -11   9  -1    0.40    0.10
  13  -9   1    0.02    0.04
 -13  -9  -1   -0.15    0.10
  13  -9   1    0.06    0.09
  13   9   1    0.10    0.12
  13   9   1   -0.05    0.05
 -13   9  -1   -0.01    0.03
 -13   9  -1    0.01    0.08
  13   9   1   -0.01    0.02
 -15  -9  -1   14.59    0.82
 -15  -9  -1   13.70    0.91
  15  -9   1   17.03    0.83
  15  -9   1   15.96    0.89
  15   9   1   15.18    0.91
 -15   9  -1   14.90    0.81
 -15   9  -1   15.29    0.81
 -15   9  -1   16.22    0.89
  15   9   1   15.10    0.81
  15   9   1   15.88    0.83
  17  -9   1   -0.04    0.13
 -17  -9  -1    0.00    0.05
  17  -9   1    0.06    0.06
 -17  -9  -1    0.05    0.14
 -17   9  -1   -0.05    0.12
  17   9   1    0.11    0.13
  17   9   1   -0.02    0.07
  17   9   1    0.04    0.03
 -17   9  -1    0.02    0.03
 -17   9  -1    0.02    0.03
  19  -9   1   16.09    0.86
 -19  -9  -1   15.57    0.98
 -19  -9  -1   16.63    0.85
  19  -9   1   17.32    0.96
  19   9   1   16.29    0.87
  19   9   1   14.55    0.95
 -19   9  -1   15.41    0.95
 -19   9  -1   16.13    0.84
 -19   9  -1   16.00    0.84
  19   9   1   15.93    0.84
 -21  -9  -1    0.63    0.08
  21  -9   1    0.48    0.08
  21  -9   1    0.58    0.17
 -21  -9  -1    0.35    0.17
  21   9   1    0.48    0.09
 -21   9  -1    0.59    0.08
 -21   9  -1    0.53    0.06
  21   9   1    0.56    0.06
 -21   9  -1    0.53    0.17
  23  -9   1   -0.15    0.17
 -23  -9  -1    0.02    0.05
  23  -9   1   -0.05    0.07
 -23   9  -1   -0.04    0.04
 -23   9  -1    0.00    0.05
  23   9   1   -0.03    0.08
 -23   9  -1   -0.27    0.16
 -25  -9  -1    3.12    0.19
  25  -9   1    3.02    0.25
  25   9   1    2.75    0.24
 -25   9  -1    3.27    0.19
 -25   9  -1    3.15    0.18
 -27  -9  -1    0.50    0.07
  27  -9   1    0.47    0.09
 -27   9  -1    0.47    0.07
  27   9   1    0.41    0.10
 -27   9  -1    0.47    0.06
  29  -9   1    1.41    0.16
 -29  -9  -1    1.33    0.11
  29   9   1    1.26    0.17
 -29   9  -1    1.28    0.11
  31  -9   1   -0.03    0.09
 -31  -9  -1   -0.04    0.05
 -31   9  -1   -0.03    0.06
  31   9   1   -0.06    0.08
 -33  -9  -1    1.94    0.15
  33  -9   1    2.24    0.20
  33   9   1    2.02    0.20
 -33   9  -1    2.18    0.15
  35  -9   1    0.77    0.13
 -35  -9  -1    0.95    0.11
 -35   9  -1    1.12    0.10
  35   9   1    0.54    0.14
  37  -9   1   -0.18    0.10
  37   9   1   -0.01    0.10
 -37   9  -1    0.15    0.07
 -39   9  -1    0.00    0.07
  39   9   1   -0.06    0.09
  38  10  -1   -0.13    0.09
  36  10  -1   -0.09    0.09
 -36  10   1    0.04    0.08
  34 -10  -1   -0.05    0.10
 -34  10   1    0.18    0.06
  34  10  -1    0.07    0.09
  32 -10  -1    0.35    0.10
 -32 -10   1    0.70    0.09
 -32  10   1    0.59    0.08
  32  10  -1    0.45    0.11
 -30 -10   1    0.19    0.06
  30 -10  -1   -0.13    0.09
  30  10  -1    0.06    0.08
 -30  10   1    0.16    0.06
 -28 -10   1    0.58    0.09
  28  10  -1    0.45    0.10
 -28  10   1    0.67    0.09
 -28  10   1    0.56    0.08
  26 -10  -1   -0.10    0.07
 -26 -10   1    0.18    0.07
 -26 -10   1    0.03    0.05
  26  10  -1    0.13    0.08
 -26  10   1    0.02    0.04
 -26  10   1    0.05    0.05
  24 -10  -1    0.37    0.08
 -24 -10   1    0.44    0.07
 -24  10   1    0.56    0.07
  24  10  -1    0.44    0.09
 -24  10   1    0.54    0.08
  22 -10  -1    2.03    0.17
 -22 -10   1    2.16    0.15
  22  10  -1    2.09    0.14
 -22  10   1    2.37    0.32
 -22  10   1    2.21    0.14
  22  10  -1    2.32    0.18
 -22  10   1    2.20    0.14
  20 -10  -1    0.46    0.08
  20 -10  -1    0.43    0.16
 -20 -10   1    0.48    0.07
 -20 -10   1    0.65    0.20
  20  10  -1    0.45    0.08
  20  10  -1    0.63    0.07
 -20  10   1    0.57    0.18
 -20  10   1    0.57    0.07
 -20  10   1    0.52    0.08
  20  10  -1    0.42    0.17
  18 -10  -1    0.88    0.17
 -18 -10   1    0.88    0.10
 -18 -10   1    1.17    0.22
  18 -10  -1    0.93    0.11
 -18  10   1    0.97    0.08
  18  10  -1    1.03    0.08
 -18  10   1    1.09    0.09
 -18  10   1    0.97    0.18
  18  10  -1    0.98    0.12
  18  10  -1    1.03    0.19
 -16 -10   1    0.06    0.15
  16 -10  -1    0.06    0.05
  16 -10  -1    0.03    0.10
 -16 -10   1    0.00    0.05
 -16  10   1    0.04    0.03
 -16  10   1    0.04    0.12
  16  10  -1   -0.06    0.12
  16  10  -1   -0.01    0.03
  16  10  -1    0.02    0.05
 -16  10   1    0.06    0.05
 -14 -10   1   26.69    1.62
  14 -10  -1   31.24    1.53
  14 -10  -1   27.64    1.57
 -14 -10   1   32.53    1.54
 -14  10   1   29.16    1.53
 -14  10   1   27.76    1.52
  14  10  -1   28.36    1.60
  14  10  -1   28.45    1.52
  14  10  -1   29.42    1.54
 -14  10   1   29.92    1.59
  12 -10  -1    1.98    0.18
  12 -10  -1    1.94    0.13
 -12 -10   1    2.10    0.15
 -12 -10   1    1.98    0.25
  12  10  -1    1.69    0.23
 -12  10   1    2.12    0.13
  12  10  -1    2.20    0.13
 -12  10   1    2.26    0.12
 -12  10   1    1.95    0.20
  12  10  -1    2.18    0.15
  10 -10  -1    0.35    0.03
 -10 -10   1    0.35    0.06
  10 -10  -1    0.36    0.07
 -10  10   1    0.35    0.08
  10  10  -1    0.32    0.05
  10  10  -1    0.20    0.10
  10  10  -1    0.29    0.04
 -10  10   1    0.32    0.04
  -8 -10   1    6.27    0.43
   8 -10  -1    7.02    0.41
  -8 -10   1    6.73    0.38
   8 -10  -1    6.87    0.36
   8 -10  -1    6.63    0.35
   8  10  -1    6.61    0.36
  -8  10   1    6.13    0.36
  -8  10   1    7.19    0.36
  -6 -10   1   -0.05    0.06
   6 -10  -1    0.04    0.09
  -6 -10   1   -0.02    0.08
   6  10  -1    0.08    0.03
   6  10  -1    0.00    0.03
   6  10  -1    0.03    0.06
  -6  10   1    0.01    0.03
   4 -10  -1   15.44    0.85
  -4 -10   1   15.44    0.84
  -4 -10   1   15.52    0.85
  -4  10   1   15.64    0.82
   4  10  -1   16.26    0.84
   4  10  -1   16.01    0.82
   4  10  -1   15.24    0.82
  -2 -10   1    2.08    0.15
  -2 -10   1    2.15    0.18
   2 -10  -1    2.49    0.17
  -2  10   1    2.57    0.14
   2  10  -1    2.48    0.13
   0 -10   1    1.66    0.17
   0 -10  -1    2.11    0.17
   0  10  -1    2.17    0.12
   0  10   1    2.12    0.12
   2 -10   1   32.70    1.62
  -2 -10  -1   30.81    1.61
  -2  10  -1   29.83    1.59
   2  10   1   28.62    1.59
  -4 -10  -1   10.00    0.65
  -4 -10  -1   12.37    0.64
   4 -10   1   12.40    0.66
   4  10   1   12.05    0.65
   4  10   1   11.41    0.62
   4  10   1   12.21    0.62
  -4  10  -1   12.44    0.62
   6 -10   1    0.18    0.08
  -6 -10  -1    0.27    0.09
  -6 -10  -1    0.22    0.05
   6  10   1    0.29    0.04
   6  10   1    0.21    0.03
  -6  10  -1    0.20    0.03
   6  10   1    0.24    0.07
  -8 -10  -1    3.24    0.26
   8 -10   1    2.93    0.19
  -8 -10  -1    2.85    0.20
   8 -10   1    3.31    0.17
   8  10   1    3.16    0.17
  -8  10  -1    3.02    0.18
  -8  10  -1    3.12    0.17
   8  10   1    3.02    0.24
  10 -10   1   11.91    0.72
 -10 -10  -1   13.36    0.70
  10 -10   1   14.12    0.69
 -10  10  -1   13.13    0.72
 -10  10  -1   12.95    0.69
  10  10   1   12.11    0.70
  10  10   1   14.78    0.77
  10  10   1   12.58    0.68
 -10  10  -1   12.54    0.69
 -12 -10  -1    7.33    0.41
 -12 -10  -1    8.49    0.51
  12 -10   1    7.64    0.40
  12 -10   1    7.15    0.46
  12  10   1    7.75    0.42
  12  10   1    8.07    0.49
 -12  10  -1    7.65    0.40
 -12  10  -1    6.95    0.40
 -12  10  -1    6.11    0.44
  12  10   1    7.46    0.40
 -14 -10  -1    0.17    0.05
 -14 -10  -1    0.30    0.16
  14 -10   1    0.12    0.05
  14 -10   1    0.26    0.11
 -14  10  -1    0.16    0.10
  14  10   1    0.17    0.13
  14  10   1    0.19    0.04
  14  10   1    0.10    0.06
 -14  10  -1    0.20    0.03
 -14  10  -1    0.20    0.04
 -16 -10  -1    5.79    0.48
 -16 -10  -1    6.35    0.36
  16 -10   1    6.70    0.36
  16 -10   1    6.99    0.46
  16  10   1    5.72    0.45
 -16  10  -1    6.35    0.34
 -16  10  -1    6.35    0.35
  16  10   1    6.57    0.34
  16  10   1    6.85    0.37
 -16  10  -1    5.35    0.43
 -18 -10  -1    2.17    0.28
 -18 -10  -1    1.65    0.12
  18 -10   1    1.47    0.14
  18 -10   1    1.51    0.22
  18  10   1    1.67    0.10
 -18  10  -1    1.56    0.10
  18  10   1    1.58    0.23
 -18  10  -1    1.46    0.10
 -18  10  -1    1.11    0.19
  18  10   1    1.61    0.16
  20 -10   1    1.29    0.22
 -20 -10  -1    1.52    0.25
 -20 -10  -1    1.50    0.11
  20 -10   1    1.31    0.14
 -20  10  -1    1.61    0.11
  20  10   1    1.66    0.16
 -20  10  -1    1.53    0.11
 -20  10  -1    1.21    0.21
  20  10   1    1.43    0.24
  20  10   1    1.67    0.11
 -22 -10  -1    1.03    0.10
  22 -10   1    1.17    0.14
  22 -10   1    0.83    0.21
  22  10   1    0.92    0.09
 -22  10  -1    0.91    0.08
 -22  10  -1    0.71    0.20
 -22  10  -1    1.11    0.09
  22  10   1    1.18    0.14
  24 -10   1    0.13    0.07
 -24 -10  -1    0.10    0.06
 -24  10  -1    0.12    0.04
 -24  10  -1    0.13    0.05
  24  10   1    0.16    0.08
  26 -10   1    2.11    0.19
 -26 -10  -1    1.97    0.14
  26  10   1    1.77    0.18
 -26  10  -1    2.04    0.14
 -26  10  -1    2.04    0.14
 -28 -10  -1    0.07    0.06
  28 -10   1    0.03    0.09
  28  10   1    0.09    0.09
 -28  10  -1    0.02    0.05
  30 -10   1    2.83    0.23
 -30 -10  -1    2.73    0.18
  30  10   1    2.74    0.22
 -30  10  -1    2.70    0.17
 -32 -10  -1    0.65    0.09
  32 -10   1    0.47    0.11
  32  10   1    0.60    0.11
 -32  10  -1    0.59    0.09
 -34 -10  -1    0.83    0.11
  34 -10   1    0.45    0.12
 -34  10  -1    0.92    0.11
  34  10   1    0.81    0.14
  36  10   1    0.18    0.10
 -36  10  -1    0.20    0.07
 -38  10  -1    0.07    0.07
  38  10   1   -0.09    0.09
 -37  11   1   -0.01    0.07
  37  11  -1   -0.14    0.09
  35  11  -1   -0.16    0.09
 -35  11   1   -0.04    0.08
  33  11  -1    0.70    0.11
 -33  11   1    0.94    0.10
 -31 -11   1    0.04    0.06
  31  11  -1    0.13    0.09
 -31  11   1    0.01    0.06
 -29 -11   1    0.66    0.09
 -29  11   1    0.70    0.09
 -29  11   1    0.53    0.07
  29  11  -1    0.50    0.10
 -27 -11   1    1.52    0.12
 -27  11   1    1.45    0.12
  27  11  -1    1.41    0.16
 -27  11   1    1.55    0.11
  25 -11  -1   -0.08    0.07
 -25 -11   1   -0.01    0.05
 -25  11   1   -0.01    0.05
 -25  11   1   -0.01    0.04
  25  11  -1    0.08    0.07
  23 -11  -1    0.17    0.07
 -23 -11   1    0.29    0.06
 -23  11   1    0.30    0.05
  23  11  -1    0.30    0.09
  23  11  -1    0.29    0.05
 -23  11   1    0.27    0.06
  21 -11  -1    6.12    0.34
 -21  11   1    5.17    0.32
 -21  11   1    5.83    0.31
  21  11  -1    5.83    0.32
  19 -11  -1    0.16    0.06
 -19 -11   1    0.34    0.19
 -19 -11   1    0.38    0.06
  19 -11  -1    0.36    0.14
  19  11  -1    0.37    0.05
  19  11  -1    0.28    0.07
 -19  11   1    0.38    0.05
 -19  11   1    0.28    0.05
  19  11  -1    0.40    0.16
 -19  11   1    0.14    0.14
  17 -11  -1    0.19    0.05
 -17 -11   1    0.22    0.06
 -17 -11   1    0.23    0.17
  17  11  -1    0.35    0.14
 -17  11   1    0.22    0.13
  17  11  -1    0.20    0.04
 -17  11   1    0.20    0.04
  17  11  -1    0.12    0.06
 -17  11   1    0.25    0.05
  15 -11  -1    0.19    0.10
  15 -11  -1    0.28    0.05
 -15 -11   1    0.30    0.16
 -15 -11   1    0.32    0.06
 -15  11   1    0.20    0.11
  15  11  -1    0.29    0.04
 -15  11   1    0.35    0.05
 -15  11   1    0.31    0.05
  15  11  -1    0.26    0.07
  15  11  -1    0.12    0.11
 -13 -11   1    1.75    0.27
  13 -11  -1    1.88    0.13
  13 -11  -1    1.92    0.18
 -13 -11   1    1.96    0.15
 -13  11   1    1.96    0.12
  13  11  -1    1.82    0.12
 -13  11   1    2.04    0.13
  13  11  -1    2.14    0.15
  13  11  -1    1.82    0.23
 -13  11   1    2.28    0.21
  11 -11  -1    4.30    0.25
 -11 -11   1    4.52    0.35
 -11 -11   1    3.95    0.24
  11 -11  -1    4.25    0.23
  11  11  -1    3.67    0.30
  11  11  -1    4.05    0.23
 -11  11   1    3.75    0.26
 -11  11   1    3.87    0.23
  11  11  -1    4.07    0.24
   9 -11  -1    2.05    0.12
  -9 -11   1    2.26    0.24
   9 -11  -1    1.63    0.21
  -9 -11   1    1.91    0.14
   9  11  -1    2.10    0.12
  -9  11   1    2.10    0.13
   9  11  -1    2.41    0.20
   9  11  -1    2.24    0.14
   7 -11  -1    3.28    0.24
  -7 -11   1    3.20    0.27
  -7 -11   1    3.46    0.22
  -7  11   1    3.61    0.20
   7  11  -1    3.80    0.24
   7  11  -1    3.54    0.20
   7  11  -1    3.45    0.19
  -5 -11   1   -0.05    0.07
   5 -11  -1    0.00    0.07
  -5 -11   1   -0.13    0.07
   5  11  -1    0.04    0.04
   5  11  -1   -0.02    0.02
   5  11  -1    0.02    0.03
  -5  11   1   -0.03    0.03
   3 -11  -1    5.91    0.34
  -3 -11   1    5.47    0.31
  -3 -11   1    5.37    0.32
   3  11  -1    5.17    0.29
  -3  11   1    5.17    0.29
   3  11  -1    5.52    0.29
  -1 -11   1   19.05    1.01
   1 -11  -1   19.24    1.02
  -1  11   1   18.12    0.99
   1  11  -1   19.17    0.99
  -1 -11  -1   14.77    0.80
   1 -11   1   15.38    0.81
  -1  11  -1   14.57    0.78
   1  11   1   14.56    0.78
  -3 -11  -1    3.53    0.20
  -3 -11  -1    3.15    0.23
   3 -11   1    3.59    0.25
  -3  11  -1    3.48    0.20
   3  11   1    3.60    0.19
   3  11   1    3.75    0.20
  -5 -11  -1   16.24    0.85
   5 -11   1   16.29    0.87
  -5 -11  -1   17.85    0.87
   5  11   1   15.70    0.86
   5  11   1   14.66    0.83
  -5  11  -1   14.98    0.84
   5  11   1   15.93    0.83
  -7 -11  -1    4.65    0.29
   7 -11   1    4.87    0.32
  -7 -11  -1    5.45    0.34
   7  11   1    4.94    0.27
   7  11   1    5.12    0.32
   7  11   1    5.03    0.28
  -7  11  -1    4.85    0.27
  -9 -11  -1    2.35    0.17
  -9 -11  -1    2.96    0.24
   9 -11   1    2.32    0.15
   9  11   1    2.28    0.14
  -9  11  -1    2.21    0.14
   9  11   1    2.28    0.15
   9  11   1    2.22    0.21
 -11 -11  -1    2.78    0.29
  11 -11   1    2.85    0.22
  11 -11   1    2.95    0.17
 -11 -11  -1    2.94    0.19
 -11  11  -1    3.15    0.18
  11  11   1    3.03    0.17
  11  11   1    3.33    0.19
 -11  11  -1    2.70    0.21
 -11  11  -1    3.15    0.17
  11  11   1    3.16    0.28
 -13 -11  -1    0.16    0.14
  13 -11   1    0.09    0.04
  13 -11   1    0.13    0.09
 -13 -11  -1    0.02    0.06
  13  11   1    0.01    0.11
 -13  11  -1    0.13    0.05
 -13  11  -1    0.06    0.04
  13  11   1    0.07    0.03
  13  11   1    0.08    0.05
 -13  11  -1    0.07    0.09
  15 -11   1    1.29    0.11
 -15 -11  -1    1.11    0.20
 -15 -11  -1    1.06    0.11
 -15  11  -1    1.25    0.10
 -15  11  -1    1.14    0.09
  15  11   1    1.18    0.19
  15  11   1    1.28    0.09
  15  11   1    1.23    0.13
 -17 -11  -1    2.31    0.17
  17 -11   1    2.49    0.27
 -17 -11  -1    2.46    0.30
  17 -11   1    2.36    0.17
 -17  11  -1    2.46    0.28
  17  11   1    2.73    0.29
  17  11   1    2.52    0.15
 -17  11  -1    2.37    0.15
  17  11   1    2.58    0.19
 -19 -11  -1    4.11    0.26
  19 -11   1    4.74    0.27
  19 -11   1    4.45    0.38
 -19 -11  -1    4.14    0.42
 -19  11  -1    4.59    0.40
 -19  11  -1    4.44    0.25
  19  11   1    4.87    0.42
 -19  11  -1    4.43    0.25
  19  11   1    4.61    0.25
  19  11   1    4.51    0.29
 -21 -11  -1    0.19    0.06
  21  11   1    0.06    0.04
 -21  11  -1    0.10    0.04
 -21  11  -1    0.18    0.05
 -23 -11  -1    0.41    0.07
  23 -11   1    0.49    0.09
 -23  11  -1    0.45    0.06
 -23  11  -1    0.48    0.07
  23  11   1    0.40    0.05
  23  11   1    0.33    0.09
 -25 -11  -1    0.68    0.09
 -25  11  -1    0.72    0.08
 -25  11  -1    0.82    0.09
  25  11   1    0.57    0.10
 -27 -11  -1    0.21    0.06
 -27  11  -1    0.27    0.05
 -27  11  -1    0.28    0.06
  27  11   1    0.16    0.09
 -29 -11  -1    0.29    0.06
 -29  11  -1    0.16    0.06
  29  11   1    0.17    0.09
 -31 -11  -1    1.32    0.12
  31  11   1    1.12    0.14
 -31  11  -1    1.41    0.12
 -33 -11  -1    0.01    0.06
 -33  11  -1    0.00    0.06
  33  11   1   -0.03    0.09
 -35  11  -1    0.90    0.10
  35  11   1    0.62    0.12
  37  11   1    0.28    0.10
 -37  11  -1    0.52    0.08
  36  12  -1   -0.08    0.09
 -34  12   1    0.01    0.07
  34  12  -1   -0.13    0.10
 -32 -12   1    1.54    0.16
  32  12  -1    0.88    0.13
 -32  12   1    1.31    0.12
 -30 -12   1    0.42    0.08
 -30  12   1    0.41    0.07
  30  12  -1    0.25    0.10
 -30  12   1    0.43    0.06
 -28 -12   1    0.56    0.08
 -28  12   1    0.50    0.06
  28  12  -1    0.42    0.10
 -28  12   1    0.46    0.07
 -26 -12   1    0.19    0.06
  26  12  -1    0.10    0.08
 -26  12   1    0.16    0.05
 -26  12   1    0.09    0.06
 -24 -12   1   -0.01    0.06
 -24  12   1    0.03    0.04
 -24  12   1   -0.02    0.05
  24  12  -1    0.05    0.08
  24  12  -1    0.02    0.04
 -22 -12   1    1.31    0.12
  22  12  -1    1.49    0.16
 -22  12   1    1.44    0.10
  22  12  -1    1.42    0.11
 -22  12   1    1.32    0.11
 -20 -12   1   -0.09    0.06
 -20 -12   1   -0.03    0.19
 -20  12   1    0.00    0.04
  20  12  -1   -0.01    0.04
 -20  12   1   -0.08    0.05
  20  12  -1   -0.07    0.07
 -18 -12   1    0.20    0.18
 -18 -12   1    0.03    0.06
 -18  12   1    0.03    0.05
  18  12  -1    0.10    0.04
 -18  12   1    0.08    0.05
  18  12  -1    0.24    0.15
  18  12  -1    0.05    0.07
 -16 -12   1    5.07    0.43
 -16 -12   1    5.46    0.31
  16 -12  -1    5.18    0.44
  16  12  -1    5.26    0.32
  16  12  -1    5.30    0.42
 -16  12   1    5.29    0.29
  16  12  -1    5.53    0.29
  14 -12  -1   -0.08    0.08
 -14 -12   1   -0.10    0.14
 -14 -12   1    0.07    0.06
  14  12  -1    0.10    0.06
 -14  12   1   -0.01    0.04
  14  12  -1    0.05    0.11
 -14  12   1    0.11    0.09
  14  12  -1    0.09    0.04
 -12 -12   1   -0.01    0.06
  12 -12  -1    0.03    0.09
  12 -12  -1   -0.03    0.05
 -12 -12   1    0.11    0.13
  12  12  -1   -0.01    0.04
  12  12  -1   -0.03    0.04
  12  12  -1    0.05    0.10
 -12  12   1    0.00    0.06
 -12  12   1    0.02    0.03
 -10 -12   1    7.78    0.51
  10 -12  -1    7.33    0.46
 -10 -12   1    7.50    0.42
  10  12  -1    7.42    0.40
  10  12  -1    7.64    0.46
  10  12  -1    7.69    0.41
 -10  12   1    7.12    0.40
  -8 -12   1    1.35    0.20
   8 -12  -1    1.27    0.15
  -8 -12   1    1.34    0.14
  -8  12   1    1.44    0.09
   8  12  -1    1.51    0.10
   8  12  -1    1.19    0.15
   8  12  -1    1.31    0.10
  -6 -12   1    4.47    0.27
  -6 -12   1    3.82    0.30
   6 -12  -1    4.29    0.30
   6  12  -1    4.53    0.24
   6  12  -1    4.62    0.24
  -6  12   1    4.69    0.25
   6  12  -1    4.65    0.27
  -4 -12   1    5.21    0.33
   4 -12  -1    5.09    0.35
  -4 -12   1    5.91    0.32
  -4  12   1    5.23    0.29
   4  12  -1    5.52    0.30
   4  12  -1    5.69    0.30
  -2 -12   1    8.81    0.48
   2 -12  -1    8.05    0.49
  -2  12   1    8.17    0.45
   2  12  -1    9.05    0.46
   0 -12   1   16.45    0.88
   0 -12  -1   15.66    0.87
   0  12   1   17.08    0.85
   0  12  -1   15.28    0.85
   2 -12   1    0.20    0.09
  -2 -12  -1    0.20    0.07
  -2  12  -1    0.16    0.04
   2  12   1    0.25    0.04
  -4 -12  -1    4.58    0.29
  -4 -12  -1    4.49    0.27
   4 -12   1    4.13    0.31
  -4  12  -1    4.91    0.25
   4  12   1    4.70    0.26
   4  12   1    4.61    0.25
  -6 -12  -1    3.66    0.26
   6 -12   1    3.23    0.25
  -6 -12  -1    3.87    0.23
   6  12   1    3.80    0.24
   6  12   1    3.89    0.21
  -6  12  -1    3.74    0.21
  -8 -12  -1   22.70    1.14
   8 -12   1   20.26    1.12
  -8 -12  -1   20.58    1.09
   8  12   1   20.42    1.12
   8  12   1   20.10    1.08
  -8  12  -1   19.33    1.07
   8  12   1   19.92    1.07
 -10 -12  -1    1.19    0.14
 -10 -12  -1    1.53    0.23
  10 -12   1    1.36    0.09
  10  12   1    1.47    0.20
 -10  12  -1    1.40    0.09
  10  12   1    1.63    0.10
  10  12   1    1.59    0.12
  12 -12   1   11.81    0.61
 -12 -12  -1   10.61    0.59
 -12 -12  -1   11.22    0.69
 -12  12  -1    9.90    0.61
  12  12   1   10.86    0.66
  12  12   1   11.14    0.58
  12  12   1   10.95    0.59
 -12  12  -1   11.04    0.58
 -14 -12  -1    2.45    0.30
 -14 -12  -1    2.67    0.18
  14  12   1    2.54    0.15
  14  12   1    2.29    0.18
 -14  12  -1    2.64    0.15
 -14  12  -1    2.81    0.24
  14  12   1    2.85    0.28
 -14  12  -1    2.65    0.16
 -16 -12  -1   -0.01    0.06
 -16 -12  -1    0.27    0.16
  16 -12   1   -0.18    0.16
  16  12   1    0.03    0.14
  16  12   1    0.09    0.06
  16  12   1    0.08    0.03
 -16  12  -1    0.07    0.04
 -16  12  -1    0.01    0.05
 -18 -12  -1    0.37    0.18
 -18 -12  -1    0.07    0.06
  18  12   1    0.14    0.04
 -18  12  -1    0.12    0.04
 -18  12  -1    0.16    0.04
  18  12   1    0.10    0.15
  18  12   1    0.13    0.06
 -20 -12  -1    0.35    0.19
 -20 -12  -1    0.33    0.07
 -20  12  -1    0.36    0.05
  20  12   1    0.34    0.05
 -20  12  -1    0.35    0.04
  20  12   1    0.32    0.08
 -22 -12  -1    0.03    0.06
 -22  12  -1    0.07    0.04
 -22  12  -1    0.08    0.05
  22  12   1    0.02    0.04
  22  12   1    0.09    0.07
 -24 -12  -1    0.10    0.06
  24  12   1    0.06    0.08
 -24  12  -1    0.10    0.05
 -24  12  -1    0.03    0.05
 -26 -12  -1    2.02    0.15
 -26  12  -1    2.05    0.14
 -26  12  -1    1.90    0.14
  26  12   1    1.89    0.19
 -28 -12  -1    0.05    0.06
 -28  12  -1    0.05    0.06
 -28  12  -1    0.03    0.05
  28  12   1   -0.06    0.09
 -30 -12  -1    1.04    0.11
  30  12   1    0.84    0.12
 -30  12  -1    0.99    0.10
 -32 -12  -1    0.07    0.07
 -32  12  -1    0.01    0.06
  32  12   1   -0.03    0.09
 -34 -12  -1    0.14    0.06
 -34  12  -1    0.00    0.06
  34  12   1    0.01    0.09
 -36  12  -1    0.31    0.08
  36  12   1    0.29    0.11
  35  13  -1   -0.19    0.09
  33  13  -1    0.08    0.10
 -31 -13   1    0.07    0.07
  31  13  -1   -0.10    0.10
 -29 -13   1    0.11    0.06
 -29  13   1    0.10    0.05
  29  13  -1    0.08    0.09
 -29  13   1    0.07    0.06
 -27 -13   1    0.71    0.10
 -27  13   1    0.62    0.09
  27  13  -1    0.54    0.11
 -27  13   1    0.70    0.09
 -25 -13   1    0.35    0.07
  25  13  -1    0.23    0.09
  25  13  -1    0.25    0.06
 -25  13   1    0.36    0.06
 -25  13   1    0.40    0.07
 -23 -13   1    0.61    0.10
 -23  13   1    0.61    0.09
 -23  13   1    0.64    0.08
  23  13  -1    0.63    0.10
  23  13  -1    0.68    0.09
 -21 -13   1    0.20    0.07
  21  13  -1    0.17    0.08
  21  13  -1    0.23    0.05
 -21  13   1    0.23    0.05
 -19 -13   1    0.47    0.21
 -19 -13   1    0.52    0.08
 -19  13   1    0.68    0.08
  19  13  -1    0.60    0.09
  19  13  -1    0.62    0.07
  19  13  -1    0.67    0.19
 -17 -13   1    8.84    0.61
 -17 -13   1    8.71    0.47
 -17  13   1    8.42    0.46
  17  13  -1    8.32    0.46
  17  13  -1    8.15    0.48
  17  13  -1    8.85    0.58
 -15 -13   1    0.55    0.17
 -15 -13   1    0.56    0.09
  15 -13  -1    0.70    0.14
  15  13  -1    0.79    0.07
  15  13  -1    0.61    0.15
 -15  13   1    0.66    0.06
  15  13  -1    0.51    0.08
 -13 -13   1   -0.05    0.07
 -13 -13   1    0.12    0.14
  13  13  -1   -0.15    0.10
  13  13  -1   -0.07    0.05
 -13  13   1    0.02    0.03
  13  13  -1    0.01    0.03
 -11 -13   1    9.40    0.54
  11 -13  -1    9.81    0.58
 -11 -13   1   10.01    0.63
  11  13  -1    9.62    0.53
  11  13  -1   10.15    0.60
 -11  13   1   10.58    0.53
  11  13  -1   10.18    0.54
   9 -13  -1    0.42    0.10
  -9 -13   1    0.29    0.09
  -9 -13   1    0.37    0.13
   9  13  -1    0.39    0.05
   9  13  -1    0.45    0.10
   9  13  -1    0.51    0.05
  -9  13   1    0.45    0.05
  -7 -13   1    9.85    0.54
  -7 -13   1    9.95    0.58
   7 -13  -1    9.29    0.55
  -7  13   1    9.05    0.51
   7  13  -1    9.38    0.51
   7  13  -1   10.66    0.55
  -5 -13   1   12.92    0.65
   5 -13  -1   11.28    0.67
  -5 -13   1   11.18    0.64
   5  13  -1   11.72    0.62
  -5  13   1   11.68    0.62
   5  13  -1   11.78    0.62
   3 -13  -1    2.67    0.22
  -3 -13   1    2.44    0.21
   3  13  -1    3.10    0.17
  -3  13   1    2.66    0.16
   1 -13  -1   31.38    1.55
  -1 -13   1   28.23    1.54
  -1  13   1   28.33    1.51
   1  13  -1   27.88    1.51
   1 -13   1    2.10    0.19
  -1 -13  -1    1.75    0.16
   1  13   1    1.90    0.12
  -1  13  -1    1.92    0.12
  -3 -13  -1    3.44    0.24
   3 -13   1    3.35    0.24
  -3  13  -1    3.30    0.19
   3  13   1    3.55    0.19
  -5 -13  -1   13.91    0.75
   5 -13   1   13.50    0.77
  -5 -13  -1   13.60    0.76
  -5  13  -1   13.52    0.73
   5  13   1   15.06    0.74
   5  13   1   13.52    0.73
   7 -13   1    0.20    0.12
  -7 -13  -1    0.01    0.09
  -7 -13  -1    0.07    0.08
   7  13   1    0.02    0.07
  -9 -13  -1    2.74    0.26
   9 -13   1    2.68    0.25
  -9 -13  -1    2.76    0.20
   9  13   1    2.69    0.16
   9  13   1    2.64    0.24
   9  13   1    2.98    0.17
  -9  13  -1    2.80    0.16
 -11 -13  -1    9.12    0.52
 -11 -13  -1   10.23    0.61
  11 -13   1    9.44    0.56
 -11  13  -1    9.68    0.50
  11  13   1    9.59    0.51
  11  13   1    8.90    0.50
  11  13   1    9.29    0.58
 -13 -13  -1   12.27    0.64
 -13 -13  -1   11.30    0.73
  13  13   1   13.06    0.73
 -13  13  -1   11.06    0.62
  13  13   1   11.40    0.62
 -15 -13  -1    4.36    0.27
  15  13   1    4.45    0.28
 -15  13  -1    4.78    0.25
  15  13   1    4.59    0.38
  15  13   1    4.51    0.25
 -17 -13  -1   -0.06    0.06
 -17 -13  -1    0.11    0.17
 -17  13  -1    0.06    0.04
  17  13   1    0.06    0.15
  17  13   1    0.08    0.04
  17  13   1    0.00    0.06
 -17  13  -1    0.04    0.05
 -19 -13  -1    1.31    0.26
 -19 -13  -1    1.69    0.14
  19  13   1    2.02    0.17
 -19  13  -1    1.73    0.12
 -19  13  -1    1.88    0.13
  19  13   1    1.75    0.28
  19  13   1    1.80    0.12
 -21 -13  -1    1.82    0.14
 -21  13  -1    1.90    0.13
  21  13   1    1.89    0.18
 -21  13  -1    1.87    0.13
  21  13   1    1.97    0.13
 -23 -13  -1    0.52    0.08
 -23  13  -1    0.47    0.06
  23  13   1    0.56    0.07
  23  13   1    0.33    0.09
 -23  13  -1    0.48    0.07
 -25 -13  -1    0.00    0.06
 -25  13  -1    0.02    0.04
  25  13   1    0.03    0.08
 -25  13  -1   -0.01    0.05
 -27 -13  -1    0.73    0.10
  27  13   1    0.46    0.10
 -27  13  -1    0.60    0.09
 -27  13  -1    0.72    0.09
 -29 -13  -1    0.46    0.08
  29  13   1    0.35    0.10
 -29  13  -1    0.34    0.07
 -31 -13  -1    0.18    0.07
 -31  13  -1    0.10    0.06
  31  13   1    0.12    0.10
 -33 -13  -1    0.17    0.12
 -33  13  -1    0.03    0.06
  33  13   1   -0.17    0.09
 -35  13  -1    0.06    0.07
  35  13   1   -0.09    0.10
  32 -14  -1    0.46    0.19
 -30 -14   1    0.09    0.07
  30  14  -1   -0.13    0.09
 -30  14   1    0.18    0.06
 -28 -14   1    0.74    0.10
 -28  14   1    0.64    0.09
  28  14  -1    0.44    0.11
 -26 -14   1    0.24    0.07
  26  14  -1   -0.01    0.08
 -26  14   1    0.19    0.05
 -24 -14   1    2.48    0.17
  24  14  -1    2.46    0.16
  24  14  -1    2.06    0.21
 -24  14   1    2.48    0.16
 -22 -14   1    0.51    0.08
 -22  14   1    0.50    0.06
  22  14  -1    0.28    0.09
  22  14  -1    0.44    0.06
  20 -14  -1   -0.16    0.15
 -20 -14   1    0.05    0.06
 -20  14   1    0.04    0.04
  20  14  -1    0.03    0.04
  20  14  -1   -0.03    0.09
 -18 -14   1   11.96    0.63
  18 -14  -1   11.59    0.70
  18  14  -1   12.03    0.62
  18  14  -1   11.49    0.64
 -18  14   1   11.35    0.62
 -16 -14   1    0.17    0.08
  16 -14  -1    0.18    0.11
  16  14  -1    0.29    0.04
 -16  14   1    0.30    0.05
  16  14  -1    0.17    0.07
  14 -14  -1   -0.20    0.12
 -14 -14   1   -0.14    0.07
  14  14  -1   -0.02    0.04
 -14  14   1   -0.03    0.03
 -12 -14   1    3.35    0.32
  12 -14  -1    2.19    0.25
 -12  14   1    3.03    0.17
  12  14  -1    2.95    0.18
  10 -14  -1    0.17    0.09
 -10 -14   1    0.33    0.15
 -10 -14   1    0.08    0.08
 -10  14   1    0.17    0.05
  10  14  -1    0.07    0.09
  10  14  -1    0.26    0.04
   8 -14  -1    3.86    0.30
  -8 -14   1    4.21    0.27
  -8 -14   1    3.81    0.31
   8  14  -1    4.23    0.23
  -8  14   1    4.33    0.23
  -6 -14   1    0.04    0.08
  -6 -14   1    0.09    0.07
   6 -14  -1    0.02    0.08
   6  14  -1    0.04    0.03
   6  14  -1    0.15    0.03
  -6  14   1    0.13    0.03
  -4 -14   1    0.27    0.10
   4 -14  -1    0.38    0.11
   4  14  -1    0.42    0.05
  -4  14   1    0.41    0.05
  -2 -14   1    0.83    0.13
   2 -14  -1    0.80    0.12
  -2  14   1    0.98    0.07
   2  14  -1    1.04    0.07
   0 -14  -1    9.28    0.51
   0 -14   1    8.37    0.51
   0  14   1    8.69    0.47
   0  14  -1    9.14    0.48
   2 -14   1    3.86    0.28
  -2 -14  -1    4.40    0.29
   2  14   1    4.54    0.24
  -2  14  -1    4.41    0.24
   4 -14   1    0.63    0.14
  -4 -14  -1    0.68    0.10
  -4  14  -1    0.75    0.06
   4  14   1    0.70    0.06
  -6 -14  -1    6.44    0.34
   6 -14   1    5.64    0.36
  -6 -14  -1    5.51    0.35
   6  14   1    5.77    0.32
  -6  14  -1    5.56    0.32
   6  14   1    6.05    0.32
  -8 -14  -1    1.43    0.15
  -8 -14  -1    1.18    0.19
   8  14   1    1.65    0.17
   8  14   1    1.81    0.11
  -8  14  -1    1.76    0.11
  10 -14   1    0.32    0.13
 -10 -14  -1    0.39    0.13
  10  14   1    0.34    0.11
  10  14   1    0.39    0.05
 -12 -14  -1    6.64    0.39
  12 -14   1    7.02    0.43
 -12  14  -1    6.62    0.37
  12  14   1    7.07    0.37
  14 -14   1    0.77    0.14
 -14 -14  -1    0.85    0.11
  14  14   1    0.95    0.08
 -14  14  -1    0.88    0.07
 -16 -14  -1    6.21    0.36
 -16  14  -1    5.90    0.34
  16  14   1    6.32    0.36
  16  14   1    6.29    0.34
 -18 -14  -1    5.67    0.31
  18  14   1    5.37    0.29
  18  14   1    5.02    0.32
 -18  14  -1    4.99    0.29
 -20 -14  -1    1.24    0.12
 -20  14  -1    1.15    0.10
  20  14   1    1.29    0.10
  20  14   1    1.10    0.15
 -22 -14  -1    4.40    0.26
  22  14   1    4.39    0.25
 -22  14  -1    4.43    0.25
  22  14   1    4.02    0.29
 -22  14  -1    4.45    0.25
 -24 -14  -1    0.06    0.06
  24  14   1   -0.06    0.08
 -24  14  -1    0.05    0.05
 -24  14  -1    0.04    0.05
 -26 -14  -1    0.04    0.07
  26  14   1   -0.01    0.08
 -26  14  -1    0.04    0.05
 -26  14  -1    0.03    0.04
 -28 -14  -1    0.06    0.06
 -28  14  -1    0.10    0.06
 -28  14  -1    0.07    0.05
  28  14   1   -0.05    0.09
 -30 -14  -1    0.05    0.07
  30  14   1   -0.16    0.09
 -30  14  -1    0.03    0.06
  34  14   1   -0.17    0.09
  33 -15  -1    0.86    0.20
  31 -15  -1    0.62    0.19
  29 -15  -1    0.67    0.19
 -29 -15   1    0.45    0.08
  29  15  -1    0.10    0.10
 -29  15   1    0.42    0.07
 -27 -15   1    0.16    0.07
  27 -15  -1    0.15    0.16
 -27  15   1    0.15    0.05
  27  15  -1   -0.09    0.09
 -25 -15   1    1.74    0.14
  25 -15  -1    1.35    0.20
  25  15  -1    1.35    0.18
  25  15  -1    1.59    0.13
 -25  15   1    1.65    0.12
  23 -15  -1    1.01    0.20
 -23 -15   1    0.97    0.11
  23  15  -1    0.58    0.11
  23  15  -1    1.02    0.10
 -23  15   1    0.93    0.08
 -21 -15   1    0.71    0.10
  21 -15  -1    0.63    0.17
  21  15  -1    0.65    0.08
 -21  15   1    0.61    0.08
  21  15  -1    0.34    0.09
  19 -15  -1    0.38    0.16
 -19 -15   1    0.48    0.09
 -19  15   1    0.58    0.08
  19  15  -1    0.30    0.08
  19  15  -1    0.46    0.06
  17 -15  -1    3.47    0.28
 -17 -15   1    3.88    0.24
 -17  15   1    3.94    0.22
  17  15  -1    3.86    0.22
  15 -15  -1    0.05    0.13
 -15 -15   1    0.13    0.08
 -15  15   1    0.11    0.05
  15  15  -1    0.10    0.04
  13 -15  -1    0.99    0.16
 -13 -15   1    0.83    0.13
  13  15  -1    1.04    0.09
 -13  15   1    1.22    0.08
 -11 -15   1    2.67    0.19
  11 -15  -1    2.76    0.25
 -11  15   1    3.06    0.17
  11  15  -1    2.96    0.17
  -9 -15   1    1.77    0.15
   9 -15  -1    1.42    0.21
  -9  15   1    2.02    0.13
   9  15  -1    1.90    0.12
   7 -15  -1    1.41    0.20
  -7 -15   1    1.33    0.15
   7  15  -1    1.42    0.10
  -7  15   1    1.49    0.11
   5 -15  -1   -0.01    0.10
  -5  15   1    0.14    0.05
   5  15  -1    0.17    0.04
   3 -15  -1    6.35    0.38
   3  15  -1    6.61    0.35
  -3  15   1    6.15    0.34
   1 -15  -1    1.45    0.17
   1  15  -1    1.43    0.10
  -1  15   1    1.51    0.11
   1 -15   1    4.73    0.35
  -1 -15  -1    5.61    0.35
   1  15   1    5.72    0.31
  -1  15  -1    6.04    0.31
  -3 -15  -1    2.45    0.20
   3 -15   1    2.41    0.22
  -3  15  -1    2.62    0.15
  -5 -15  -1    0.82    0.11
   5 -15   1    0.67    0.12
   5  15   1    0.75    0.07
  -5  15  -1    0.85    0.07
   7 -15   1    7.66    0.45
  -7 -15  -1    7.47    0.43
  -7  15  -1    7.60    0.40
   7  15   1    7.28    0.40
   9 -15   1    0.41    0.11
  -9 -15  -1    0.41    0.08
   9  15   1    0.42    0.05
  -9  15  -1    0.40    0.06
  11 -15   1   -0.24    0.12
 -11 -15  -1   -0.07    0.07
  11  15   1   -0.04    0.04
 -11  15  -1    0.01    0.04
  13 -15   1    6.11    0.42
 -13 -15  -1    6.28    0.36
 -13  15  -1    6.25    0.34
  13  15   1    6.13    0.34
  15 -15   1    0.70    0.14
 -15 -15  -1    0.77    0.10
 -15  15  -1    0.81    0.07
  15  15   1    0.85    0.08
  17 -15   1    0.01    0.15
 -17 -15  -1    0.03    0.07
 -17  15  -1    0.01    0.04
  17  15   1    0.03    0.04
 -19 -15  -1    0.06    0.05
  19 -15   1    0.23    0.16
 -19  15  -1    0.04    0.04
  19  15   1    0.01    0.04
  19  15   1   -0.12    0.08
 -21 -15  -1    0.05    0.07
  21  15   1   -0.08    0.08
  21  15   1    0.02    0.05
 -21  15  -1    0.05    0.05
 -23 -15  -1    2.68    0.18
  23  15   1    2.42    0.22
  23  15   1    2.82    0.18
 -23  15  -1    2.63    0.17
 -25 -15  -1    0.36    0.08
 -25  15  -1    0.33    0.06
  25  15   1    0.33    0.10
 -27 -15  -1    0.06    0.06
  27  15   1   -0.08    0.09
 -27  15  -1    0.06    0.05
 -29 -15  -1    0.09    0.07
  29  15   1   -0.10    0.10
 -31 -15  -1    0.04    0.06
  31  15   1   -0.34    0.13
  33 -15   1    2.07    0.28
  32 -16  -1    0.46    0.19
  30 -16  -1    0.64    0.20
 -28 -16   1    0.33    0.08
  28 -16  -1    0.65    0.25
 -28  16   1    0.28    0.06
  26 -16  -1    0.00    0.16
 -26 -16   1    0.13    0.07
 -26  16   1    0.02    0.05
  24 -16  -1    2.50    0.28
 -24 -16   1    2.39    0.18
 -24  16   1    2.25    0.16
  24  16  -1    2.63    0.16
  22 -16  -1    2.02    0.26
 -22 -16   1    2.11    0.16
  22  16  -1    2.01    0.14
 -22  16   1    2.04    0.14
  20 -16  -1    0.04    0.12
 -20 -16   1    0.01    0.07
  20  16  -1    0.02    0.05
 -20  16   1    0.03    0.04
  18 -16  -1    0.42    0.12
 -18 -16   1    0.22    0.08
  18  16  -1    0.29    0.05
 -18  16   1    0.22    0.05
 -16 -16   1    0.33    0.07
  16 -16  -1    0.38    0.14
 -16  16   1    0.29    0.06
  16  16  -1    0.31    0.05
  14 -16  -1    0.21    0.14
 -14 -16   1    0.22    0.08
  14  16  -1    0.27    0.04
 -14  16   1    0.34    0.05
 -12 -16   1    0.86    0.13
  12 -16  -1    1.04    0.17
  12  16  -1    0.95    0.08
 -12  16   1    1.01    0.08
 -10 -16   1   -0.06    0.06
  10 -16  -1   -0.04    0.12
 -10  16   1   -0.03    0.04
  10  16  -1    0.01    0.03
  -8 -16   1   -0.06    0.08
   8 -16  -1   -0.18    0.11
   8  16  -1    0.02    0.04
  -8  16   1   -0.01    0.04
   6 -16  -1   -0.08    0.08
  -6 -16   1    0.01    0.06
  -6  16   1    0.03    0.05
   6  16  -1    0.02    0.04
  -4 -16   1    8.21    0.49
   4 -16  -1    8.29    0.49
  -4  16   1    8.86    0.45
   4  16  -1    8.30    0.45
   2 -16  -1    0.16    0.11
  -2 -16   1    0.15    0.11
   2  16  -1    0.24    0.05
  -2  16   1    0.31    0.04
   0 -16  -1   -0.02    0.07
   0 -16   1   -0.12    0.10
   0  16   1    0.03    0.04
   0  16  -1    0.09    0.04
   2 -16   1   12.80    0.73
  -2 -16  -1   13.48    0.73
  -2  16  -1   12.84    0.70
   2  16   1   13.46    0.70
   4 -16   1    0.01    0.11
  -4 -16  -1    0.11    0.09
   4  16   1    0.17    0.05
  -4  16  -1    0.16    0.05
  -6 -16  -1    0.07    0.09
   6 -16   1    0.09    0.12
  -6  16  -1    0.09    0.04
   6  16   1    0.14    0.03
   8 -16   1    8.24    0.46
  -8 -16  -1    7.37    0.43
   8  16   1    7.46    0.41
  -8  16  -1    7.34    0.41
  10 -16   1    0.29    0.14
 -10 -16  -1    0.42    0.09
 -10  16  -1    0.45    0.06
  10  16   1    0.49    0.06
 -12 -16  -1   -0.08    0.07
  12 -16   1   -0.06    0.13
  12  16   1    0.03    0.03
 -12  16  -1    0.00    0.04
  14 -16   1    0.49    0.15
 -14 -16  -1    0.45    0.10
 -14  16  -1    0.56    0.08
  14  16   1    0.49    0.06
 -16 -16  -1    0.01    0.07
  16 -16   1   -0.06    0.10
 -16  16  -1    0.05    0.04
  16  16   1    0.01    0.04
 -18 -16  -1    0.01    0.07
  18 -16   1   -0.03    0.14
 -18  16  -1    0.06    0.05
  18  16   1    0.03    0.04
  20 -16   1    0.09    0.15
 -20 -16  -1    0.03    0.07
  20  16   1   -0.02    0.04
 -20  16  -1    0.01    0.05
 -22 -16  -1    1.11    0.12
  22 -16   1    1.17    0.21
 -22  16  -1    1.27    0.11
  22  16   1    1.15    0.11
  24 -16   1    0.02    0.17
 -24 -16  -1    0.20    0.07
 -24  16  -1    0.18    0.05
 -26 -16  -1    0.70    0.11
  26 -16   1    0.93    0.21
 -26  16  -1    0.73    0.09
 -28 -16  -1    2.31    0.16
  28 -16   1    2.59    0.29
 -28  16  -1    2.07    0.15
  30 -16   1    0.73    0.20
 -30 -16  -1    0.64    0.09
  32 -16   1    2.10    0.27
  31 -17  -1    0.64    0.20
  29 -17  -1    0.52    0.19
 -29 -17   1    0.19    0.07
 -29  17   1    0.21    0.06
 -27 -17   1    0.10    0.07
  27 -17  -1    0.10    0.17
 -27  17   1    0.05    0.05
  25 -17  -1    0.68    0.19
 -25 -17   1    0.73    0.11
 -25  17   1    0.70    0.09
  23 -17  -1    1.38    0.22
 -23 -17   1    1.52    0.13
  23  17  -1    1.47    0.12
 -23  17   1    1.38    0.11
 -21 -17   1    2.17    0.17
  21 -17  -1    1.97    0.26
 -21  17   1    2.08    0.15
  21  17  -1    2.21    0.15
  19 -17  -1    0.71    0.15
 -19 -17   1    0.58    0.09
  19  17  -1    0.55    0.06
 -19  17   1    0.51    0.07
  17 -17  -1    0.05    0.13
 -17 -17   1    0.14    0.08
 -17  17   1    0.16    0.05
  17  17  -1    0.15    0.05
 -15 -17   1    1.40    0.15
  15 -17  -1    1.46    0.20
 -15  17   1    1.36    0.10
  15  17  -1    1.63    0.11
  13 -17  -1    0.52    0.15
 -13 -17   1    0.74    0.10
  13  17  -1    0.73    0.08
 -13  17   1    0.56    0.07
 -11 -17   1    1.50    0.16
  11 -17  -1    1.45    0.18
  11  17  -1    1.58    0.11
 -11  17   1    1.43    0.10
  -9 -17   1    0.01    0.09
   9 -17  -1    0.05    0.12
  -9  17   1    0.09    0.04
   9  17  -1    0.14    0.05
  -7 -17   1    1.17    0.13
   7 -17  -1    1.02    0.16
   7  17  -1    1.08    0.10
  -7  17   1    1.26    0.10
   5 -17  -1    4.88    0.34
  -5 -17   1    4.99    0.31
  -5  17   1    5.34    0.29
   5  17  -1    5.10    0.28
  -3 -17   1    0.73    0.11
   3 -17  -1    0.76    0.14
  -3  17   1    0.80    0.09
   3  17  -1    0.79    0.07
  -1 -17   1    0.31    0.12
   1 -17  -1    0.26    0.12
   1  17  -1    0.50    0.06
  -1  17   1    0.65    0.06
   1 -17   1    2.46    0.24
  -1 -17  -1    2.42    0.22
   1  17   1    2.89    0.17
  -1  17  -1    3.13    0.17
  -3 -17  -1   10.17    0.58
   3 -17   1   10.35    0.61
   3  17   1   10.71    0.56
  -3  17  -1   10.55    0.56
   5 -17   1    1.89    0.23
  -5 -17  -1    2.45    0.20
   5  17   1    2.56    0.15
  -5  17  -1    2.48    0.15
   7 -17   1    0.32    0.13
  -7 -17  -1    0.36    0.10
   7  17   1    0.49    0.06
  -7  17  -1    0.59    0.08
   9 -17   1    2.46    0.22
  -9 -17  -1    2.30    0.19
   9  17   1    2.39    0.15
  -9  17  -1    2.24    0.14
 -11 -17  -1    0.26    0.07
  11 -17   1    0.25    0.11
  11  17   1    0.28    0.05
 -11  17  -1    0.31    0.05
  13 -17   1    0.05    0.10
 -13 -17  -1    0.06    0.08
  13  17   1    0.08    0.05
 -13  17  -1    0.08    0.04
 -15 -17  -1    2.48    0.19
  15 -17   1    2.35    0.26
 -15  17  -1    2.59    0.16
  15  17   1    2.54    0.16
  17 -17   1   -0.14    0.10
 -17 -17  -1   -0.09    0.07
 -17  17  -1   -0.04    0.04
  17  17   1   -0.02    0.04
  19 -17   1    2.02    0.21
 -19 -17  -1    2.08    0.16
  19  17   1    1.94    0.14
 -19  17  -1    1.99    0.14
  21 -17   1    0.14    0.16
 -21 -17  -1    0.25    0.08
 -21  17  -1    0.22    0.05
  21  17   1    0.23    0.06
 -23 -17  -1    0.08    0.07
  23 -17   1   -0.01    0.16
  23  17   1    0.01    0.06
 -23  17  -1    0.07    0.05
 -25 -17  -1    1.54    0.14
  25 -17   1    1.70    0.24
 -25  17  -1    1.49    0.12
  27 -17   1    0.79    0.21
 -27  17  -1    0.83    0.10
 -29 -17  -1    0.20    0.07
  29 -17   1    0.14    0.18
 -31 -17  -1    0.71    0.10
  31 -17   1    0.86    0.19
  28 -18  -1    0.28    0.18
 -28 -18   1    0.04    0.07
 -28  18   1    0.06    0.06
  26 -18  -1    0.15    0.16
 -26  18   1    0.09    0.06
 -24 -18   1    0.09    0.07
  24  18  -1    0.05    0.06
 -24  18   1    0.00    0.05
  22 -18  -1    1.35    0.21
 -22 -18   1    1.40    0.13
 -22  18   1    1.04    0.10
  22  18  -1    1.17    0.12
 -20 -18   1    0.16    0.08
  20 -18  -1    0.02    0.15
  20  18  -1    0.12    0.05
 -20  18   1    0.17    0.05
  18 -18  -1   -0.08    0.13
 -18 -18   1    0.13    0.08
 -18  18   1    0.06    0.04
  18  18  -1    0.06    0.05
 -16 -18   1    0.97    0.13
  16 -18  -1    0.73    0.18
 -16  18   1    1.04    0.10
  16  18  -1    1.03    0.10
  14 -18  -1    6.57    0.45
 -14 -18   1    6.96    0.40
 -14  18   1    6.99    0.38
  14  18  -1    6.82    0.38
  12 -18  -1    2.14    0.24
 -12 -18   1    2.28    0.18
 -12  18   1    2.25    0.15
  12  18  -1    2.14    0.14
  10 -18  -1   -0.14    0.12
 -10 -18   1   -0.10    0.08
 -10  18   1   -0.01    0.05
  10  18  -1   -0.05    0.04
  -8 -18   1    1.81    0.15
   8 -18  -1    1.93    0.22
  -8  18   1    1.81    0.12
   8  18  -1    1.90    0.12
  -6 -18   1    0.20    0.08
   6 -18  -1    0.30    0.10
   6  18  -1    0.27    0.05
  -6  18   1    0.26    0.05
   4 -18  -1    3.74    0.28
  -4 -18   1    3.59    0.26
   4  18  -1    3.85    0.22
  -4  18   1    3.76    0.22
  -2 -18   1   -0.07    0.10
   2 -18  -1   -0.13    0.08
  -2  18   1   -0.01    0.05
   2  18  -1    0.06    0.04
   0 -18   1    0.05    0.09
   0 -18  -1   -0.01    0.08
   0  18  -1    0.14    0.05
   0  18   1    0.16    0.04
  -2 -18  -1    9.74    0.54
   2 -18   1    9.09    0.55
  -2  18  -1    8.91    0.50
   2  18   1    9.59    0.50
  -4 -18  -1    0.51    0.09
   4 -18   1    0.41    0.13
  -4  18  -1    0.54    0.06
   4  18   1    0.74    0.08
   6 -18   1    0.26    0.10
  -6 -18  -1    0.10    0.10
   6  18   1    0.21    0.05
  -6  18  -1    0.22    0.05
  -8 -18  -1   -0.02    0.09
   8 -18   1   -0.09    0.12
   8  18   1    0.08    0.04
  -8  18  -1    0.08    0.05
 -10 -18  -1    5.68    0.35
  10 -18   1    5.62    0.40
 -10  18  -1    5.82    0.32
  10  18   1    6.00    0.32
 -12 -18  -1    0.78    0.11
  12 -18   1    0.85    0.17
 -12  18  -1    0.78    0.09
  12  18   1    0.74    0.09
  14 -18   1    0.24    0.15
 -14 -18  -1    0.24    0.09
  14  18   1    0.37    0.06
 -14  18  -1    0.27    0.06
 -16 -18  -1    1.40    0.15
  16 -18   1    1.46    0.21
 -16  18  -1    1.68    0.12
  16  18   1    1.69    0.12
 -18 -18  -1    0.21    0.08
  18 -18   1    0.15    0.15
 -18  18  -1    0.30    0.05
  18  18   1    0.25    0.05
  20 -18   1    0.27    0.16
 -20 -18  -1    0.35    0.08
 -20  18  -1    0.35    0.06
  20  18   1    0.39    0.06
  22 -18   1    1.57    0.23
 -22 -18  -1    1.66    0.14
 -22  18  -1    1.52    0.12
  22  18   1    1.58    0.13
 -24 -18  -1    0.42    0.08
  24 -18   1    0.49    0.18
 -24  18  -1    0.39    0.06
 -26 -18  -1    0.17    0.07
  26 -18   1    0.38    0.17
 -26  18  -1    0.10    0.06
  28 -18   1    0.17    0.17
 -28 -18  -1    0.06    0.07
  27 -19  -1    0.26    0.17
 -27 -19   1    0.26    0.08
 -27  19   1    0.15    0.05
 -25 -19   1    0.10    0.07
  25 -19  -1    0.08    0.17
 -25  19   1    0.15    0.05
  23 -19  -1    0.68    0.18
  23  19  -1    0.47    0.07
  21 -19  -1    3.12    0.30
 -21 -19   1    3.02    0.20
 -21  19   1    2.77    0.18
  21  19  -1    2.90    0.19
  19 -19  -1    0.32    0.15
 -19 -19   1    0.15    0.07
 -19  19   1    0.15    0.05
  19  19  -1    0.15    0.05
 -17 -19   1    0.40    0.09
  17 -19  -1    0.41    0.15
  17  19  -1    0.33    0.06
 -17  19   1    0.37    0.06
 -15 -19   1    3.73    0.25
  15 -19  -1    3.66    0.31
  15  19  -1    3.67    0.22
 -15  19   1    3.87    0.22
  13 -19  -1   -0.02    0.10
 -13 -19   1    0.05    0.08
 -13  19   1    0.07    0.05
  13  19  -1    0.05    0.05
 -11 -19   1    0.05    0.07
  11 -19  -1   -0.08    0.13
 -11  19   1    0.08    0.05
  11  19  -1    0.05    0.04
   9 -19  -1    0.67    0.15
  -9 -19   1    0.75    0.10
  -9  19   1    0.74    0.09
   9  19  -1    0.76    0.09
  -7 -19   1   -0.08    0.08
   7 -19  -1    0.03    0.09
   7  19  -1    0.09    0.05
  -7  19   1    0.11    0.04
  -5 -19   1    0.27    0.10
   5 -19  -1    0.27    0.12
  -5  19   1    0.30    0.05
   5  19  -1    0.33    0.06
  -3 -19   1    0.07    0.10
   3 -19  -1    0.19    0.11
   3  19  -1    0.16    0.05
  -3  19   1    0.14    0.05
  -1 -19   1    2.85    0.24
   1 -19  -1    2.97    0.22
  -1  19   1    3.01    0.18
   1  19  -1    2.85    0.17
  -1 -19  -1    0.03    0.09
   1 -19   1    0.06    0.11
  -1  19  -1    0.19    0.04
   1  19   1    0.17    0.04
  -3 -19  -1    0.12    0.10
   3 -19   1    0.24    0.11
  -3  19  -1    0.21    0.04
   3  19   1    0.21    0.05
  -5 -19  -1    0.52    0.09
   5 -19   1    0.56    0.14
   5  19   1    0.52    0.06
  -5  19  -1    0.54    0.06
   7 -19   1    0.02    0.09
  -7 -19  -1   -0.05    0.09
   7  19   1    0.07    0.05
  -7  19  -1   -0.02    0.05
  -9 -19  -1    1.11    0.15
   9 -19   1    1.06    0.17
   9  19   1    1.16    0.10
  -9  19  -1    1.21    0.09
 -11 -19  -1    1.97    0.16
  11 -19   1    1.98    0.24
  11  19   1    2.20    0.14
 -11  19  -1    2.15    0.13
 -13 -19  -1    0.87    0.11
  13 -19   1    0.98    0.16
 -13  19  -1    1.00    0.08
  13  19   1    0.98    0.09
  15 -19   1    1.08    0.20
 -15 -19  -1    1.42    0.13
 -15  19  -1    1.52    0.11
  15  19   1    1.33    0.11
 -17 -19  -1    0.37    0.08
  17 -19   1    0.27    0.16
 -17  19  -1    0.42    0.06
  17  19   1    0.35    0.06
 -19 -19  -1    2.28    0.17
  19 -19   1    2.26    0.26
  19  19   1    2.15    0.15
 -19  19  -1    1.91    0.13
 -21 -19  -1    1.50    0.14
  21 -19   1    1.15    0.25
  21  19   1    1.39    0.12
 -21  19  -1    1.49    0.12
 -23 -19  -1    0.10    0.09
  23 -19   1    0.10    0.15
 -25 -19  -1    0.23    0.08
  25 -19   1    0.20    0.17
 -25  19  -1    0.15    0.06
  27 -19   1    0.42    0.18
 -27 -19  -1    0.25    0.07
 -27  19  -1    0.18    0.06
  26 -20  -1    0.63    0.17
 -26 -20   1    0.33    0.08
 -26  20   1    0.26    0.06
 -24 -20   1    0.11    0.07
  24 -20  -1    0.28    0.16
 -24  20   1    0.12    0.05
  22 -20  -1    1.37    0.21
 -22 -20   1    1.47    0.13
 -22  20   1    1.09    0.11
  22  20  -1    0.94    0.11
 -20 -20   1    1.29    0.13
  20 -20  -1    0.99    0.18
 -20  20   1    0.83    0.11
  20  20  -1    0.87    0.10
 -18 -20   1    4.90    0.29
  18 -20  -1    4.56    0.33
  18  20  -1    4.84    0.28
 -18  20   1    4.90    0.28
 -16 -20   1   -0.02    0.08
  16 -20  -1    0.01    0.13
 -16  20   1    0.02    0.05
  16  20  -1   -0.03    0.05
  14 -20  -1    0.16    0.15
 -14 -20   1    0.29    0.09
 -14  20   1    0.16    0.06
  14  20  -1    0.22    0.04
  12 -20  -1    0.01    0.10
 -12 -20   1    0.07    0.09
 -12  20   1    0.07    0.04
  12  20  -1    0.07    0.05
 -10 -20   1    0.02    0.09
  10 -20  -1    0.10    0.13
 -10  20   1    0.13    0.04
  10  20  -1    0.09    0.05
   8 -20  -1   -0.11    0.12
  -8 -20   1    0.00    0.09
   8  20  -1    0.00    0.04
  -8  20   1    0.01    0.05
  -6 -20   1   -0.16    0.10
   6 -20  -1   -0.04    0.09
   6  20  -1    0.05    0.04
  -6  20   1    0.02    0.05
  -4 -20   1    0.04    0.08
   4 -20  -1   -0.08    0.12
  -4  20   1    0.07    0.05
   4  20  -1    0.08    0.05
   2 -20  -1    0.98    0.15
  -2 -20   1    1.16    0.17
   2  20  -1    1.14    0.09
  -2  20   1    1.08    0.10
   0 -20  -1    0.23    0.11
   0 -20   1    0.26    0.12
   0  20   1    0.27    0.06
   0  20  -1    0.28    0.06
  -2 -20  -1    0.35    0.11
   2 -20   1    0.26    0.13
   2  20   1    0.41    0.05
  -2  20  -1    0.33    0.06
   4 -20   1   -0.09    0.11
  -4 -20  -1   -0.13    0.10
  -4  20  -1    0.00    0.05
   4  20   1    0.00    0.05
   6 -20   1    0.28    0.13
  -6 -20  -1    0.39    0.11
   6  20   1    0.35    0.06
  -6  20  -1    0.34    0.05
  -8 -20  -1    0.63    0.11
   8 -20   1    0.57    0.12
   8  20   1    0.52    0.07
  -8  20  -1    0.44    0.06
  10 -20   1   -0.01    0.10
 -10 -20  -1    0.02    0.06
  10  20   1    0.02    0.05
 -10  20  -1    0.02    0.05
  12 -20   1    1.18    0.18
 -12 -20  -1    1.18    0.15
  12  20   1    1.12    0.10
 -12  20  -1    1.08    0.10
 -14 -20  -1    0.00    0.08
  14 -20   1   -0.13    0.14
  14  20   1    0.00    0.04
 -14  20  -1    0.00    0.05
 -16 -20  -1    0.21    0.08
  16 -20   1    0.07    0.15
 -16  20  -1    0.10    0.05
  16  20   1    0.09    0.05
  18 -20   1    0.14    0.18
 -18 -20  -1    0.23    0.08
  18  20   1    0.14    0.05
 -18  20  -1    0.13    0.05
  20 -20   1    0.76    0.19
  20  20   1    0.51    0.07
 -22 -20  -1    0.38    0.08
  22 -20   1    0.42    0.16
 -22  20  -1    0.19    0.06
 -24 -20  -1   -0.01    0.07
  24 -20   1   -0.07    0.16
 -24  20  -1    0.00    0.05
  26 -20   1    0.55    0.18
 -26 -20  -1    0.39    0.08
 -26  20  -1    0.22    0.06
  23 -21  -1    0.28    0.15
 -23 -21   1    0.22    0.08
  23  21  -1   -0.02    0.06
 -23  21   1    0.01    0.05
  21 -21  -1    0.38    0.16
 -21 -21   1    0.53    0.09
  21  21  -1    0.34    0.07
 -21  21   1    0.30    0.06
 -19 -21   1    0.78    0.12
  19 -21  -1    0.53    0.15
  19  21  -1    0.53    0.07
 -19  21   1    0.45    0.07
  17 -21  -1    1.07    0.16
 -17 -21   1    0.54    0.12
 -17  21   1    0.53    0.07
  17  21  -1    0.63    0.09
 -15 -21   1    0.15    0.09
 -15  21   1    0.16    0.06
  15  21  -1    0.19    0.05
  13 -21  -1   -0.10    0.13
 -13 -21   1    0.07    0.09
  13  21  -1    0.07    0.05
 -13  21   1    0.06    0.05
 -11 -21   1    1.74    0.17
  11 -21  -1    1.77    0.18
  11  21  -1    1.68    0.13
 -11  21   1    1.68    0.13
  -9 -21   1    0.71    0.11
   9 -21  -1    0.61    0.13
  -9  21   1    0.68    0.09
   9  21  -1    0.61    0.09
  -7 -21   1   -0.02    0.10
   7 -21  -1    0.01    0.10
  -7  21   1    0.06    0.04
   7  21  -1    0.11    0.05
   5 -21  -1   -0.12    0.11
  -5 -21   1   -0.05    0.09
  -5  21   1    0.03    0.05
   5  21  -1    0.02    0.04
   3 -21  -1    0.06    0.12
  -3 -21   1    0.08    0.08
  -3  21   1    0.19    0.05
   3  21  -1    0.14    0.05
  -1 -21   1    5.17    0.34
   1 -21  -1    5.40    0.35
   1  21  -1    5.14    0.30
  -1  21   1    5.33    0.30
   1 -21   1    0.67    0.12
  -1 -21  -1    0.68    0.13
  -1  21  -1    0.63    0.07
   1  21   1    0.89    0.09
  -3 -21  -1    0.18    0.11
   3 -21   1    0.12    0.12
   3  21   1    0.29    0.06
  -3  21  -1    0.35    0.06
  -5 -21  -1    1.68    0.19
   5 -21   1    1.83    0.22
  -5  21  -1    1.86    0.13
   5  21   1    1.93    0.13
   7 -21   1    4.53    0.32
  -7 -21  -1    4.24    0.29
  -7  21  -1    4.27    0.25
   7  21   1    4.42    0.25
   9 -21   1    0.94    0.17
  -9 -21  -1    0.86    0.12
   9  21   1    0.82    0.09
  -9  21  -1    0.87    0.08
  11 -21   1    0.08    0.14
 -11 -21  -1    0.24    0.10
 -11  21  -1    0.22    0.04
  11  21   1    0.19    0.06
 -13 -21  -1    0.44    0.10
  13 -21   1    0.47    0.15
 -13  21  -1    0.40    0.06
  13  21   1    0.40    0.05
 -15 -21  -1    0.26    0.08
 -15  21  -1    0.25    0.06
  15  21   1    0.19    0.06
  17 -21   1    0.03    0.15
 -17 -21  -1    0.05    0.08
  17  21   1    0.00    0.05
 -17  21  -1   -0.05    0.05
 -19 -21  -1    0.41    0.09
  19 -21   1    0.36    0.16
 -19  21  -1    0.29    0.06
  19  21   1    0.22    0.06
  21 -21   1   -0.07    0.15
 -21 -21  -1    0.05    0.07
 -21  21  -1   -0.01    0.05
  21  21   1   -0.01    0.05
  23 -21   1    0.21    0.16
 -23 -21  -1    0.08    0.07
 -23  21  -1    0.07    0.05
  20 -22  -1    0.13    0.13
 -20 -22   1    0.26    0.08
 -20  22   1    0.05    0.05
  20  22  -1    0.00    0.06
 -18 -22   1    2.31    0.17
  18 -22  -1    2.19    0.24
 -18  22   1    2.15    0.15
  18  22  -1    2.10    0.15
 -16 -22   1    0.25    0.09
  16 -22  -1    0.19    0.14
  16  22  -1    0.16    0.06
 -16  22   1    0.18    0.06
  14 -22  -1    1.04    0.16
 -14 -22   1    1.07    0.14
  14  22  -1    0.89    0.10
 -14  22   1    0.93    0.10
 -12 -22   1    0.86    0.13
  12 -22  -1    0.89    0.16
  12  22  -1    0.84    0.11
 -12  22   1    0.76    0.09
 -10 -22   1    0.51    0.10
  10  22  -1    0.40    0.06
 -10  22   1    0.37    0.07
   8 -22  -1    2.54    0.24
  -8  22   1    2.68    0.17
   8  22  -1    2.58    0.17
  -6 -22   1    0.09    0.10
   6 -22  -1   -0.09    0.11
   6  22  -1    0.12    0.05
  -6  22   1    0.12    0.05
   4 -22  -1   -0.03    0.12
  -4 -22   1    0.07    0.09
  -4  22   1    0.09    0.05
   4  22  -1    0.08    0.05
  -2 -22   1    1.15    0.14
   2 -22  -1    1.07    0.15
  -2  22   1    1.17    0.09
   2  22  -1    1.16    0.09
   0 -22   1    1.66    0.20
   0 -22  -1    1.74    0.20
   0  22  -1    1.92    0.13
   0  22   1    1.77    0.12
   2 -22   1    0.95    0.16
  -2 -22  -1    1.07    0.15
   2  22   1    1.03    0.10
  -2  22  -1    1.13    0.09
   4 -22   1    0.42    0.11
  -4 -22  -1    0.35    0.11
   4  22   1    0.40    0.06
  -4  22  -1    0.42    0.06
   6 -22   1    9.22    0.55
  -6 -22  -1    9.14    0.52
  -6  22  -1    8.91    0.49
   6  22   1    9.12    0.49
   8 -22   1    0.63    0.15
  -8 -22  -1    0.40    0.11
  -8  22  -1    0.67    0.09
   8  22   1    0.72    0.08
 -10 -22  -1    0.52    0.11
 -10  22  -1    0.60    0.09
  10  22   1    0.61    0.08
 -12 -22  -1    0.71    0.13
  12 -22   1    0.71    0.14
  12  22   1    0.68    0.09
 -12  22  -1    0.68    0.09
  14 -22   1    0.04    0.14
 -14 -22  -1   -0.01    0.07
  14  22   1    0.04    0.05
 -14  22  -1    0.00    0.04
  16 -22   1    1.43    0.20
 -16 -22  -1    1.37    0.14
 -16  22  -1    1.08    0.11
  16  22   1    1.10    0.11
 -18 -22  -1    1.56    0.14
  18 -22   1    1.36    0.20
  18  22   1    1.09    0.11
  20 -22   1    0.14    0.15
 -20 -22  -1    0.21    0.08
  20  22   1   -0.09    0.05
 -20  22  -1    0.02    0.05
 -17 -23   1    1.63    0.14
  17 -23  -1    1.58    0.22
  17  23  -1    1.29    0.12
 -15 -23   1    0.30    0.09
  15 -23  -1    0.28    0.14
 -15  23   1    0.18    0.06
  15  23  -1    0.15    0.06
 -13 -23   1    0.25    0.09
  13 -23  -1    0.19    0.11
  13  23  -1    0.13    0.05
 -13  23   1    0.22    0.06
  11 -23  -1    1.15    0.18
 -11 -23   1    1.29    0.14
  11  23  -1    1.13    0.10
 -11  23   1    1.06    0.09
   9 -23  -1    0.97    0.16
  -9 -23   1    0.94    0.14
   9  23  -1    0.93    0.09
  -9  23   1    0.80    0.08
  -7 -23   1    0.07    0.10
   7 -23  -1   -0.02    0.11
  -7  23   1    0.03    0.04
   7  23  -1    0.06    0.05
  -5 -23   1    0.09    0.10
   5 -23  -1    0.14    0.12
   5  23  -1    0.16    0.04
  -5  23   1    0.07    0.05
  -3 -23   1   -0.02    0.11
   3 -23  -1   -0.12    0.11
  -3  23   1   -0.05    0.04
   3  23  -1   -0.06    0.05
   1 -23  -1    2.55    0.19
  -1  23   1    2.13    0.14
  -1 -23  -1    0.16    0.13
   1 -23   1    0.14    0.20
   1  23   1    0.20    0.05
  -1  23  -1    0.13    0.06
   3 -23   1    0.87    0.14
  -3 -23  -1    1.02    0.14
   3  23   1    0.77    0.08
  -3  23  -1    0.86    0.08
  -5 -23  -1    0.24    0.10
   5 -23   1    0.26    0.12
   5  23   1    0.21    0.06
  -5  23  -1    0.21    0.06
  -7 -23  -1    3.62    0.25
   7 -23   1    3.96    0.29
  -7  23  -1    3.34    0.20
   7  23   1    3.40    0.21
  -9 -23  -1    0.70    0.12
   9 -23   1    0.79    0.15
   9  23   1    0.48    0.07
  -9  23  -1    0.56    0.07
  11 -23   1   -0.04    0.11
 -11 -23  -1    0.13    0.09
  11  23   1    0.10    0.05
 -11  23  -1    0.08    0.04
  13 -23   1    1.25    0.18
 -13 -23  -1    1.45    0.15
  13  23   1    1.32    0.11
 -13  23  -1    1.36    0.11
 -15 -23  -1    0.42    0.09
  15 -23   1    0.16    0.21
  15  23   1    0.12    0.05
 -15  23  -1    0.17    0.05
  17 -23   1    0.32    0.14
 -17 -23  -1    0.26    0.08
 -17  23  -1    0.10    0.05
  17  23   1    0.08    0.06
  14 -24  -1    0.19    0.13
 -14 -24   1    0.16    0.09
 -14  24   1    0.06    0.05
  14  24  -1    0.01    0.05
  12 -24  -1    0.31    0.13
 -12 -24   1    0.50    0.10
  12  24  -1    0.25    0.06
 -12  24   1    0.35    0.06
 -10 -24   1    0.10    0.10
  10 -24  -1    0.04    0.13
 -10  24   1    0.02    0.05
  10  24  -1    0.02    0.04
   8 -24  -1    0.02    0.12
  -8 -24   1    0.04    0.09
   8  24  -1    0.01    0.05
  -8  24   1   -0.05    0.05
   6 -24  -1    0.14    0.12
  -6 -24   1    0.12    0.10
   6  24  -1    0.01    0.05
  -6  24   1    0.00    0.05
  -4 -24   1    0.32    0.11
   4 -24  -1    0.27    0.12
   4  24  -1    0.24    0.06
  -4  24   1    0.20    0.06
  -2 -24   1    0.06    0.11
   2 -24  -1    0.01    0.12
  -2  24   1    0.00    0.04
   2  24  -1   -0.03    0.05
   0 -24  -1    0.03    0.08
   0 -24   1    0.02    0.11
   0  24  -1   -0.02    0.05
   0  24   1   -0.06    0.05
  -2 -24  -1    0.65    0.12
   2 -24   1    0.69    0.14
  -2  24  -1    0.47    0.07
   2  24   1    0.47    0.07
  -4 -24  -1    0.07    0.10
   4 -24   1    0.00    0.10
   4  24   1   -0.01    0.04
  -4  24  -1    0.03    0.04
   6 -24   1    0.33    0.11
  -6 -24  -1    0.31    0.10
   6  24   1    0.21    0.06
  -6  24  -1    0.31    0.06
  -8 -24  -1    0.80    0.12
   8 -24   1    0.65    0.14
  -8  24  -1    0.65    0.09
   8  24   1    0.57    0.07
  10 -24   1    0.03    0.13
 -10 -24  -1    0.16    0.10
 -10  24  -1    0.00    0.05
  10  24   1    0.05    0.04
 -12 -24  -1    0.55    0.10
  12 -24   1    0.45    0.15
  12  24   1    0.37    0.06
 -12  24  -1    0.37    0.06
 -14 -24  -1    0.43    0.09
  14 -24   1    0.66    0.15
  14  24   1    0.30    0.06
 -14  24  -1    0.37    0.06
   9 -25  -1    0.20    0.13
  -9 -25   1    0.15    0.10
   9  25  -1   -0.07    0.04
  -9  25   1    0.03    0.05
   7 -25  -1    0.31    0.13
  -7 -25   1    0.34    0.10
  -7  25   1    0.17    0.06
   7  25  -1    0.22    0.06
  -5 -25   1    1.41    0.16
   5 -25  -1    1.07    0.15
   5  25  -1    0.99    0.10
  -5  25   1    0.98    0.10
   3 -25  -1    0.01    0.11
  -3 -25   1    0.15    0.11
   3  25  -1    0.01    0.04
  -3  25   1   -0.03    0.04
  -1 -25   1    1.17    0.14
   1 -25  -1    1.39    0.18
  -1  25   1    1.06    0.10
   1  25  -1    0.92    0.09
  -1 -25  -1    0.23    0.09
   1 -25   1    0.29    0.12
   1  25   1    0.14    0.06
  -1  25  -1    0.15    0.05
  -3 -25  -1    2.19    0.19
   3 -25   1    1.80    0.20
   3  25   1    1.74    0.13
  -3  25  -1    1.70    0.13
   5 -25   1    0.70    0.13
  -5 -25  -1    0.79    0.12
  -5  25  -1    0.66    0.09
   5  25   1    0.66    0.09
   7 -25   1    0.53    0.13
  -7 -25  -1    0.68    0.11
   7  25   1    0.43    0.07
  -7  25  -1    0.57    0.07
   9 -25   1    0.39    0.14
  -9 -25  -1    0.66    0.11
  -9  25  -1    0.46    0.06
   9  25   1    0.52    0.06
  42   0  -2    0.30    0.10
  40   0  -2    0.10    0.09
  38   0  -2    1.24    0.16
  36   0  -2    1.28    0.16
 -34   0   2    1.63    0.12
  34   0  -2    1.62    0.18
 -32   0   2    0.37    0.06
  32   0  -2    0.35    0.09
 -30   0   2    0.23    0.06
  30   0  -2    0.15    0.08
  28   0  -2    0.14    0.08
 -28   0   2   -0.07    0.04
 -28   0   2    0.02    0.04
 -26   0   2    3.32    0.19
  26   0  -2    3.26    0.23
 -26   0   2    2.89    0.18
 -24   0   2    0.07    0.16
  24   0  -2    0.18    0.08
 -24   0   2    0.26    0.04
 -24   0   2    0.31    0.05
  22   0  -2    2.84    0.22
 -22   0   2    3.04    0.34
 -22   0   2    3.26    0.18
  22   0  -2    3.22    0.29
 -22   0   2    3.41    0.18
  20   0  -2    8.01    0.46
  20   0  -2    8.68    0.55
 -20   0   2    8.27    0.43
 -20   0   2    7.76    0.43
 -20   0   2    7.74    0.56
  18   0  -2    6.79    0.48
  18   0  -2    7.00    0.40
 -18   0   2    6.26    0.47
 -18   0   2    7.11    0.37
 -18   0   2    7.36    0.37
  16   0  -2   16.45    0.84
  16   0  -2   15.84    0.90
 -16   0   2   14.74    0.91
 -16   0   2   15.29    0.81
 -16   0   2   15.33    0.81
  14   0  -2    5.27    0.29
 -14   0   2    4.47    0.26
  14   0  -2    4.80    0.36
 -14   0   2    5.09    0.27
 -14   0   2    5.11    0.36
 -12   0   2   39.95    2.19
  12   0  -2   40.81    2.18
  12   0  -2   41.47    2.13
 -10   0   2    2.40    0.12
 -10   0   2    2.16    0.22
  10   0  -2    1.94    0.20
  10   0  -2    1.85    0.15
 -10   0   2    2.19    0.12
   8   0  -2   19.26    0.98
  -8   0   2   19.01    0.94
  -8   0   2   16.58    0.99
   8   0  -2   16.91    0.94
   6   0  -2   23.49    1.18
  -6   0   2   23.04    1.18
   6   0  -2   19.65    1.15
   4   0  -2   38.22    2.05
  -4   0   2   40.01    2.06
  -2   0   2  703.45   36.22
   2   0  -2  648.35   35.98
  -2   0   2  707.55   36.00
   0   0   2  216.67   11.65
  -2   0  -2    4.25    0.23
  -2   0  -2    4.51    0.23
   2   0   2    4.79    0.26
  -2   0  -2    4.37    0.26
   4   0   2   49.23    2.61
  -4   0  -2   50.03    2.61
  -6   0  -2   12.33    0.65
   6   0   2   11.57    0.66
   6   0   2   11.29    0.62
  -6   0  -2   11.47    0.61
  -8   0  -2  110.63    5.92
   8   0   2  115.65    5.92
 -10   0  -2  100.91    5.30
  10   0   2  100.84    5.30
 -12   0  -2    0.45    0.13
  12   0   2    0.55    0.14
 -12   0  -2    0.51    0.03
  12   0   2    0.49    0.07
 -12   0  -2    0.35    0.04
  14   0   2    3.45    0.23
 -14   0  -2    3.78    0.19
 -14   0  -2    3.28    0.31
 -16   0  -2    1.48    0.09
 -16   0  -2    1.61    0.10
  16   0   2    1.44    0.21
  16   0   2    1.45    0.14
 -16   0  -2    1.22    0.19
  18   0   2   10.60    0.67
 -18   0  -2   10.14    0.66
 -18   0  -2   10.12    0.55
 -18   0  -2   10.25    0.55
  18   0   2   11.03    0.58
 -20   0  -2    3.28    0.30
  20   0   2    3.30    0.23
 -20   0  -2    3.22    0.18
  20   0   2    3.79    0.31
 -20   0  -2    3.22    0.18
  22   0   2    1.02    0.12
  22   0   2    1.18    0.22
 -22   0  -2    1.15    0.09
 -22   0  -2    1.06    0.21
  24   0   2   -0.16    0.09
 -24   0  -2    0.00    0.04
  26   0   2    0.06    0.08
 -26   0  -2    0.04    0.04
 -28   0  -2    0.41    0.06
  28   0   2    0.29    0.09
 -30   0  -2    4.65    0.26
  30   0   2    4.28    0.30
 -32   0  -2    0.11    0.05
  32   0   2    0.02    0.09
 -34   0  -2    2.47    0.16
  34   0   2    2.47    0.22
 -36   0  -2    0.58    0.09
  36   0   2    0.54    0.11
 -38   0  -2    1.34    0.12
  38   0   2    1.24    0.17
  40   0   2    0.00    0.09
  41  -1  -2   -0.04    0.09
  41   1  -2   -0.02    0.09
  39  -1  -2    0.17    0.10
  39   1  -2    0.12    0.09
  37  -1  -2    2.23    0.21
  37   1  -2    2.15    0.20
  35  -1  -2    0.37    0.10
 -35   1   2    0.37    0.07
  35   1  -2    0.35    0.10
  33  -1  -2    0.32    0.10
 -33  -1   2    0.52    0.08
 -33   1   2    0.51    0.07
  33   1  -2    0.33    0.10
 -31  -1   2    0.07    0.05
  31  -1  -2    0.05    0.08
 -31   1   2   -0.01    0.05
  31   1  -2   -0.09    0.08
 -29  -1   2    1.56    0.11
  29  -1  -2    1.68    0.16
 -29   1   2    1.56    0.12
  29   1  -2    1.71    0.16
 -29   1   2    1.58    0.11
 -27  -1   2    0.96    0.09
  27  -1  -2    0.98    0.14
  27   1  -2    0.98    0.12
 -27   1   2    1.02    0.08
 -27   1   2    0.79    0.08
 -25  -1   2    0.52    0.07
  25  -1  -2    0.31    0.08
 -25  -1   2    0.54    0.05
  25   1  -2    0.36    0.09
 -25   1   2    0.46    0.06
 -25   1   2    0.50    0.06
 -23  -1   2    3.98    0.22
  23  -1  -2    3.96    0.37
 -23  -1   2    3.72    0.35
 -23  -1   2    4.25    0.22
  23  -1  -2    4.17    0.26
 -23   1   2    3.41    0.38
  23   1  -2    4.11    0.37
 -23   1   2    4.10    0.22
  23   1  -2    3.88    0.26
 -23   1   2    3.95    0.22
  21  -1  -2    0.07    0.06
 -21  -1   2    0.10    0.15
  21  -1  -2    0.10    0.14
 -21  -1   2    0.09    0.03
 -21  -1   2    0.06    0.03
 -21   1   2    0.06    0.03
 -21   1   2    0.05    0.15
  21   1  -2    0.00    0.07
  21   1  -2    0.19    0.13
 -21   1   2    0.10    0.03
 -19  -1   2   13.94    0.74
  19  -1  -2   15.13    0.77
 -19  -1   2   14.67    0.74
  19  -1  -2   13.62    0.84
 -19  -1   2   12.87    0.84
  19   1  -2   14.54    0.85
 -19   1   2   14.14    0.86
  19   1  -2   13.92    0.76
 -19   1   2   13.65    0.74
 -19   1   2   14.36    0.74
 -17  -1   2    7.47    0.42
 -17  -1   2    7.80    0.54
  17  -1  -2    8.06    0.44
  17  -1  -2    8.34    0.53
 -17  -1   2    7.97    0.42
 -17   1   2    8.18    0.42
 -17   1   2    7.33    0.53
 -17   1   2    7.73    0.42
  17   1  -2    8.01    0.45
  17   1  -2    8.54    0.53
 -15  -1   2   13.08    0.72
 -15  -1   2   15.90    0.72
  15  -1  -2   13.45    0.74
  15  -1  -2   13.45    0.80
  15   1  -2   13.86    0.81
 -15   1   2   13.50    0.82
 -15   1   2   14.28    0.72
 -15   1   2   12.96    0.72
  15   1  -2   13.38    0.74
 -13  -1   2   -0.06    0.11
 -13  -1   2    0.04    0.02
 -13  -1   2    0.08    0.03
  13  -1  -2   -0.01    0.10
  13  -1  -2   -0.12    0.05
 -13   1   2    0.00    0.02
  13   1  -2   -0.10    0.10
 -13   1   2    0.00    0.09
 -13   1   2    0.05    0.02
  11  -1  -2   18.51    0.95
 -11  -1   2   18.34    0.94
 -11  -1   2   17.82    1.01
  11  -1  -2   19.04    1.00
 -11   1   2   15.37    0.94
 -11   1   2   17.69    1.01
  11   1  -2   18.57    1.01
  11   1  -2   18.80    0.95
   9  -1  -2   19.63    0.97
  -9  -1   2   16.39    0.96
   9  -1  -2   19.75    1.01
  -9  -1   2   18.38    1.02
  -9   1   2   18.17    1.02
   9   1  -2   19.24    0.97
   9   1  -2   17.38    1.01
   7  -1  -2  176.67   10.01
  -7  -1   2  162.66   10.30
   7  -1  -2  168.61   10.45
  -7  -1   2  175.02    9.94
   7   1  -2  165.45   10.27
  -7   1   2  166.01    9.91
   7   1  -2  163.14    9.93
  -7   1   2  177.54   10.56
  -5  -1   2    2.72    0.14
   5  -1  -2    2.42    0.18
   5  -1  -2    2.94    0.15
  -5  -1   2    2.55    0.20
  -5   1   2    2.69    0.15
  -5   1   2    2.80    0.19
   5   1  -2    2.73    0.19
   5   1  -2    2.94    0.15
   5   1  -2    2.57    0.15
  -5   1   2    2.79    0.14
   3  -1  -2    7.01    0.36
  -3  -1   2    6.87    0.38
   3  -1  -2    7.15    0.37
   3   1  -2    6.91    0.36
   3   1  -2    6.55    0.36
   3   1  -2    7.73    0.38
  -3   1   2    6.70    0.38
  -3   1   2    5.99    0.36
  -1  -1   2   63.24    3.43
   1  -1  -2   63.35    3.53
   1  -1  -2   52.77    3.90
  -1  -1   2   54.20    3.32
  -1   1   2   58.69    3.50
   1   1  -2   60.81    3.44
   1   1  -2   65.25    3.35
  -1   1   2   60.83    3.73
   1  -1   2   23.20    1.16
  -1  -1  -2   24.20    1.16
  -1   1  -2   20.21    1.15
   1   1   2   20.45    1.16
  -3  -1  -2  108.54    6.15
   3  -1   2  111.93    5.94
  -3   1  -2   99.29    5.97
   3   1   2   96.54    6.21
  -3   1  -2  117.77    5.98
   3   1   2  106.09    6.15
  -5  -1  -2  105.91    5.53
   7  -1   2   26.83    1.59
  -7  -1  -2   30.80    1.63
   7  -1   2   30.71    1.63
   7   1   2   30.51    1.63
  -7   1  -2   34.43    1.63
   7   1   2   29.83    1.59
  -9  -1  -2    4.17    0.22
  -9  -1  -2    4.24    0.22
   9  -1   2    3.59    0.30
  -9  -1  -2    4.07    0.30
   9  -1   2    4.19    0.24
  -9   1  -2    4.13    0.21
   9   1   2    4.18    0.24
   9   1   2    3.94    0.30
  -9   1  -2    3.97    0.29
  -9   1  -2    4.09    0.22
  11  -1   2   39.31    2.05
  11  -1   2   37.26    2.00
 -11  -1  -2   36.53    2.05
  11   1   2   39.41    2.05
 -11   1  -2   37.27    2.05
  11   1   2   39.10    2.00
 -13  -1  -2   29.59    1.65
  13  -1   2   32.02    1.66
  13  -1   2   27.33    1.60
  13   1   2   29.91    1.59
  13   1   2   30.09    1.66
 -13   1  -2   32.63    1.66
 -15  -1  -2    0.16    0.03
 -15  -1  -2    0.15    0.02
  15  -1   2    0.12    0.06
 -15  -1  -2    0.19    0.11
  15  -1   2    0.14    0.10
 -15   1  -2    0.16    0.02
 -15   1  -2    0.17    0.03
  15   1   2    0.11    0.06
  15   1   2    0.14    0.13
  17  -1   2   12.54    0.74
 -17  -1  -2   11.80    0.63
 -17  -1  -2   11.72    0.73
  17  -1   2   12.39    0.66
 -17  -1  -2   11.73    0.63
 -17   1  -2   11.90    0.63
  17   1   2   12.93    0.66
 -17   1  -2   11.30    0.73
  17   1   2   12.76    0.75
 -17   1  -2   11.31    0.63
 -19  -1  -2    0.70    0.16
 -19  -1  -2    0.69    0.07
  19  -1   2    0.60    0.08
  19  -1   2    0.74    0.18
 -19  -1  -2    0.58    0.05
  19   1   2    0.71    0.18
  19   1   2    0.58    0.09
 -19   1  -2    0.72    0.06
 -19   1  -2    0.75    0.05
 -19   1  -2    0.64    0.16
  21  -1   2    0.14    0.15
 -21  -1  -2    0.05    0.02
 -21  -1  -2   -0.08    0.14
 -21  -1  -2    0.08    0.04
  21  -1   2    0.01    0.08
 -21   1  -2    0.15    0.15
 -21   1  -2    0.13    0.03
  21   1   2    0.05    0.08
  21   1   2    0.16    0.16
 -21   1  -2    0.11    0.03
  23  -1   2    3.99    0.26
 -23  -1  -2    3.82    0.22
  23  -1   2    4.11    0.38
 -23  -1  -2    3.16    0.37
 -23   1  -2    3.90    0.21
  23   1   2    3.83    0.26
 -23   1  -2    3.95    0.21
 -23   1  -2    3.25    0.36
  23   1   2    4.08    0.38
 -25  -1  -2    0.08    0.04
  25  -1   2    0.06    0.08
 -25   1  -2    0.12    0.04
  25   1   2    0.06    0.08
  27  -1   2    0.72    0.11
 -27  -1  -2    0.91    0.09
  27   1   2    0.79    0.11
 -27   1  -2    1.07    0.09
 -29  -1  -2    2.59    0.16
  29  -1   2    2.30    0.21
  29   1   2    2.35    0.21
 -29   1  -2    2.64    0.16
  31  -1   2    3.51    0.26
 -31  -1  -2    3.64    0.21
  31   1   2    3.43    0.26
 -31   1  -2    3.64    0.21
 -33  -1  -2    0.04    0.05
  33  -1   2    0.14    0.09
  33   1   2    0.00    0.09
 -33   1  -2    0.08    0.05
  35  -1   2    2.38    0.21
 -35  -1  -2    2.25    0.16
  35   1   2    2.30    0.21
 -35   1  -2    2.39    0.16
  37  -1   2    0.29    0.10
 -37  -1  -2    0.29    0.07
 -37   1  -2    0.27    0.07
  37   1   2    0.27    0.10
  39  -1   2    0.09    0.10
 -39  -1  -2    0.14    0.06
 -39   1  -2    0.13    0.07
  39   1   2    0.12    0.10
  41  -1   2   -0.08    0.09
  41   1   2    0.10    0.10
  40  -2  -2    0.11    0.09
  40   2  -2    0.31    0.09
  38  -2  -2    0.21    0.10
  38   2  -2    0.31    0.10
  36  -2  -2    1.61    0.18
  36   2  -2    1.53    0.17
  34  -2  -2    0.05    0.09
 -34  -2   2    0.01    0.06
 -34   2   2    0.01    0.06
  34   2  -2    0.05    0.09
 -32  -2   2    0.06    0.05
  32  -2  -2    0.10    0.08
  32   2  -2   -0.03    0.08
 -32   2   2    0.00    0.05
 -30  -2   2    0.60    0.09
  30  -2  -2    0.56    0.10
  30   2  -2    0.51    0.10
 -30   2   2    0.67    0.08
 -28  -2   2    0.00    0.04
  28  -2  -2    0.08    0.08
 -28  -2   2    0.12    0.04
 -28   2   2    0.12    0.05
 -28   2   2    0.12    0.04
  28   2  -2    0.08    0.07
 -26  -2   2    2.87    0.16
 -26  -2   2    2.48    0.16
  26  -2  -2    2.56    0.20
 -26   2   2    2.81    0.16
 -26   2   2    2.64    0.16
  26   2  -2    2.61    0.21
  24  -2  -2    0.29    0.08
 -24  -2   2    0.42    0.06
 -24  -2   2    0.28    0.04
  24  -2  -2    0.42    0.20
 -24   2   2    0.26    0.04
  24   2  -2    0.21    0.07
 -24   2   2    0.24    0.18
 -22  -2   2    7.36    0.39
  22  -2  -2    6.54    0.51
  22  -2  -2    7.15    0.42
 -22  -2   2    6.84    0.54
 -22  -2   2    7.42    0.39
  22   2  -2    7.33    0.42
 -22   2   2    7.41    0.39
  22   2  -2    8.26    0.53
 -22   2   2    7.47    0.54
 -22   2   2    7.43    0.39
 -20  -2   2   10.34    0.54
 -20  -2   2   10.17    0.67
  20  -2  -2   10.69    0.66
 -20  -2   2   10.43    0.54
  20  -2  -2   10.41    0.57
  20   2  -2    9.65    0.64
 -20   2   2   10.69    0.54
 -20   2   2    9.25    0.65
 -20   2   2   10.64    0.54
  20   2  -2    9.88    0.57
 -18  -2   2    5.84    0.45
  18  -2  -2    5.97    0.43
 -18  -2   2    5.98    0.32
  18  -2  -2    6.06    0.34
  18   2  -2    5.93    0.41
 -18   2   2    5.27    0.43
 -18   2   2    5.90    0.32
  18   2  -2    5.71    0.35
 -18   2   2    6.19    0.32
  16  -2  -2    3.98    0.34
 -16  -2   2    3.63    0.34
 -16  -2   2    4.51    0.24
  16  -2  -2    4.38    0.26
 -16  -2   2    4.87    0.24
 -16   2   2    3.96    0.36
  16   2  -2    5.01    0.36
 -16   2   2    4.60    0.24
  16   2  -2    4.21    0.27
 -16   2   2    4.47    0.24
 -14  -2   2    6.40    0.45
 -14  -2   2    7.30    0.36
  14  -2  -2    6.45    0.44
  14  -2  -2    6.40    0.38
 -14   2   2    6.22    0.46
 -14   2   2    7.20    0.36
 -14   2   2    7.08    0.36
  14   2  -2    6.53    0.38
  12  -2  -2    8.50    0.52
  12  -2  -2    8.66    0.46
 -12  -2   2    8.33    0.54
 -12  -2   2    8.62    0.45
 -12  -2   2    8.33    0.45
 -12   2   2    8.51    0.45
  12   2  -2    8.55    0.47
 -12   2   2    8.48    0.45
 -12   2   2    8.03    0.53
  12   2  -2    8.79    0.53
  10  -2  -2   16.38    0.92
 -10  -2   2   16.84    0.93
  10  -2  -2   15.45    0.88
  10   2  -2   17.15    0.88
  10   2  -2   16.85    0.92
 -10   2   2   16.62    0.92
 -10   2   2   16.54    0.86
  -8  -2   2    1.66    0.17
  -8  -2   2    1.46    0.09
   8  -2  -2    1.60    0.11
   8  -2  -2    1.67    0.16
   8   2  -2    1.87    0.11
  -8   2   2    1.76    0.09
  -8   2   2    1.55    0.17
   8   2  -2    1.78    0.17
  -8   2   2    1.51    0.09
   8   2  -2    1.64    0.09
  -6  -2   2    7.55    0.46
   6  -2  -2    7.64    0.42
  -6  -2   2    7.89    0.41
   6  -2  -2    8.12    0.44
   6   2  -2    7.86    0.41
  -6   2   2    8.34    0.41
   6   2  -2    8.51    0.42
   6   2  -2    7.78    0.45
  -6   2   2    7.25    0.41
  -6   2   2    7.81    0.46
   4  -2  -2    7.04    0.41
   4  -2  -2    7.87    0.39
  -4  -2   2    7.17    0.42
  -4  -2   2    7.08    0.39
   4   2  -2    7.92    0.40
   4   2  -2    7.74    0.42
  -4   2   2    7.83    0.42
   4   2  -2    7.43    0.39
  -4   2   2    7.13    0.39
  -4   2   2    7.48    0.39
   2  -2  -2    1.29    0.07
  -2  -2   2    1.15    0.10
   2  -2  -2    1.33    0.08
   2  -2  -2    1.55    0.08
  -2  -2   2    1.36    0.08
   2   2  -2    1.23    0.07
  -2   2   2    1.26    0.09
   2   2  -2    1.33    0.07
  -2   2   2    1.26    0.07
   2   2  -2    1.22    0.09
   0  -2  -2    0.94    0.05
   0  -2   2    0.92    0.06
   0  -2  -2    1.03    0.06
   0   2  -2    0.97    0.05
   0   2  -2    0.92    0.05
   0   2   2    0.86    0.05
   0   2   2    0.75    0.07
   0   2  -2    0.82    0.06
   0   2  -2    0.87    0.05
   2  -2   2   10.92    0.57
  -2  -2  -2    8.85    0.56
   2   2   2   11.20    0.58
  -2   2  -2   11.59    0.57
   4  -2   2    0.75    0.06
   4  -2   2    0.77    0.12
  -4  -2  -2    0.84    0.13
  -4  -2  -2    0.76    0.05
   4   2   2    0.82    0.11
   4   2   2    0.98    0.07
  -4   2  -2    0.90    0.05
  -4   2  -2    0.88    0.11
   4   2   2    0.88    0.05
  -4   2  -2    0.94    0.05
  -6  -2  -2   13.79    0.76
  -6  -2  -2   13.93    0.72
   6  -2   2   14.66    0.76
   6  -2   2   14.41    0.72
   6   2   2   13.52    0.72
   6   2   2   12.92    0.76
  -6   2  -2   13.48    0.75
  -6   2  -2   12.68    0.71
  -8  -2  -2   19.49    1.08
   8  -2   2   18.64    1.07
   8  -2   2   19.33    1.03
   8   2   2   20.07    1.04
   8   2   2   19.79    1.08
  -8   2  -2   20.55    1.07
 -10  -2  -2   28.77    1.61
  10  -2   2   27.87    1.60
 -10   2  -2   31.79    1.60
  10   2   2   30.61    1.61
  10   2   2   28.95    1.55
 -12  -2  -2    5.48    0.30
 -12  -2  -2    4.95    0.39
 -12  -2  -2    5.63    0.29
  12  -2   2    5.17    0.31
  12  -2   2    5.88    0.39
  12   2   2    5.29    0.39
 -12   2  -2    5.56    0.30
 -12   2  -2    5.26    0.38
  12   2   2    5.83    0.31
 -12   2  -2    5.78    0.29
 -14  -2  -2   26.47    1.52
 -14  -2  -2   29.08    1.61
  14  -2   2   29.98    1.54
  14  -2   2   31.70    1.61
  14   2   2   29.73    1.61
 -14   2  -2   27.72    1.60
  14   2   2   30.04    1.54
 -16  -2  -2    0.85    0.06
 -16  -2  -2    0.89    0.06
  16  -2   2    0.80    0.17
  16  -2   2    0.89    0.12
 -16  -2  -2    0.82    0.18
 -16   2  -2    0.80    0.16
 -16   2  -2    0.92    0.06
  16   2   2    0.70    0.09
  16   2   2    0.67    0.17
 -16   2  -2    1.00    0.07
 -18  -2  -2    2.13    0.12
  18  -2   2    2.22    0.17
 -18  -2  -2    2.28    0.13
  18  -2   2    1.87    0.27
 -18  -2  -2    2.06    0.27
  18   2   2    1.93    0.18
 -18   2  -2    2.02    0.27
 -18   2  -2    2.28    0.13
  18   2   2    2.06    0.24
 -18   2  -2    2.02    0.12
 -20  -2  -2    3.05    0.18
  20  -2   2    3.23    0.23
 -20  -2  -2    3.68    0.35
  20  -2   2    3.31    0.34
 -20  -2  -2    3.26    0.19
  20   2   2    3.66    0.23
  20   2   2    3.95    0.35
 -20   2  -2    3.48    0.18
 -20   2  -2    3.39    0.34
 -20   2  -2    3.35    0.19
  22  -2   2    5.81    0.45
  22  -2   2    5.83    0.34
 -22  -2  -2    4.74    0.44
 -22  -2  -2    5.62    0.30
 -22   2  -2    5.83    0.29
  22   2   2    5.27    0.34
  22   2   2    5.26    0.42
 -22   2  -2    4.52    0.43
 -22   2  -2    5.67    0.30
  24  -2   2    0.41    0.09
 -24  -2  -2    0.45    0.07
 -24   2  -2    0.32    0.16
 -24   2  -2    0.63    0.07
  24   2   2    0.36    0.10
 -26  -2  -2    0.13    0.05
  26  -2   2    0.10    0.08
 -26   2  -2    0.12    0.04
  26   2   2    0.11    0.08
 -28  -2  -2    0.35    0.06
  28  -2   2    0.26    0.09
  28   2   2    0.29    0.09
 -28   2  -2    0.40    0.06
 -30  -2  -2    1.00    0.09
  30  -2   2    1.17    0.16
 -30   2  -2    0.99    0.09
  30   2   2    0.70    0.12
  32  -2   2    0.86    0.12
 -32  -2  -2    1.02    0.09
 -32   2  -2    1.03    0.10
  32   2   2    0.75    0.12
  34  -2   2    1.91    0.19
 -34  -2  -2    2.00    0.14
  34   2   2    2.03    0.19
 -34   2  -2    1.89    0.14
 -36  -2  -2    0.39    0.07
  36  -2   2    0.41    0.11
  36   2   2    0.38    0.10
 -36   2  -2    0.42    0.07
 -38  -2  -2    0.51    0.08
  38  -2   2    0.52    0.11
  38   2   2    0.42    0.10
 -38   2  -2    0.37    0.08
  40  -2   2   -0.02    0.09
 -40   2  -2   -0.05    0.07
  40   2   2    0.04    0.09
  41  -3  -2    0.33    0.10
  41   3  -2    0.47    0.10
  39  -3  -2    0.68    0.12
  39   3  -2    0.63    0.11
  37  -3  -2    0.00    0.09
  37   3  -2   -0.03    0.10
  35  -3  -2   -0.08    0.08
  35   3  -2   -0.13    0.08
 -35   3   2    0.00    0.06
 -33  -3   2    0.25    0.06
  33  -3  -2    0.31    0.09
  33   3  -2    0.22    0.09
 -33   3   2    0.21    0.06
 -31  -3   2    5.52    0.31
  31  -3  -2    5.52    0.35
 -31   3   2    5.78    0.32
  31   3  -2    5.68    0.35
 -29  -3   2    0.08    0.05
  29  -3  -2    0.03    0.08
 -29   3   2    0.03    0.05
 -29   3   2    0.06    0.04
  29   3  -2    0.06    0.07
  27  -3  -2    0.22    0.08
 -27  -3   2    0.18    0.04
 -27  -3   2    0.06    0.04
  27   3  -2    0.12    0.08
 -27   3   2    0.17    0.04
 -27   3   2    0.22    0.05
 -25  -3   2    2.16    0.14
 -25  -3   2    2.23    0.14
 -25   3   2    2.40    0.14
  25   3  -2    2.25    0.18
 -25   3   2    2.28    0.14
  23  -3  -2    6.49    0.48
 -23  -3   2    6.51    0.35
 -23  -3   2    6.70    0.35
 -23  -3   2    5.98    0.50
  23  -3  -2    6.53    0.38
  23   3  -2    6.33    0.49
 -23   3   2    6.07    0.50
 -23   3   2    6.50    0.35
 -23   3   2    6.70    0.35
  23   3  -2    6.91    0.38
 -21  -3   2    0.95    0.08
  21  -3  -2    0.84    0.18
 -21  -3   2    0.93    0.07
 -21  -3   2    0.73    0.20
  21  -3  -2    0.69    0.09
  21   3  -2    0.97    0.19
 -21   3   2    0.86    0.07
  21   3  -2    0.65    0.10
 -21   3   2    0.59    0.18
 -21   3   2    0.96    0.07
  19  -3  -2   15.25    0.77
 -19  -3   2   13.84    0.87
  19  -3  -2   16.01    0.86
 -19  -3   2   14.13    0.75
 -19  -3   2   12.81    0.75
 -19   3   2   13.86    0.75
  19   3  -2   14.72    0.77
  19   3  -2   14.17    0.84
 -19   3   2   14.06    0.74
 -19   3   2   13.36    0.86
 -17  -3   2   -0.01    0.03
  17  -3  -2    0.08    0.11
  17  -3  -2    0.12    0.06
 -17  -3   2    0.09    0.14
 -17   3   2    0.04    0.12
 -17   3   2    0.08    0.03
  17   3  -2    0.21    0.12
 -17   3   2    0.08    0.03
  17   3  -2    0.12    0.06
 -15  -3   2    0.40    0.06
 -15  -3   2    0.45    0.05
 -15  -3   2    0.40    0.15
  15  -3  -2    0.40    0.06
  15   3  -2    0.42    0.07
 -15   3   2    0.54    0.05
  15   3  -2    0.43    0.13
 -15   3   2    0.43    0.05
 -15   3   2    0.23    0.13
  13  -3  -2    0.09    0.05
  13  -3  -2    0.06    0.10
 -13  -3   2    0.17    0.03
 -13  -3   2    0.09    0.12
  13   3  -2   -0.01    0.11
  13   3  -2    0.11    0.04
 -13   3   2    0.03    0.13
 -13   3   2    0.19    0.03
 -13   3   2    0.14    0.02
 -11  -3   2    0.32    0.03
  11  -3  -2    0.26    0.05
  11  -3  -2    0.13    0.09
 -11  -3   2    0.18    0.12
  11   3  -2    0.24    0.05
  11   3  -2    0.30    0.03
 -11   3   2    0.28    0.11
  11   3  -2    0.28    0.09
  -9  -3   2   11.63    0.61
   9  -3  -2   12.28    0.65
   9  -3  -2   11.26    0.61
  -9  -3   2   11.74    0.68
   9   3  -2   10.59    0.66
  -9   3   2   10.70    0.60
   9   3  -2   11.74    0.60
   9   3  -2   12.17    0.62
  -9   3   2   11.53    0.60
  -9   3   2   11.80    0.66
   7  -3  -2    0.67    0.06
  -7  -3   2    0.65    0.12
  -7  -3   2    0.70    0.05
   7  -3  -2    0.49    0.09
  -7   3   2    0.60    0.10
  -7   3   2    0.70    0.04
   7   3  -2    0.76    0.04
   7   3  -2    0.65    0.07
   7   3  -2    0.65    0.09
  -7   3   2    0.61    0.05
   5  -3  -2   12.78    0.67
   5  -3  -2   14.05    0.70
  -5  -3   2   13.11    0.68
  -5  -3   2   12.28    0.71
  -5   3   2   11.42    0.67
   5   3  -2   12.03    0.70
  -5   3   2   14.79    0.70
   5   3  -2   13.00    0.67
   5   3  -2   12.45    0.68
  -3  -3   2    2.79    0.15
   3  -3  -2    2.57    0.15
  -3  -3   2    2.55    0.18
   3  -3  -2    2.79    0.16
   3  -3  -2    2.90    0.17
   3   3  -2    2.82    0.17
  -3   3   2    3.00    0.17
   3   3  -2    2.81    0.15
  -3   3   2    2.51    0.14
   3   3  -2    2.57    0.14
   1  -3  -2   18.98    1.11
  -1  -3   2   22.27    1.11
   1   3  -2   22.29    1.11
  -1  -3  -2  147.16    8.45
  -1  -3  -2  151.63    8.78
   1  -3   2  148.45    8.15
   1  -3   2  146.56    8.03
   1   3   2  151.61    8.76
  -1   3  -2  133.75    8.01
  -1   3  -2  159.72    8.23
   1   3   2  152.89    8.52
  -3  -3  -2    2.24    0.13
   3  -3   2    2.14    0.16
  -3  -3  -2    2.45    0.17
   3   3   2    2.61    0.13
  -3   3  -2    2.23    0.12
   3   3   2    2.06    0.18
  -3   3  -2    2.32    0.12
  -3   3  -2    2.32    0.15
   3   3   2    2.33    0.12
   5  -3   2   26.94    1.41
  -5  -3  -2   26.14    1.41
   5  -3   2   28.41    1.38
  -5   3  -2   25.27    1.40
   5   3   2   25.33    1.38
   5   3   2   26.67    1.42
  -7  -3  -2   50.74    2.67
   7  -3   2   47.54    2.66
   7   3   2   53.60    2.68
  -7   3  -2   49.92    2.66
   9  -3   2    0.26    0.10
   9  -3   2    0.22    0.05
  -9  -3  -2    0.19    0.04
  -9  -3  -2    0.25    0.11
  -9   3  -2    0.31    0.03
   9   3   2    0.23    0.09
  -9   3  -2    0.24    0.02
   9   3   2    0.25    0.02
  -9   3  -2    0.15    0.09
  11  -3   2   50.47    2.73
  11  -3   2   50.15    2.67
 -11  -3  -2   51.18    2.73
 -11   3  -2   55.49    2.73
  11   3   2   49.79    2.67
  11   3   2   50.08    2.73
  13  -3   2   11.90    0.78
 -13  -3  -2   13.18    0.80
  13  -3   2   13.62    0.73
 -13   3  -2   15.40    0.80
  13   3   2   14.41    0.73
  13   3   2   13.90    0.80
 -13   3  -2   13.00    0.71
 -13   3  -2   12.94    0.71
 -15  -3  -2    0.91    0.16
  15  -3   2    0.97    0.17
 -15  -3  -2    0.90    0.07
  15  -3   2    0.87    0.11
 -15  -3  -2    1.00    0.07
  15   3   2    0.87    0.13
  15   3   2    1.10    0.17
 -15   3  -2    1.04    0.06
 -15   3  -2    0.88    0.16
 -15   3  -2    0.98    0.07
 -17  -3  -2    0.15    0.13
 -17  -3  -2    0.19    0.03
  17  -3   2    0.16    0.14
  17  -3   2    0.17    0.07
 -17  -3  -2    0.16    0.04
 -17   3  -2    0.17    0.13
 -17   3  -2    0.19    0.04
  17   3   2    0.11    0.06
  17   3   2    0.15    0.15
  19  -3   2    0.02    0.07
  19  -3   2    0.21    0.15
 -19  -3  -2    0.18    0.04
 -19  -3  -2    0.21    0.15
 -19  -3  -2    0.11    0.03
  19   3   2    0.24    0.13
 -19   3  -2    0.13    0.04
 -19   3  -2    0.12    0.02
 -19   3  -2   -0.02    0.13
  19   3   2    0.01    0.08
  21  -3   2    0.01    0.14
 -21  -3  -2    0.07    0.03
  21  -3   2   -0.02    0.07
 -21  -3  -2    0.07    0.12
  21   3   2    0.07    0.08
 -21   3  -2    0.08    0.02
 -21   3  -2    0.11    0.14
  21   3   2    0.04    0.16
 -21   3  -2    0.13    0.04
 -23  -3  -2    0.22    0.17
  23  -3   2    0.37    0.17
  23  -3   2    0.42    0.08
 -23  -3  -2    0.44    0.07
  23   3   2    0.48    0.09
 -23   3  -2    0.53    0.07
 -23   3  -2    0.53    0.17
  25  -3   2    1.99    0.18
 -25  -3  -2    1.95    0.12
  25   3   2    1.76    0.18
 -25   3  -2    1.97    0.13
 -27  -3  -2    0.08    0.05
  27  -3   2   -0.05    0.08
  27   3   2   -0.05    0.08
 -27   3  -2    0.12    0.05
  29  -3   2    2.19    0.20
 -29  -3  -2    2.06    0.14
  29   3   2    2.10    0.20
 -29   3  -2    2.18    0.14
  31  -3   2    0.71    0.12
 -31  -3  -2    0.86    0.09
 -31   3  -2    0.98    0.09
  31   3   2    0.75    0.12
  33  -3   2    0.56    0.11
 -33  -3  -2    0.51    0.07
  33   3   2    0.33    0.10
 -33   3  -2    0.59    0.08
 -35  -3  -2    1.56    0.12
  35  -3   2    1.50    0.18
 -35   3  -2    1.63    0.13
  35   3   2    1.72    0.18
 -37  -3  -2    0.02    0.06
  37  -3   2    0.07    0.09
 -37   3  -2    0.05    0.06
  37   3   2    0.16    0.15
  39  -3   2    1.38    0.18
 -39   3  -2    0.95    0.13
  39   3   2    0.85    0.13
  41  -3   2    0.10    0.10
  41   3   2    0.07    0.09
  40  -4  -2    0.90    0.13
  40   4  -2    0.72    0.11
  38  -4  -2    0.02    0.09
  38   4  -2   -0.05    0.09
  36  -4  -2    0.05    0.09
 -36   4   2    0.03    0.07
  36   4  -2    0.06    0.09
  34  -4  -2    1.01    0.13
  34   4  -2    0.86    0.12
 -34   4   2    1.01    0.10
  32  -4  -2    0.30    0.09
 -32  -4   2    0.37    0.07
 -32   4   2    0.32    0.06
  32   4  -2    0.46    0.10
 -30  -4   2    3.12    0.19
  30  -4  -2    3.27    0.23
  30   4  -2    2.91    0.23
 -30   4   2    3.10    0.19
 -30   4   2    3.25    0.19
 -28  -4   2    0.56    0.07
  28  -4  -2    0.57    0.10
 -28  -4   2    0.58    0.07
  28   4  -2    0.56    0.09
 -28   4   2    0.66    0.07
 -26  -4   2    1.19    0.10
  26  -4  -2    1.16    0.14
 -26  -4   2    1.10    0.09
 -26   4   2    1.04    0.09
  26   4  -2    1.10    0.15
 -26   4   2    1.16    0.08
  24  -4  -2    1.14    0.14
 -24  -4   2    0.92    0.08
  24  -4  -2    0.74    0.18
 -24  -4   2    0.96    0.09
 -24   4   2    0.93    0.08
 -24   4   2    0.80    0.08
 -24   4   2    0.79    0.19
  24   4  -2    1.09    0.13
  22  -4  -2    1.50    0.15
  22  -4  -2    1.61    0.23
 -22  -4   2    1.43    0.11
 -22  -4   2    1.61    0.10
 -22  -4   2    1.31    0.24
  22   4  -2    1.70    0.15
 -22   4   2    1.72    0.10
 -22   4   2    1.59    0.11
  22   4  -2    1.25    0.21
 -22   4   2    1.19    0.23
  20  -4  -2    0.48    0.08
 -20  -4   2    0.62    0.16
 -20  -4   2    0.49    0.06
  20  -4  -2    0.55    0.16
 -20  -4   2    0.47    0.06
  20   4  -2    0.44    0.08
 -20   4   2    0.55    0.06
 -20   4   2    0.58    0.05
 -20   4   2    0.52    0.17
  20   4  -2    0.65    0.17
  18  -4  -2    0.02    0.05
 -18  -4   2   -0.07    0.14
 -18  -4   2   -0.05    0.03
 -18  -4   2   -0.03    0.03
  18  -4  -2    0.08    0.12
  18   4  -2    0.04    0.05
 -18   4   2   -0.06    0.03
 -18   4   2    0.05    0.03
  18   4  -2    0.02    0.12
 -18   4   2    0.19    0.12
 -16  -4   2    0.72    0.08
  16  -4  -2    0.83    0.15
 -16  -4   2    0.80    0.16
 -16  -4   2    0.68    0.06
  16  -4  -2    0.98    0.10
 -16   4   2    0.76    0.06
  16   4  -2    0.85    0.16
 -16   4   2    0.72    0.05
  16   4  -2    1.01    0.11
  14  -4  -2    1.14    0.18
 -14  -4   2    1.12    0.08
  14  -4  -2    0.96    0.12
 -14  -4   2    0.91    0.18
  14   4  -2    1.26    0.07
  14   4  -2    1.18    0.17
  14   4  -2    1.03    0.11
 -14   4   2    1.20    0.07
 -14   4   2    0.96    0.16
 -14   4   2    1.12    0.07
  12  -4  -2    1.24    0.19
 -12  -4   2    1.63    0.22
  12  -4  -2    1.25    0.11
 -12  -4   2    1.44    0.09
 -12   4   2    1.70    0.09
  12   4  -2    1.43    0.19
 -12   4   2    1.20    0.18
 -12   4   2    1.70    0.09
  12   4  -2    1.45    0.13
  12   4  -2    1.61    0.09
  10  -4  -2    0.74    0.08
 -10  -4   2    0.78    0.06
  10  -4  -2    0.77    0.11
 -10  -4   2    0.59    0.14
  10   4  -2    0.90    0.05
 -10   4   2    0.69    0.12
  10   4  -2    0.64    0.12
 -10   4   2    0.94    0.06
  10   4  -2    0.77    0.09
 -10   4   2    0.79    0.05
  -8  -4   2  122.84    6.15
   8   4  -2  109.86    6.13
  -8   4   2  119.37    6.13
   6  -4  -2   36.99    1.87
  -6  -4   2   35.88    1.89
   6   4  -2   35.75    1.88
  -6   4   2   33.04    1.87
   4  -4  -2    0.05    0.03
  -4  -4   2   -0.05    0.06
  -4  -4   2    0.00    0.03
   4  -4  -2    0.04    0.01
   4   4  -2    0.01    0.02
   4   4  -2    0.04    0.02
  -4   4   2    0.03    0.02
   4   4  -2    0.02    0.05
  -4   4   2   -0.01    0.04
   2  -4  -2   30.41    1.81
  -2  -4   2   34.05    1.81
  -2  -4   2   38.20    1.82
   2   4  -2   35.97    1.81
   0  -4   2   41.04    2.02
   0   4   2   36.46    2.02
   2  -4   2  201.80   10.53
  -2  -4  -2  192.16   11.27
   2  -4   2  160.30   10.59
  -2  -4  -2  208.55   11.03
  -2   4  -2  182.37   10.74
   2   4   2  202.15   11.36
   2   4   2  203.89   11.07
   4   4   2   96.78    5.06
  -6  -4  -2  173.74    9.06
   8  -4   2   26.14    1.38
  -8  -4  -2   29.39    1.44
  -8   4  -2   26.75    1.42
   8   4   2   24.98    1.38
   8   4   2   24.78    1.43
  10  -4   2    3.97    0.30
 -10  -4  -2    3.31    0.30
  10  -4   2    4.05    0.23
 -10  -4  -2    3.74    0.21
 -10   4  -2    4.05    0.21
  10   4   2    4.06    0.23
  10   4   2    3.90    0.30
 -10   4  -2    3.35    0.28
 -10   4  -2    3.91    0.21
  10   4   2    3.79    0.20
 -12  -4  -2    9.53    0.59
  12  -4   2   10.80    0.52
  12  -4   2    8.61    0.59
 -12  -4  -2   10.03    0.51
  12   4   2    9.74    0.54
  12   4   2    9.35    0.50
 -12   4  -2    9.44    0.50
 -12   4  -2    9.91    0.51
 -12   4  -2    8.16    0.58
  12   4   2   10.16    0.60
  14  -4   2   42.65    2.23
  14  -4   2   40.07    2.16
 -14   4  -2   40.83    2.22
  14   4   2   43.69    2.24
  14   4   2   39.25    2.17
  16  -4   2    0.38    0.07
 -16  -4  -2    0.35    0.04
 -16  -4  -2    0.34    0.04
  16  -4   2    0.45    0.14
 -16  -4  -2    0.40    0.15
  16   4   2    0.38    0.07
 -16   4  -2    0.37    0.04
  16   4   2    0.35    0.15
 -16   4  -2    0.31    0.13
 -16   4  -2    0.35    0.04
  18  -4   2   -0.12    0.06
  18  -4   2    0.03    0.13
 -18  -4  -2   -0.01    0.03
 -18  -4  -2   -0.11    0.13
  18   4   2   -0.09    0.07
 -18   4  -2    0.00    0.02
 -18   4  -2   -0.01    0.12
  18   4   2    0.07    0.13
 -20  -4  -2    2.38    0.31
  20  -4   2    2.47    0.30
 -20  -4  -2    2.57    0.16
  20  -4   2    2.35    0.21
 -20  -4  -2    2.53    0.15
 -20   4  -2    2.73    0.30
  20   4   2    2.82    0.31
 -20   4  -2    2.60    0.16
 -20   4  -2    2.81    0.15
  20   4   2    2.67    0.21
 -22  -4  -2    0.06    0.12
  22  -4   2    0.22    0.16
 -22  -4  -2    0.22    0.05
 -22  -4  -2    0.15    0.04
  22  -4   2    0.29    0.08
 -22   4  -2    0.31    0.04
  22   4   2    0.25    0.08
 -22   4  -2    0.31    0.15
  22   4   2    0.42    0.17
 -22   4  -2    0.25    0.05
  24  -4   2    2.02    0.18
 -24  -4  -2    1.80    0.12
 -24   4  -2    1.85    0.11
 -24   4  -2    1.37    0.23
  24   4   2    1.88    0.17
 -24   4  -2    1.86    0.12
  26  -4   2    0.44    0.10
  26   4   2    0.31    0.09
 -26   4  -2    0.54    0.07
  28  -4   2    2.10    0.20
 -28  -4  -2    2.23    0.14
  28   4   2    1.83    0.20
 -28   4  -2    2.17    0.14
  30  -4   2    0.36    0.10
 -30  -4  -2    0.49    0.06
  30   4   2    0.31    0.10
 -30   4  -2    0.46    0.06
 -32  -4  -2    1.03    0.10
  32  -4   2    0.90    0.13
 -32   4  -2    1.06    0.10
  32   4   2    1.15    0.16
 -34  -4  -2    1.58    0.13
  34  -4   2    1.83    0.19
  34   4   2    1.83    0.20
 -34   4  -2    1.81    0.13
  36  -4   2    0.35    0.11
 -36  -4  -2    0.29    0.06
  36   4   2    0.30    0.10
 -36   4  -2    0.33    0.07
 -38  -4  -2    1.54    0.13
  38   4   2    1.50    0.18
 -38   4  -2    1.63    0.13
  40  -4   2    0.04    0.10
  40   4   2    0.14    0.10
 -40   4  -2    0.10    0.07
  41  -5  -2    0.24    0.11
  41   5  -2    0.29    0.10
  39  -5  -2    0.24    0.10
  39   5  -2    0.32    0.10
  37  -5  -2    0.16    0.09
  37   5  -2    0.14    0.10
  35  -5  -2    0.16    0.10
  35   5  -2    0.03    0.09
 -35   5   2    0.05    0.06
  33  -5  -2    1.35    0.18
 -33  -5   2    1.32    0.12
  33   5  -2    1.37    0.17
 -33   5   2    1.29    0.11
  31  -5  -2    1.45    0.16
 -31  -5   2    1.37    0.11
  31   5  -2    1.62    0.17
 -31   5   2    1.37    0.12
 -29  -5   2    0.33    0.07
  29  -5  -2    0.33    0.09
 -29   5   2    0.38    0.05
  29   5  -2    0.32    0.09
 -29   5   2    0.37    0.06
  27  -5  -2    0.81    0.10
 -27  -5   2    0.68    0.07
 -27  -5   2    0.72    0.08
  27   5  -2    0.58    0.10
 -27   5   2    0.73    0.07
 -27   5   2    0.72    0.08
 -25  -5   2   -0.02    0.04
 -25  -5   2    0.00    0.04
  25   5  -2   -0.02    0.07
 -25   5   2   -0.02    0.04
 -25   5   2   -0.03    0.03
  23  -5  -2    2.46    0.18
 -23  -5   2    2.14    0.14
  23  -5  -2    2.20    0.28
 -23  -5   2    1.62    0.27
 -23  -5   2    2.09    0.14
 -23   5   2    2.28    0.14
  23   5  -2    2.49    0.18
 -23   5   2    2.43    0.31
 -23   5   2    2.35    0.14
 -21  -5   2    1.05    0.22
 -21  -5   2    1.55    0.11
 -21  -5   2    1.20    0.09
  21  -5  -2    1.66    0.22
  21  -5  -2    1.20    0.14
 -21   5   2    1.35    0.09
 -21   5   2    1.53    0.09
  21   5  -2    1.28    0.14
  21   5  -2    1.16    0.21
 -21   5   2    1.20    0.22
 -19  -5   2    2.30    0.16
  19  -5  -2    2.44    0.18
 -19  -5   2    2.39    0.15
  19  -5  -2    2.77    0.27
 -19  -5   2    2.43    0.31
  19   5  -2    2.51    0.19
 -19   5   2    2.27    0.29
  19   5  -2    2.55    0.28
 -19   5   2    2.64    0.15
 -19   5   2    2.63    0.14
  17  -5  -2    1.13    0.11
 -17  -5   2    1.01    0.07
 -17  -5   2    0.97    0.17
  17  -5  -2    1.08    0.17
  17   5  -2    1.03    0.07
  17   5  -2    1.02    0.12
 -17   5   2    0.96    0.07
 -17   5   2    0.72    0.16
  17   5  -2    0.94    0.17
 -17   5   2    0.95    0.07
  15  -5  -2    0.29    0.06
  15  -5  -2    0.33    0.11
 -15  -5   2    0.20    0.14
 -15  -5   2    0.31    0.05
 -15   5   2    0.24    0.12
  15   5  -2    0.28    0.04
  15   5  -2    0.30    0.06
 -15   5   2    0.26    0.04
  15   5  -2    0.51    0.12
 -15   5   2    0.29    0.04
  13  -5  -2    0.78    0.08
 -13  -5   2    0.77    0.07
  13  -5  -2    0.75    0.13
 -13  -5   2    0.93    0.17
 -13   5   2    0.71    0.14
 -13   5   2    0.86    0.06
  13   5  -2    0.63    0.21
  13   5  -2    0.96    0.06
  13   5  -2    0.85    0.10
  11  -5  -2    3.79    0.25
 -11  -5   2    3.33    0.18
  11  -5  -2    3.04    0.19
 -11   5   2    3.12    0.26
  11   5  -2    2.89    0.25
 -11   5   2    3.07    0.17
  11   5  -2    3.01    0.19
 -11   5   2    3.17    0.17
  11   5  -2    3.23    0.17
   9  -5  -2   37.71    2.00
   9  -5  -2   38.41    2.03
  -9  -5   2   41.02    2.06
   9   5  -2   33.26    2.00
   9   5  -2   43.42    2.05
  -9   5   2   36.20    2.04
  -7  -5   2    5.98    0.34
   7  -5  -2    6.06    0.33
  -7  -5   2    5.34    0.39
   7  -5  -2    6.18    0.36
   7   5  -2    6.88    0.34
  -7   5   2    6.32    0.33
   7   5  -2    6.49    0.33
  -7   5   2    6.48    0.33
  -7   5   2    5.31    0.37
   7   5  -2    6.97    0.38
  -5  -5   2   55.42    2.98
   5   5  -2   62.81    2.97
  -5   5   2   51.66    2.96
   3  -5  -2   23.74    1.16
  -3  -5   2   21.39    1.17
  -3  -5   2   21.77    1.15
  -3   5   2   20.93    1.15
   3   5  -2   21.55    1.16
   1  -5  -2   31.54    1.50
  -1  -5   2   28.69    1.50
  -1  -5   2   26.77    1.50
  -1   5   2   27.04    1.49
  -1   5   2   28.10    1.49
   1   5  -2   29.05    1.49
   1  -5   2  224.57   12.41
  -1  -5  -2  220.89   13.31
   1  -5   2  219.27   12.61
  -1  -5  -2  200.38   12.72
   1   5   2  252.39   13.09
  -1   5  -2  237.43   12.49
  -1   5  -2  233.64   12.73
   1   5   2  221.66   13.32
  -3  -5  -2   35.85    1.67
   3  -5   2   28.60    1.66
  -3  -5  -2   29.63    1.65
  -3   5  -2   31.41    1.65
   3   5   2   32.28    1.67
  -5  -5  -2   20.67    1.04
   5  -5   2   20.04    1.02
   5  -5   2   19.22    1.00
   5   5   2   19.16    1.04
   5   5   2   18.01    1.00
  -5   5  -2   17.37    0.99
  -5   5  -2   19.23    1.02
   7  -5   2   34.97    1.64
  -7  -5  -2   31.96    1.61
  -7  -5  -2   28.52    1.65
   7   5   2   29.91    1.65
  -7   5  -2   29.96    1.63
   7   5   2   28.96    1.61
  -9  -5  -2    3.33    0.27
  -9  -5  -2    3.11    0.18
   9  -5   2    2.85    0.24
   9  -5   2    3.06    0.19
   9   5   2    3.25    0.17
   9   5   2    3.03    0.20
  -9   5  -2    3.29    0.17
   9   5   2    2.83    0.26
  -9   5  -2    3.30    0.17
  -9   5  -2    3.30    0.24
  11  -5   2   26.08    1.62
  11  -5   2   33.06    1.68
 -11  -5  -2   30.54    1.68
  11   5   2   32.33    1.69
 -11   5  -2   34.32    1.68
  11   5   2   29.59    1.62
  13  -5   2    3.09    0.26
 -13  -5  -2    2.63    0.27
  13  -5   2    3.01    0.18
 -13  -5  -2    2.79    0.16
 -13   5  -2    2.72    0.15
  13   5   2    2.72    0.19
  13   5   2    2.50    0.27
  13   5   2    2.78    0.15
 -13   5  -2    2.76    0.15
 -13   5  -2    2.56    0.25
 -15  -5  -2    8.62    0.56
  15  -5   2    8.99    0.48
 -15  -5  -2    8.76    0.46
  15  -5   2    9.48    0.56
  15   5   2    8.92    0.48
 -15   5  -2    8.62    0.46
  15   5   2    7.95    0.46
 -15   5  -2    7.63    0.54
  15   5   2    9.18    0.57
 -15   5  -2    8.40    0.45
 -17  -5  -2    0.20    0.13
  17  -5   2    0.21    0.14
 -17  -5  -2    0.23    0.04
  17  -5   2    0.27    0.07
 -17   5  -2    0.21    0.04
  17   5   2    0.14    0.11
  17   5   2    0.13    0.07
 -17   5  -2    0.21    0.03
 -17   5  -2    0.09    0.12
  19  -5   2    2.01    0.27
 -19  -5  -2    1.44    0.23
  19  -5   2    1.71    0.16
 -19  -5  -2    1.79    0.12
  19   5   2    1.86    0.17
 -19   5  -2    1.89    0.11
  19   5   2    1.92    0.28
 -19   5  -2    1.86    0.12
 -19   5  -2    1.71    0.24
 -21  -5  -2    1.94    0.12
  21  -5   2    1.62    0.16
  21  -5   2    1.96    0.27
 -21  -5  -2    1.59    0.24
 -21  -5  -2    1.68    0.12
  21   5   2    1.48    0.24
 -21   5  -2    1.58    0.24
  21   5   2    1.64    0.17
 -21   5  -2    1.78    0.11
 -21   5  -2    1.77    0.12
  23  -5   2    0.05    0.15
 -23  -5  -2   -0.01    0.04
  23  -5   2    0.03    0.07
 -23   5  -2    0.03    0.04
 -23   5  -2    0.00    0.03
 -23   5  -2    0.06    0.15
  25  -5   2    0.09    0.08
 -25  -5  -2    0.06    0.05
 -25   5  -2    0.11    0.03
 -25   5  -2    0.11    0.04
  25   5   2    0.02    0.08
  27  -5   2    2.79    0.22
 -27  -5  -2    2.91    0.17
  27   5   2    2.62    0.22
 -27   5  -2    2.81    0.17
 -29  -5  -2    0.21    0.05
  29  -5   2    0.23    0.09
  29   5   2    0.03    0.09
 -29   5  -2    0.15    0.05
 -31  -5  -2    3.09    0.19
  31  -5   2    2.94    0.24
  31   5   2    3.21    0.24
 -31   5  -2    3.33    0.19
 -33  -5  -2    0.71    0.09
  33  -5   2    0.71    0.11
 -33   5  -2    0.76    0.09
  33   5   2    0.50    0.11
  35  -5   2    0.46    0.11
 -35  -5  -2    0.38    0.07
  35   5   2    0.37    0.10
 -35   5  -2    0.49    0.07
 -37  -5  -2   -0.06    0.06
  37   5   2   -0.02    0.09
 -37   5  -2    0.00    0.06
  39  -5   2    0.31    0.11
  39   5   2    0.45    0.11
 -39   5  -2    0.39    0.08
  40  -6  -2   -0.12    0.10
  40   6  -2    0.09    0.09
  38  -6  -2   -0.07    0.09
  38   6  -2    0.13    0.09
  36  -6  -2    0.64    0.12
 -36   6   2    0.81    0.11
  36   6  -2    0.57    0.11
  34  -6  -2   -0.05    0.09
 -34   6   2    0.02    0.06
  34   6  -2    0.03    0.09
 -32  -6   2    0.49    0.07
  32  -6  -2    0.39    0.10
 -32   6   2    0.55    0.07
  32   6  -2    0.37    0.10
  30  -6  -2    0.42    0.10
 -30  -6   2    0.57    0.08
 -30   6   2    0.55    0.08
 -30   6   2    0.50    0.07
  30   6  -2    0.65    0.10
 -28  -6   2   -0.04    0.05
 -28  -6   2    0.13    0.05
  28  -6  -2    0.16    0.08
 -28   6   2    0.09    0.05
  28   6  -2    0.17    0.08
  26  -6  -2    0.07    0.08
 -26  -6   2    0.11    0.04
 -26  -6   2    0.12    0.06
 -26   6   2    0.09    0.04
 -26   6   2    0.08    0.05
  26   6  -2    0.03    0.07
 -24  -6   2    0.33    0.05
 -24  -6   2    0.28    0.06
  24  -6  -2    0.26    0.15
  24  -6  -2    0.19    0.07
 -24   6   2    0.26    0.05
 -24   6   2    0.25    0.17
  24   6  -2    0.33    0.08
 -24   6   2    0.43    0.06
 -22  -6   2   12.61    0.72
  22  -6  -2   14.28    0.73
 -22  -6   2   12.89    0.86
 -22  -6   2   14.08    0.72
  22   6  -2   12.34    0.82
 -22   6   2   13.74    0.71
 -22   6   2   14.05    0.72
  22   6  -2   13.66    0.74
 -20  -6   2    1.33    0.12
 -20  -6   2    1.37    0.24
 -20  -6   2    1.67    0.11
  20  -6  -2    1.54    0.14
  20  -6  -2    1.93    0.24
  20   6  -2    1.59    0.15
 -20   6   2    1.51    0.23
 -20   6   2    1.67    0.10
  20   6  -2    1.34    0.21
 -20   6   2    1.71    0.11
 -18  -6   2    0.97    0.21
 -18  -6   2    1.44    0.10
  18  -6  -2    1.43    0.13
  18  -6  -2    1.03    0.17
 -18   6   2    0.97    0.19
  18   6  -2    1.46    0.09
  18   6  -2    1.53    0.24
  18   6  -2    1.55    0.14
 -18   6   2    1.59    0.10
 -18   6   2    1.44    0.09
  16  -6  -2    3.76    0.31
 -16  -6   2    4.08    0.23
 -16  -6   2    3.64    0.33
  16  -6  -2    4.05    0.25
 -16   6   2    4.32    0.35
  16   6  -2    4.00    0.25
 -16   6   2    4.19    0.23
  16   6  -2    4.41    0.23
  16   6  -2    4.21    0.34
 -16   6   2    4.21    0.23
 -14  -6   2    1.33    0.21
  14  -6  -2    1.73    0.12
  14  -6  -2    1.56    0.20
 -14  -6   2    1.73    0.11
 -14   6   2    1.70    0.22
 -14   6   2    1.61    0.11
 -14   6   2    1.74    0.10
  14   6  -2    1.75    0.10
  14   6  -2    1.70    0.13
  14   6  -2    1.98    0.22
  12  -6  -2    0.41    0.10
 -12  -6   2    0.25    0.12
 -12  -6   2    0.32    0.05
  12  -6  -2    0.28    0.04
  12   6  -2    0.27    0.05
 -12   6   2    0.31    0.11
 -12   6   2    0.29    0.04
  12   6  -2    0.37    0.11
 -12   6   2    0.39    0.04
 -10  -6   2    3.67    0.31
  10  -6  -2    3.93    0.27
  10  -6  -2    4.10    0.23
 -10  -6   2    4.52    0.23
  10   6  -2    4.22    0.22
 -10   6   2    4.12    0.22
  10   6  -2    4.12    0.23
  10   6  -2    3.42    0.28
  -8  -6   2    4.66    0.24
   8  -6  -2    4.42    0.23
  -8  -6   2    4.23    0.32
   8  -6  -2    4.55    0.27
   8   6  -2    4.17    0.23
  -8   6   2    4.00    0.23
  -8   6   2    4.28    0.23
   8   6  -2    4.15    0.24
  -8   6   2    3.89    0.28
   8   6  -2    4.04    0.28
   6  -6  -2    7.92    0.46
  -6  -6   2    8.70    0.51
   6  -6  -2    8.46    0.45
  -6  -6   2    8.28    0.46
   6   6  -2    8.86    0.45
   6   6  -2    8.59    0.45
  -6   6   2    8.70    0.45
  -6   6   2    8.38    0.48
   6   6  -2    8.77    0.49
  -6   6   2    8.09    0.45
   4  -6  -2    2.70    0.15
   4  -6  -2    2.52    0.17
  -4  -6   2    2.64    0.16
   4  -6  -2    2.64    0.14
  -4  -6   2    2.46    0.20
   4   6  -2    2.49    0.17
   4   6  -2    2.72    0.15
  -4   6   2    2.60    0.14
   4   6  -2    2.50    0.14
  -4   6   2    2.70    0.16
  -2  -6   2    0.14    0.06
  -2  -6   2    0.02    0.05
   2  -6  -2    0.12    0.01
  -2   6   2    0.13    0.02
   2   6  -2    0.21    0.03
   2   6  -2    0.13    0.02
  -2   6   2    0.14    0.03
   2   6  -2    0.14    0.03
   0  -6   2    1.63    0.11
   0  -6   2    1.50    0.12
   0   6  -2    1.53    0.08
   0   6   2    1.62    0.09
   0   6   2    1.69    0.09
   0   6   2    1.65    0.11
   0   6   2    1.49    0.09
  -2  -6  -2   64.51    3.43
   2   6   2   67.05    3.44
   4  -6   2    6.30    0.30
  -4  -6  -2    5.95    0.32
   4  -6   2    5.63    0.33
  -4  -6  -2    6.01    0.34
   4   6   2    5.56    0.35
   4   6   2    5.21    0.30
  -4   6  -2    5.70    0.30
   4   6   2    5.56    0.31
  -4   6  -2    5.30    0.32
   6  -6   2   14.76    0.82
  -6  -6  -2   15.16    0.86
   6  -6   2   13.66    0.84
  -6  -6  -2   15.59    0.82
   6   6   2   16.03    0.81
   6   6   2   16.39    0.87
  -6   6  -2   15.98    0.81
  -6   6  -2   17.22    0.84
   6   6   2   14.61    0.82
  -6   6  -2   16.33    0.82
  -8  -6  -2    1.46    0.19
   8  -6   2    1.77    0.12
  -8  -6  -2    1.86    0.12
   8  -6   2    2.02    0.18
   8   6   2    2.02    0.11
  -8   6  -2    2.04    0.11
   8   6   2    1.79    0.13
  -8   6  -2    1.67    0.16
   8   6   2    1.76    0.19
 -10  -6  -2    2.26    0.14
 -10  -6  -2    2.13    0.22
  10  -6   2    2.09    0.15
  10  -6   2    2.39    0.22
  10   6   2    2.10    0.23
 -10   6  -2    2.57    0.13
 -10   6  -2    2.32    0.13
  10   6   2    2.19    0.16
 -10   6  -2    2.17    0.20
  12  -6   2    0.07    0.15
  12  -6   2    0.14    0.05
 -12  -6  -2    0.09    0.04
 -12  -6  -2    0.12    0.11
 -12   6  -2    0.22    0.03
  12   6   2    0.17    0.02
  12   6   2    0.07    0.06
 -12   6  -2    0.17    0.04
  12   6   2    0.07    0.12
 -12   6  -2    0.08    0.09
  14  -6   2   35.06    1.75
  14  -6   2   30.87    1.67
 -14  -6  -2   30.14    1.74
 -14  -6  -2   30.17    1.66
  14   6   2   33.83    1.68
 -14   6  -2   32.43    1.74
  14   6   2   32.55    1.75
 -14   6  -2   29.80    1.66
  16  -6   2    2.56    0.18
  16  -6   2    3.21    0.29
 -16  -6  -2    2.13    0.28
 -16  -6  -2    2.60    0.16
  16   6   2    2.60    0.15
 -16   6  -2    2.64    0.15
 -16   6  -2    2.66    0.26
  16   6   2    2.43    0.19
 -16   6  -2    2.63    0.15
  16   6   2    2.73    0.29
 -18  -6  -2    2.14    0.14
  18  -6   2    2.42    0.29
 -18  -6  -2    1.82    0.28
  18  -6   2    2.47    0.18
  18   6   2    1.90    0.18
 -18   6  -2    2.41    0.13
 -18   6  -2    2.17    0.28
 -18   6  -2    2.30    0.13
  18   6   2    2.45    0.13
  18   6   2    2.19    0.29
  20  -6   2    0.20    0.15
  20  -6   2    0.23    0.07
 -20  -6  -2    0.30    0.05
 -20  -6  -2    0.18    0.15
 -20  -6  -2    0.23    0.05
 -20   6  -2    0.37    0.05
 -20   6  -2    0.28    0.04
  20   6   2    0.07    0.15
 -20   6  -2    0.29    0.14
  20   6   2    0.25    0.08
  22  -6   2   -0.08    0.07
 -22  -6  -2    0.04    0.15
  22  -6   2   -0.10    0.14
 -22  -6  -2    0.03    0.04
 -22  -6  -2   -0.02    0.04
  22   6   2   -0.07    0.07
 -22   6  -2   -0.04    0.13
 -22   6  -2    0.01    0.04
 -22   6  -2    0.03    0.03
 -24  -6  -2    0.09    0.05
  24  -6   2    0.00    0.07
  24   6   2   -0.05    0.08
 -24   6  -2    0.01    0.16
 -24   6  -2    0.09    0.05
 -26  -6  -2    2.28    0.14
  26  -6   2    2.19    0.20
  26   6   2    2.00    0.20
 -26   6  -2    2.24    0.14
 -28  -6  -2    0.63    0.08
  28  -6   2    0.64    0.11
 -28   6  -2    0.52    0.08
  28   6   2    0.40    0.10
 -30  -6  -2    3.03    0.19
  30  -6   2    3.30    0.25
 -30   6  -2    3.31    0.19
  30   6   2    3.26    0.24
  32  -6   2    0.53    0.11
 -32  -6  -2    0.67    0.08
 -32   6  -2    0.71    0.09
  32   6   2    0.50    0.11
 -34  -6  -2    0.39    0.07
  34  -6   2    0.31    0.10
 -34   6  -2    0.41    0.07
  34   6   2    0.30    0.10
 -36  -6  -2    0.09    0.06
  36  -6   2    0.08    0.11
 -36   6  -2    0.15    0.06
  38  -6   2    0.32    0.11
  38   6   2    0.41    0.11
 -38   6  -2    0.37    0.07
  40  -6   2   -0.01    0.10
 -40   6  -2    0.05    0.07
  40   6   2   -0.07    0.10
  39   7  -2   -0.09    0.09
  37   7  -2    0.59    0.11
  35  -7  -2   -0.04    0.09
  35   7  -2    0.04    0.09
 -35   7   2    0.00    0.06
  33  -7  -2   -0.11    0.08
  33   7  -2   -0.05    0.08
 -33   7   2   -0.02    0.06
 -31  -7   2    0.17    0.05
  31  -7  -2    0.03    0.09
  31   7  -2    0.06    0.09
 -31   7   2    0.13    0.06
 -29  -7   2    0.08    0.05
  29  -7  -2    0.14    0.08
  29   7  -2    0.14    0.08
 -29   7   2    0.05    0.05
 -29   7   2    0.04    0.04
 -27  -7   2    1.02    0.09
 -27  -7   2    1.01    0.11
  27  -7  -2    1.16    0.15
  27   7  -2    1.07    0.15
 -27   7   2    0.87    0.09
 -27   7   2    0.95    0.09
 -25  -7   2    0.26    0.06
 -25  -7   2    0.20    0.05
 -25   7   2    0.19    0.04
 -25   7   2    0.23    0.05
  25   7  -2    0.18    0.08
 -23  -7   2    1.16    0.10
  23  -7  -2    1.47    0.15
  23  -7  -2    0.75    0.18
 -23  -7   2    1.50    0.11
 -23   7   2    1.30    0.09
  23   7  -2    1.30    0.14
 -23   7   2    1.08    0.21
 -23   7   2    1.22    0.09
  21  -7  -2    5.86    0.34
  21  -7  -2    5.89    0.42
 -21  -7   2    5.67    0.31
 -21  -7   2    5.08    0.46
 -21   7   2    5.72    0.31
  21   7  -2    5.87    0.44
 -21   7   2    5.08    0.45
 -21   7   2    5.80    0.31
  21   7  -2    6.06    0.34
  19  -7  -2    1.28    0.19
  19  -7  -2    1.49    0.13
 -19  -7   2    1.43    0.11
 -19  -7   2    1.16    0.22
  19   7  -2    1.57    0.10
  19   7  -2    1.75    0.24
 -19   7   2    1.43    0.09
  19   7  -2    1.64    0.14
 -19   7   2    1.40    0.10
 -19   7   2    1.91    0.27
  17  -7  -2    6.61    0.45
 -17  -7   2    6.76    0.36
 -17  -7   2    5.89    0.48
  17  -7  -2    6.81    0.37
 -17   7   2    7.19    0.36
  17   7  -2    6.24    0.46
 -17   7   2    6.46    0.36
  17   7  -2    6.25    0.38
  17   7  -2    6.94    0.36
 -15  -7   2    8.25    0.58
 -15  -7   2    9.26    0.48
  15  -7  -2    9.45    0.49
  15  -7  -2    9.73    0.55
  15   7  -2    9.35    0.47
 -15   7   2    8.46    0.47
  15   7  -2    8.07    0.56
  15   7  -2    8.62    0.49
 -15   7   2    9.12    0.57
 -15   7   2    8.74    0.47
 -13  -7   2    0.30    0.14
  13  -7  -2    0.35    0.05
  13  -7  -2    0.36    0.10
 -13  -7   2    0.35    0.05
 -13   7   2    0.29    0.11
  13   7  -2    0.40    0.05
 -13   7   2    0.33    0.04
 -13   7   2    0.35    0.04
  13   7  -2    0.37    0.11
  13   7  -2    0.27    0.06
 -11  -7   2    9.02    0.58
  11  -7  -2    8.19    0.53
  11  -7  -2    9.32    0.49
 -11   7   2    8.69    0.49
  11   7  -2    9.98    0.55
 -11   7   2   10.50    0.56
 -11   7   2    9.11    0.49
  11   7  -2    9.84    0.50
  11   7  -2    8.64    0.49
  -9  -7   2    0.24    0.05
  -9  -7   2    0.24    0.12
   9  -7  -2    0.29    0.07
   9  -7  -2    0.22    0.03
   9   7  -2    0.32    0.04
   9   7  -2    0.20    0.05
  -9   7   2    0.23    0.04
   9   7  -2    0.07    0.09
  -9   7   2    0.22    0.08
  -9   7   2    0.25    0.03
   7  -7  -2    9.24    0.49
   7  -7  -2    9.00    0.48
  -7  -7   2   10.16    0.55
  -7  -7   2    8.56    0.49
  -7   7   2    9.09    0.48
   7   7  -2    9.30    0.52
  -7   7   2    8.81    0.51
   7   7  -2    8.45    0.47
   7   7  -2    9.00    0.48
   5  -7  -2   15.17    0.78
  -5  -7   2   12.93    0.76
   5  -7  -2   13.92    0.75
  -5  -7   2   14.92    0.80
   5  -7  -2   13.96    0.74
   5   7  -2   13.76    0.75
  -5   7   2   14.46    0.75
   5   7  -2   14.50    0.77
  -5   7   2   14.97    0.76
   5   7  -2   14.30    0.75
   3  -7  -2   20.89    1.10
  -3  -7   2   20.57    1.10
  -3  -7   2   21.80    1.12
   3   7  -2   20.33    1.08
   3   7  -2   20.10    1.09
  -1  -7   2    5.51    0.31
  -1  -7   2    4.35    0.30
  -1   7   2    5.42    0.28
   1   7  -2    5.54    0.29
   1   7  -2    5.55    0.28
   1   7  -2    5.29    0.28
   1  -7   2    1.21    0.12
  -1  -7  -2    1.34    0.12
  -1  -7  -2    1.55    0.10
   1  -7   2    1.27    0.09
   1  -7   2    1.47    0.09
  -1   7  -2    1.32    0.08
  -1   7  -2    1.49    0.07
   1   7   2    1.32    0.08
   1   7   2    1.44    0.11
   1   7   2    1.26    0.08
  -3  -7  -2   67.08    3.12
   3  -7   2   57.70    3.10
   3   7   2   53.50    3.11
   5  -7   2   23.56    1.21
   5  -7   2   24.49    1.23
  -5  -7  -2   20.95    1.22
  -5  -7  -2   23.51    1.25
   5   7   2   23.76    1.25
  -5   7  -2   22.75    1.22
   5   7   2   23.15    1.21
  -7  -7  -2   22.36    1.23
  -7  -7  -2   23.05    1.18
   7  -7   2   24.34    1.18
   7  -7   2   22.54    1.21
   7   7   2   21.61    1.18
  -7   7  -2   22.03    1.17
  -7   7  -2   20.55    1.20
   7   7   2   23.37    1.23
   9  -7   2   23.27    1.30
  -9  -7  -2   25.64    1.30
  -9  -7  -2   23.57    1.35
   9  -7   2   22.86    1.33
   9   7   2   27.53    1.37
  -9   7  -2   22.80    1.33
   9   7   2   27.47    1.31
 -11  -7  -2   15.36    0.82
  11  -7   2   15.01    0.88
 -11  -7  -2   14.68    0.89
 -11   7  -2   17.96    0.88
 -11   7  -2   14.98    0.81
 -11   7  -2   15.73    0.81
  11   7   2   15.60    0.90
  11   7   2   14.91    0.81
  13  -7   2    5.06    0.40
 -13  -7  -2    5.76    0.31
  13  -7   2    5.93    0.33
 -13   7  -2    5.85    0.31
 -13   7  -2    5.93    0.31
  13   7   2    5.78    0.31
  13   7   2    5.78    0.43
  13   7   2    5.50    0.33
  15  -7   2   10.24    0.59
 -15  -7  -2    9.93    0.67
 -15  -7  -2   11.41    0.58
 -15   7  -2   11.29    0.57
  15   7   2   10.40    0.67
 -15   7  -2   10.63    0.57
  15   7   2   10.59    0.57
  15   7   2   11.18    0.59
 -17  -7  -2   13.08    0.81
  17  -7   2   12.52    0.79
  17  -7   2   12.62    0.71
 -17  -7  -2   13.09    0.70
  17   7   2   13.78    0.81
 -17   7  -2   12.62    0.69
  17   7   2   12.67    0.69
  17   7   2   13.22    0.72
 -17   7  -2   13.69    0.70
 -17   7  -2   14.52    0.80
 -19  -7  -2    3.89    0.23
  19  -7   2    4.38    0.37
  19  -7   2    3.69    0.25
 -19  -7  -2    3.83    0.37
  19   7   2    4.61    0.37
 -19   7  -2    4.33    0.22
 -19   7  -2    3.85    0.23
 -19   7  -2    4.10    0.37
  19   7   2    3.96    0.22
  19   7   2    3.79    0.26
 -21  -7  -2    0.50    0.06
 -21  -7  -2    0.24    0.17
  21  -7   2    0.45    0.08
  21  -7   2    0.70    0.18
  21   7   2    0.47    0.17
 -21   7  -2    0.48    0.06
 -21   7  -2    0.52    0.17
 -21   7  -2    0.48    0.06
  21   7   2    0.39    0.09
  23  -7   2    0.93    0.12
 -23  -7  -2    1.15    0.09
  23  -7   2    1.00    0.23
 -23   7  -2    1.25    0.08
 -23   7  -2    1.03    0.09
 -23   7  -2    0.81    0.20
  25  -7   2    0.10    0.09
 -25  -7  -2    0.10    0.05
 -25   7  -2    0.07    0.05
  25   7   2    0.04    0.09
 -25   7  -2    0.15    0.04
 -27  -7  -2    1.06    0.10
  27  -7   2    1.17    0.16
 -27   7  -2    1.06    0.10
  27   7   2    1.22    0.16
  29  -7   2    1.68    0.18
 -29  -7  -2    1.70    0.12
 -29   7  -2    1.74    0.12
  29   7   2    1.61    0.18
  31  -7   2    1.49    0.18
 -31  -7  -2    1.43    0.12
  31   7   2    1.61    0.18
 -31   7  -2    1.55    0.12
 -33  -7  -2    0.14    0.06
  33  -7   2    0.02    0.10
  33   7   2    0.12    0.09
 -33   7  -2    0.09    0.05
 -35  -7  -2    0.39    0.07
  35  -7   2    0.55    0.12
  35   7   2    0.34    0.10
 -35   7  -2    0.50    0.07
  37  -7   2    0.13    0.10
 -37  -7  -2    0.12    0.06
  37   7   2    0.14    0.10
  39  -7   2    0.08    0.11
 -39   7  -2    0.19    0.07
  39   7   2    0.11    0.10
  38  -8  -2   -0.02    0.10
  38   8  -2    0.23    0.10
  36  -8  -2   -0.04    0.10
 -36   8   2    0.01    0.07
  36   8  -2    0.10    0.09
  34  -8  -2    0.36    0.10
 -34   8   2    0.45    0.07
  34   8  -2    0.38    0.10
  32  -8  -2    0.25    0.09
 -32  -8   2    0.52    0.07
 -32   8   2    0.57    0.07
  32   8  -2    0.28    0.10
 -30  -8   2    0.00    0.05
  30  -8  -2   -0.06    0.08
  30   8  -2    0.03    0.08
 -30   8   2    0.06    0.04
 -30   8   2   -0.03    0.05
 -28  -8   2    0.16    0.06
  28  -8  -2    0.16    0.08
 -28  -8   2    0.15    0.07
  28   8  -2    0.18    0.08
 -28   8   2    0.17    0.05
 -28   8   2    0.13    0.05
 -26  -8   2    0.76    0.09
 -26  -8   2    0.84    0.10
  26  -8  -2    0.64    0.10
 -26   8   2    0.63    0.08
  26   8  -2    0.55    0.10
 -26   8   2    0.68    0.08
 -24  -8   2    0.78    0.10
  24  -8  -2    0.51    0.09
 -24  -8   2    0.69    0.08
  24  -8  -2    0.49    0.18
 -24   8   2    0.56    0.20
  24   8  -2    0.51    0.09
 -24   8   2    0.59    0.07
  22  -8  -2    5.01    0.39
  22  -8  -2    4.90    0.29
 -22  -8   2    5.00    0.27
 -22  -8   2    4.37    0.44
 -22   8   2    4.88    0.27
 -22   8   2    4.80    0.27
 -22   8   2    4.64    0.41
  22   8  -2    4.74    0.30
 -20  -8   2    6.19    0.50
 -20  -8   2    6.59    0.35
  20  -8  -2    5.79    0.45
  20  -8  -2    6.55    0.37
  20   8  -2    6.39    0.34
 -20   8   2    6.09    0.47
 -20   8   2    6.54    0.35
  20   8  -2    6.70    0.37
 -20   8   2    6.18    0.35
  20   8  -2    6.47    0.46
  18  -8  -2    6.53    0.37
 -18  -8   2    6.45    0.36
 -18  -8   2    6.35    0.49
  18  -8  -2    6.86    0.45
 -18   8   2    7.38    0.49
  18   8  -2    6.75    0.46
  18   8  -2    6.96    0.37
  18   8  -2    6.79    0.35
 -18   8   2    5.94    0.35
 -18   8   2    5.92    0.35
  16  -8  -2    8.82    0.46
 -16  -8   2    8.64    0.46
  16  -8  -2    7.59    0.55
 -16  -8   2    8.26    0.57
  16   8  -2    8.37    0.47
  16   8  -2    8.89    0.45
  16   8  -2    9.07    0.55
 -16   8   2    8.21    0.45
 -16   8   2    8.16    0.45
  14  -8  -2    0.03    0.08
 -14  -8   2   -0.13    0.11
 -14  -8   2   -0.08    0.04
  14  -8  -2   -0.01    0.04
  14   8  -2   -0.01    0.09
 -14   8   2   -0.04    0.03
  14   8  -2    0.01    0.03
 -14   8   2    0.00    0.02
  14   8  -2   -0.02    0.04
 -12  -8   2   13.20    0.79
  12  -8  -2   14.09    0.74
 -12  -8   2   13.11    0.70
  12   8  -2   14.69    0.77
  12   8  -2   13.77    0.70
  12   8  -2   12.56    0.69
 -12   8   2   12.74    0.75
 -12   8   2   12.00    0.69
 -12   8   2   11.92    0.69
 -10  -8   2    4.04    0.35
  10  -8  -2    4.58    0.29
 -10  -8   2    4.73    0.26
  10  -8  -2    4.42    0.25
 -10   8   2    4.51    0.25
  10   8  -2    4.49    0.24
  10   8  -2    4.60    0.26
 -10   8   2    4.70    0.25
  10   8  -2    4.41    0.32
  -8  -8   2    0.24    0.06
   8  -8  -2    0.22    0.03
  -8  -8   2    0.30    0.12
   8  -8  -2    0.32    0.06
   8   8  -2    0.24    0.03
  -8   8   2    0.15    0.07
   8   8  -2    0.15    0.04
   8   8  -2    0.24    0.09
  -8   8   2    0.19    0.03
   6  -8  -2    0.14    0.01
   6  -8  -2    0.17    0.03
  -6  -8   2    0.04    0.08
  -6  -8   2    0.07    0.06
   6  -8  -2    0.06    0.08
   6   8  -2    0.11    0.06
  -6   8   2    0.09    0.04
  -6   8   2    0.09    0.03
   6   8  -2    0.10    0.03
   6   8  -2    0.11    0.02
   4  -8  -2   29.46    1.66
  -4  -8   2   29.87    1.68
  -4  -8   2   33.37    1.66
   4   8  -2   33.40    1.66
   2  -8  -2   98.18    7.30
  -2  -8   2  116.91    6.96
  -2  -8   2   91.48    6.48
   2  -8  -2  105.43    7.29
   2   8  -2  111.74    6.85
   2   8  -2   90.18    6.71
  -2   8   2   90.83    6.80
   0  -8  -2   21.98    1.32
   0  -8   2   28.66    1.31
   0  -8   2   22.89    1.31
   0  -8   2   27.28    1.34
   0   8  -2   24.06    1.30
  -2  -8  -2    0.14    0.05
   2  -8   2    0.19    0.02
   2  -8   2    0.20    0.09
   2  -8   2    0.31    0.04
  -2  -8  -2    0.18    0.05
   2  -8   2    0.15    0.03
   2   8   2    0.25    0.04
  -2   8  -2    0.22    0.03
   2   8   2    0.20    0.03
   2   8   2    0.19    0.06
  -4  -8  -2   61.72    3.59
   4   8   2   75.35    3.60
  -6  -8  -2    1.78    0.17
   6  -8   2    1.36    0.13
   6  -8   2    1.50    0.10
  -6  -8  -2    1.80    0.13
   6   8   2    1.57    0.17
  -6   8  -2    1.54    0.09
   6   8   2    1.45    0.11
  -6   8  -2    1.27    0.12
   6   8   2    1.57    0.09
  -8  -8  -2   21.78    1.14
   8  -8   2   19.13    1.17
  -8  -8  -2   23.52    1.26
   8  -8   2   20.10    1.13
  -8   8  -2   20.23    1.13
  -8   8  -2   24.61    1.17
  -8   8  -2   21.54    1.13
   8   8   2   22.50    1.20
  10  -8   2   46.78    2.30
 -10  -8  -2   41.19    2.25
  10  -8   2   43.19    2.25
 -10   8  -2   39.85    2.28
  10   8   2   42.81    2.31
  10   8   2   44.59    2.26
  12  -8   2    2.30    0.23
 -12  -8  -2    2.76    0.26
 -12  -8  -2    2.35    0.15
  12  -8   2    2.89    0.17
 -12   8  -2    2.43    0.14
 -12   8  -2    2.75    0.15
  12   8   2    2.33    0.17
  12   8   2    2.51    0.14
 -12   8  -2    2.20    0.22
 -14  -8  -2    2.03    0.25
 -14  -8  -2    1.82    0.12
  14  -8   2    1.59    0.23
 -14   8  -2    1.96    0.22
  14   8   2    1.85    0.11
 -14   8  -2    1.50    0.11
  14   8   2    2.01    0.16
  14   8   2    1.73    0.24
 -14   8  -2    1.97    0.11
  16  -8   2    8.15    0.54
 -16  -8  -2    8.19    0.45
 -16  -8  -2    7.12    0.55
  16  -8   2    8.22    0.46
  16   8   2    8.38    0.55
  16   8   2    8.39    0.44
 -16   8  -2    8.74    0.44
  16   8   2    8.06    0.46
 -16   8  -2    8.43    0.44
 -18  -8  -2    6.13    0.35
  18  -8   2    6.70    0.46
 -18  -8  -2    5.96    0.47
  18  -8   2    6.67    0.37
 -18   8  -2    6.37    0.46
 -18   8  -2    5.92    0.34
  18   8   2    6.05    0.46
 -18   8  -2    6.28    0.34
  18   8   2    6.24    0.34
  18   8   2    6.86    0.38
 -20  -8  -2    0.65    0.08
 -20  -8  -2    0.78    0.19
  20  -8   2    1.02    0.19
  20  -8   2    0.62    0.09
  20   8   2    0.77    0.18
  20   8   2    0.59    0.10
 -20   8  -2    0.70    0.18
 -20   8  -2    0.67    0.06
  20   8   2    0.75    0.07
 -20   8  -2    0.64    0.07
  22  -8   2    0.41    0.09
  22  -8   2    0.68    0.18
 -22  -8  -2    0.40    0.06
 -22   8  -2    0.38    0.05
 -22   8  -2    0.43    0.05
 -22   8  -2    0.34    0.17
  24  -8   2    0.34    0.22
 -24  -8  -2    0.13    0.05
  24  -8   2    0.20    0.08
 -24   8  -2    0.14    0.05
 -24   8  -2    0.25    0.16
  24   8   2    0.09    0.09
 -24   8  -2    0.22    0.04
 -26  -8  -2   -0.01    0.04
  26  -8   2    0.08    0.09
 -26   8  -2    0.05    0.04
  26   8   2    0.08    0.08
 -26   8  -2   -0.03    0.05
 -28  -8  -2    0.90    0.09
  28  -8   2    0.91    0.12
 -28   8  -2    0.87    0.09
  28   8   2    0.83    0.12
 -30  -8  -2    1.72    0.13
  30  -8   2    1.69    0.19
 -30   8  -2    1.78    0.13
  30   8   2    1.72    0.18
  32  -8   2    0.02    0.09
 -32  -8  -2    0.01    0.05
 -32   8  -2    0.00    0.06
  32   8   2    0.02    0.09
 -34  -8  -2    0.25    0.06
  34  -8   2    0.23    0.10
 -34   8  -2    0.22    0.06
  34   8   2    0.31    0.10
 -36  -8  -2    0.95    0.10
  36  -8   2    0.95    0.14
  36   8   2    0.77    0.13
 -36   8  -2    1.23    0.11
  38  -8   2    0.41    0.12
  38   8   2    0.46    0.11
 -38   8  -2    0.59    0.08
  39  -9  -2    0.40    0.12
  39   9  -2    0.59    0.11
  37  -9  -2    0.84    0.13
  35  -9  -2   -0.13    0.09
 -35   9   2    0.12    0.07
  33  -9  -2   -0.20    0.08
  33   9  -2    0.08    0.09
 -33   9   2    0.04    0.06
 -31  -9   2    0.45    0.07
  31  -9  -2    0.32    0.10
 -31   9   2    0.60    0.09
  31   9  -2    0.35    0.10
  29  -9  -2   -0.01    0.08
 -29  -9   2    0.08    0.05
 -29   9   2    0.10    0.05
 -29   9   2    0.14    0.06
  29   9  -2    0.12    0.08
 -27  -9   2    1.83    0.14
 -27  -9   2    2.26    0.16
  27  -9  -2    1.80    0.18
  27   9  -2    2.17    0.18
 -27   9   2    1.88    0.13
 -27   9   2    1.93    0.13
 -25  -9   2    0.49    0.07
  25  -9  -2    0.36    0.10
 -25  -9   2    0.75    0.10
 -25   9   2    0.50    0.07
  25   9  -2    0.37    0.09
 -25   9   2    0.56    0.07
  23  -9  -2    3.11    0.34
  23  -9  -2    3.43    0.23
 -23  -9   2    3.54    0.20
 -23   9   2    3.08    0.38
 -23   9   2    3.63    0.20
  23   9  -2    3.59    0.24
 -23   9   2    3.34    0.20
 -21  -9   2    1.70    0.28
  21  -9  -2    2.14    0.28
 -21  -9   2    2.43    0.15
  21  -9  -2    2.28    0.17
  21   9  -2    2.36    0.18
 -21   9   2    2.44    0.15
  21   9  -2    2.44    0.14
 -21   9   2    2.00    0.30
 -21   9   2    2.29    0.14
 -19  -9   2    4.66    0.26
  19  -9  -2    5.11    0.28
  19  -9  -2    4.14    0.36
 -19  -9   2    4.82    0.42
  19   9  -2    4.56    0.25
 -19   9   2    4.51    0.39
  19   9  -2    4.80    0.38
 -19   9   2    4.66    0.26
 -19   9   2    4.25    0.26
  19   9  -2    4.56    0.28
  17  -9  -2    2.32    0.16
  17  -9  -2    2.11    0.24
 -17  -9   2    1.94    0.27
 -17  -9   2    2.34    0.15
  17   9  -2    2.19    0.26
  17   9  -2    2.07    0.17
 -17   9   2    2.23    0.14
 -17   9   2    2.36    0.14
  17   9  -2    2.43    0.14
 -15  -9   2    0.19    0.14
 -15  -9   2    0.16    0.05
  15  -9  -2    0.12    0.10
  15   9  -2    0.19    0.04
 -15   9   2    0.21    0.05
 -15   9   2    0.19    0.03
  15   9  -2    0.18    0.12
  15   9  -2    0.20    0.06
 -15   9   2    0.27    0.12
  13  -9  -2    0.03    0.08
  13  -9  -2    0.18    0.04
 -13  -9   2    0.06    0.12
 -13  -9   2    0.09    0.05
 -13   9   2    0.04    0.09
 -13   9   2    0.12    0.03
  13   9  -2    0.16    0.03
  13   9  -2    0.16    0.05
 -13   9   2    0.14    0.03
  13   9  -2    0.15    0.11
  11  -9  -2    6.74    0.37
  11  -9  -2    6.52    0.33
 -11  -9   2    5.92    0.34
 -11  -9   2    5.86    0.43
  11   9  -2    6.09    0.33
 -11   9   2    5.78    0.39
 -11   9   2    5.99    0.33
  11   9  -2    6.19    0.41
 -11   9   2    6.34    0.33
  11   9  -2    6.29    0.34
   9  -9  -2    0.40    0.06
  -9  -9   2    0.35    0.06
   9  -9  -2    0.31    0.03
  -9  -9   2    0.32    0.12
   9   9  -2    0.45    0.05
   9   9  -2    0.23    0.09
  -9   9   2    0.31    0.08
  -9   9   2    0.30    0.04
   9   9  -2    0.26    0.05
   7  -9  -2    0.38    0.10
   7  -9  -2    0.43    0.05
  -7  -9   2    0.36    0.07
  -7  -9   2    0.29    0.11
   7  -9  -2    0.31    0.03
   7   9  -2    0.35    0.04
  -7   9   2    0.40    0.06
   7   9  -2    0.41    0.08
   7   9  -2    0.49    0.04
  -7   9   2    0.52    0.05
   5  -9  -2   12.49    0.66
  -5  -9   2   12.76    0.68
  -5  -9   2   11.50    0.65
   5   9  -2   11.77    0.63
  -5   9   2   11.18    0.63
   5   9  -2   12.02    0.63
   5   9  -2   12.42    0.66
  -3  -9   2   11.82    0.62
   3  -9  -2   11.70    0.64
  -3  -9   2   11.66    0.64
  -3   9   2   11.27    0.60
   3   9  -2   11.72    0.61
   3   9  -2   11.98    0.60
   3   9  -2   10.27    0.60
  -1  -9   2    7.11    0.41
  -1  -9   2    8.01    0.40
   1  -9  -2    7.04    0.41
  -1   9   2    6.98    0.38
   1   9  -2    7.14    0.38
   1   9  -2    7.15    0.38
  -1  -9  -2   10.58    0.57
   1  -9   2   10.48    0.58
  -1   9  -2    9.97    0.55
   1   9   2   10.22    0.55
   1   9   2   10.96    0.55
   3  -9   2    2.44    0.21
  -3  -9  -2    2.48    0.18
  -3  -9  -2    2.43    0.18
   3   9   2    2.55    0.18
   3   9   2    2.83    0.15
  -3   9  -2    2.87    0.15
   3   9   2    2.58    0.15
  -5  -9  -2   45.39    2.57
   5  -9   2   49.56    2.55
  -5  -9  -2   47.92    2.55
   5   9   2   46.48    2.55
   5   9   2   54.96    2.58
  -7  -9  -2   17.38    0.91
  -7  -9  -2   15.81    0.94
   7  -9   2   19.03    0.89
   7  -9   2   19.41    0.92
   7   9   2   15.64    0.89
  -7   9  -2   16.21    0.89
  -7   9  -2   15.31    0.89
   7   9   2   16.96    0.90
   7   9   2   17.39    0.95
  -9  -9  -2    0.57    0.09
  -9  -9  -2    0.62    0.13
   9  -9   2    0.78    0.07
   9  -9   2    0.73    0.11
   9   9   2    0.76    0.05
  -9   9  -2    0.84    0.07
   9   9   2    0.66    0.09
  -9   9  -2    0.84    0.06
  -9   9  -2    0.67    0.10
   9   9   2    0.67    0.13
 -11  -9  -2   23.92    1.27
 -11  -9  -2   22.84    1.19
  11  -9   2   19.99    1.23
  11  -9   2   22.46    1.19
 -11   9  -2   22.45    1.18
  11   9   2   22.26    1.19
 -11   9  -2   23.01    1.18
  11   9   2   21.14    1.18
  11   9   2   25.61    1.27
 -13  -9  -2    0.07    0.12
 -13  -9  -2   -0.04    0.05
  13  -9   2    0.17    0.11
  13  -9   2    0.06    0.05
 -13   9  -2    0.08    0.03
 -13   9  -2    0.10    0.10
  13   9   2   -0.04    0.06
 -13   9  -2    0.05    0.03
  13   9   2    0.08    0.12
  13   9   2    0.10    0.03
 -15  -9  -2    1.24    0.10
  15  -9   2    1.50    0.12
 -15  -9  -2    1.36    0.22
  15  -9   2    1.09    0.18
 -15   9  -2    1.38    0.10
 -15   9  -2    1.32    0.09
  15   9   2    1.13    0.13
  15   9   2    1.45    0.20
  15   9   2    1.34    0.09
 -15   9  -2    1.43    0.21
 -17  -9  -2   14.35    0.90
  17  -9   2   15.13    0.80
 -17  -9  -2   14.97    0.79
  17  -9   2   15.75    0.89
 -17   9  -2   14.84    0.78
  17   9   2   14.75    0.89
  17   9   2   13.89    0.80
  17   9   2   14.51    0.78
 -17   9  -2   15.16    0.87
 -17   9  -2   14.40    0.78
  19  -9   2    1.70    0.15
 -19  -9  -2    1.78    0.13
 -19  -9  -2    1.46    0.24
  19  -9   2    1.89    0.28
  19   9   2    1.94    0.28
 -19   9  -2    1.73    0.12
 -19   9  -2    1.65    0.11
 -19   9  -2    1.42    0.21
  19   9   2    1.67    0.16
  19   9   2    1.77    0.11
  21  -9   2    1.56    0.23
  21  -9   2    1.37    0.14
 -21  -9  -2    0.74    0.21
 -21  -9  -2    1.04    0.10
 -21   9  -2    1.02    0.09
 -21   9  -2    1.11    0.21
 -21   9  -2    1.13    0.08
  21   9   2    1.10    0.08
  21   9   2    0.89    0.12
  23  -9   2    0.08    0.08
  23  -9   2    0.15    0.17
 -23  -9  -2   -0.01    0.05
 -23   9  -2    0.30    0.16
 -23   9  -2    0.13    0.04
  23   9   2    0.03    0.08
 -23   9  -2    0.06    0.05
 -25  -9  -2    0.45    0.07
  25  -9   2    0.51    0.10
 -25   9  -2    0.44    0.06
  25   9   2    0.39    0.10
 -25   9  -2    0.59    0.07
 -27  -9  -2    0.80    0.09
  27  -9   2    0.82    0.12
 -27   9  -2    0.95    0.09
 -27   9  -2    1.03    0.09
  27   9   2    0.71    0.11
  29  -9   2    0.82    0.13
 -29  -9  -2    1.02    0.11
  29   9   2    0.97    0.13
 -29   9  -2    1.10    0.10
 -31  -9  -2    0.35    0.06
  31  -9   2    0.36    0.11
  31   9   2    0.34    0.10
 -31   9  -2    0.28    0.06
 -33  -9  -2    0.14    0.06
  33  -9   2    0.13    0.09
 -33   9  -2    0.04    0.06
  33   9   2    0.04    0.09
  35   9   2    2.71    0.22
  37  -9   2    0.29    0.12
  37   9   2    0.44    0.11
 -37   9  -2    0.57    0.08
  38  10  -2    1.05    0.13
  36 -10  -2   -0.24    0.11
  36  10  -2   -0.04    0.09
 -34  10   2    1.06    0.12
  34  10  -2    0.81    0.12
  32 -10  -2   -0.07    0.09
 -32  10   2    0.18    0.07
  32  10  -2    0.25    0.09
 -30 -10   2    0.64    0.09
 -30  10   2    0.63    0.10
  30  10  -2    0.49    0.10
 -30  10   2    0.71    0.08
 -28 -10   2    0.14    0.05
  28 -10  -2   -0.08    0.08
 -28  10   2    0.04    0.05
  28  10  -2   -0.02    0.08
 -28  10   2    0.06    0.05
  26 -10  -2    0.52    0.09
 -26 -10   2    0.56    0.08
 -26 -10   2    0.71    0.15
 -26  10   2    0.67    0.08
  26  10  -2    0.45    0.09
 -26  10   2    0.71    0.08
  24 -10  -2    2.06    0.18
 -24 -10   2    2.17    0.16
  24  10  -2    2.46    0.20
 -24  10   2    2.35    0.15
 -24  10   2    2.25    0.14
 -22 -10   2    1.19    0.10
  22 -10  -2    0.80    0.10
  22 -10  -2    0.90    0.20
 -22  10   2    1.08    0.23
  22  10  -2    1.22    0.09
 -22  10   2    1.22    0.10
  22  10  -2    1.11    0.14
 -22  10   2    1.24    0.09
  20 -10  -2    0.71    0.16
 -20 -10   2    0.60    0.08
 -20 -10   2    0.47    0.18
  20 -10  -2    0.60    0.08
  20  10  -2    0.75    0.07
 -20  10   2    0.65    0.08
 -20  10   2    0.42    0.18
  20  10  -2    0.50    0.17
 -20  10   2    0.70    0.06
  20  10  -2    0.70    0.09
 -18 -10   2    0.69    0.09
  18 -10  -2    0.66    0.08
  18 -10  -2    0.60    0.15
 -18 -10   2    0.70    0.20
  18  10  -2    0.58    0.16
 -18  10   2    0.71    0.06
 -18  10   2    0.69    0.08
  18  10  -2    0.84    0.07
  18  10  -2    0.54    0.08
 -18  10   2    0.44    0.16
 -16 -10   2    0.90    0.10
  16 -10  -2    0.75    0.14
 -16 -10   2    0.78    0.20
  16 -10  -2    1.01    0.10
 -16  10   2    1.08    0.09
  16  10  -2    1.01    0.18
  16  10  -2    0.99    0.11
 -16  10   2    1.18    0.08
  16  10  -2    0.93    0.08
 -16  10   2    0.96    0.17
  14 -10  -2    0.13    0.04
 -14 -10   2    0.08    0.15
 -14 -10   2    0.13    0.06
  14 -10  -2    0.08    0.09
 -14  10   2    0.21    0.04
  14  10  -2    0.17    0.05
 -14  10   2    0.27    0.11
  14  10  -2    0.14    0.04
  14  10  -2    0.10    0.12
 -14  10   2    0.22    0.03
  12 -10  -2    5.33    0.27
 -12 -10   2    4.88    0.28
 -12 -10   2    5.61    0.39
  12 -10  -2    5.46    0.32
 -12  10   2    4.34    0.33
  12  10  -2    5.02    0.36
 -12  10   2    4.86    0.27
  12  10  -2    5.07    0.27
  12  10  -2    4.54    0.28
  10 -10  -2    0.05    0.05
 -10 -10   2    0.04    0.06
  10 -10  -2   -0.09    0.10
  10 -10  -2    0.01    0.02
 -10 -10   2    0.10    0.11
 -10  10   2    0.07    0.07
  10  10  -2    0.03    0.04
  10  10  -2    0.11    0.02
  10  10  -2    0.00    0.09
 -10  10   2    0.10    0.03
  -8 -10   2    0.00    0.09
   8 -10  -2   -0.01    0.02
  -8 -10   2   -0.09    0.05
   8 -10  -2   -0.04    0.07
   8  10  -2   -0.03    0.03
   8  10  -2    0.03    0.07
  -8  10   2    0.00    0.03
  -8  10   2   -0.04    0.02
  -6 -10   2    3.58    0.28
   6 -10  -2    3.84    0.26
  -6 -10   2    3.83    0.24
   6  10  -2    3.88    0.24
   6  10  -2    3.84    0.21
   6  10  -2    3.85    0.21
  -6  10   2    3.97    0.21
  -4 -10   2    1.99    0.17
   4 -10  -2    2.20    0.17
  -4 -10   2    2.53    0.19
  -4  10   2    2.25    0.14
   4  10  -2    2.38    0.14
   4  10  -2    2.55    0.15
   4  10  -2    2.42    0.13
  -2 -10   2   22.20    1.16
  -2 -10   2   21.42    1.16
   2 -10  -2   24.03    1.17
  -2  10   2   20.51    1.14
   2  10  -2   20.88    1.14
   0 -10   2    2.56    0.20
   0 -10  -2    2.74    0.19
   0  10   2    2.60    0.15
   0  10  -2    2.71    0.15
  -2 -10  -2    0.20    0.08
   2 -10   2    0.27    0.07
   2  10   2    0.22    0.02
   2  10   2    0.29    0.04
  -2  10  -2    0.31    0.04
   2  10   2    0.31    0.04
   2  10   2    0.31    0.03
   4 -10   2   18.54    0.93
  -4 -10  -2   15.66    0.92
  -4 -10  -2   18.39    0.91
  -4  10  -2   16.93    0.89
   4  10   2   17.66    0.89
   4  10   2   15.89    0.92
   4  10   2   16.41    0.89
   6 -10   2   13.55    0.69
  -6 -10  -2   13.05    0.73
   6 -10   2   13.35    0.69
  -6 -10  -2   13.38    0.71
   6  10   2   13.04    0.69
   6  10   2   12.94    0.73
   6  10   2   13.01    0.69
  -6  10  -2   12.11    0.69
   8 -10   2    1.75    0.16
  -8 -10  -2    2.24    0.15
   8 -10   2    2.21    0.12
  -8 -10  -2    1.79    0.20
   8  10   2    2.11    0.12
   8  10   2    2.51    0.22
  -8  10  -2    2.14    0.12
  -8  10  -2    1.95    0.12
   8  10   2    1.71    0.14
  10 -10   2    5.74    0.30
 -10 -10  -2    5.15    0.38
  10 -10   2    5.68    0.35
 -10 -10  -2    5.35    0.31
 -10  10  -2    5.38    0.29
  10  10   2    5.36    0.29
  10  10   2    5.27    0.31
 -10  10  -2    5.56    0.33
  10  10   2    5.05    0.38
 -10  10  -2    5.07    0.29
  12 -10   2   19.63    1.10
 -12 -10  -2   21.71    1.19
 -12 -10  -2   20.12    1.11
  12 -10   2   22.44    1.16
  12  10   2   20.87    1.11
 -12  10  -2   22.91    1.15
  12  10   2   20.56    1.18
  12  10   2   20.41    1.09
 -12  10  -2   20.49    1.10
 -12  10  -2   20.53    1.10
 -14 -10  -2    1.60    0.13
  14 -10   2    1.91    0.14
  14 -10   2    1.98    0.23
 -14 -10  -2    2.03    0.26
 -14  10  -2    2.05    0.11
 -14  10  -2    1.57    0.11
  14  10   2    1.86    0.11
  14  10   2    1.82    0.26
  14  10   2    1.54    0.15
 -16 -10  -2    0.93    0.20
 -16 -10  -2    0.65    0.08
  16 -10   2    0.63    0.08
  16 -10   2    0.88    0.19
  16  10   2    0.92    0.20
 -16  10  -2    0.76    0.16
 -16  10  -2    0.60    0.08
  16  10   2    0.72    0.09
 -16  10  -2    0.76    0.07
  16  10   2    0.72    0.06
  18 -10   2   10.67    0.68
  18 -10   2   10.92    0.59
 -18 -10  -2   11.07    0.58
 -18 -10  -2   10.33    0.70
  18  10   2   10.27    0.59
  18  10   2   10.54    0.70
 -18  10  -2    9.98    0.67
 -18  10  -2   11.22    0.57
  18  10   2   10.76    0.57
 -18  10  -2   10.49    0.57
  20 -10   2    2.23    0.18
 -20 -10  -2    2.17    0.15
  20 -10   2    2.11    0.31
 -20 -10  -2    1.97    0.31
 -20  10  -2    2.27    0.14
 -20  10  -2    2.51    0.15
  20  10   2    2.37    0.14
  20  10   2    1.97    0.30
  20  10   2    2.36    0.19
 -20  10  -2    2.12    0.30
  22 -10   2    1.88    0.17
  22 -10   2    1.50    0.25
 -22 -10  -2    1.75    0.13
 -22  10  -2    1.79    0.13
 -22  10  -2    1.54    0.25
 -22  10  -2    1.82    0.12
  22  10   2    1.93    0.19
  22  10   2    1.75    0.12
 -24 -10  -2    1.02    0.10
  24 -10   2    0.73    0.11
  24  10   2    1.25    0.15
 -24  10  -2    1.07    0.09
 -24  10  -2    1.03    0.09
  26 -10   2    0.59    0.10
 -26 -10  -2    0.83    0.09
 -26  10  -2    0.90    0.09
  26  10   2    0.70    0.11
 -28 -10  -2    1.10    0.10
  28 -10   2    0.88    0.12
 -28  10  -2    1.07    0.10
  28  10   2    0.89    0.12
 -30 -10  -2    0.48    0.07
  30 -10   2    0.31    0.11
  30  10   2    0.33    0.10
 -30  10  -2    0.43    0.07
 -32 -10  -2    1.48    0.12
  32 -10   2    1.32    0.18
 -32  10  -2    1.55    0.12
  32  10   2    1.42    0.18
  34 -10   2    1.03    0.14
 -34 -10  -2    1.46    0.12
 -34  10  -2    1.51    0.12
  36 -10   2    0.13    0.12
 -36 -10  -2    0.36    0.08
 -36  10  -2    0.43    0.08
  36  10   2    0.30    0.11
  38  10   2    0.37    0.11
 -38  10  -2    0.46    0.08
  35  11  -2   -0.22    0.09
 -33  11   2    0.76    0.10
  33  11  -2    0.56    0.11
 -31 -11   2    1.57    0.13
  31  11  -2    1.38    0.18
 -31  11   2    1.60    0.13
 -31  11   2    1.56    0.13
 -29 -11   2    0.04    0.06
 -29  11   2    0.06    0.05
  29  11  -2   -0.03    0.09
 -29  11   2    0.04    0.06
 -27 -11   2    0.31    0.08
 -27 -11   2    0.18    0.06
 -27  11   2    0.16    0.06
  27  11  -2    0.18    0.09
 -27  11   2    0.22    0.05
 -25 -11   2    2.09    0.15
  25 -11  -2    1.85    0.18
 -25  11   2    2.05    0.14
  25  11  -2    2.32    0.18
 -25  11   2    2.09    0.14
 -23 -11   2    0.10    0.06
  23 -11  -2   -0.10    0.06
 -23  11   2    0.09    0.04
 -23  11   2    0.01    0.05
  23  11  -2    0.17    0.07
 -21 -11   2    1.11    0.10
  21 -11  -2    0.81    0.10
 -21  11   2    1.00    0.09
  21  11  -2    1.04    0.09
 -21  11   2    1.14    0.09
 -19 -11   2    2.81    0.18
 -19 -11   2    2.90    0.35
  19 -11  -2    2.67    0.19
  19 -11  -2    2.91    0.28
  19  11  -2    3.01    0.20
 -19  11   2    2.84    0.17
 -19  11   2    2.65    0.17
  19  11  -2    2.96    0.17
  19  11  -2    2.64    0.30
 -19  11   2    3.24    0.34
  17 -11  -2    1.25    0.11
 -17 -11   2    1.31    0.11
 -17 -11   2    1.09    0.21
 -17  11   2    1.49    0.10
  17  11  -2    1.31    0.20
 -17  11   2    1.27    0.10
  17  11  -2    1.64    0.14
  17  11  -2    1.35    0.09
 -17  11   2    0.95    0.18
  15 -11  -2    0.23    0.05
  15 -11  -2    0.17    0.10
 -15 -11   2    0.36    0.16
 -15 -11   2    0.16    0.06
 -15  11   2    0.22    0.04
  15  11  -2    0.30    0.12
  15  11  -2    0.21    0.04
  15  11  -2    0.35    0.06
 -15  11   2    0.39    0.12
  13 -11  -2    1.77    0.17
 -13 -11   2    2.23    0.29
 -13 -11   2    1.80    0.14
  13 -11  -2    1.77    0.12
 -13  11   2    1.96    0.20
  13  11  -2    1.96    0.14
  13  11  -2    1.88    0.12
  13  11  -2    2.06    0.23
 -13  11   2    1.91    0.12
  11 -11  -2    1.71    0.13
  11 -11  -2    1.57    0.11
  11 -11  -2    1.53    0.17
 -11 -11   2    2.14    0.26
 -11 -11   2    1.54    0.14
 -11  11   2    1.83    0.11
  11  11  -2    1.88    0.11
  11  11  -2    1.78    0.13
 -11  11   2    1.41    0.16
  11  11  -2    1.90    0.20
  -9 -11   2    0.66    0.09
   9 -11  -2    0.89    0.13
  -9 -11   2    0.92    0.16
   9 -11  -2    0.94    0.06
  -9  11   2    0.88    0.07
   9  11  -2    0.89    0.07
   9  11  -2    0.85    0.08
   9  11  -2    1.05    0.15
  -7 -11   2    3.47    0.27
  -7 -11   2    3.15    0.21
   7 -11  -2    2.66    0.24
  -7  11   2    3.31    0.18
   7  11  -2    3.07    0.22
   7  11  -2    3.19    0.18
   7  11  -2    3.17    0.18
   5 -11  -2    0.36    0.11
  -5 -11   2    0.48    0.09
  -5 -11   2    0.44    0.10
   5  11  -2    0.47    0.04
  -5  11   2    0.45    0.05
   5  11  -2    0.42    0.06
   5  11  -2    0.45    0.05
  -3 -11   2    1.73    0.15
   3 -11  -2    1.73    0.15
  -3 -11   2    1.79    0.14
   3  11  -2    1.74    0.11
  -3  11   2    1.58    0.11
   3  11  -2    1.69    0.11
   3  11  -2    1.63    0.09
   1 -11  -2    0.23    0.07
  -1 -11   2    0.09    0.08
  -1  11   2    0.15    0.03
   1  11  -2    0.18    0.04
  -1 -11  -2   18.15    1.00
   1 -11   2   20.65    1.01
   1  11   2   18.04    0.98
  -1  11  -2   17.86    0.98
  -3 -11  -2   -0.03    0.07
   3 -11   2   -0.13    0.06
  -3  11  -2    0.01    0.03
   3  11   2   -0.01    0.03
   3  11   2    0.04    0.03
  -5 -11  -2    0.22    0.06
  -5 -11  -2    0.28    0.07
   5 -11   2    0.21    0.09
   5  11   2    0.19    0.07
  -5  11  -2    0.31    0.04
   5  11   2    0.30    0.04
   5  11   2    0.26    0.03
  -7 -11  -2    1.61    0.15
  -7 -11  -2    1.54    0.19
  -7  11  -2    1.87    0.11
   7  11   2    1.71    0.12
   7  11   2    1.85    0.11
   7  11   2    2.05    0.19
  -9 -11  -2    0.40    0.08
   9 -11   2    0.37    0.07
  -9 -11  -2    0.37    0.12
   9 -11   2    0.46    0.06
   9  11   2    0.42    0.06
  -9  11  -2    0.41    0.05
  -9  11  -2    0.48    0.06
   9  11   2    0.44    0.12
   9  11   2    0.43    0.06
  11 -11   2    2.11    0.20
 -11 -11  -2    1.96    0.16
 -11 -11  -2    2.44    0.26
  11 -11   2    2.31    0.14
 -11  11  -2    2.16    0.13
  11  11   2    2.37    0.25
  11  11   2    2.10    0.16
 -11  11  -2    2.16    0.14
  11  11   2    2.44    0.13
 -11  11  -2    2.70    0.19
  13 -11   2    0.39    0.11
 -13 -11  -2    0.19    0.06
 -13 -11  -2    0.14    0.12
  13  11   2    0.20    0.07
 -13  11  -2    0.20    0.04
  13  11   2    0.18    0.04
  13  11   2    0.28    0.13
 -13  11  -2    0.18    0.05
 -13  11  -2    0.24    0.10
  15 -11   2    3.38    0.21
 -15 -11  -2    3.05    0.20
 -15 -11  -2    2.50    0.30
  15  11   2    3.34    0.32
  15  11   2    3.13    0.22
 -15  11  -2    3.37    0.28
 -15  11  -2    3.38    0.19
 -15  11  -2    3.31    0.19
  15  11   2    3.28    0.18
  17 -11   2    0.16    0.06
 -17 -11  -2    0.25    0.16
  17 -11   2    0.21    0.13
 -17 -11  -2    0.07    0.06
 -17  11  -2    0.20    0.04
  17  11   2    0.29    0.15
  17  11   2    0.17    0.04
 -17  11  -2    0.12    0.05
  17  11   2    0.10    0.07
 -19 -11  -2    1.09    0.11
  19 -11   2    0.89    0.13
 -19 -11  -2    0.99    0.22
  19 -11   2    1.17    0.21
 -19  11  -2    1.04    0.10
 -19  11  -2    0.71    0.19
  19  11   2    1.26    0.14
 -19  11  -2    1.23    0.09
  19  11   2    1.13    0.22
  19  11   2    1.17    0.09
 -21 -11  -2    1.50    0.12
  21 -11   2    1.61    0.16
  21  11   2    1.80    0.18
 -21  11  -2    1.41    0.11
  21  11   2    1.47    0.10
 -21  11  -2    1.52    0.11
  23 -11   2    0.43    0.09
 -23 -11  -2    0.44    0.07
 -23  11  -2    0.54    0.08
  23  11   2    0.45    0.10
 -25 -11  -2    0.05    0.06
  25 -11   2    0.05    0.08
 -25  11  -2    0.04    0.04
 -25  11  -2    0.04    0.05
  25  11   2    0.00    0.08
 -27 -11  -2    0.75    0.10
  27  11   2    0.71    0.11
 -27  11  -2    0.68    0.09
 -29 -11  -2    0.06    0.06
  29  11   2    0.01    0.09
 -29  11  -2   -0.04    0.05
 -31 -11  -2    0.24    0.07
 -31  11  -2    0.22    0.06
  31  11   2    0.09    0.10
 -33 -11  -2    0.73    0.10
  33  11   2    0.73    0.12
 -33  11  -2    0.73    0.09
 -35 -11  -2    0.77    0.15
  35  11   2    0.61    0.12
 -35  11  -2    1.08    0.10
  37  11   2   -0.06    0.09
 -37  11  -2    0.11    0.07
  36  12  -2   -0.19    0.09
  34  12  -2    0.69    0.12
  32  12  -2   -0.06    0.09
 -32  12   2    0.00    0.06
 -30 -12   2    0.55    0.08
 -30  12   2    0.60    0.08
  30  12  -2    0.49    0.10
 -30  12   2    0.75    0.09
 -28 -12   2    0.05    0.06
 -28  12   2    0.02    0.06
 -28  12   2    0.13    0.05
  28  12  -2    0.06    0.08
 -26 -12   2    0.15    0.06
 -26  12   2    0.12    0.05
 -26  12   2    0.08    0.06
  26  12  -2   -0.02    0.08
 -24 -12   2    0.54    0.08
  24  12  -2    0.55    0.07
  24  12  -2    0.56    0.09
 -24  12   2    0.59    0.07
 -24  12   2    0.49    0.06
 -22 -12   2    0.79    0.09
  22  12  -2    0.73    0.08
 -22  12   2    0.67    0.09
  22  12  -2    0.72    0.10
 -22  12   2    0.71    0.08
 -20 -12   2    0.33    0.20
 -20  12   2    0.13    0.04
  20  12  -2    0.10    0.07
 -20  12   2   -0.01    0.05
 -18 -12   2    0.45    0.18
 -18 -12   2    0.55    0.08
  18  12  -2    0.49    0.16
  18  12  -2    0.58    0.06
 -18  12   2    0.54    0.06
  18  12  -2    0.46    0.08
 -16 -12   2    3.12    0.20
 -16 -12   2    2.97    0.34
  16  12  -2    2.92    0.17
  16  12  -2    3.02    0.20
 -16  12   2    2.99    0.18
  16  12  -2    2.97    0.30
 -14 -12   2    2.77    0.19
 -14 -12   2    2.40    0.32
  14 -12  -2    3.01    0.26
  14  12  -2    2.75    0.26
 -14  12   2    3.32    0.25
  14  12  -2    2.94    0.19
  14  12  -2    2.76    0.16
 -14  12   2    2.93    0.17
 -12 -12   2    4.05    0.41
  12 -12  -2    4.74    0.33
 -12 -12   2    4.19    0.26
  12 -12  -2    4.59    0.27
  12  12  -2    4.38    0.25
 -12  12   2    4.53    0.25
  12  12  -2    4.76    0.26
 -12  12   2    4.99    0.28
  12  12  -2    4.79    0.33
 -10 -12   2    7.04    0.48
  10 -12  -2    6.33    0.42
 -10 -12   2    6.94    0.40
  10  12  -2    6.95    0.44
 -10  12   2    7.20    0.38
  10  12  -2    7.20    0.38
  10  12  -2    7.47    0.39
   8 -12  -2    8.30    0.54
  -8 -12   2    9.17    0.51
  -8 -12   2   10.26    0.58
   8  12  -2    9.65    0.53
  -8  12   2    9.13    0.49
   8  12  -2    9.11    0.49
   6 -12  -2    2.30    0.22
  -6 -12   2    2.39    0.23
  -6 -12   2    2.61    0.19
   6  12  -2    2.62    0.15
   6  12  -2    2.68    0.18
  -6  12   2    2.61    0.15
   6  12  -2    2.79    0.16
  -4 -12   2    2.31    0.18
  -4 -12   2    2.18    0.18
   4 -12  -2    2.56    0.20
  -4  12   2    2.18    0.14
   4  12  -2    2.15    0.13
   4  12  -2    2.19    0.14
   2 -12  -2    4.60    0.30
  -2 -12   2    4.67    0.30
  -2  12   2    5.18    0.27
   2  12  -2    4.98    0.27
   0 -12   2    2.24    0.20
   0 -12  -2    2.06    0.19
   0  12  -2    2.25    0.14
   0  12   2    2.23    0.13
   2 -12   2   14.27    0.81
  -2 -12  -2   15.24    0.80
  -2  12  -2   14.94    0.77
   2  12   2   14.38    0.77
   4 -12   2   19.18    1.05
  -4 -12  -2   18.91    1.02
   4  12   2   18.48    1.01
  -4  12  -2   19.12    1.01
   4  12   2   20.21    1.02
  -6 -12  -2    1.88    0.15
   6 -12   2    2.01    0.22
  -6 -12  -2    2.30    0.19
   6  12   2    2.42    0.19
  -6  12  -2    2.26    0.13
   6  12   2    2.28    0.13
   6  12   2    2.10    0.13
   8 -12   2    4.15    0.32
  -8 -12  -2    4.10    0.26
  -8 -12  -2    4.75    0.32
   8  12   2    4.02    0.23
  -8  12  -2    4.24    0.24
   8  12   2    4.80    0.31
 -10 -12  -2    0.00    0.11
  10 -12   2    0.04    0.05
  10 -12   2    0.03    0.03
 -10 -12  -2    0.12    0.07
  10  12   2    0.12    0.11
  10  12   2    0.07    0.04
 -10  12  -2    0.03    0.03
  10  12   2    0.04    0.04
 -12 -12  -2    0.73    0.11
  12 -12   2    0.51    0.10
 -12  12  -2    0.91    0.08
 -12  12  -2    0.78    0.07
  12  12   2    0.80    0.11
  12  12   2    0.73    0.06
  12  12   2    0.56    0.15
 -14 -12  -2   15.91    1.00
 -14 -12  -2   17.55    0.91
 -14  12  -2   16.89    0.90
  14  12   2   17.77    1.01
 -14  12  -2   16.27    0.90
  14  12   2   18.07    0.92
 -14  12  -2   16.94    0.95
  14  12   2   17.08    0.90
 -16 -12  -2   -0.06    0.07
 -16 -12  -2    0.07    0.15
 -16  12  -2    0.04    0.04
  16  12   2    0.04    0.06
 -16  12  -2   -0.01    0.05
  16  12   2    0.17    0.15
  16  12   2    0.11    0.04
 -18 -12  -2    0.13    0.06
 -18 -12  -2    0.22    0.16
  18  12   2    0.09    0.04
  18  12   2    0.17    0.16
 -18  12  -2    0.09    0.04
 -18  12  -2    0.12    0.05
  18  12   2    0.14    0.07
 -20 -12  -2    0.98    0.23
 -20 -12  -2    1.41    0.12
 -20  12  -2    1.49    0.11
 -20  12  -2    1.21    0.10
  20  12   2    1.49    0.16
  20  12   2    1.42    0.10
 -22 -12  -2    0.11    0.06
  22  12   2    0.21    0.08
 -22  12  -2    0.17    0.05
 -22  12  -2    0.18    0.05
  22  12   2    0.16    0.05
 -24 -12  -2    0.08    0.06
  24  12   2    0.08    0.08
 -24  12  -2    0.05    0.05
 -24  12  -2    0.08    0.05
 -26 -12  -2    0.30    0.07
  26  12   2    0.21    0.09
 -26  12  -2    0.23    0.06
 -26  12  -2    0.27    0.05
 -28 -12  -2    0.08    0.06
  28  12   2    0.02    0.09
 -28  12  -2    0.09    0.05
 -30 -12  -2    0.04    0.06
  30  12   2    0.00    0.09
 -30  12  -2   -0.02    0.06
 -32 -12  -2    0.69    0.11
  32  12   2    0.58    0.12
 -32  12  -2    0.61    0.09
 -34 -12  -2    0.49    0.09
 -34  12  -2    0.42    0.08
  34  12   2    0.42    0.11
 -36  12  -2   -0.02    0.06
  36  12   2   -0.14    0.09
  35  13  -2   -0.18    0.09
  33  13  -2    0.27    0.10
  31  13  -2   -0.15    0.09
 -31  13   2    0.08    0.05
 -29 -13   2    0.04    0.06
  29  13  -2   -0.14    0.09
 -29  13   2    0.04    0.05
 -27 -13   2    0.09    0.06
 -27  13   2    0.05    0.05
  27  13  -2   -0.06    0.08
 -25 -13   2    0.31    0.07
  25  13  -2    0.20    0.06
 -25  13   2    0.26    0.05
  25  13  -2    0.20    0.09
 -23 -13   2    0.56    0.08
  23  13  -2    0.60    0.08
  23  13  -2    0.46    0.09
 -23  13   2    0.70    0.08
 -21 -13   2    1.48    0.13
  21  13  -2    1.45    0.11
  21  13  -2    1.48    0.15
 -21  13   2    1.41    0.11
 -19 -13   2    0.31    0.07
  19 -13  -2    0.13    0.13
 -19 -13   2    0.47    0.21
  19  13  -2    0.21    0.15
 -19  13   2    0.39    0.05
  19  13  -2    0.34    0.08
  19  13  -2    0.36    0.05
 -17 -13   2    2.68    0.37
  17 -13  -2    2.64    0.27
 -17  13   2    2.79    0.16
  17  13  -2    2.92    0.16
  17  13  -2    2.49    0.19
  17  13  -2    2.20    0.28
  15 -13  -2   13.30    0.76
 -15 -13   2   13.90    0.73
  15  13  -2   13.17    0.80
 -15  13   2   13.23    0.71
  15  13  -2   13.04    0.72
  15  13  -2   13.81    0.71
  13 -13  -2    1.19    0.19
 -13 -13   2    1.90    0.25
 -13 -13   2    1.61    0.14
  13  13  -2    1.57    0.21
  13  13  -2    1.67    0.11
 -13  13   2    1.51    0.12
  13  13  -2    1.41    0.13
 -11 -13   2    1.52    0.21
 -11 -13   2    1.39    0.14
  11 -13  -2    1.66    0.20
  11  13  -2    1.43    0.12
 -11  13   2    1.61    0.10
  11  13  -2    1.74    0.11
  11  13  -2    1.54    0.20
  -9 -13   2    1.21    0.11
  -9 -13   2    1.29    0.18
   9 -13  -2    1.50    0.15
  -9  13   2    1.18    0.09
   9  13  -2    1.09    0.08
   9  13  -2    0.93    0.15
   9  13  -2    1.04    0.09
   7 -13  -2    0.14    0.09
  -7 -13   2    0.22    0.09
  -7 -13   2    0.26    0.11
   7  13  -2    0.25    0.04
   7  13  -2    0.13    0.07
  -7  13   2    0.20    0.05
  -5 -13   2   12.56    0.71
  -5 -13   2   14.33    0.72
   5 -13  -2   12.96    0.73
   5  13  -2   12.45    0.68
  -5  13   2   12.37    0.68
   5  13  -2   13.17    0.69
   3 -13  -2    3.07    0.25
  -3 -13   2    3.16    0.24
   3  13  -2    3.11    0.18
  -3  13   2    3.64    0.19
  -1 -13   2   12.48    0.73
   1 -13  -2   13.10    0.74
  -1  13   2   13.91    0.70
   1  13  -2   13.71    0.70
   1 -13   2   16.53    0.90
  -1 -13  -2   16.24    0.88
   1  13   2   16.42    0.86
  -1  13  -2   16.09    0.86
   3 -13   2    1.55    0.16
  -3 -13  -2    1.26    0.16
  -3  13  -2    1.69    0.11
   3  13   2    1.55    0.11
  -5 -13  -2   13.31    0.72
   5 -13   2   14.40    0.75
  -5 -13  -2   13.23    0.71
   5  13   2   12.40    0.70
  -5  13  -2   12.54    0.70
   5  13   2   13.52    0.71
  -7 -13  -2   13.97    0.81
   7 -13   2   14.46    0.81
  -7 -13  -2   14.53    0.79
   7  13   2   15.46    0.81
   7  13   2   14.31    0.76
  -7  13  -2   14.14    0.76
  -9 -13  -2   21.73    1.19
   9 -13   2   19.68    1.16
  -9 -13  -2   21.77    1.14
   9  13   2   19.78    1.12
  -9  13  -2   21.62    1.12
   9  13   2   23.51    1.13
 -11 -13  -2    0.75    0.16
 -11 -13  -2    0.71    0.09
  11  13   2    0.56    0.14
  11  13   2    0.79    0.07
  11  13   2    0.71    0.10
 -11  13  -2    0.71    0.06
 -13 -13  -2    8.53    0.50
 -13 -13  -2    9.42    0.60
 -13  13  -2    8.99    0.48
  13  13   2    9.05    0.49
  13  13   2    8.35    0.58
  13  13   2    9.09    0.48
 -15 -13  -2    8.46    0.47
  15  13   2    8.74    0.48
 -15  13  -2    8.25    0.46
  15  13   2    8.69    0.46
  15  13   2    7.97    0.57
 -15  13  -2    9.04    0.46
 -17 -13  -2    1.73    0.15
  17  13   2    2.11    0.17
  17  13   2    1.83    0.12
  17  13   2    2.02    0.30
 -17  13  -2    1.88    0.13
 -17  13  -2    1.92    0.12
 -19 -13  -2    0.10    0.07
 -19 -13  -2   -0.12    0.20
 -19  13  -2    0.11    0.04
  19  13   2    0.10    0.07
 -19  13  -2    0.14    0.04
  19  13   2    0.15    0.04
 -21 -13  -2    0.12    0.06
  21  13   2    0.22    0.08
 -21  13  -2    0.15    0.06
 -21  13  -2    0.14    0.05
  21  13   2    0.22    0.06
 -23 -13  -2   -0.06    0.06
 -23  13  -2    0.02    0.04
 -23  13  -2   -0.02    0.05
  23  13   2    0.08    0.05
  23  13   2    0.04    0.08
 -25 -13  -2    1.94    0.14
 -25  13  -2    1.77    0.13
  25  13   2    1.67    0.20
 -25  13  -2    1.78    0.13
 -27 -13  -2    1.18    0.12
  27  13   2    0.99    0.13
 -27  13  -2    1.10    0.11
 -27  13  -2    1.28    0.11
 -29 -13  -2    0.00    0.06
 -29  13  -2   -0.01    0.06
  29  13   2   -0.01    0.09
 -31 -13  -2    0.14    0.07
 -31  13  -2    0.07    0.06
  31  13   2    0.00    0.10
 -33 -13  -2    0.49    0.08
 -33  13  -2    0.32    0.07
  33  13   2    0.30    0.11
  35  13   2   -0.02    0.10
 -35  13  -2    0.09    0.07
  34  14  -2   -0.18    0.10
  32 -14  -2    0.85    0.21
  30 -14  -2    0.39    0.18
 -30  14   2    0.08    0.05
  30  14  -2   -0.21    0.09
 -28 -14   2    0.07    0.06
  28 -14  -2    0.11    0.18
 -28  14   2    0.06    0.05
  28  14  -2   -0.06    0.09
  26 -14  -2    0.12    0.16
 -26 -14   2    0.03    0.06
  26  14  -2    0.01    0.08
 -26  14   2    0.12    0.05
  26  14  -2    0.02    0.05
 -24 -14   2    0.13    0.06
  24 -14  -2    0.09    0.15
  24  14  -2    0.07    0.08
  24  14  -2    0.22    0.06
 -24  14   2    0.17    0.05
 -22 -14   2    3.38    0.21
  22 -14  -2    3.31    0.31
 -22  14   2    3.37    0.19
  22  14  -2    3.09    0.23
  22  14  -2    3.36    0.20
  20 -14  -2    0.79    0.18
 -20 -14   2    0.83    0.11
 -20  14   2    0.87    0.09
  20  14  -2    0.63    0.10
  20  14  -2    0.86    0.09
 -18 -14   2    0.17    0.06
  18 -14  -2    0.00    0.14
 -18  14   2    0.21    0.04
  18  14  -2    0.18    0.04
  18  14  -2    0.09    0.07
 -16 -14   2   11.79    0.61
  16 -14  -2   10.73    0.65
  16  14  -2   10.69    0.60
  16  14  -2   11.04    0.59
 -16  14   2   10.99    0.59
 -14 -14   2    1.51    0.14
  14 -14  -2    1.56    0.21
 -14  14   2    1.50    0.10
  14  14  -2    1.68    0.11
  14  14  -2    1.26    0.18
  12 -14  -2   -0.10    0.11
 -12 -14   2   -0.02    0.07
 -12 -14   2   -0.10    0.22
 -12  14   2   -0.01    0.03
  12  14  -2   -0.02    0.04
 -10 -14   2    0.85    0.11
  10 -14  -2    1.13    0.15
  10  14  -2    0.90    0.13
  10  14  -2    1.05    0.08
 -10  14   2    1.09    0.09
   8 -14  -2   -0.01    0.08
  -8 -14   2    0.00    0.08
  -8 -14   2    0.21    0.11
   8  14  -2   -0.03    0.06
   8  14  -2    0.09    0.03
  -8  14   2    0.04    0.04
   6 -14  -2    1.73    0.17
  -6 -14   2    1.76    0.17
  -6 -14   2    2.07    0.18
   6  14  -2    1.86    0.12
  -6  14   2    2.01    0.12
   6  14  -2    1.87    0.13
  -4 -14   2    0.60    0.12
   4 -14  -2    0.52    0.12
   4  14  -2    0.87    0.08
  -4  14   2    0.87    0.08
  -2 -14   2    0.15    0.08
   2 -14  -2    0.23    0.08
  -2  14   2    0.27    0.04
   2  14  -2    0.24    0.04
   0 -14  -2    0.17    0.08
   0 -14   2    0.16    0.10
   0  14  -2    0.25    0.04
   0  14   2    0.27    0.04
  -2 -14  -2    5.20    0.33
   2 -14   2    5.09    0.34
  -2  14  -2    5.33    0.29
   2  14   2    5.55    0.29
  -4 -14  -2    0.11    0.09
   4 -14   2    0.17    0.11
   4  14   2    0.29    0.04
  -4  14  -2    0.27    0.05
   6 -14   2    5.11    0.32
  -6 -14  -2    4.80    0.30
  -6 -14  -2    5.13    0.31
   6  14   2    4.92    0.28
   6  14   2    4.88    0.27
  -6  14  -2    4.88    0.27
   8 -14   2   19.03    1.08
  -8 -14  -2   21.00    1.08
  -8 -14  -2   18.16    1.03
   8  14   2   19.96    1.02
   8  14   2   19.44    1.06
  -8  14  -2   18.74    1.02
  10 -14   2    2.57    0.25
 -10 -14  -2    2.24    0.18
  10  14   2    2.42    0.14
  10  14   2    2.42    0.34
 -12 -14  -2    0.08    0.07
  12 -14   2    0.14    0.13
  12  14   2    0.12    0.03
 -12  14  -2    0.08    0.04
 -14 -14  -2   11.79    0.65
 -14  14  -2   12.01    0.63
  14  14   2   11.94    0.63
 -16 -14  -2    1.50    0.14
  16  14   2    1.58    0.16
 -16  14  -2    1.65    0.11
 -18 -14  -2    1.90    0.15
 -18  14  -2    1.87    0.13
  18  14   2    1.91    0.13
  18  14   2    2.02    0.18
 -20 -14  -2   -0.08    0.06
  20  14   2   -0.01    0.08
 -20  14  -2   -0.04    0.05
 -20  14  -2   -0.05    0.04
  20  14   2    0.00    0.04
 -22 -14  -2    0.82    0.10
 -22  14  -2    0.78    0.08
  22  14   2    0.74    0.11
  22  14   2    0.78    0.09
 -22  14  -2    0.89    0.09
 -24 -14  -2    1.49    0.13
 -24  14  -2    1.54    0.12
  24  14   2    1.45    0.18
 -24  14  -2    1.61    0.12
 -26 -14  -2    0.38    0.07
 -26  14  -2    0.34    0.07
  26  14   2    0.25    0.10
 -26  14  -2    0.37    0.06
 -28 -14  -2    0.25    0.07
 -28  14  -2    0.22    0.06
  28  14   2    0.12    0.09
 -30 -14  -2    0.26    0.07
 -30  14  -2    0.17    0.08
  30  14   2    0.14    0.10
 -32 -14  -2    0.23    0.07
  32  14   2    0.18    0.10
 -32  14  -2    0.14    0.06
 -34 -14  -2    0.47    0.09
  34  14   2    0.19    0.11
 -34  14  -2    0.31    0.07
  33 -15  -2    1.15    0.22
  31 -15  -2    0.09    0.17
  29 -15  -2    0.21    0.17
 -29 -15   2    0.10    0.07
  29  15  -2   -0.21    0.09
 -29  15   2    0.00    0.05
 -27 -15   2    0.32    0.08
  27 -15  -2    0.41    0.18
 -27  15   2    0.34    0.06
  27  15  -2    0.20    0.09
  25 -15  -2    0.18    0.17
 -25 -15   2    0.25    0.07
  25  15  -2    0.03    0.08
 -25  15   2    0.19    0.05
  25  15  -2    0.12    0.06
 -23 -15   2    0.30    0.07
  23 -15  -2    0.36    0.15
  23  15  -2    0.14    0.08
 -23  15   2    0.35    0.06
  23  15  -2    0.29    0.06
 -21 -15   2    1.25    0.12
  21 -15  -2    0.89    0.18
  21  15  -2    1.15    0.10
  21  15  -2    0.82    0.11
 -21  15   2    1.01    0.10
  19 -15  -2    0.23    0.15
 -19 -15   2    0.07    0.07
  19  15  -2   -0.08    0.07
 -19  15   2    0.03    0.05
  19  15  -2    0.03    0.05
  17 -15  -2    1.19    0.18
 -17 -15   2    1.16    0.13
 -17  15   2    1.38    0.10
  17  15  -2    1.16    0.09
  15 -15  -2    4.59    0.34
 -15 -15   2    4.47    0.29
  15  15  -2    4.73    0.26
 -15  15   2    4.83    0.26
 -13 -15   2    0.90    0.12
  13 -15  -2    0.89    0.14
  13  15  -2    1.00    0.09
 -13  15   2    0.93    0.08
 -11 -15   2    0.46    0.09
  11 -15  -2    0.40    0.13
  11  15  -2    0.37    0.05
 -11  15   2    0.39    0.05
   9 -15  -2   -0.08    0.12
  -9 -15   2    0.02    0.08
  -9  15   2    0.11    0.04
   9  15  -2    0.10    0.04
   7 -15  -2   -0.18    0.10
  -7 -15   2    0.01    0.06
  -7  15   2    0.05    0.04
   7  15  -2    0.05    0.04
   5 -15  -2   -0.01    0.10
  -5  15   2    0.09    0.04
   5  15  -2    0.09    0.03
   3 -15  -2    0.12    0.10
  -3  15   2    0.24    0.05
   3  15  -2    0.22    0.05
   1 -15  -2    1.36    0.17
   1  15  -2    1.64    0.11
  -1  15   2    1.57    0.11
   1 -15   2    0.83    0.15
  -1 -15  -2    0.84    0.12
   1  15   2    0.65    0.09
  -1  15  -2    0.94    0.07
   3 -15   2    4.70    0.33
  -3 -15  -2    5.13    0.31
  -3  15  -2    4.91    0.27
  -5 -15  -2    0.07    0.09
   5 -15   2    0.10    0.11
  -5  15  -2    0.17    0.04
  -7 -15  -2    0.37    0.07
   7 -15   2    0.30    0.10
  -7  15  -2    0.27    0.04
   7  15   2    0.31    0.05
   9 -15   2   15.29    0.91
  -9 -15  -2   16.72    0.88
  -9  15  -2   16.01    0.86
   9  15   2   16.80    0.86
  11 -15   2    0.73    0.13
 -11 -15  -2    0.65    0.10
 -11  15  -2    0.78    0.07
  11  15   2    0.72    0.07
 -13 -15  -2    0.02    0.07
  13 -15   2   -0.04    0.10
 -13  15  -2    0.08    0.03
  13  15   2    0.10    0.04
  15 -15   2    5.61    0.41
 -15 -15  -2    5.63    0.33
 -15  15  -2    5.69    0.31
  15  15   2    5.75    0.31
  17 -15   2    0.11    0.11
 -17 -15  -2    0.20    0.07
 -17  15  -2    0.24    0.05
  17  15   2    0.20    0.05
 -19 -15  -2    0.50    0.08
 -19  15  -2    0.60    0.08
  19  15   2    0.45    0.06
  19  15   2    0.54    0.14
 -21 -15  -2    0.82    0.11
  21  15   2    0.77    0.09
  21  15   2    0.69    0.12
 -21  15  -2    0.77    0.09
 -23 -15  -2    0.10    0.07
 -23  15  -2    0.11    0.05
  23  15   2    0.06    0.09
 -25 -15  -2    0.68    0.10
 -25  15  -2    0.52    0.07
  25  15   2    0.50    0.11
 -27 -15  -2    0.05    0.06
  27  15   2    0.05    0.10
 -27  15  -2    0.08    0.05
 -29 -15  -2    0.02    0.07
  29  15   2   -0.14    0.10
  31  15   2    0.11    0.11
  32 -16  -2    0.58    0.19
  30 -16  -2    0.70    0.20
 -30  16   2    0.26    0.06
 -28 -16   2    1.15    0.12
  28 -16  -2    1.33    0.23
 -28  16   2    1.08    0.11
 -26 -16   2    0.17    0.07
  26 -16  -2    0.35    0.17
 -26  16   2    0.14    0.06
 -24 -16   2    0.04    0.06
  24 -16  -2   -0.11    0.16
  24  16  -2    0.02    0.06
 -24  16   2   -0.02    0.05
  22 -16  -2    1.27    0.19
 -22 -16   2    1.30    0.13
 -22  16   2    1.28    0.11
  22  16  -2    1.23    0.11
 -20 -16   2    0.40    0.08
  20 -16  -2    0.15    0.16
  20  16  -2    0.26    0.06
 -20  16   2    0.26    0.05
 -18 -16   2    0.13    0.07
  18 -16  -2   -0.01    0.14
  18  16  -2    0.10    0.04
 -18  16   2    0.10    0.04
 -16 -16   2    2.13    0.16
  16 -16  -2    1.89    0.20
 -16  16   2    1.82    0.13
  16  16  -2    1.81    0.13
 -14 -16   2    0.44    0.09
  14 -16  -2    0.43    0.15
  14  16  -2    0.43    0.06
 -14  16   2    0.58    0.06
  12 -16  -2    1.63    0.22
 -12 -16   2    1.68    0.16
 -12  16   2    1.69    0.11
  12  16  -2    1.75    0.12
 -10 -16   2    1.34    0.15
  10 -16  -2    1.16    0.17
 -10  16   2    1.68    0.11
  10  16  -2    1.44    0.11
   8 -16  -2    0.07    0.09
  -8 -16   2    0.12    0.07
  -8  16   2    0.07    0.04
   8  16  -2    0.08    0.04
   6 -16  -2    3.22    0.23
  -6 -16   2    3.13    0.23
   6  16  -2    3.22    0.19
  -6  16   2    3.21    0.19
   4 -16  -2    0.34    0.09
  -4 -16   2    0.31    0.10
  -4  16   2    0.33    0.05
   4  16  -2    0.35    0.05
  -2 -16   2    5.57    0.34
   2 -16  -2    4.90    0.33
   2  16  -2    5.51    0.30
  -2  16   2    5.56    0.30
   0 -16  -2    0.09    0.10
   0 -16   2    0.02    0.07
   0  16  -2    0.09    0.04
   0  16   2    0.05    0.04
   2 -16   2    0.12    0.11
  -2 -16  -2    0.15    0.09
   2  16   2    0.12    0.05
  -2  16  -2    0.11    0.03
  -4 -16  -2    6.51    0.39
   4 -16   2    6.96    0.41
  -4  16  -2    6.49    0.36
   4  16   2    6.48    0.36
   6 -16   2    0.10    0.10
  -6 -16  -2    0.12    0.09
   6  16   2    0.16    0.05
  -6  16  -2    0.12    0.04
   8 -16   2    1.01    0.16
  -8 -16  -2    0.79    0.12
   8  16   2    1.23    0.09
  -8  16  -2    1.13    0.08
 -10 -16  -2    3.08    0.22
  10 -16   2    3.16    0.25
 -10  16  -2    3.54    0.19
  10  16   2    3.28    0.19
 -12 -16  -2    0.13    0.06
  12 -16   2    0.01    0.13
 -12  16  -2    0.13    0.05
  12  16   2    0.14    0.04
  14 -16   2   -0.08    0.10
 -14 -16  -2   -0.10    0.07
 -14  16  -2   -0.02    0.04
  14  16   2    0.01    0.04
 -16 -16  -2    0.56    0.09
  16 -16   2    0.44    0.17
 -16  16  -2    0.57    0.08
  16  16   2    0.65    0.08
 -18 -16  -2    0.29    0.07
  18 -16   2    0.10    0.16
 -18  16  -2    0.24    0.05
  18  16   2    0.26    0.05
  20 -16   2   -0.17    0.15
 -20 -16  -2    0.01    0.07
 -20  16  -2    0.01    0.04
  20  16   2   -0.01    0.05
 -22 -16  -2    0.08    0.07
  22 -16   2    0.04    0.16
 -22  16  -2    0.02    0.05
  22  16   2   -0.01    0.05
  24 -16   2    0.08    0.17
 -24 -16  -2    0.18    0.07
 -24  16  -2    0.11    0.05
  26 -16   2    0.08    0.18
 -26 -16  -2    0.14    0.07
 -26  16  -2    0.22    0.06
 -28 -16  -2    0.64    0.09
  28 -16   2    0.56    0.21
 -30 -16  -2    1.13    0.12
  30 -16   2    1.40    0.23
 -32 -16  -2    2.97    0.20
  32 -16   2    3.41    0.32
  31 -17  -2    0.73    0.20
  29 -17  -2    0.38    0.18
 -27 -17   2    0.25    0.08
  27 -17  -2    0.43    0.18
 -27  17   2    0.23    0.06
  25 -17  -2    0.80    0.18
 -25 -17   2    0.53    0.09
  25  17  -2    0.49    0.07
 -25  17   2    0.41    0.07
 -23 -17   2    0.06    0.07
  23 -17  -2   -0.11    0.15
  23  17  -2   -0.02    0.05
 -23  17   2   -0.01    0.05
 -21 -17   2    1.10    0.13
  21 -17  -2    1.15    0.19
 -21  17   2    0.96    0.10
  21  17  -2    1.01    0.10
  19 -17  -2    1.56    0.24
 -19 -17   2    1.85    0.15
  19  17  -2    1.78    0.13
 -19  17   2    1.92    0.13
 -17 -17   2   -0.05    0.07
  17 -17  -2   -0.04    0.14
 -17  17   2    0.01    0.05
  17  17  -2    0.06    0.05
  15 -17  -2    0.71    0.16
 -15 -17   2    0.57    0.10
 -15  17   2    0.53    0.06
  15  17  -2    0.55    0.08
 -13 -17   2    0.54    0.10
  13 -17  -2    0.39    0.14
 -13  17   2    0.44    0.06
  13  17  -2    0.37    0.06
  11 -17  -2    0.58    0.14
 -11 -17   2    0.62    0.11
  11  17  -2    0.69    0.07
 -11  17   2    0.68    0.07
   9 -17  -2    0.02    0.09
  -9 -17   2   -0.04    0.08
   9  17  -2    0.06    0.04
  -9  17   2   -0.02    0.05
  -7 -17   2   -0.08    0.09
   7 -17  -2   -0.14    0.11
   7  17  -2    0.04    0.03
  -7  17   2    0.02    0.04
   5 -17  -2    3.19    0.25
  -5 -17   2    3.26    0.24
   5  17  -2    3.10    0.19
  -5  17   2    3.55    0.20
  -3 -17   2    1.33    0.18
   3 -17  -2    1.36    0.16
   3  17  -2    1.60    0.10
  -3  17   2    1.58    0.10
  -1 -17   2    3.52    0.27
   1 -17  -2    3.49    0.27
  -1  17   2    3.90    0.22
   1  17  -2    3.73    0.21
   1 -17   2    0.52    0.11
  -1 -17  -2    0.65    0.10
  -1  17  -2    0.87    0.08
   1  17   2    0.71    0.07
   3 -17   2    1.62    0.20
  -3 -17  -2    1.85    0.18
  -3  17  -2    1.95    0.13
   3  17   2    1.60    0.11
  -5 -17  -2    4.67    0.30
   5 -17   2    4.47    0.33
   5  17   2    4.57    0.26
  -5  17  -2    4.77    0.26
   7 -17   2    1.31    0.17
  -7 -17  -2    1.34    0.13
  -7  17  -2    1.35    0.11
   7  17   2    1.52    0.11
   9 -17   2    0.00    0.13
  -9 -17  -2    0.11    0.07
   9  17   2    0.10    0.05
  -9  17  -2    0.13    0.05
  11 -17   2    4.65    0.34
 -11 -17  -2    4.65    0.29
  11  17   2    4.63    0.26
 -11  17  -2    4.35    0.25
  13 -17   2    0.14    0.14
 -13 -17  -2    0.22    0.09
 -13  17  -2    0.23    0.04
  13  17   2    0.19    0.05
 -15 -17  -2    0.04    0.08
  15 -17   2    0.08    0.11
  15  17   2    0.20    0.04
 -15  17  -2    0.16    0.05
  17 -17   2    2.23    0.27
 -17 -17  -2    2.51    0.19
 -17  17  -2    2.72    0.16
  17  17   2    2.89    0.17
 -19 -17  -2    0.22    0.08
  19 -17   2    0.07    0.16
  19  17   2    0.27    0.06
 -19  17  -2    0.32    0.05
 -21 -17  -2    1.98    0.15
  21 -17   2    1.65    0.21
 -21  17  -2    1.91    0.13
  21  17   2    2.00    0.14
  23 -17   2    0.53    0.18
 -23 -17  -2    0.36    0.08
 -23  17  -2    0.37    0.06
 -25 -17  -2    0.00    0.07
  25 -17   2    0.12    0.17
 -25  17  -2    0.05    0.05
  27 -17   2    0.36    0.18
 -27 -17  -2    0.21    0.07
 -27  17  -2    0.25    0.06
  29 -17   2    0.68    0.20
 -29 -17  -2    0.29    0.08
  31 -17   2    0.94    0.20
 -31 -17  -2    0.55    0.09
  28 -18  -2    0.35    0.18
 -26 -18   2    0.05    0.07
  26 -18  -2    0.15    0.17
 -26  18   2    0.00    0.05
  24 -18  -2    0.32    0.18
 -24 -18   2    0.35    0.08
 -24  18   2    0.28    0.06
  24  18  -2    0.29    0.06
  22 -18  -2   -0.01    0.14
 -22 -18   2    0.12    0.07
 -22  18   2    0.04    0.05
  22  18  -2   -0.06    0.05
  20 -18  -2    1.12    0.20
 -20 -18   2    1.03    0.13
  20  18  -2    0.97    0.10
 -20  18   2    0.92    0.08
  18 -18  -2    1.86    0.24
 -18 -18   2    2.11    0.16
  18  18  -2    1.92    0.13
 -18  18   2    1.84    0.13
  16 -18  -2    0.14    0.12
 -16 -18   2    0.31    0.09
 -16  18   2    0.27    0.06
  16  18  -2    0.21    0.05
  14 -18  -2    0.84    0.17
 -14 -18   2    0.84    0.13
  14  18  -2    0.90    0.08
 -14  18   2    0.91    0.08
 -12 -18   2    2.42    0.19
  12 -18  -2    2.36    0.22
 -12  18   2    2.43    0.15
  12  18  -2    2.59    0.16
  10 -18  -2    0.21    0.10
 -10 -18   2    0.20    0.09
 -10  18   2    0.20    0.04
  10  18  -2    0.21    0.05
   8 -18  -2   -0.01    0.11
  -8 -18   2   -0.07    0.06
   8  18  -2    0.05    0.05
  -8  18   2   -0.04    0.05
  -6 -18   2    2.21    0.19
   6 -18  -2    2.13    0.22
   6  18  -2    2.31    0.14
  -6  18   2    2.07    0.13
   4 -18  -2    0.52    0.13
  -4 -18   2    0.58    0.10
   4  18  -2    0.66    0.08
  -4  18   2    0.55    0.06
  -2 -18   2    3.36    0.26
   2 -18  -2    3.08    0.26
   2  18  -2    3.58    0.20
  -2  18   2    3.28    0.19
   0 -18  -2   -0.15    0.10
   0 -18   2   -0.14    0.11
   0  18   2   -0.02    0.04
   0  18  -2    0.06    0.05
  -2 -18  -2    0.65    0.10
   2 -18   2    0.65    0.14
   2  18   2    0.83    0.07
  -2  18  -2    0.86    0.07
  -4 -18  -2    9.80    0.54
   4 -18   2    9.37    0.56
  -4  18  -2    9.24    0.50
   4  18   2    9.28    0.50
  -6 -18  -2    1.42    0.15
   6 -18   2    1.93    0.22
  -6  18  -2    1.97    0.13
   6  18   2    1.81    0.12
  -8 -18  -2    0.62    0.11
   8 -18   2    0.64    0.14
   8  18   2    0.68    0.08
  -8  18  -2    0.58    0.08
  10 -18   2    0.76    0.14
 -10 -18  -2    0.77    0.11
 -10  18  -2    1.03    0.09
  10  18   2    0.96    0.09
  12 -18   2    8.83    0.54
  12  18   2    9.26    0.49
 -12  18  -2    9.17    0.49
  14 -18   2    0.57    0.16
 -14 -18  -2    0.49    0.10
 -14  18  -2    0.59    0.08
  14  18   2    0.63    0.08
 -16 -18  -2   -0.09    0.08
  16 -18   2    0.03    0.11
 -16  18  -2    0.03    0.05
  16  18   2    0.04    0.05
 -18 -18  -2    2.49    0.19
  18 -18   2    2.63    0.27
 -18  18  -2    2.45    0.15
  18  18   2    2.50    0.16
  20 -18   2    0.02    0.12
 -20 -18  -2    0.05    0.07
  20  18   2   -0.02    0.05
 -20  18  -2    0.01    0.04
  22 -18   2    0.05    0.16
 -22 -18  -2    0.10    0.07
 -22  18  -2    0.10    0.05
  24 -18   2    0.67    0.15
 -24 -18  -2    0.61    0.09
 -24  18  -2    0.70    0.10
 -26 -18  -2    0.02    0.07
  26 -18   2    0.00    0.17
  28 -18   2    0.42    0.19
 -28 -18  -2    0.35    0.08
  27 -19  -2    0.33    0.18
 -25 -19   2    0.95    0.13
  25 -19  -2    1.20    0.19
 -25  19   2    0.71    0.10
  23 -19  -2    0.22    0.17
 -23 -19   2    0.27    0.08
  23  19  -2    0.09    0.06
 -23  19   2    0.08    0.05
  21 -19  -2    0.51    0.17
 -21  19   2    0.38    0.07
  21  19  -2    0.40    0.07
  19 -19  -2    2.72    0.28
 -19 -19   2    2.99    0.20
 -19  19   2    2.92    0.18
  19  19  -2    2.78    0.18
 -17 -19   2    1.42    0.14
  17 -19  -2    1.24    0.20
  17  19  -2    1.21    0.11
 -17  19   2    1.30    0.11
 -15 -19   2    0.31    0.09
  15 -19  -2    0.21    0.12
  15  19  -2    0.21    0.06
 -15  19   2    0.31    0.05
  13 -19  -2    1.53    0.21
 -13 -19   2    1.68    0.17
  13  19  -2    1.82    0.13
 -13  19   2    1.90    0.13
 -11 -19   2    0.06    0.08
  11 -19  -2    0.01    0.12
  11  19  -2    0.11    0.05
 -11  19   2    0.11    0.05
  -9 -19   2   -0.07    0.07
   9 -19  -2   -0.11    0.11
   9  19  -2    0.02    0.03
  -9  19   2    0.01    0.04
   7 -19  -2    0.04    0.12
  -7 -19   2    0.12    0.08
  -7  19   2    0.14    0.05
   7  19  -2    0.15    0.04
  -5 -19   2   -0.06    0.09
   5 -19  -2   -0.03    0.11
   5  19  -2    0.03    0.03
  -5  19   2    0.00    0.03
   3 -19  -2    0.01    0.11
  -3 -19   2   -0.02    0.10
  -3  19   2    0.00    0.03
   3  19  -2    0.00    0.05
   1 -19  -2   -0.14    0.10
  -1 -19   2   -0.04    0.10
  -1  19   2   -0.03    0.03
   1  19  -2   -0.02    0.03
   1 -19   2    0.13    0.11
  -1 -19  -2    0.06    0.10
  -1  19  -2    0.19    0.05
   1  19   2    0.17    0.05
   3 -19   2    0.49    0.11
  -3 -19  -2    0.32    0.10
  -3  19  -2    0.42    0.06
   3  19   2    0.43    0.05
  -5 -19  -2    1.04    0.14
   5 -19   2    1.03    0.15
   5  19   2    1.07    0.08
  -5  19  -2    1.04    0.08
  -7 -19  -2    0.54    0.11
   7 -19   2    0.49    0.14
  -7  19  -2    0.57    0.08
   7  19   2    0.44    0.06
  -9 -19  -2    0.23    0.10
   9 -19   2    0.20    0.14
   9  19   2    0.25    0.05
  -9  19  -2    0.26    0.04
  11 -19   2    3.00    0.28
 -11 -19  -2    3.16    0.22
  11  19   2    3.21    0.18
 -11  19  -2    2.82    0.18
 -13 -19  -2    1.31    0.13
  13 -19   2    1.40    0.21
  13  19   2    1.48    0.11
 -13  19  -2    1.42    0.10
 -15 -19  -2   -0.05    0.07
  15 -19   2   -0.02    0.14
 -15  19  -2    0.00    0.05
  15  19   2   -0.04    0.04
 -17 -19  -2    0.22    0.08
  17 -19   2    0.24    0.12
  17  19   2    0.18    0.05
 -17  19  -2    0.15    0.05
  19 -19   2    1.29    0.19
 -19 -19  -2    1.43    0.14
 -19  19  -2    1.26    0.11
  19  19   2    1.33    0.11
 -21 -19  -2    0.65    0.09
 -21  19  -2    0.56    0.07
 -23 -19  -2    0.06    0.07
  23 -19   2   -0.05    0.15
 -25 -19  -2    0.15    0.07
  25 -19   2    0.36    0.18
 -25  19  -2    0.12    0.06
  27 -19   2    0.32    0.17
 -27 -19  -2    0.14    0.07
  26 -20  -2    0.26    0.16
  24 -20  -2    0.29    0.16
 -24 -20   2    0.31    0.08
  24  20  -2    0.17    0.06
 -24  20   2    0.17    0.06
  22 -20  -2    0.66    0.16
 -22  20   2    0.60    0.07
  22  20  -2    0.51    0.07
 -20 -20   2    1.75    0.15
  20 -20  -2    1.98    0.24
  20  20  -2    1.74    0.13
 -20  20   2    1.56    0.13
  18 -20  -2    0.48    0.17
 -18 -20   2    0.46    0.09
 -18  20   2    0.47    0.06
  18  20  -2    0.45    0.07
 -16 -20   2    0.61    0.10
  16 -20  -2    0.49    0.17
 -16  20   2    0.46    0.06
  16  20  -2    0.51    0.07
 -14 -20   2    0.09    0.08
  14 -20  -2   -0.01    0.11
 -14  20   2    0.07    0.05
  14  20  -2   -0.04    0.05
 -12 -20   2    1.63    0.16
  12 -20  -2    1.62    0.22
 -12  20   2    1.56    0.12
  12  20  -2    1.48    0.12
 -10 -20   2    0.14    0.08
  10 -20  -2    0.09    0.13
 -10  20   2    0.25    0.06
  10  20  -2    0.16    0.05
   8 -20  -2   -0.04    0.12
  -8 -20   2   -0.01    0.09
   8  20  -2    0.04    0.05
  -8  20   2    0.00    0.05
   6 -20  -2   -0.13    0.12
  -6 -20   2   -0.01    0.10
  -6  20   2    0.00    0.04
   6  20  -2    0.04    0.05
  -4 -20   2    0.35    0.09
   4 -20  -2    0.39    0.10
   4  20  -2    0.30    0.05
  -4  20   2    0.32    0.05
  -2 -20   2    0.32    0.12
   2 -20  -2    0.31    0.12
  -2  20   2    0.31    0.05
   2  20  -2    0.32    0.06
   0 -20  -2    0.44    0.12
   0 -20   2    0.61    0.13
   0  20  -2    0.57    0.07
   0  20   2    0.56    0.07
  -2 -20  -2   -0.12    0.10
   2 -20   2   -0.08    0.11
  -2  20  -2   -0.03    0.03
   2  20   2   -0.09    0.05
  -4 -20  -2   -0.12    0.10
   4 -20   2   -0.08    0.12
   4  20   2    0.01    0.04
  -4  20  -2   -0.03    0.05
   6 -20   2   -0.08    0.09
  -6 -20  -2   -0.02    0.07
   6  20   2    0.03    0.04
  -6  20  -2    0.03    0.05
   8 -20   2   -0.03    0.12
  -8 -20  -2    0.10    0.10
  -8  20  -2    0.05    0.05
   8  20   2    0.08    0.05
  10 -20   2    1.26    0.18
 -10 -20  -2    1.10    0.12
  10  20   2    1.15    0.10
 -10  20  -2    1.09    0.10
 -12 -20  -2    1.54    0.16
  12 -20   2    1.39    0.18
  12  20   2    1.49    0.12
 -12  20  -2    1.52    0.12
  14 -20   2    1.84    0.25
 -14 -20  -2    2.17    0.18
  14  20   2    2.01    0.14
 -14  20  -2    1.88    0.14
  16 -20   2    0.09    0.15
 -16 -20  -2    0.25    0.08
 -16  20  -2    0.14    0.05
  16  20   2    0.13    0.05
 -18 -20  -2    0.27    0.08
 -18  20  -2    0.17    0.05
  18  20   2    0.16    0.06
  20 -20   2    0.33    0.16
 -20 -20  -2    0.18    0.08
  20  20   2    0.13    0.06
  22 -20   2    0.37    0.17
 -22 -20  -2    0.38    0.08
 -22  20  -2    0.32    0.06
 -24 -20  -2   -0.02    0.07
  24 -20   2    0.00    0.16
 -24  20  -2    0.03    0.05
 -23 -21   2    0.32    0.08
  23 -21  -2    0.21    0.15
  21 -21  -2    0.95    0.18
  21  21  -2    0.68    0.09
 -21  21   2    0.72    0.09
  19 -21  -2    0.06    0.15
 -19 -21   2    0.12    0.08
  19  21  -2    0.00    0.05
 -19  21   2    0.02    0.05
  17 -21  -2    1.03    0.18
 -17 -21   2    0.95    0.13
 -17  21   2    0.75    0.09
  15 -21  -2   -0.03    0.16
 -15 -21   2    0.00    0.08
 -15  21   2   -0.04    0.05
  15  21  -2   -0.02    0.05
 -13 -21   2    0.19    0.09
  13 -21  -2    0.23    0.11
 -13  21   2    0.12    0.05
  13  21  -2    0.05    0.05
 -11 -21   2    0.41    0.09
  11 -21  -2    0.27    0.14
 -11  21   2    0.31    0.05
  11  21  -2    0.32    0.05
  -9 -21   2    2.35    0.21
   9 -21  -2    2.41    0.24
   9  21  -2    2.30    0.14
  -9  21   2    2.25    0.15
   7 -21  -2    0.31    0.14
  -7 -21   2    0.41    0.12
  -7  21   2    0.42    0.06
   7  21  -2    0.49    0.07
  -5 -21   2    0.46    0.12
   5 -21  -2    0.45    0.14
  -5  21   2    0.38    0.05
   5  21  -2    0.41    0.06
  -3 -21   2    0.77    0.13
   3 -21  -2    0.72    0.13
  -3  21   2    0.81    0.09
   3  21  -2    0.70    0.07
  -1 -21   2    0.26    0.12
   1 -21  -2    0.20    0.12
  -1  21   2    0.28    0.05
   1  21  -2    0.22    0.05
  -1 -21  -2    0.65    0.14
   1 -21   2    0.92    0.15
  -1  21  -2    1.04    0.09
   1  21   2    0.84    0.08
  -3 -21  -2    0.49    0.13
   3 -21   2    0.50    0.12
   3  21   2    0.76    0.09
  -3  21  -2    0.61    0.07
  -5 -21  -2   -0.04    0.10
   5 -21   2   -0.02    0.13
   5  21   2    0.01    0.04
  -5  21  -2    0.07    0.05
   7 -21   2    1.34    0.20
  -7 -21  -2    1.71    0.17
   7  21   2    1.44    0.10
  -7  21  -2    1.43    0.10
   9 -21   2    0.26    0.13
  -9 -21  -2    0.24    0.09
  -9  21  -2    0.33    0.06
   9  21   2    0.28    0.05
 -11 -21  -2    0.80    0.12
  11 -21   2    0.82    0.17
 -11  21  -2    0.85    0.09
  11  21   2    0.81    0.09
  13 -21   2    0.81    0.17
 -13 -21  -2    0.87    0.12
 -13  21  -2    0.82    0.08
  13  21   2    0.79    0.09
 -15 -21  -2    3.20    0.22
  15 -21   2    3.47    0.30
 -15  21  -2    3.37    0.20
  15  21   2    3.14    0.20
  17 -21   2    0.65    0.16
 -17 -21  -2    0.57    0.10
  17  21   2    0.50    0.07
 -17  21  -2    0.50    0.07
  19 -21   2    0.14    0.15
 -19 -21  -2    0.16    0.08
  19  21   2    0.04    0.05
 -19  21  -2    0.03    0.05
  21 -21   2    0.29    0.17
 -21 -21  -2    0.34    0.08
 -21  21  -2    0.16    0.06
 -23 -21  -2    0.04    0.07
  23 -21   2    0.12    0.15
 -23  21  -2   -0.06    0.05
  20 -22  -2    0.33    0.15
 -20 -22   2    0.42    0.09
  20  22  -2    0.28    0.06
 -20  22   2    0.21    0.06
 -18 -22   2    0.12    0.08
  18 -22  -2    0.10    0.14
  18  22  -2    0.01    0.05
 -18  22   2    0.00    0.05
  16 -22  -2    0.24    0.14
 -16 -22   2    0.33    0.09
 -14 -22   2    0.28    0.09
  14 -22  -2    0.18    0.14
 -14  22   2    0.09    0.05
  14  22  -2    0.11    0.05
 -12 -22   2    0.52    0.10
  12 -22  -2    0.44    0.14
 -12  22   2    0.35    0.05
  10 -22  -2    2.54    0.32
 -10 -22   2    3.65    0.25
 -10  22   2    3.38    0.22
  10  22  -2    4.01    0.21
  -8 -22   2    0.73    0.13
   8 -22  -2    0.53    0.15
  -8  22   2    0.60    0.07
   8  22  -2    0.69    0.09
   6 -22  -2   -0.08    0.12
  -6 -22   2   -0.04    0.10
  -6  22   2    0.04    0.05
   6  22  -2    0.01    0.04
  -4 -22   2    0.21    0.09
   4 -22  -2    0.11    0.12
   4  22  -2    0.12    0.05
  -4  22   2    0.10    0.04
   2 -22  -2    0.57    0.12
  -2 -22   2    0.51    0.11
  -2  22   2    0.64    0.09
   2  22  -2    0.63    0.09
   0 -22  -2    0.71    0.14
   0 -22   2    0.76    0.13
   0  22   2    0.79    0.09
   0  22  -2    0.74    0.09
  -2 -22  -2    1.10    0.16
   2 -22   2    1.17    0.17
  -2  22  -2    1.31    0.11
   2  22   2    1.17    0.09
  -4 -22  -2    3.58    0.26
   4 -22   2    3.26    0.28
   4  22   2    3.38    0.21
  -4  22  -2    3.53    0.21
   6 -22   2    0.18    0.13
  -6 -22  -2    0.15    0.10
  -6  22  -2    0.13    0.05
   6  22   2    0.08    0.04
   8 -22   2    4.53    0.31
   8  22   2    3.88    0.23
  -8  22  -2    3.93    0.23
 -10 -22  -2    0.51    0.10
 -10  22  -2    0.32    0.09
  10  22   2    0.40    0.06
 -12 -22  -2    1.24    0.15
  12 -22   2    1.06    0.18
 -12  22  -2    1.25    0.11
  12  22   2    1.22    0.11
  14 -22   2    1.73    0.23
 -14 -22  -2    1.74    0.16
  14  22   2    1.72    0.13
 -14  22  -2    1.74    0.13
  16 -22   2    0.48    0.15
 -16 -22  -2    0.42    0.09
 -16  22  -2    0.21    0.06
  16  22   2    0.26    0.06
 -18 -22  -2    0.94    0.12
  18 -22   2    0.80    0.17
 -18  22  -2    0.72    0.09
  18  22   2    0.63    0.08
 -20 -22  -2    0.41    0.09
  20 -22   2    0.31    0.16
 -20  22  -2    0.21    0.06
  20  22   2    0.22    0.08
  17 -23  -2    0.23    0.13
 -17 -23   2    0.32    0.09
  17  23  -2    0.13    0.05
 -17  23   2    0.17    0.05
  15 -23  -2    0.08    0.12
 -15 -23   2    0.18    0.09
 -15  23   2    0.01    0.05
  15  23  -2    0.05    0.05
 -13 -23   2    0.60    0.10
  13 -23  -2    0.37    0.15
 -13  23   2    0.37    0.06
  13  23  -2    0.37    0.06
  11 -23  -2    0.76    0.13
 -11 -23   2    0.97    0.14
 -11  23   2    0.68    0.09
  11  23  -2    0.66    0.09
  -9 -23   2    1.39    0.15
   9 -23  -2    1.08    0.17
   9  23  -2    1.09    0.10
  -9  23   2    1.00    0.10
   7 -23  -2   -0.10    0.12
  -7 -23   2    0.02    0.10
  -7  23   2    0.02    0.05
   7  23  -2    0.10    0.05
   5 -23  -2    0.06    0.12
  -5 -23   2    0.10    0.11
   5  23  -2    0.00    0.05
  -5  23   2    0.05    0.05
  -3 -23   2    0.04    0.12
   3 -23  -2    0.03    0.11
   3  23  -2    0.06    0.04
  -3  23   2    0.02    0.05
   1 -23  -2    0.13    0.10
  -1  23   2    0.08    0.05
   1  23  -2    0.04    0.04
  -1 -23  -2    0.79    0.14
   1 -23   2    0.73    0.16
   1  23   2    0.74    0.10
  -1  23  -2    0.80    0.07
  -3 -23  -2    0.90    0.14
   3 -23   2    0.90    0.14
   3  23   2    0.69    0.07
  -3  23  -2    0.84    0.09
   5 -23   2   -0.03    0.11
  -5 -23  -2    0.05    0.10
  -5  23  -2   -0.01    0.04
   5  23   2   -0.02    0.05
  -7 -23  -2    1.18    0.15
   7 -23   2    1.53    0.20
   7  23   2    1.02    0.10
  -7  23  -2    1.05    0.10
   9 -23   2    0.58    0.15
  -9 -23  -2    0.55    0.11
  -9  23  -2    0.37    0.06
   9  23   2    0.40    0.05
  11 -23   2    0.79    0.13
 -11 -23  -2    0.64    0.11
 -11  23  -2    0.76    0.09
  11  23   2    0.62    0.09
  13 -23   2    0.13    0.14
 -13 -23  -2    0.28    0.08
  13  23   2    0.20    0.06
 -13  23  -2    0.24    0.05
  15 -23   2    2.56    0.26
 -15 -23  -2    2.80    0.20
  15  23   2    2.54    0.17
 -15  23  -2    2.74    0.17
 -17 -23  -2    0.15    0.07
  17 -23   2    0.21    0.14
  17  23   2    0.05    0.06
 -17  23  -2    0.14    0.06
  14 -24  -2    0.70    0.14
 -14  24   2    0.54    0.07
  14  24  -2    0.47    0.07
  12 -24  -2    0.14    0.13
 -12 -24   2    0.30    0.09
 -12  24   2    0.08    0.05
  12  24  -2    0.02    0.05
  10 -24  -2    0.74    0.15
  10  24  -2    0.49    0.06
 -10  24   2    0.57    0.07
   8 -24  -2    0.17    0.13
  -8 -24   2    0.50    0.11
  -8  24   2    0.29    0.06
   8  24  -2    0.26    0.06
  -6 -24   2    1.15    0.16
   6 -24  -2    0.88    0.15
  -6  24   2    0.65    0.09
   6  24  -2    0.65    0.08
   4 -24  -2    0.09    0.12
  -4 -24   2    0.12    0.11
  -4  24   2    0.09    0.04
   4  24  -2    0.06    0.05
   2 -24  -2    0.22    0.12
  -2 -24   2    0.18    0.12
  -2  24   2    0.06    0.05
   2  24  -2    0.03    0.05
   0 -24  -2    0.10    0.09
   0 -24   2    0.08    0.11
   0  24  -2   -0.05    0.05
   0  24   2   -0.09    0.05
   2 -24   2    0.18    0.12
  -2 -24  -2    0.17    0.11
  -2  24  -2    0.17    0.04
   2  24   2    0.17    0.06
  -4 -24  -2    1.56    0.17
   4 -24   2    1.57    0.19
   4  24   2    1.36    0.11
  -4  24  -2    1.34    0.12
   6 -24   2    0.02    0.09
  -6 -24  -2    0.06    0.09
  -6  24  -2   -0.02    0.04
   6  24   2   -0.02    0.05
   8 -24   2    1.94    0.20
  -8 -24  -2    1.94    0.17
   8  24   2    1.68    0.13
  -8  24  -2    1.75    0.12
 -10 -24  -2    0.18    0.09
  10 -24   2    0.10    0.13
 -10  24  -2    0.10    0.04
  10  24   2    0.08    0.05
 -12 -24  -2    1.63    0.15
  12 -24   2    1.69    0.22
  12  24   2    1.11    0.11
 -12  24  -2    1.26    0.11
 -14 -24  -2    0.57    0.10
  14 -24   2    0.50    0.14
  14  24   2    0.32    0.07
 -14  24  -2    0.46    0.06
  -9 -25   2    0.37    0.11
   9 -25  -2    0.29    0.12
   9  25  -2    0.14    0.05
  -9  25   2    0.16    0.05
   7 -25  -2    0.25    0.13
  -7 -25   2    0.34    0.10
  -7  25   2    0.21    0.05
   7  25  -2    0.17    0.06
   5 -25  -2    0.16    0.12
  -5 -25   2    0.34    0.11
  -5  25   2    0.12    0.06
   5  25  -2    0.05    0.05
   3 -25  -2    0.06    0.12
  -3 -25   2    0.19    0.11
   3  25  -2    0.03    0.05
  -3  25   2    0.08    0.05
   1 -25  -2    0.48    0.12
  -1 -25   2    0.36    0.11
  -1  25   2    0.23    0.06
   1  25  -2    0.24    0.06
   1 -25   2    0.13    0.12
  -1 -25  -2    0.14    0.09
   1  25   2    0.04    0.05
  -1  25  -2    0.07    0.05
  -3 -25  -2    0.23    0.11
   3 -25   2    0.16    0.12
   3  25   2    0.07    0.05
  -3  25  -2    0.05    0.04
  -5 -25  -2    0.43    0.10
   5 -25   2    0.58    0.13
   5  25   2    0.37    0.06
  -5  25  -2    0.43    0.07
  -7 -25  -2    0.32    0.09
   7 -25   2    0.30    0.12
   7  25   2    0.15    0.06
  -7  25  -2    0.13    0.06
  42   0  -3    0.31    0.09
  40   0  -3    1.78    0.18
  38   0  -3    0.00    0.09
  36   0  -3    2.11    0.19
  34   0  -3    0.11    0.09
 -32   0   3    0.20    0.06
  32   0  -3    0.11    0.09
  30   0  -3    0.34    0.09
 -30   0   3    0.37    0.06
 -28   0   3    4.46    0.25
  28   0  -3    4.38    0.29
 -26   0   3    4.08    0.24
 -26   0   3    4.37    0.24
  26   0  -3    4.18    0.27
 -24   0   3    0.09    0.17
 -24   0   3    0.17    0.04
 -24   0   3    0.10    0.04
  24   0  -3    0.06    0.07
 -22   0   3    0.26    0.04
 -22   0   3    0.16    0.14
  22   0  -3    0.26    0.15
 -22   0   3    0.31    0.04
  22   0  -3    0.20    0.08
 -20   0   3    2.76    0.32
  20   0  -3    2.89    0.29
  20   0  -3    2.74    0.20
 -20   0   3    2.76    0.16
 -20   0   3    3.05    0.16
 -18   0   3    4.01    0.22
 -18   0   3    4.23    0.36
  18   0  -3    4.01    0.24
 -18   0   3    3.69    0.22
  18   0  -3    4.29    0.33
 -16   0   3   11.70    0.73
  16   0  -3   11.94    0.64
 -16   0   3   11.32    0.62
  16   0  -3   12.14    0.71
 -16   0   3   12.41    0.63
  14   0  -3   22.74    1.19
  14   0  -3   23.26    1.25
 -14   0   3   21.65    1.18
 -14   0   3   22.64    1.26
 -12   0   3    4.71    0.25
  12   0  -3    4.45    0.31
  12   0  -3    4.71    0.26
 -12   0   3    4.53    0.24
 -12   0   3    4.20    0.35
  10   0  -3   46.37    2.45
 -10   0   3   45.95    2.46
  -8   0   3   69.96    3.89
   8   0  -3   78.30    3.89
   6   0  -3   52.43    2.77
  -6   0   3   53.12    2.78
  -4   0   3  224.48   13.09
   4   0  -3  252.56   13.22
  -4   0   3  242.30   13.59
  -2   0   3   34.09    2.31
  -2   0   3   40.94    2.69
   2   0  -3   35.25    2.33
   0   0  -3   28.73    1.93
   0   0   3   27.97    1.76
   0   0   3   27.37    1.89
   0   0  -3   26.28    1.71
  -2   0  -3   53.20    2.72
   2   0   3   50.60    2.72
   4   0   3  138.58    8.06
  -4   0  -3  154.98    8.03
   4   0   3  130.78    8.00
  -6   0  -3   15.71    0.88
   6   0   3   15.79    0.84
   6   0   3   16.38    0.88
   8   0   3   49.61    2.54
  -8   0  -3   49.08    2.54
   8   0   3   44.89    2.49
[truncated: 2,276,415 more chars]
